# Supplementary material for: Human cytomegalovirus IE2 drives transcription initiation from a select subset of late infection viral promoters by host RNA polymerase II
Source: PLoS Pathog. 2020 Apr 6;16(4):e1008402. doi: 10.1371/journal.ppat.1008402 (PMC7162547; doi:10.1371/journal.ppat.1008402)
Supplement: S2 Data — (XLSX) [file ppat.1008402.s009.xlsx]

## Sheet: Effect of Infection
Gene Name	Uninfected Pause Region	Infected Pause Region (Exp1 No dTAG)	Uninfected Gene Body	Infected Gene Body (Exp1 No dTAG)	Pause Region - Infected / Uninfected	Gene Body - Infected / Uninfected
SELENOP	250.454	22.9437	439.202	18.5735	0.0916085	0.0422891
TXNIP	1266.79	117.996	2437.39	145.31	0.0931459	0.0596171
CRABP2	546.28	60.0907	408.349	123.459	0.11	0.302337
SLC7A8	441.924	49.1651	344.828	242.548	0.111252	0.703388
SFRP2	343.013	45.8874	737.751	95.0525	0.133777	0.128841
PCDH18	683.304	91.7748	4023.6	285.158	0.13431	0.0708713
YPEL4	238.657	33.8693	115.245	22.9437	0.141916	0.199086
COL1A2	2294.92	344.156	26005.5	2682.23	0.149964	0.103141
FLRT3	226.861	36.0544	352.088	38.2395	0.158928	0.108608
IGFBP3	680.582	115.811	1547.19	157.328	0.170165	0.101687
CBR3	320.327	54.6279	254.991	111.441	0.170538	0.437038
PLTP	182.396	31.6842	167.877	131.107	0.173711	0.780971
GJA1	391.108	72.1088	2234.12	513.502	0.184371	0.229845
SLC47A1	707.805	135.477	66.2433	392.228	0.191405	5.92103
DCLK2	370.236	71.0162	3438.3	1502.27	0.191813	0.436922
ARMH4	890.201	174.809	638.839	558.297	0.196371	0.873924
MAB21L1	519.964	102.7	572.596	124.552	0.197514	0.217521
GDF6	313.068	64.4609	286.752	85.2195	0.205901	0.297189
NDUFS7	567.151	116.904	254.084	466.522	0.206124	1.8361
IGFBP5	1254.09	260.029	2200.55	829.251	0.207345	0.376839
FBXO31	572.596	122.366	586.208	1409.4	0.213705	2.40427
SPARC	1337.57	287.343	5265.89	1255.35	0.214824	0.238393
LUC7L2	902.905	194.475	1949.19	2511.79	0.215388	1.28864
FMC1-LUC7L2	902.905	194.475	1929.22	2477.92	0.215388	1.28441
FMC1	902.905	194.475	227.768	279.695	0.215388	1.22798
KCTD2	1319.42	312.471	404.719	701.422	0.236825	1.73311
LRIG3	260.436	63.3683	4968.25	923.211	0.243316	0.185822
POLR3E	1470.96	359.451	551.725	1281.57	0.244365	2.32284
MYNN	1532.67	375.84	655.173	521.15	0.245219	0.795438
MMP19	221.416	54.6279	88.0219	78.6642	0.246721	0.893688
C8orf37	1451	358.359	195.1	119.089	0.246974	0.610398
SOX4	207.804	52.4428	327.587	265.492	0.252366	0.810447
PRRX1	237.75	63.3683	5290.39	2665.84	0.266534	0.503903
PRICKLE1	296.734	83.0344	2952.82	935.229	0.279828	0.316724
LRP3	799.457	223.974	319.42	596.536	0.280158	1.86756
SDC2	321.235	90.6823	927.406	633.683	0.282293	0.683286
EFNB3	150.635	42.6097	13.6116	16.3884	0.282867	1.204
KIF26B	150.635	42.6097	5344.84	2132.67	0.282867	0.399016
TMEM119	145.191	41.5172	334.846	107.071	0.285949	0.319761
NRP1	129.764	37.147	3741.38	3008.9	0.286265	0.804222
ZNF839	950.092	272.047	257.714	571.408	0.286337	2.21722
IRX5	228.675	65.5535	148.821	116.904	0.286666	0.785535
CPZ	289.474	83.0344	537.206	248.011	0.286846	0.461668
AR	139.746	40.4246	1748.64	724.366	0.289272	0.414245
COL3A1	536.298	156.236	5435.58	772.438	0.291322	0.142108
AL163195.3	306.716	90.6823	8.16698	26.2214	0.295656	3.21066
RNASE11	306.716	90.6823	8.16698	26.2214	0.295656	3.21066
LRRN4CL	180.581	54.6279	101.634	223.974	0.302512	2.20374
ACOX2	129.764	39.3321	226.861	116.904	0.303104	0.515311
ERCC1	270.418	83.0344	563.522	1187.61	0.30706	2.10748
CEMIP	500.908	157.328	10282.2	3400.04	0.314086	0.330671
MAGED1	259.529	81.9418	357.532	221.789	0.315733	0.620333
PLCD3	563.522	178.087	323.049	487.281	0.316025	1.50838
COL1A1	2862.98	905.73	4278.59	2870.15	0.316359	0.670816
HSPB1	654.266	208.679	191.47	156.236	0.318951	0.815979
THY1	450.999	144.218	444.647	204.308	0.319774	0.459485
MDGA1	117.06	38.2395	205.082	209.771	0.326666	1.02286
LOX	288.567	95.0525	1209.62	416.264	0.329395	0.344128
ACKR3	334.846	110.348	490.019	218.512	0.329549	0.445925
IGFBP6	122.505	40.4246	256.806	227.252	0.329984	0.884916
ARL15	108.893	36.0544	2153.36	1481.51	0.331099	0.687998
AC080038.1	228.675	76.479	1607.08	1086	0.334444	0.675761
HOXA11	398.367	133.292	374.774	194.475	0.334596	0.518914
HOXA3	88.0219	29.4991	337.569	223.974	0.335133	0.663493
ITPKB	133.394	45.8874	1302.18	1389.73	0.343999	1.06724
EPHB3	730.491	251.288	478.222	293.898	0.343999	0.614564
BMP4	212.342	73.2014	967.334	449.041	0.344734	0.464205
AKNA	186.026	64.4609	547.188	2248.48	0.346516	4.10916
TCF7L2	237.75	83.0344	4388.39	3550.81	0.349251	0.809138
AKAP12	299.456	104.886	1496.37	896.99	0.350254	0.599443
WNT2	127.042	44.7949	874.774	316.842	0.352599	0.362198
SH3BP5	202.36	72.1088	1392.02	736.384	0.35634	0.529005
NEMP1	615.246	219.604	1183.3	1521.93	0.356937	1.28617
GRASP	569.874	204.308	269.51	233.807	0.358515	0.867526
HOXA13	166.969	60.0907	695.101	162.791	0.35989	0.234198
SVIL	199.637	72.1088	5914.71	3579.22	0.361199	0.605139
PHLDB1	309.438	112.533	963.704	1765.57	0.363671	1.83207
AC091167.2	107.986	39.3321	274.048	518.965	0.364234	1.8937
TTLL13P	107.986	39.3321	27.2233	27.3139	0.364234	1.00333
PAG1	416.516	151.866	805.809	1059.78	0.364609	1.31518
EFEMP1	139.746	51.3502	2242.29	513.502	0.367454	0.229008
COL16A1	424.683	156.236	665.155	884.972	0.367888	1.33047
LXN	133.394	49.1651	478.222	54.6279	0.36857	0.114231
SERPINF1	97.0963	36.0544	176.044	171.532	0.371326	0.974369
FAM171B	97.0963	36.0544	381.126	219.604	0.371326	0.576198
LPAR6	135.209	50.2577	328.494	37.147	0.371704	0.113083
TBX5	137.931	51.3502	2885.67	1278.29	0.372288	0.44298
TCIM	272.233	101.608	196.008	57.9056	0.373239	0.295425
SLC40A1	127.949	48.0725	167.877	27.3139	0.375715	0.162702
FBXL7	402.904	151.866	8896.56	3193.55	0.376927	0.358964
MMP14	960.074	362.729	1219.6	2177.47	0.377814	1.78539
TWIST1	727.769	277.51	2764.07	1436.71	0.381316	0.519782
JAG1	638.839	243.64	628.858	431.56	0.38138	0.686261
EPHX1	657.896	251.288	311.253	325.582	0.381958	1.04604
VWA5A	192.378	74.2939	187.841	73.2014	0.386188	0.389699
TGFBR3	340.291	132.199	3889.3	3205.56	0.38849	0.824201
CDC42EP5	106.171	41.5172	117.968	130.014	0.391042	1.10212
NTF3	194.193	76.479	1220.51	748.402	0.393831	0.613188
SEMA3F	312.16	123.459	197.822	227.252	0.395499	1.14877
ANKRD33B	325.772	128.922	1536.3	768.068	0.395743	0.499947
SIM1	234.12	92.8674	5760.44	1688	0.396666	0.293033
GAS1	274.955	109.256	835.754	379.118	0.397359	0.453623
THBS1	2382.04	947.248	27174.3	9899.67	0.397663	0.364303
STARD5	386.57	154.051	153.358	178.087	0.398506	1.16125
MCC	186.026	74.2939	3004.54	1411.58	0.399375	0.469817
LAMA2	144.283	57.9056	8165.17	604.184	0.401332	0.0739954
NAB2	421.961	169.346	1027.22	906.823	0.401332	0.882789
CD248	225.953	90.6823	320.327	192.29	0.401332	0.600293
ST3GAL1	203.267	81.9418	1165.16	2169.82	0.403124	1.86226
SVBP	145.191	58.9981	148.821	87.4046	0.406349	0.587316
NFKB2	215.064	87.4046	100.726	214.141	0.406412	2.12598
PDGFRA	204.175	83.0344	4653.36	2149.06	0.406683	0.46183
SELENBP1	185.118	75.3865	49.0019	26.2214	0.407234	0.53511
SMO	176.951	72.1088	117.06	98.3302	0.407507	0.839998
KLHDC8B	189.655	77.5716	65.3358	75.3865	0.409013	1.15383
DGAT1	767.696	314.657	86.207	403.154	0.409871	4.67658
FIBIN	165.155	67.7386	98.0038	50.2577	0.410153	0.512813
PXDC1	337.569	138.755	965.519	1559.08	0.411042	1.61476
COL5A2	111.615	45.8874	7228.69	1432.34	0.411121	0.198147
RHPN2	248.639	102.7	209.619	647.887	0.41305	3.09078
TPM2	374.774	155.143	276.77	339.785	0.413965	1.22768
RETSAT	265.881	110.348	108.893	242.548	0.41503	2.22739
GRK4	86.207	36.0544	266.788	249.103	0.41823	0.933712
S100A6	874.774	367.099	461.888	375.84	0.41965	0.813703
ZBED9	366.607	154.051	73.5028	228.345	0.420207	3.10661
RASL11A	436.48	183.55	68.0582	74.2939	0.420523	1.09162
DOCK10	129.764	54.6279	2470.06	1306.7	0.420978	0.529016
CACHD1	199.637	84.1269	2389.3	1280.48	0.421399	0.535923
TSHZ1	266.788	112.533	3300.37	909.008	0.421808	0.275426
AL163636.2	418.331	176.994	265.881	258.936	0.423096	0.973881
RNASE4	418.331	176.994	276.77	260.029	0.423096	0.939512
BCAM	126.134	53.5353	10.8893	34.9618	0.424431	3.21066
EGFR	639.747	273.139	2747.74	4334.18	0.426949	1.57736
DPP9	573.504	246.918	535.391	1842.05	0.430543	3.44057
COL12A1	407.442	176.994	6113.44	1955.68	0.434404	0.319898
MYH10	85.2996	37.147	1675.14	1562.36	0.435488	0.932674
DOCK4	115.245	50.2577	1291.29	622.758	0.436093	0.482276
HFE	72.5954	31.6842	137.024	95.0525	0.436449	0.693694
ADAMTS9	147.006	64.4609	567.151	562.667	0.438493	0.992093
ENC1	127.042	55.7204	303.086	248.011	0.438599	0.818285
COL5A1	629.765	276.417	3073.51	6129.25	0.438921	1.99422
PPP1R3C	762.252	335.415	465.518	128.922	0.440032	0.276943
LDLR	459.166	202.123	1853.9	1482.6	0.440196	0.799718
TWIST2	704.175	310.286	4451.91	5030.14	0.440638	1.12988
FBLN5	176.044	77.5716	1014.52	541.909	0.440638	0.534152
MAP3K6	101.634	44.7949	186.026	180.272	0.440749	0.969071
FRMD6	498.186	219.604	6588.94	2835.19	0.440808	0.430295
RGS10	128.857	56.813	282.215	262.214	0.4409	0.929129
CTSK	227.768	100.515	835.754	488.373	0.441306	0.58435
SLC9A3R2	116.153	51.3502	150.635	353.989	0.442093	2.34997
PCSK5	359.347	159.513	2359.35	1068.52	0.443898	0.452888
PLA2R1	90.7442	40.4246	2153.36	631.498	0.445479	0.293262
GRIK2	80.7624	36.0544	5801.28	546.279	0.446426	0.0941652
TNFAIP8	229.583	102.7	1559.89	552.834	0.447335	0.354405
PYGL	173.321	77.5716	739.565	488.373	0.447559	0.660352
AL022318.4	211.434	95.0525	319.42	370.377	0.449561	1.15953
APOBEC3C	211.434	95.0525	98.0038	67.7386	0.449561	0.691183
FZD2	140.654	63.3683	208.712	169.346	0.450528	0.811389
PCDH9	139.746	63.3683	436.48	171.532	0.453453	0.392989
CDH11	457.351	207.586	11912.9	3774.79	0.453888	0.316865
LOXL4	287.659	131.107	874.774	1009.52	0.455772	1.15404
SESN3	119.782	54.6279	1591.65	249.103	0.456059	0.156506
OLFML3	112.523	51.3502	384.756	208.679	0.456354	0.542366
CXXC5	282.215	128.922	1063.52	963.636	0.456822	0.90608
SERTAD1	1160.62	530.983	380.218	464.337	0.4575	1.22124
TPRA1	128.857	58.9981	350.273	656.627	0.457858	1.87462
FASN	744.103	340.878	193.285	787.734	0.458106	4.0755
HMGN5	80.7624	37.147	134.301	103.793	0.459954	0.772836
CYP1B1	127.949	58.9981	554.447	208.679	0.461105	0.376372
ADD3	226.861	104.886	3930.13	946.155	0.462335	0.240744
S100A4	254.991	117.996	351.18	227.252	0.462746	0.647109
ARID5B	165.155	76.479	12072.6	7088.51	0.463076	0.587157
CACNA1G	122.505	56.813	103.448	37.147	0.463762	0.359087
EHD3	115.245	53.5353	541.743	469.8	0.464534	0.8672
ADGRL2	107.986	50.2577	4354.82	858.75	0.465411	0.197196
GSTM2	100.726	46.98	358.44	238.178	0.466413	0.664484
SOX11	592.56	276.417	665.155	609.647	0.46648	0.916549
MARCKS	392.015	183.55	1064.43	712.348	0.468221	0.669229
MAGED2	120.69	56.813	210.527	338.693	0.470736	1.60879
TEAD3	104.356	49.1651	323.957	646.794	0.471129	1.99654
SMAD6	385.663	182.457	1467.33	1054.32	0.4731	0.718526
ADGRV1	115.245	54.6279	153.358	134.385	0.474014	0.876282
ETHE1	310.345	147.495	382.941	322.305	0.475262	0.841657
MCEE	215.971	102.7	482.759	249.103	0.475528	0.515999
DAAM2	181.488	86.3121	1517.24	677.386	0.475579	0.446458
IFI16	234.12	111.441	2241.38	2484.48	0.475999	1.10846
DHCR24	417.423	198.845	644.284	321.212	0.476364	0.498556
SOD3	126.134	60.0907	117.06	29.4991	0.476402	0.251999
C1R	139.746	66.646	415.609	378.025	0.476908	0.90957
ARHGAP28	196.915	93.96	2262.25	358.359	0.47716	0.158408
UST	201.452	96.1451	2862.07	3380.37	0.47726	1.18109
ATP8B1	264.973	126.737	1585.3	1537.23	0.4783	0.969676
GLIS2	257.714	123.459	305.808	936.322	0.479055	3.0618
FSTL1	524.502	251.288	3723.24	2953.18	0.479099	0.793177
RGS2	582.578	279.695	203.267	43.7023	0.480098	0.214999
SC5D	354.81	170.439	1056.26	645.702	0.480367	0.611308
MEIS2	225.953	109.256	5774.96	2399.26	0.483533	0.415458
SNAI2	584.393	282.972	423.776	162.791	0.484216	0.384145
ISL1	427.405	207.586	649.729	215.234	0.485689	0.331267
GLCCI1	426.498	208.679	1264.97	734.199	0.489284	0.580406
SH3D21	169.692	83.0344	305.808	673.016	0.489325	2.20078
ADAM33	283.122	138.755	797.642	598.722	0.490088	0.750615
RHOF	639.747	314.657	1022.69	1600.6	0.491846	1.56509
PBX1	382.033	187.92	7593.48	3000.16	0.491894	0.395097
BTG2	1199.64	591.074	294.011	207.586	0.49271	0.706048
LMNA	1756.81	866.398	1222.32	2209.15	0.493166	1.80734
ITGA11	70.7805	34.9618	1047.19	601.999	0.493947	0.574872
LURAP1L	324.864	160.606	2387.48	1797.26	0.494379	0.752784
CLEC11A	132.487	65.5535	225.953	355.081	0.494793	1.57148
MN1	225.046	111.441	990.927	898.082	0.495192	0.906305
BOC	149.728	74.2939	1343.92	949.433	0.496193	0.706464
ADAMTS1	687.841	341.971	2657.9	1244.42	0.497165	0.468198
TFRC	276.77	137.662	376.589	931.952	0.497389	2.47472
IGFBP4	695.101	346.341	994.557	1025.91	0.49826	1.03153
GATA2	164.247	81.9418	106.171	85.2195	0.498894	0.802665
GIPC2	260.436	130.014	921.961	465.43	0.499218	0.504825
DNAJB4	260.436	130.014	483.667	231.622	0.499218	0.478888
MXD4	267.695	134.385	375.681	497.114	0.502005	1.32323
STK17B	399.275	201.031	1127.04	670.83	0.50349	0.595213
ID3	127.949	64.4609	58.0763	83.0344	0.5038	1.42975
MBNL2	157.895	79.7567	3092.56	2263.78	0.505125	0.732007
VGLL3	170.599	86.3121	4784.94	1096.93	0.505935	0.229246
AC006064.6	466.425	235.992	1017.24	2582.81	0.50596	2.53903
CHD4	466.425	235.992	647.006	1559.08	0.50596	2.40968
CREB3L1	353.903	179.179	1197.82	984.394	0.506296	0.821819
CAMSAP2	303.993	154.051	2411.98	2782.74	0.506757	1.15372
AC005324.3	167.877	85.2195	641.562	727.643	0.507631	1.13418
UBL3	251.362	127.829	2092.56	1282.66	0.508547	0.612963
UTRN	117.968	60.0907	6124.33	5184.19	0.509383	0.846491
PLAC9	117.968	60.0907	325.772	93.96	0.509383	0.288423
SERTAD2	325.772	166.069	1233.21	1624.63	0.50977	1.3174
EPHA4	190.563	97.2376	1305.81	727.643	0.510265	0.557235
LGALS3	407.442	208.679	1088.02	644.609	0.512168	0.592459
FTL	554.447	284.065	949.185	724.366	0.512339	0.763145
GSTA4	153.358	78.6642	399.275	183.55	0.512945	0.459708
ARHGAP20	215.064	110.348	1636.12	663.183	0.513096	0.405339
TMEM45A	191.47	98.3302	952.814	289.528	0.513553	0.303866
VDR	263.158	135.477	852.088	727.643	0.514812	0.853953
CALCOCO1	76.2252	39.3321	661.525	833.622	0.515999	1.26015
BBS9	103.448	53.5353	2028.13	1672.71	0.517507	0.824751
PDGFRB	375.681	194.475	2551.73	1545.97	0.51766	0.605852
BAZ2A	98.9112	51.3502	863.885	1710.95	0.519155	1.98052
IFITM3	271.325	140.94	148.821	346.341	0.51945	2.32724
KDELR3	119.782	62.2758	418.331	167.161	0.519908	0.399591
MICB	100.726	52.4428	144.283	322.305	0.520647	2.23383
TLE4	335.754	174.809	4958.26	2825.35	0.520647	0.569827
BCL9L	405.627	211.956	1199.64	2318.41	0.52254	1.93259
ADGRD1	275.862	144.218	2477.32	2429.85	0.522788	0.980838
DMPK	196.008	102.7	325.772	1206.18	0.523962	3.70254
KCTD11	154.265	80.8493	139.746	124.552	0.524093	0.89127
AC112128.1	99.8187	52.4428	1057.17	584.518	0.52538	0.552908
SPICE1	99.8187	52.4428	551.725	274.232	0.52538	0.497045
SPON2	58.0763	30.5916	184.211	174.809	0.526749	0.948963
LARGE1	327.587	172.624	2886.57	4233.66	0.526957	1.46667
KLF4	867.515	457.782	622.505	965.821	0.527693	1.55151
SCAI	200.545	105.978	931.943	1083.82	0.528451	1.16296
UNKL	150.635	79.7567	324.864	611.832	0.529468	1.88335
TUBA1A	451.906	239.27	509.075	363.822	0.529468	0.714672
TNFRSF1A	364.792	193.383	710.527	1002.97	0.530118	1.41158
IDH1	175.136	92.8674	427.405	440.301	0.530258	1.03017
RHOU	185.118	98.3302	345.736	226.159	0.531175	0.65414
SLC43A1	149.728	79.7567	262.251	676.293	0.532677	2.5788
PGM2L1	149.728	79.7567	289.474	176.994	0.532677	0.611434
FNBP1L	127.042	67.7386	873.867	745.124	0.533199	0.852675
SNX33	104.356	55.7204	394.737	523.335	0.533946	1.32578
VSIR	478.222	255.658	552.632	592.166	0.534602	1.07154
RCN3	106.171	56.813	207.804	234.9	0.53511	1.13039
SPPL3	263.158	140.94	1341.2	2208.06	0.535571	1.64633
ZNF521	207.804	111.441	7514.53	3239.43	0.536278	0.431089
CDO1	162.432	87.4046	100.726	43.7023	0.538099	0.433873
GREB1L	113.43	61.1832	673.322	694.867	0.539391	1.032
ADGRA2	192.378	103.793	1137.93	1481.51	0.539527	1.30193
PTGS1	149.728	80.8493	430.128	315.749	0.539974	0.734082
LRRK2	123.412	66.646	941.018	351.804	0.540028	0.373854
EFNA4	107.078	57.9056	41.7423	45.8874	0.540778	1.0993
AL691442.1	107.078	57.9056	275.862	282.972	0.540778	1.02577
EEF2K	107.078	57.9056	688.749	685.034	0.540778	0.994606
CEBPD	1174.23	636.961	369.329	353.989	0.54245	0.958464
SLC2A1	426.498	231.622	1175.14	1142.82	0.543079	0.972495
N4BP2L1	76.2252	41.5172	313.068	541.909	0.544665	1.73096
KSR1	184.211	100.515	935.573	845.64	0.545654	0.903873
LPCAT1	156.08	85.2195	696.916	1621.36	0.545999	2.32647
SLC39A8	88.0219	48.0725	663.34	716.718	0.546143	1.08047
CDNF	88.0219	48.0725	183.303	184.642	0.546143	1.0073
HMOX1	774.048	422.82	665.155	741.847	0.546245	1.1153
AAMDC	294.011	160.606	712.342	792.104	0.546258	1.11197
FKBP10	119.782	65.5535	253.176	383.488	0.547271	1.51471
HYAL3	359.347	196.66	180.581	252.381	0.547271	1.3976
NAA80	359.347	196.66	82.5773	110.348	0.547271	1.3363
COPZ2	123.412	67.7386	494.556	334.323	0.548881	0.676006
FOXC1	196.915	108.163	195.1	210.864	0.549289	1.0808
CDKN1B	198.73	109.256	865.7	500.391	0.54977	0.578019
NBPF26	115.245	63.3683	2438.3	2647.27	0.549857	1.0857
AC253572.1	115.245	63.3683	1589.84	1318.72	0.549857	0.829466
SIX2	73.5028	40.4246	58.0763	13.1107	0.549974	0.225749
PLPP3	291.289	160.606	2764.07	1502.27	0.551363	0.543498
BACE1	118.875	65.5535	249.547	457.782	0.551449	1.83445
LRCH1	118.875	65.5535	1537.21	2071.49	0.551449	1.34757
NQO1	130.672	72.1088	329.402	527.705	0.551832	1.60201
BMP1	77.1326	42.6097	477.315	559.39	0.552422	1.17195
RBPMS	264.973	146.403	7179.68	5662.73	0.552519	0.788715
DUSP10	110.708	61.1832	330.309	388.951	0.552654	1.17754
STXBP1	354.81	197.753	607.986	847.825	0.557349	1.39448
GATA6	137.024	76.479	348.458	343.063	0.558144	0.984518
ARHGAP26	201.452	112.533	1371.15	1741.54	0.558611	1.27013
PTPRK	359.347	201.031	10510.9	5380.85	0.559433	0.51193
WWTR1	202.36	113.626	2676.05	2631.97	0.561505	0.983529
MMP2	151.543	85.2195	1877.5	1276.11	0.562346	0.679685
CDC42EP4	627.043	353.989	578.041	1080.54	0.564537	1.86931
LGR4	131.579	74.2939	607.079	396.598	0.564633	0.65329
PLXDC1	2014.52	1140.63	1587.12	983.302	0.566204	0.619552
GLI2	63.521	36.0544	1321.24	2001.57	0.567599	1.51492
CDKN1C	257.714	146.403	153.358	131.107	0.568083	0.854909
DLC1	99.8187	56.813	4031.77	3719.07	0.569162	0.922441
SERPINH1	540.836	308.101	1034.48	1317.62	0.569676	1.2737
ZSWIM6	1157.9	660.997	4850.28	3108.33	0.570861	0.640855
TP53INP1	324.864	185.735	918.332	595.444	0.57173	0.648397
MGST3	164.247	93.96	602.542	652.257	0.572065	1.08251
LGALS1	869.33	498.206	705.083	820.511	0.573092	1.16371
OSR2	952.814	547.371	3596.19	280.787	0.574478	0.078079
FBLN1	260.436	149.68	4867.52	3247.08	0.57473	0.667091
PDGFA	184.211	105.978	355.717	871.861	0.575309	2.45099
IL17RD	165.155	95.0525	645.191	255.658	0.575537	0.396252
EFNB1	187.841	108.163	114.338	139.847	0.575825	1.22311
C14orf132	550.817	317.934	906.535	733.106	0.577204	0.808691
MTRNR2L6	66.2433	38.2395	1.81488	13.1107	0.577259	7.22398
EBF1	139.746	80.8493	3231.4	1470.58	0.578544	0.455091
CHPF	188.748	109.256	133.394	249.103	0.578845	1.86742
ARMC9	120.69	69.9237	3659.71	2256.13	0.579367	0.616477
C2CD5	73.5028	42.6097	1049.91	593.259	0.579702	0.565056
JUP	196.008	113.626	138.839	233.807	0.579702	1.68402
SQLE	171.507	99.4227	1037.21	371.47	0.579702	0.358144
PDZRN3	101.634	58.9981	5100.73	2010.31	0.580498	0.394121
MAPK10	54.4465	31.6842	390.2	245.825	0.581932	0.629998
S100A13	247.732	144.218	352.088	362.729	0.582152	1.03022
TPST1	753.177	439.208	1921.06	1531.77	0.583141	0.797356
ZNF92	132.487	77.5716	319.42	232.715	0.585505	0.728555
CCDC7	173.321	101.608	1192.38	815.048	0.586239	0.683548
TTC21B	281.307	164.976	1939.2	1408.31	0.586463	0.726229
PLA2G15	217.786	127.829	68.9656	205.401	0.586948	2.97831
PRUNE2	72.5954	42.6097	867.515	435.931	0.586948	0.502505
MIDN	1057.17	621.665	1316.7	2416.74	0.588047	1.83545
ID4	278.585	163.884	37.2051	53.5353	0.588272	1.43892
TTC37	85.2996	50.2577	1460.07	1115.5	0.58919	0.764003
PMP22	181.488	107.071	1491.84	738.569	0.589958	0.495074
TAGLN2	322.142	190.105	232.305	386.765	0.590128	1.6649
STAT5A	94.374	55.7204	98.9112	191.198	0.590422	1.93302
PLXNB2	260.436	154.051	550.817	1533.95	0.591511	2.78486
ID2	1382.94	819.418	519.057	232.715	0.592518	0.448341
CA12	60.7986	36.0544	145.191	103.793	0.593013	0.714873
IRF3	128.857	76.479	106.171	269.862	0.59352	2.54177
KAT6B	132.487	78.6642	3527.23	1939.29	0.593752	0.549806
NECTIN1	275.862	163.884	155.173	387.858	0.594077	2.49953
PTPRD	71.6879	42.6097	1708.71	721.088	0.594378	0.422006
S1PR2	225.953	134.385	356.625	388.951	0.594745	1.09064
BDH2	75.3177	44.7949	380.218	180.272	0.594745	0.474128
CNNM4	938.295	558.297	130.672	207.586	0.595012	1.58861
CD81	908.35	540.816	429.22	870.768	0.595383	2.02872
CRISPLD2	254.991	151.866	278.585	216.326	0.595571	0.776519
CASTOR1	89.8368	53.5353	53.5391	74.2939	0.595918	1.38766
SAR1B	226.861	135.477	882.034	982.209	0.597182	1.11357
CDK6	120.69	72.1088	4792.2	3190.27	0.597472	0.665721
CERCAM	126.134	75.3865	179.674	189.012	0.597667	1.05198
CAPN5	403.812	241.455	237.75	293.898	0.59794	1.23616
SDC4	1270.42	760.42	843.921	1312.16	0.598558	1.55484
AC037459.1	180.581	108.163	659.711	678.478	0.598973	1.02845
EGLN3	406.534	243.64	44.4647	33.8693	0.599311	0.761712
TOR1AIP1	204.175	122.366	976.408	765.883	0.599323	0.784388
ACSF2	213.249	127.829	270.418	489.466	0.599437	1.81004
ACTA2	108.893	65.5535	986.39	459.967	0.601998	0.466313
HAS3	87.1145	52.4428	28.1307	56.813	0.601998	2.01961
PTPN14	85.2996	51.3502	1532.67	2452.79	0.601998	1.60034
ZEB2	72.5954	43.7023	5414.71	2690.97	0.601998	0.496974
SLC22A17	161.525	97.2376	124.32	64.4609	0.601998	0.51851
IER5	777.678	470.892	460.073	701.422	0.605511	1.52459
SSBP2	129.764	78.6642	7097.11	4600.76	0.606208	0.648259
FAM43A	1294.01	784.456	254.991	367.099	0.60622	1.43965
RDH10	392.015	238.178	925.591	514.595	0.607572	0.555963
IGFBP2	91.6517	55.7204	266.788	338.693	0.607959	1.26952
HMGCR	258.621	157.328	1285.85	518.965	0.608335	0.403598
FERMT2	455.536	277.51	2063.52	2711.73	0.609194	1.31412
DLG5	150.635	91.7748	790.382	1890.12	0.609251	2.39141
TBX2	365.699	222.882	473.685	703.607	0.609467	1.48539
TP53I11	145.191	88.4972	718.694	721.088	0.609523	1.00333
PIK3R1	290.382	176.994	2666.07	1177.78	0.609523	0.441766
FAM110B	137.931	84.1269	2930.13	1920.72	0.609919	0.655505
PTPRU	60.7986	37.147	700.545	871.861	0.610983	1.24455
PNPLA3	357.532	218.512	355.717	392.228	0.611166	1.10264
PPP1R10	1148.82	702.515	4545.38	5640.88	0.611509	1.24101
AP3B2	53.5391	32.7767	41.7423	192.29	0.612202	4.6066
C9orf85	51.7242	31.6842	925.591	676.293	0.61256	0.730661
COL7A1	94.374	57.9056	70.7805	260.029	0.613575	3.67373
DHRS3	185.118	113.626	2719.6	1657.41	0.613802	0.60943
TGFBI	129.764	79.7567	193.285	468.707	0.614628	2.42495
OBSL1	81.6698	50.2577	489.111	882.787	0.615376	1.80488
SH3PXD2A	81.6698	50.2577	2931.04	3845.8	0.615376	1.3121
PTK7	191.47	117.996	1029.95	1348.22	0.616264	1.30902
NR3C1	113.43	69.9237	3163.34	3439.37	0.616446	1.08726
GYS1	270.418	167.161	214.156	473.077	0.618159	2.20903
ANKRD50	250.454	155.143	1479.13	786.642	0.619448	0.531827
TIMP2	1024.5	634.776	1638.84	3560.65	0.619594	2.17266
C1orf216	119.782	74.2939	113.43	120.181	0.620241	1.05952
NLGN1	59.8912	37.147	1915.61	371.47	0.620241	0.193917
CCDC8	179.674	111.441	156.988	93.96	0.620241	0.598519
CALR	404.719	251.288	243.195	548.464	0.620895	2.25525
SOX13	397.46	246.918	154.265	406.431	0.62124	2.63463
CCL2	244.102	151.866	297.641	398.784	0.62214	1.33981
ZCCHC14	206.897	128.922	903.813	2504.14	0.623121	2.77064
SUSD6	231.398	144.218	893.831	1171.22	0.623245	1.31034
KIF3C	77.1326	48.0725	303.086	374.747	0.623245	1.23644
GPATCH11	99.8187	62.2758	134.301	119.089	0.623889	0.886727
SMPDL3A	71.6879	44.7949	578.948	280.787	0.624859	0.484996
LNP1	166.062	103.793	457.351	267.677	0.625026	0.585276
CPEB3	94.374	58.9981	500.001	1158.11	0.625152	2.31622
PACRGL	164.247	102.7	469.148	453.411	0.62528	0.966458
NRIP1	351.18	219.604	2841.2	1843.14	0.625332	0.64872
ATP5F1A	300.363	187.92	521.779	831.436	0.625642	1.59346
C16orf71	111.615	69.9237	38.1126	54.6279	0.62647	1.43333
SECTM1	66.2433	41.5172	106.171	221.789	0.626738	2.08899
PLOD1	285.844	179.179	313.068	618.388	0.626843	1.97525
GPR137B	153.358	96.1451	659.711	711.255	0.626933	1.07813
EXT1	670.6	420.635	9059.9	10876.4	0.627251	1.2005
SMARCA2	127.042	79.7567	3298.55	4637.91	0.627798	1.40604
AVPI1	246.824	155.143	270.418	397.691	0.628557	1.47065
ZFP36L1	1341.2	843.455	3181.49	2026.69	0.628881	0.637026
SOGA1	138.839	87.4046	716.879	1790.7	0.629541	2.49791
GPATCH8	117.968	74.2939	1715.07	2454.98	0.629783	1.43142
SERPINI1	97.0963	61.1832	161.525	121.274	0.630129	0.750807
WTIP	192.378	121.274	732.306	1313.25	0.630395	1.79331
SMARCD3	95.2814	60.0907	446.462	601.999	0.630665	1.34838
AHDC1	321.235	203.216	1512.71	1757.93	0.632608	1.16211
UGDH	329.402	208.679	593.467	712.348	0.633508	1.20031
PLS3	86.207	54.6279	650.636	663.183	0.633683	1.01928
SUFU	327.587	207.586	820.328	1027	0.633683	1.25194
LOXL1	389.293	246.918	572.596	761.513	0.634273	1.32993
CCNG2	201.452	127.829	1215.07	526.613	0.634539	0.433403
TUBB6	519.964	329.952	1492.74	1696.74	0.634567	1.13666
HERC1	147.913	93.96	2263.16	2414.55	0.635238	1.06689
ARL1	130.672	83.0344	477.315	286.25	0.635443	0.599709
SEC24D	274.955	174.809	5431.04	2711.73	0.635774	0.499302
AACS	225.046	143.125	403.812	1005.15	0.635982	2.48916
MAN1A1	384.756	244.733	2255.9	1099.11	0.636074	0.487217
CTSA	190.563	121.274	266.788	305.916	0.636398	1.14666
WLS	252.269	160.606	2078.04	2654.92	0.636646	1.2776
NKAIN4	94.374	60.0907	142.468	145.31	0.636729	1.01995
LURAP1	61.7061	39.3321	111.615	92.8674	0.63741	0.83203
TRPC4AP	183.303	116.904	1607.08	2410.18	0.637761	1.49973
MEIS1	304.901	194.475	5750.46	2484.48	0.637832	0.432048
SEMA6C	272.233	173.717	107.986	219.604	0.638118	2.03364
THBS2	270.418	172.624	1422.87	1761.2	0.638361	1.23778
PCDHGC3	104.356	66.646	593.467	764.79	0.638642	1.28868
CACNB1	193.285	123.459	252.269	435.931	0.63874	1.72804
DSTYK	177.859	113.626	760.437	960.358	0.638855	1.2629
AL360181.3	232.305	148.588	626.135	1183.24	0.639623	1.88975
PAOX	232.305	148.588	89.8368	120.181	0.639623	1.33777
SSB	172.414	110.348	290.382	393.321	0.640019	1.3545
OSBPL5	283.122	181.365	752.27	1667.24	0.640588	2.21628
MAP1LC3B	642.469	411.894	314.882	869.676	0.641111	2.76191
ANXA1	235.028	150.773	1025.41	923.211	0.641512	0.900334
ATP11C	122.505	78.6642	723.232	955.988	0.642132	1.32183
SEC14L2	79.8549	51.3502	548.095	648.979	0.643044	1.18406
PRDX6	222.323	143.125	343.921	340.878	0.64377	0.991153
RB1	117.06	75.3865	3353	3087.57	0.643998	0.920838
GVQW3	103.448	66.646	233.213	184.642	0.644244	0.791733
NBPF14	167.877	108.163	2536.3	2961.92	0.644301	1.16781
AC239811.1	167.877	108.163	1470.06	1236.78	0.644301	0.841311
BCL2L11	372.959	240.363	646.099	1019.36	0.644475	1.57771
MSX2	140.654	90.6823	137.024	83.0344	0.644721	0.605985
ATP5IF1	316.697	204.308	240.472	213.049	0.645122	0.88596
ARMH1	88.0219	56.813	183.303	181.365	0.645442	0.989423
PSAP	326.679	210.864	892.016	1663.97	0.645476	1.8654
BICC1	213.249	137.662	13635.2	4583.28	0.645547	0.336135
DSEL	199.637	128.922	480.944	378.025	0.64578	0.786005
GALK1	111.615	72.1088	153.358	292.805	0.646047	1.9093
EFS	233.213	150.773	380.218	410.802	0.646504	1.08044
TMEM131L	147.006	95.0525	968.241	763.698	0.646591	0.788748
IMPDH1	168.784	109.256	235.935	446.856	0.64731	1.89398
DOK4	119.782	77.5716	154.265	143.125	0.647604	0.927786
TMEM98	155.173	100.515	506.353	353.989	0.647764	0.699095
PPFIBP2	70.7805	45.8874	539.928	620.573	0.648306	1.14936
EHD2	848.459	550.649	899.275	1599.5	0.648999	1.77866
LHFPL6	208.712	135.477	1390.2	1695.65	0.649111	1.21971
FAT1	208.712	135.477	4368.43	2779.47	0.649111	0.636263
SERPINB9	196.915	127.829	117.968	72.1088	0.64916	0.61126
CFAP20	228.675	148.588	208.712	240.363	0.649776	1.15165
PNRC1	591.652	384.58	548.095	724.366	0.650011	1.32161
MAP3K1	136.116	88.4972	881.126	890.435	0.650158	1.01056
ALDOA	471.87	307.009	515.427	606.37	0.650621	1.17644
BMF	100.726	65.5535	339.383	403.154	0.650809	1.1879
LASP1	417.423	272.047	1281.31	1990.64	0.651729	1.5536
GIT2	150.635	98.3302	784.03	1067.43	0.652769	1.36146
BAG3	327.587	214.141	613.431	1095.84	0.653694	1.7864
FSCN1	1261.34	824.881	560.799	570.315	0.653969	1.01697
SYTL2	365.699	239.27	578.948	406.431	0.654281	0.702017
PEX3	71.6879	46.98	343.013	331.045	0.65534	0.965109
TWSG1	153.358	100.515	682.397	479.633	0.65543	0.702865
FBXO5	173.321	113.626	378.403	485.096	0.655579	1.28195
ARMCX3	131.579	86.3121	186.026	140.94	0.655971	0.757637
CTSO	141.561	92.8674	399.275	163.884	0.656024	0.410453
IKZF5	191.47	125.644	249.547	303.731	0.656207	1.21713
TLE1	201.452	132.199	1029.95	1328.55	0.656233	1.28992
MIR1915HG	109.801	72.1088	176.044	170.439	0.656726	0.968162
BZW2	377.496	248.011	564.429	534.261	0.656989	0.946551
GDE1	303.993	199.938	222.323	266.584	0.657706	1.19908
FUT8	194.193	127.829	3343.02	2513.98	0.65826	0.752008
SMOX	565.337	372.562	175.136	763.698	0.659009	4.36059
AHNAK	733.213	484.003	2785.85	3145.47	0.660112	1.12909
PDLIM7	489.111	323.397	427.405	982.209	0.661193	2.29807
OSR1	209.619	138.755	161.525	104.886	0.661938	0.649347
KLHL21	1047.19	693.774	637.932	1167.94	0.662511	1.83083
QKI	260.436	172.624	4443.75	3542.07	0.662828	0.797092
ADM	1219.6	808.493	1578.95	1446.55	0.662915	0.916145
ZNF584	169.692	112.533	372.051	546.279	0.663164	1.46829
CCDC115	88.9293	58.9981	99.8187	110.348	0.663427	1.10549
RRBP1	473.685	314.657	1791.29	3023.11	0.664274	1.68767
LDHA	568.966	378.025	1208.71	1175.59	0.664407	0.972598
RARA	192.378	127.829	541.743	1136.26	0.66447	2.09741
MKNK1	279.492	185.735	362.977	615.11	0.664544	1.69463
MAGI3	95.2814	63.3683	956.444	951.618	0.665065	0.994954
ACVR2A	190.563	126.737	3487.3	801.937	0.665065	0.229959
POGLUT1	129.764	86.3121	189.655	223.974	0.665145	1.18095
ZSWIM3	93.4666	62.2758	119.782	201.031	0.66629	1.6783
ASXL1	101.634	67.7386	1390.2	1905.42	0.666498	1.37061
KITLG	203.267	135.477	1855.72	1403.94	0.666498	0.756546
SH2D4A	65.3358	43.7023	937.388	1352.59	0.668887	1.44293
CDK5	98.0038	65.5535	33.5754	46.98	0.668887	1.39924
RIPK1	427.405	286.25	1003.63	1518.66	0.669739	1.51316
COLEC12	135.209	90.6823	2202.36	2122.84	0.670683	0.963892
TSPAN5	211.434	142.032	3057.17	2394.89	0.671758	0.783366
TLCD1	125.227	84.1269	308.53	184.642	0.671795	0.598457
LMCD1	164.247	110.348	2935.58	1779.78	0.671844	0.606278
USP46	146.098	98.3302	496.371	645.702	0.673042	1.30084
MICALL2	306.716	206.493	251.362	301.546	0.673241	1.19965
SLC44A1	129.764	87.4046	1245.92	943.97	0.673565	0.75765
FBLN2	314.882	213.049	1460.07	876.231	0.676598	0.600128
CSF1	219.601	148.588	412.886	951.618	0.676626	2.30479
ARL4A	109.801	74.2939	68.9656	48.0725	0.676626	0.697051
BCL3	232.305	157.328	262.251	470.892	0.677248	1.79558
ABI3BP	58.0763	39.3321	881.126	844.547	0.677248	0.958486
ANKRA2	116.153	78.6642	294.011	205.401	0.677248	0.698615
SLC41A1	311.253	210.864	155.173	437.023	0.677468	2.81637
PGRMC1	209.619	142.032	325.772	166.069	0.677574	0.50977
FZD4	332.124	225.067	113.43	100.515	0.677659	0.886142
SALL1	166.062	112.533	623.413	589.981	0.677659	0.946373
BHLHE40	323.957	219.604	474.592	670.83	0.677881	1.41349
ROR1	77.1326	52.4428	2618.88	1639.93	0.679904	0.626195
DAB2	284.029	193.383	2832.13	2293.28	0.680854	0.809737
C9	284.029	193.383	4303.09	3268.93	0.680854	0.759671
MYLIP	2011.8	1371.16	511.797	320.119	0.681559	0.625481
HSPB8	54.4465	37.147	108.893	257.844	0.682265	2.36786
LTBP3	60.7986	41.5172	163.34	431.56	0.682864	2.6421
TMEM8B	100.726	68.8311	382.033	452.319	0.68335	1.18398
ARMCX6	73.5028	50.2577	62.6135	68.8311	0.683751	1.0993
PRKD1	79.8549	54.6279	1458.26	2131.58	0.684089	1.46173
SEMA5A	390.2	267.677	15176.1	3822.86	0.685998	0.251901
ACSS2	168.784	115.811	238.657	400.969	0.686149	1.6801
LAMA5	154.265	105.978	96.1889	391.136	0.686986	4.06633
ASAP3	243.195	167.161	665.155	428.283	0.687356	0.643884
SARNP	152.45	104.886	1023.59	2051.82	0.687998	2.00453
ATP2B4	101.634	69.9237	1871.15	2205.87	0.687998	1.17889
AC013394.1	616.153	423.912	6122.51	6030.92	0.687998	0.98504
EHMT2	95.2814	65.5535	156.988	263.306	0.687998	1.67724
FAM220A	228.675	157.328	196.008	267.677	0.687998	1.36564
AC009412.1	228.675	157.328	196.008	267.677	0.687998	1.36564
ELMSAN1	99.8187	68.8311	860.255	1165.76	0.689562	1.35513
NFKBIA	669.692	462.152	362.977	503.669	0.690096	1.38761
GSTM1	61.7061	42.6097	126.134	102.7	0.690528	0.814214
KIAA0513	153.358	105.978	285.844	780.086	0.691051	2.72906
STAT3	153.358	105.978	1386.57	1445.45	0.691051	1.04247
PIAS3	153.358	105.978	264.973	233.807	0.691051	0.882381
RAD9A	140.654	97.2376	496.371	809.585	0.691327	1.63101
LCA5L	134.301	92.8674	148.821	132.199	0.691485	0.888315
TMEM263	304.901	210.864	1568.06	632.591	0.691582	0.403423
AGBL5	1663.34	1150.46	232.305	369.284	0.691658	1.58965
ITM2B	371.144	256.751	1034.48	818.326	0.691783	0.791047
CLCN2	121.597	84.1269	78.04	159.513	0.691849	2.04399
ABCD1	115.245	79.7567	78.04	272.047	0.692061	3.48599
NUFIP2	950.092	657.72	1681.49	3306.08	0.692269	1.96616
BAZ2B	108.893	75.3865	3840.3	2387.24	0.692298	0.621629
SMIM4	342.106	237.085	756.807	774.623	0.693017	1.02354
HMG20B	119.782	83.0344	55.354	161.699	0.69321	2.92117
NHS	113.43	78.6642	1689.66	1334.01	0.693502	0.789517
HEBP1	77.1326	53.5353	268.603	331.045	0.694069	1.23247
WRAP73	135.209	93.96	93.4666	388.951	0.694924	4.16139
FBXO17	111.615	77.5716	338.476	475.263	0.69499	1.40412
ARHGEF17	105.263	73.2014	949.185	1437.81	0.695412	1.51478
MARC2	105.263	73.2014	122.505	127.829	0.695412	1.04346
FCHSD1	92.5591	64.4609	103.448	251.288	0.69643	2.42912
DEGS1	308.53	215.234	232.305	402.061	0.69761	1.73075
SPTLC2	142.468	99.4227	1668.79	1500.08	0.697858	0.898906
RBMS1	168.784	117.996	9150.65	5539.27	0.699095	0.605342
LOXL2	123.412	86.3121	472.777	1654.13	0.699381	3.49875
APCDD1	190.563	133.292	944.647	490.558	0.699465	0.519303
TBC1D10A	236.842	166.069	258.621	357.266	0.701178	1.38143
CISH	115.245	80.8493	45.3721	62.2758	0.701541	1.37256
MARVELD1	263.158	184.642	485.482	376.932	0.70164	0.776409
CRTC1	137.024	96.1451	407.442	1325.27	0.701667	3.25267
SEPT11	522.687	367.099	4751.37	2876.7	0.702331	0.605448
AC027644.4	287.659	202.123	3214.16	5541.45	0.702648	1.72407
KCTD7	287.659	202.123	245.917	359.451	0.702648	1.46168
FKBP9	244.102	171.532	1116.15	1224.76	0.702704	1.0973
SHC1	449.184	315.749	295.826	529.89	0.70294	1.79122
PKP4	135.209	95.0525	2577.14	2040.9	0.703005	0.791925
ARID4B	248.639	174.809	3428.32	4407.38	0.703064	1.28558
SGO2	113.43	79.7567	240.472	379.118	0.703134	1.57655
SERINC4	102.541	72.1088	31.7605	54.6279	0.703219	1.72
PKIB	80.7624	56.813	177.859	136.57	0.703459	0.767855
PHLDA3	392.923	276.417	268.603	349.618	0.70349	1.30162
PXDN	336.661	237.085	1115.25	1943.66	0.704225	1.74281
FOXO1	323.957	228.345	754.085	1734.98	0.704861	2.30078
DKK1	858.44	605.277	2472.78	2041.99	0.705089	0.825787
BAMBI	401.09	282.972	111.615	107.071	0.705509	0.959282
OSBPL8	346.643	244.733	3031.76	2683.32	0.706009	0.885069
PDXK	276.77	195.568	628.858	1856.26	0.706608	2.95179
CDR2L	514.52	363.822	172.414	222.882	0.707109	1.29271
EVA1B	129.764	91.7748	67.1507	137.662	0.707243	2.05005
SCP2	217.786	154.051	1098.01	928.674	0.707348	0.845783
PPM1H	77.1326	54.6279	445.554	765.883	0.708233	1.71894
CD302	61.7061	43.7023	372.051	210.864	0.708233	0.566759
SIDT2	127.949	90.6823	137.024	279.695	0.708736	2.04121
SHF	951	674.108	2186.03	1787.42	0.708842	0.817658
C11orf1	97.0963	68.8311	147.913	207.586	0.708895	1.40343
SLIT2	428.313	303.731	8968.25	6504	0.709134	0.725224
EPB41L2	132.487	93.96	1316.7	1495.71	0.709204	1.13596
CH25H	126.134	89.5897	130.672	72.1088	0.710272	0.551832
EPAS1	462.796	328.86	1113.43	2390.52	0.710594	2.14698
CKAP4	150.635	107.071	359.347	479.633	0.710793	1.33473
MAN2A1	95.2814	67.7386	1844.83	1803.81	0.710931	0.977766
SLC30A1	440.11	313.564	582.578	559.39	0.712468	0.960197
TSC22D4	275.862	196.66	208.712	477.448	0.712893	2.28759
STARD3	211.434	150.773	127.949	446.856	0.713097	3.49244
S100A10	142.468	101.608	364.792	385.673	0.713196	1.05724
SPSB1	549.91	392.228	653.358	1936.01	0.713259	2.96317
TMSB4X	485.482	346.341	611.616	688.311	0.713396	1.1254
PRCP	122.505	87.4046	330.309	274.232	0.71348	0.830229
ENPP1	269.51	192.29	547.188	347.433	0.71348	0.634944
SAFB2	341.198	243.64	469.148	1341.66	0.714073	2.85978
PSTPIP2	131.579	93.96	235.028	351.804	0.714095	1.49686
CADM1	379.311	270.954	908.35	874.046	0.714333	0.962235
NEIL2	120.69	86.3121	124.32	162.791	0.715156	1.30946
SLC38A2	887.479	634.776	4264.98	6023.27	0.715258	1.41226
ELOVL4	96.1889	68.8311	161.525	132.199	0.715583	0.818447
MORF4L2	163.34	116.904	802.179	722.181	0.715709	0.900274
TRPS1	67.1507	48.0725	5753.18	3201.19	0.71589	0.556421
PEAK1	262.251	187.92	6509.99	4282.83	0.716566	0.657885
RBM5	161.525	115.811	964.611	1645.39	0.716987	1.70576
TMEM14C	170.599	122.366	239.565	276.417	0.717275	1.15383
ADH5	357.532	256.751	1033.58	666.46	0.71812	0.64481
CAMK2G	103.448	74.2939	316.697	489.466	0.718174	1.54553
DUSP7	328.494	235.992	235.935	419.542	0.718407	1.77821
TSNAX-DISC1	168.784	121.274	1365.7	1301.24	0.718514	0.952797
TSNAX	168.784	121.274	620.691	549.557	0.718514	0.885395
TTC39C	117.06	84.1269	2399.28	1385.36	0.718665	0.577408
PCGF3	177.859	127.829	803.994	1514.28	0.718712	1.88345
RUSC2	121.597	87.4046	1236.84	1849.7	0.718804	1.4955
DACT1	153.358	110.348	170.599	166.069	0.719548	0.973444
PRPSAP2	232.305	167.161	765.881	1030.28	0.719576	1.34522
KLHL24	329.402	237.085	1201.45	1391.92	0.719745	1.15853
LAMB1	166.969	120.181	1928.31	892.62	0.719781	0.462901
ZMAT3	115.245	83.0344	2441.93	1375.53	0.720502	0.563297
LDB1	137.931	99.4227	800.364	851.102	0.720814	1.06339
SPTAN1	484.574	349.618	1403.81	2046.36	0.721496	1.45772
P4HA1	287.659	207.586	2625.23	1295.77	0.721638	0.493585
IER5L	1112.52	803.03	707.805	482.91	0.721809	0.682265
TAX1BP3	464.61	335.415	365.699	505.854	0.721928	1.38325
PPFIBP1	149.728	108.163	1462.8	2309.67	0.722398	1.57894
SNX16	95.2814	68.8311	410.164	386.765	0.722398	0.942953
VSTM4	95.2814	68.8311	549.003	387.858	0.722398	0.706477
GLIPR1L2	63.521	45.8874	80.7624	42.6097	0.722398	0.527594
SAT1	186.026	134.385	51.7242	83.0344	0.722398	1.60533
FAM114A1	202.36	146.403	3026.32	1555.8	0.723478	0.51409
SEMA3C	184.211	133.292	9360.27	3115.97	0.723584	0.332894
ACOX1	166.062	120.181	452.814	655.535	0.723714	1.44769
MYOF	147.913	107.071	4140.66	4693.63	0.723875	1.13355
FLNB	407.442	294.991	795.827	1873.74	0.724007	2.35445
FKBP7	116.153	84.1269	196.008	54.6279	0.724279	0.278703
ZBTB20	107.078	77.5716	6452.82	2983.78	0.724439	0.462398
ZNF618	79.8549	57.9056	1347.55	1741.54	0.725134	1.29237
UNC79	79.8549	57.9056	255.899	227.252	0.725134	0.888054
GSPT2	75.3177	54.6279	39.9275	26.2214	0.725299	0.656726
ATP10D	203.267	147.495	1303.09	778.994	0.725623	0.597806
PHLDB3	100.726	73.2014	224.138	386.765	0.726737	1.72557
MAML3	96.1889	69.9237	864.793	1752.46	0.726941	2.02645
TSTD3	254.991	185.735	864.793	618.388	0.728397	0.715071
DPYD	107.986	78.6642	7298.56	3114.88	0.728469	0.42678
PLEKHO2	823.05	599.814	390.2	1011.71	0.72877	2.59279
AC069368.1	823.05	599.814	774.956	1843.14	0.72877	2.37839
TUBB3	938.295	683.941	176.044	375.84	0.728919	2.13492
ID1	303.993	221.789	55.354	114.719	0.729586	2.07245
IFFO1	145.191	105.978	302.178	650.072	0.729923	2.15129
PSPC1	170.599	124.552	2116.16	3282.04	0.730083	1.55095
RNASET2	110.708	80.8493	83.4847	126.737	0.730293	1.51808
ZNF652	106.171	77.5716	806.716	739.662	0.730631	0.916879
COL8A1	76.2252	55.7204	2177.86	1128.61	0.730998	0.51822
GSN	173.321	126.737	1359.35	1461.84	0.731223	1.0754
HNRNPH1	642.469	469.8	1165.16	1705.48	0.731241	1.46374
TRIP6	284.937	208.679	146.098	327.767	0.732367	2.24347
PTPRG	108.893	79.7567	6931.04	5594.99	0.732431	0.807236
CAMK2N1	363.884	266.584	170.599	160.606	0.732607	0.941423
BPNT1	125.227	91.7748	161.525	191.198	0.732868	1.1837
SKAP2	266.788	195.568	761.344	753.865	0.733046	0.990176
SLC17A5	99.8187	73.2014	867.515	656.627	0.733344	0.756906
DBP	78.9475	57.9056	228.675	226.159	0.733469	0.988997
RTL8C	211.434	155.143	55.354	68.8311	0.733766	1.24347
SSBP3	102.541	75.3865	1445.56	2194.95	0.735184	1.51841
HAS2	49.0019	36.0544	40.8349	148.588	0.735776	3.63875
ACO1	175.136	128.922	901.998	942.877	0.736122	1.04532
NMT2	329.402	242.548	432.85	626.036	0.736329	1.44631
NBEA	93.4666	68.8311	7558.99	3371.63	0.736425	0.446043
ATXN1	154.265	113.626	10543.6	7724.38	0.736563	0.732615
STX12	166.062	122.366	453.721	725.458	0.736872	1.59891
ZIC1	84.3921	62.2758	347.55	379.118	0.737934	1.09083
HEXIM1	741.38	547.371	517.242	481.818	0.738314	0.931513
MGMT	107.986	79.7567	962.796	1115.5	0.738586	1.15861
FZD7	403.812	298.268	389.293	338.693	0.738632	0.870021
HNRNPUL1	147.913	109.256	1062.61	2221.17	0.738648	2.09029
TBC1D4	91.6517	67.7386	784.938	913.378	0.739087	1.16363
GPNMB	235.028	173.717	1309.44	626.036	0.739133	0.478094
SAT2	242.287	179.179	39.02	54.6279	0.739534	1.4
JAM3	202.36	149.68	500.001	489.466	0.739675	0.97893
HSPA1B	986.39	729.829	148.821	189.012	0.739899	1.27007
CARD8	110.708	81.9418	619.783	819.418	0.740162	1.3221
GBF1	146.098	108.163	1556.26	2284.54	0.740346	1.46796
TCEAL9	157.895	116.904	109.801	79.7567	0.740389	0.726378
PAPSS1	205.082	151.866	1008.17	1031.37	0.740511	1.02302
ZNF703	492.741	364.914	317.605	515.687	0.74058	1.62368
EIF1AX	188.748	139.847	262.251	427.19	0.740921	1.62894
EDA2R	70.7805	52.4428	607.986	407.524	0.740921	0.670285
EFNB2	635.21	470.892	882.034	676.293	0.741318	0.766743
RLF	220.508	163.884	1510.89	1688	0.743208	1.11722
IL1R1	270.418	201.031	1433.76	812.863	0.743407	0.566945
JAK1	443.739	329.952	1732.31	2504.14	0.743573	1.44555
CEMIP2	524.502	390.043	2400.18	1457.47	0.743645	0.607233
RAP2B	477.315	355.081	1057.17	442.486	0.743914	0.418557
YPEL3	180.581	134.385	96.1889	113.626	0.744179	1.18128
PCM1	99.8187	74.2939	2441.93	2379.59	0.744289	0.974472
TMTC2	49.9093	37.147	1924.69	820.511	0.744289	0.426309
DLG2	199.637	148.588	791.29	543.001	0.744289	0.686223
GPSM1	195.1	145.31	439.202	1922.9	0.744798	4.37817
PCF11	571.689	426.097	2270.42	2377.41	0.745331	1.04712
ECH1	95.2814	71.0162	184.211	289.528	0.745331	1.57172
NFIX	140.654	104.886	2696.01	3453.57	0.745701	1.28099
FAM102B	64.4284	48.0725	344.828	209.771	0.746139	0.608335
ANKRD13D	143.376	107.071	245.009	446.856	0.746783	1.82383
MAP2K3	342.106	255.658	256.806	899.175	0.747308	3.50138
SCARF2	105.263	78.6642	133.394	289.528	0.747308	2.17047
IFITM1	375.681	280.787	68.9656	308.101	0.747409	4.46746
ARMCX5	59.8912	44.7949	70.7805	60.0907	0.747937	0.848972
RTL5	127.042	95.0525	49.9093	108.163	0.748198	2.16719
SNAP23	100.726	75.3865	821.235	941.785	0.74843	1.14679
NR1D1	223.231	167.161	245.009	508.039	0.748827	2.07355
FGFRL1	144.283	108.163	57.1689	221.789	0.749658	3.87955
EMX2	48.0944	36.0544	141.561	182.457	0.749658	1.28889
TTC5	103.448	77.5716	422.868	270.954	0.749858	0.640754
PARD6G	62.6135	46.98	196.008	320.119	0.750317	1.6332
LRIG1	187.841	140.94	1139.75	1430.16	0.750317	1.2548
FOXF2	311.253	233.807	368.422	568.13	0.751182	1.54206
RNFT1	135.209	101.608	121.597	124.552	0.751488	1.0243
TUBB	556.262	418.45	723.232	1637.74	0.752252	2.26448
LAMA3	72.5954	54.6279	1362.98	1890.12	0.752498	1.38676
ITPRIPL2	225.046	169.346	472.777	749.495	0.752498	1.5853
RHOB	828.495	623.85	234.12	581.241	0.752993	2.48266
LAMA4	176.951	133.292	4252.27	2961.92	0.75327	0.69655
UNC119B	194.193	146.403	207.804	340.878	0.753905	1.64038
CTU2	89.8368	67.7386	45.3721	194.475	0.754018	4.28623
AXDND1	75.3177	56.813	78.04	113.626	0.754311	1.456
MRFAP1	128.857	97.2376	101.634	249.103	0.754618	2.45099
REEP5	206.897	156.236	842.106	921.026	0.755138	1.09372
ZBTB47	153.358	115.811	682.397	1068.52	0.75517	1.56584
GLRX	99.8187	75.3865	242.287	272.047	0.755234	1.12283
NDUFC1	92.5591	69.9237	558.077	721.088	0.755449	1.29209
H1FX	1274.96	963.636	225.046	316.842	0.755819	1.4079
KIF26A	78.04	58.9981	94.374	387.858	0.755998	4.1098
ZCWPW1	219.601	166.069	450.091	617.295	0.756229	1.37149
C16orf70	109.801	83.0344	281.307	591.074	0.756229	2.10117
EEF1A1	1125.23	851.102	2588.93	3822.86	0.756382	1.47662
ZNF224	88.0219	66.646	290.382	335.415	0.757153	1.15508
GLS	936.48	709.07	6143.38	2698.62	0.757165	0.439272
EEPD1	112.523	85.2195	342.106	457.782	0.757353	1.33813
RPS8	330.309	250.196	181.488	289.528	0.75746	1.5953
EAF2	105.263	79.7567	73.5028	74.2939	0.757688	1.01076
PLSCR3	49.0019	37.147	64.4284	64.4609	0.758072	1.0005
MYO1D	156.988	119.089	3528.14	1745.91	0.758588	0.494853
HHLA3	191.47	145.31	253.176	145.31	0.758917	0.573948
NAP1L1	208.712	158.421	1822.14	2471.37	0.759041	1.3563
NCOA7	152.45	115.811	1944.65	3008.9	0.759665	1.54727
CCDC6	172.414	131.107	999.094	1295.77	0.760419	1.29695
CAVIN3	350.273	266.584	357.532	349.618	0.761076	0.977865
FNTB	61.7061	46.98	605.264	680.663	0.761351	1.12457
NDUFS4	123.412	93.96	1792.2	1554.71	0.761351	0.867487
TTC12	106.171	80.8493	614.338	808.493	0.761502	1.31604
NANS	407.442	310.286	263.158	458.874	0.761548	1.74372
FARP2	266.788	203.216	828.495	1255.35	0.761712	1.51522
BTBD19	118.875	90.6823	300.363	821.603	0.762838	2.73536
COL8A2	64.4284	49.1651	81.6698	201.031	0.763097	2.4615
ZNF440	193.285	147.495	148.821	231.622	0.763097	1.55639
ANGPTL2	267.695	204.308	698.731	1126.43	0.763212	1.6121
HILPDA	111.615	85.2195	49.0019	33.8693	0.76351	0.691183
GDPGP1	131.579	100.515	91.6517	148.588	0.763915	1.62122
AC091167.7	131.579	100.515	276.77	261.121	0.763915	0.94346
SLC26A2	94.374	72.1088	274.048	341.971	0.764075	1.24785
NXN	141.561	108.163	1662.43	3633.85	0.764075	2.18586
TRNP1	407.442	311.379	519.964	583.426	0.76423	1.12205
ZFP36	989.112	756.05	509.075	601.999	0.764372	1.18254
DAG1	171.507	131.107	612.524	1276.11	0.764442	2.08336
YIPF3	134.301	102.7	162.432	244.733	0.764701	1.50668
SPOCK1	77.1326	58.9981	2353	2362.11	0.764892	1.00387
ARHGEF3	77.1326	58.9981	1354.81	1277.2	0.764892	0.942714
SPTBN1	184.211	140.94	2145.19	3362.89	0.765101	1.56764
ZDHHC9	89.8368	68.8311	310.345	376.932	0.76618	1.21456
CBR4	169.692	130.014	952.814	903.545	0.76618	0.948291
CAMK1D	112.523	86.3121	1370.24	2984.87	0.767062	2.17836
FLRT2	195.1	149.68	2333.03	1898.87	0.767198	0.813904
LPAR1	82.5773	63.3683	4465.52	4250.05	0.767383	0.951747
SEMA4D	72.5954	55.7204	378.403	989.857	0.767548	2.61588
JDP2	135.209	103.793	611.616	2164.36	0.767649	3.53875
SESN1	52.6317	40.4246	949.185	912.286	0.768067	0.961126
GRN	305.808	234.9	127.042	380.21	0.768129	2.99279
PHIP	75.3177	57.9056	3484.58	3230.69	0.768817	0.92714
AC242842.3	528.131	406.431	4058.08	4813.81	0.769565	1.18623
AC242843.1	528.131	406.431	2257.72	1965.51	0.769565	0.870575
TRIQK	55.354	42.6097	1139.75	434.838	0.769768	0.381521
MARCKSL1	656.988	505.854	67.1507	114.719	0.769959	1.70837
CNKSR3	158.802	122.366	2111.62	966.914	0.770558	0.457902
LRP1	148.821	114.719	2005.45	2910.57	0.770852	1.45133
PDCD4	368.422	284.065	1117.97	842.362	0.771032	0.753475
FBXO9	174.229	134.385	813.976	597.629	0.77131	0.73421
SMYD3	151.543	116.904	2099.82	2736.86	0.771423	1.30338
GFOD2	128.857	99.4227	202.36	417.357	0.771575	2.06245
CCDC36	70.7805	54.6279	189.655	205.401	0.771793	1.08302
CREBBP	166.969	128.922	3119.79	4681.61	0.772128	1.50062
TMEM253	60.7986	46.98	49.0019	38.2395	0.772714	0.780368
ATP2A2	433.757	335.415	1828.5	3334.49	0.773278	1.82362
KIRREL1	175.136	135.477	2210.53	2564.23	0.773552	1.16001
TKT	403.812	312.471	1401.09	1713.13	0.773805	1.22271
DYNLL1	759.529	587.796	304.901	175.902	0.773895	0.576915
DNMT3A	101.634	78.6642	972.778	2178.56	0.773998	2.23952
CCDC85C	127.042	98.3302	145.191	591.074	0.773998	4.07101
LRRC20	114.338	88.4972	176.044	320.119	0.773998	1.81841
KDM5B	246.824	191.198	2393.83	1672.71	0.77463	0.698756
FOS	720.509	558.297	71.6879	121.274	0.774864	1.69169
AC005747.1	78.9475	61.1832	1047.19	2013.58	0.774986	1.92285
PPP2R5D	201.452	156.236	167.877	253.473	0.775548	1.50988
POLR2A	2362.98	1833.31	817.606	1135.17	0.775847	1.3884
RIDA	245.009	190.105	174.229	97.2376	0.775909	0.558103
TMED3	137.931	107.071	767.696	747.309	0.776261	0.973444
CDIPT	97.0963	75.3865	94.374	149.68	0.776409	1.58603
CCNK	237.75	184.642	616.153	1080.54	0.776624	1.75369
GDF5	140.654	109.256	108.893	213.049	0.776772	1.95649
TMEM131	233.213	181.365	2766.79	3114.88	0.777679	1.12581
TMEM14A	146.098	113.626	84.3921	55.7204	0.777737	0.660256
CTSH	58.9838	45.8874	102.541	157.328	0.777967	1.5343
PPP2R3A	74.4103	57.9056	1705.08	1291.4	0.778193	0.757384
RPS12	685.119	533.168	324.864	408.617	0.778213	1.25781
TOMM70	107.986	84.1269	772.233	833.622	0.779057	1.07949
NRP2	138.839	108.163	334.846	831.436	0.779057	2.48304
HDLBP	293.104	228.345	1437.39	2459.35	0.779057	1.71098
GAS2	61.7061	48.0725	156.08	181.365	0.779057	1.162
PELI2	169.692	132.199	1225.05	1263	0.779057	1.03098
NATD1	249.547	194.475	153.358	385.673	0.779314	2.51486
PGM2	203.267	158.421	156.08	427.19	0.779373	2.73699
WDCP	156.988	122.366	134.301	203.216	0.779466	1.51313
AC005258.1	744.103	580.148	648.821	2436.4	0.779661	3.75512
OAZ1	744.103	580.148	195.1	673.016	0.779661	3.44959
OS9	144.283	112.533	188.748	351.804	0.779948	1.86388
RNF103-CHMP3	309.438	241.455	1274.96	1696.74	0.780303	1.33082
RNF103	309.438	241.455	463.703	552.834	0.780303	1.19222
TMEM232	49.0019	38.2395	498.186	257.844	0.780368	0.517565
ABHD1	33.5754	26.2214	0.907442	7.6479	0.780971	8.42798
CPOX	100.726	78.6642	186.026	158.421	0.780971	0.851608
H3F3B	816.698	638.054	663.34	1197.44	0.78126	1.80517
SLC2A10	121.597	95.0525	881.126	522.243	0.781699	0.592699
UBE2B	191.47	149.68	807.624	1112.22	0.781742	1.37716
CDKN1A	968.241	757.142	1475.5	2185.12	0.781977	1.48093
CCDC69	106.171	83.0344	53.5391	75.3865	0.782083	1.40806
MVD	163.34	127.829	138.839	262.214	0.782598	1.88862
WNK1	308.53	241.455	3111.62	4009.69	0.782598	1.28862
OGT	127.042	99.4227	851.181	2198.23	0.782598	2.58256
RCC1	688.749	539.723	2991.84	6335.74	0.783629	2.11768
CTNND1	96.1889	75.3865	890.201	1185.43	0.783734	1.33164
SYS1-DBNDD2	78.04	61.1832	389.293	597.629	0.783998	1.53517
SYS1	78.04	61.1832	238.657	329.952	0.783998	1.38254
UBXN2A	234.12	183.55	935.573	1439.99	0.783998	1.53915
RIC1	494.556	387.858	3441.02	2094.43	0.784255	0.608666
GADD45B	1214.16	952.71	147.913	344.156	0.784668	2.32674
PABPC5	104.356	81.9418	54.4465	36.0544	0.785215	0.662198
SOCS3	733.213	575.778	315.79	379.118	0.78528	1.20054
SLC10A3	255.899	201.031	27.2233	66.646	0.785587	2.44813
PSME1	86.207	67.7386	43.5572	88.4972	0.785766	2.03174
COL6A3	329.402	258.936	4511.8	6559.72	0.786081	1.4539
SIX4	154.265	121.274	705.99	686.126	0.786139	0.971864
ARID5A	557.17	438.116	209.619	620.573	0.786324	2.96048
SH3BP1	68.0582	53.5353	48.0944	140.94	0.786611	2.93048
Z83844.3	68.0582	53.5353	345.736	724.366	0.786611	2.09514
SIPA1L1	327.587	257.844	3526.32	3255.82	0.7871	0.923291
ZNF70	117.968	92.8674	105.263	152.958	0.787229	1.4531
WSB1	490.926	386.765	984.575	1006.25	0.787828	1.02201
FN1	357.532	281.88	3451.91	2226.63	0.788404	0.645044
TDRD3	205.082	161.699	1366.61	1173.41	0.788458	0.858627
SLC2A13	105.263	83.0344	871.145	1224.76	0.788826	1.40592
PTGR1	52.6317	41.5172	499.093	673.016	0.788826	1.34848
SYPL2	55.354	43.7023	88.0219	92.8674	0.789506	1.05505
LIMS1	511.797	404.246	1210.53	1870.46	0.789856	1.54516
NAT1	89.8368	71.0162	67.1507	71.0162	0.790503	1.05756
RC3H1	216.879	171.532	1798.55	1641.02	0.79091	0.912413
PPP1R3B	124.32	98.3302	385.663	363.822	0.790947	0.943367
USP5	156.08	123.459	301.271	617.295	0.790998	2.04897
TMCC2	63.521	50.2577	98.9112	149.68	0.791198	1.51328
RNF152	127.042	100.515	344.828	435.931	0.791198	1.2642
NBEAL1	132.487	104.886	1962.8	1840.96	0.791669	0.937926
COL6A1	578.041	457.782	362.977	1362.42	0.791954	3.75346
AC091021.1	241.38	191.198	1894.74	1613.71	0.792103	0.851678
PITPNC1	68.9656	54.6279	572.596	1849.7	0.792103	3.23037
IFT57	74.4103	58.9981	494.556	337.6	0.792876	0.682633
APOL2	188.748	149.68	342.106	502.577	0.793017	1.46907
RBM10	77.1326	61.1832	261.343	605.277	0.793221	2.31602
MAP2K1	231.398	183.55	693.286	1604.97	0.793221	2.31501
WTAP	385.663	305.916	1369.33	1661.78	0.793221	1.21357
MSMO1	119.782	95.0525	933.758	352.896	0.793543	0.377931
GLG1	202.36	160.606	1454.63	2220.08	0.793666	1.52621
WDR91	122.505	97.2376	196.008	279.695	0.793746	1.42696
MAMLD1	82.5773	65.5535	863.885	1115.5	0.793844	1.29126
ZNF540	42.6498	33.8693	61.7061	69.9237	0.794126	1.13317
AKR1C1	85.2996	67.7386	196.008	207.586	0.794126	1.05907
LRPAP1	386.57	307.009	169.692	547.371	0.794186	3.22568
SIX5	360.255	286.25	278.585	581.241	0.794577	2.0864
RBM43	90.7442	72.1088	303.993	328.86	0.794638	1.0818
SEC23A	90.7442	72.1088	1663.34	1069.61	0.794638	0.643051
ALDH3B1	136.116	108.163	453.721	640.239	0.794638	1.41108
ST5	149.728	119.089	2574.41	2131.58	0.795368	0.827987
HSPA1A	722.324	574.685	107.986	146.403	0.795606	1.35576
ZC3H6	163.34	130.014	851.181	697.052	0.795976	0.818923
SMPD1	166.062	132.199	49.9093	119.089	0.796085	2.3861
RHOD	56.2614	44.7949	79.8549	92.8674	0.796191	1.16295
MYL9	131.579	104.886	519.964	631.498	0.797129	1.2145
UFSP2	69.8731	55.7204	416.516	309.194	0.797452	0.742334
MEX3B	72.5954	57.9056	409.256	186.827	0.797648	0.456504
RESF1	150.635	120.181	539.021	676.293	0.797829	1.25467
ITK	83.4847	66.646	143.376	113.626	0.798302	0.792504
MAP1B	166.969	133.292	1775.86	4151.72	0.798302	2.33786
LNX2	99.8187	79.7567	292.196	402.061	0.799016	1.376
EML1	99.8187	79.7567	726.861	801.937	0.799016	1.10329
GLMP	107.986	86.3121	279.492	336.508	0.799292	1.204
PLAG1	110.708	88.4972	882.034	469.8	0.799375	0.532632
BAHCC1	226.861	181.365	301.271	1060.87	0.799454	3.52133
ERAP1	129.764	103.793	482.759	656.627	0.799858	1.36015
TMTC1	129.764	103.793	3831.22	2365.39	0.799858	0.617398
TRA2A	262.251	209.771	705.99	1106.76	0.799887	1.56767
FDPS	135.209	108.163	344.828	489.466	0.799971	1.41945
VPS11	137.931	110.348	139.746	286.25	0.800024	2.04836
ECI2	140.654	112.533	306.716	285.158	0.800075	0.929714
MTHFR	143.376	114.719	869.33	1098.02	0.800124	1.26307
POLR3D	162.432	130.014	314.882	524.428	0.800422	1.66547
CCNG1	162.432	130.014	480.037	222.882	0.800422	0.464301
ZNF592	227.768	182.457	546.28	1051.04	0.801066	1.92399
CCN2	508.168	407.524	264.973	394.413	0.801948	1.4885
CENPT	176.951	142.032	35.3903	117.996	0.802665	3.33415
RFXANK	103.448	83.0344	50.8168	136.57	0.802665	2.68749
TRAF5	103.448	83.0344	264.973	450.134	0.802665	1.69879
PLCD1	62.6135	50.2577	204.175	285.158	0.802665	1.39664
AP003419.1	81.6698	65.5535	1066.24	1325.27	0.802665	1.24293
CLCF1	81.6698	65.5535	417.423	500.391	0.802665	1.19876
ARMT1	119.782	96.1451	244.102	231.622	0.802665	0.948875
FAM8A1	100.726	80.8493	218.694	154.051	0.802665	0.704413
MAP4K5	187.841	150.773	2474.6	1691.28	0.802665	0.683457
NUDT6	59.8912	48.0725	299.456	182.457	0.802665	0.609295
RNF24	217.786	174.809	980.038	2035.43	0.802665	2.07689
C2	43.5572	34.9618	502.723	871.861	0.802665	1.73428
TMEM256	89.8368	72.1088	36.2977	50.2577	0.802665	1.3846
TCP11L1	68.0582	54.6279	661.525	832.529	0.802665	1.2585
TMEM256-PLSCR3	89.8368	72.1088	344.828	396.598	0.802665	1.15013
CLK4	168.784	135.477	699.638	643.516	0.802665	0.919785
VASH1	68.0582	54.6279	334.846	268.769	0.802665	0.802665
CCDC134	98.0038	78.6642	102.541	183.55	0.802665	1.79001
WDR37	95.2814	76.479	1196.01	1700.02	0.802665	1.42141
NCDN	254.084	204.308	219.601	470.892	0.804098	2.14431
UGCG	588.023	473.077	2611.62	2459.35	0.804523	0.941695
ETS2	385.663	310.286	490.019	869.676	0.804553	1.77478
HMGCS1	164.247	132.199	1840.29	527.705	0.804882	0.286751
SNX21	139.746	112.533	415.609	555.019	0.805271	1.33544
TMEM245	268.603	216.326	1558.08	1533.95	0.805376	0.984515
JTB	362.069	291.713	193.285	226.159	0.805682	1.17008
CD46	107.078	86.3121	801.272	687.219	0.806066	0.85766
PITX1	101.634	81.9418	100.726	211.956	0.806248	2.10428
DNAJA1	706.898	570.315	773.141	803.03	0.806786	1.03866
MOSPD2	85.2996	68.8311	460.981	488.373	0.806934	1.05942
SCN5A	156.988	126.737	215.064	592.166	0.807304	2.75344
POLH	468.24	378.025	441.924	655.535	0.807331	1.48336
NIN	154.265	124.552	832.125	936.322	0.807386	1.12522
GAREM1	74.4103	60.0907	469.148	750.587	0.807559	1.5999
MAFB	369.329	298.268	76.2252	90.6823	0.807595	1.18966
FAS	63.521	51.3502	930.128	477.448	0.808398	0.513314
PIAS1	254.084	205.401	2775.87	2533.64	0.808398	0.912739
NPTN	127.042	102.7	996.372	1716.41	0.808398	1.72266
KDSR	185.118	149.68	1137.03	1639.93	0.808566	1.4423
KIDINS220	179.674	145.31	2051.73	1509.91	0.808745	0.735924
HSD11B1L	58.0763	46.98	39.9275	98.3302	0.808935	2.46272
RASL11B	171.507	138.755	15.4265	24.0363	0.809035	1.55811
PI4K2B	110.708	89.5897	777.678	1113.32	0.809244	1.43159
HACE1	102.541	83.0344	800.364	806.308	0.809768	1.00743
PCNX2	49.9093	40.4246	2225.96	1503.36	0.809961	0.675377
MRPS6	482.759	391.136	1845.74	2864.69	0.810208	1.55205
SLC5A3	482.759	391.136	1205.99	1821.29	0.810208	1.51021
TMEM189	613.431	497.114	558.984	1200.72	0.810382	2.14804
TMEM189-UBE2V1	613.431	497.114	1533.58	2485.57	0.810382	1.62076
ADI1	141.561	114.719	514.52	576.87	0.810382	1.12118
MEX3C	225.046	182.457	670.6	747.309	0.810756	1.11439
CDC40	88.9293	72.1088	971.871	846.732	0.810855	0.87124
TPM1	172.414	139.847	766.789	1671.61	0.811114	2.18002
BTG1	686.934	557.204	929.221	1222.57	0.811147	1.3157
GLI3	164.247	133.292	3773.15	3522.41	0.811534	0.933546
YWHAG	612.524	497.114	976.408	1835.5	0.811583	1.87985
MAP3K20	80.7624	65.5535	2113.43	3050.42	0.811683	1.44335
TNFRSF10D	239.565	194.475	580.763	771.346	0.811786	1.32816
GPX1	264.973	215.234	107.078	238.178	0.812286	2.22433
ISCA1	256.806	208.679	312.16	432.653	0.812591	1.386
KDM3A	315.79	256.751	1566.25	1411.58	0.813044	0.901254
EVL	69.8731	56.813	1216.88	766.975	0.813089	0.63028
CCDC85B	342.106	278.602	35.3903	217.419	0.814375	6.14347
ISL2	398.367	324.49	171.507	388.951	0.814549	2.26785
DUSP19	89.8368	73.2014	68.9656	40.4246	0.814826	0.586156
SLC12A2	205.082	167.161	1186.03	645.702	0.815095	0.544424
LGMN	202.36	164.976	129.764	327.767	0.815262	2.52587
DNMBP	143.376	116.904	1751.36	1712.04	0.815365	0.977546
CHEK2	171.507	139.847	199.637	426.097	0.815405	2.13436
ITGAV	247.732	202.123	1330.31	682.849	0.815895	0.5133
MBD5	81.6698	66.646	4715.07	3220.86	0.816042	0.683099
MICU1	132.487	108.163	1973.69	2516.16	0.816409	1.27485
LITAF	445.554	363.822	1755.9	1773.22	0.81656	1.00986
ZBTB44	205.989	168.254	1066.24	962.543	0.816808	0.902741
MAP3K12	228.675	186.827	802.179	965.821	0.816998	1.204
PARVA	127.042	103.793	2811.26	3180.44	0.816998	1.13132
CFAP70	98.9112	80.8493	310.345	372.562	0.817392	1.20048
GSTK1	220.508	180.272	200.545	181.365	0.817529	0.90436
FOXF1	73.5028	60.0907	120.69	257.844	0.817529	2.13642
AMD1	732.306	598.722	714.157	1128.61	0.817584	1.58034
CAT	133.394	109.256	527.224	331.045	0.819045	0.627902
ATF4	568.059	465.43	517.242	862.028	0.819333	1.66659
AP4S1	65.3358	53.5353	230.49	308.101	0.819387	1.33672
ZFP36L2	378.403	310.286	1923.78	1340.57	0.819988	0.696842
RHOC	375.681	308.101	185.118	391.136	0.820114	2.1129
UBE2O	125.227	102.7	366.607	889.342	0.820114	2.42587
HSDL2	82.5773	67.7386	590.745	706.885	0.820306	1.1966
HIST1H2AC	960.074	787.734	1073.5	1299.05	0.820493	1.2101
VAT1	182.396	149.68	321.235	793.197	0.820635	2.46921
DAAM1	139.746	114.719	1093.47	1863.9	0.820907	1.70458
NBN	79.8549	65.5535	566.244	484.003	0.820907	0.854761
TENM4	99.8187	81.9418	2711.44	1387.55	0.820907	0.511739
CTSL	331.216	272.047	283.122	459.967	0.821357	1.62462
ZNF573	97.0963	79.7567	399.275	468.707	0.821418	1.1739
CABYR	774.048	635.869	163.34	179.179	0.821484	1.09697
FGF2	380.218	312.471	3031.76	4006.41	0.821821	1.32148
EPHB2	94.374	77.5716	496.371	1258.63	0.821959	2.53566
PRAG1	352.088	289.528	549.003	565.945	0.822317	1.03086
BPTF	237.75	195.568	2174.23	2493.22	0.822578	1.14671
C1RL	71.6879	58.9981	1104.36	1202.91	0.822985	1.08924
TGFB1	88.9293	73.2014	880.219	1328.55	0.823141	1.50934
ARHGAP21	264.066	217.419	3087.12	3559.55	0.823352	1.15303
RBBP7	157.895	130.014	325.772	570.315	0.823423	1.75066
ZNF625-ZNF20	86.207	71.0162	360.255	555.019	0.823787	1.54063
ZNF625	86.207	71.0162	114.338	159.513	0.823787	1.39511
AKAP9	103.448	85.2195	2028.13	1481.51	0.823787	0.730479
TESK2	68.9656	56.813	243.195	374.747	0.823787	1.54094
ZNF585B	68.9656	56.813	555.355	580.148	0.823787	1.04464
SOCS1	1098.01	904.638	124.32	339.785	0.823892	2.73316
MITD1	218.694	180.272	285.844	325.582	0.824313	1.13902
TUBA1B	601.634	496.021	445.554	878.416	0.824456	1.97151
HSPA8	429.22	353.989	594.375	1115.5	0.824725	1.87676
SRC	605.264	499.299	480.037	1315.44	0.824927	2.74029
PYGB	398.367	328.86	373.866	1139.54	0.825519	3.04798
RPS25	173.321	143.125	139.746	289.528	0.825778	2.07181
TMEM65	141.561	116.904	658.803	682.849	0.825818	1.0365
PLAUR	219.601	181.365	211.434	363.822	0.825882	1.72073
ACTR6	75.3177	62.2758	399.275	362.729	0.826841	0.90847
ALAD	89.8368	74.2939	112.523	168.254	0.826988	1.49529
PUS10	58.0763	48.0725	314.882	444.671	0.827748	1.41218
ANXA2	372.051	308.101	5168.79	5808.04	0.828115	1.12367
BLVRB	171.507	142.032	175.136	441.393	0.828146	2.52028
MTMR3	113.43	93.96	1499.09	2179.65	0.82835	1.45398
ZNF517	256.806	213.049	162.432	340.878	0.829609	2.09859
ZADH2	105.263	87.4046	1188.75	624.943	0.830343	0.525715
CDC42EP1	568.059	471.985	331.216	954.895	0.830873	2.883
INKA1	102.541	85.2195	18.1488	26.2214	0.831077	1.4448
RASD1	554.447	461.059	24.5009	73.2014	0.831566	2.9877
IFFO2	223.231	185.735	373.866	724.366	0.83203	1.9375
ACLY	244.102	203.216	781.308	1462.93	0.832503	1.87242
MCM9	120.69	100.515	1054.45	1107.85	0.83284	1.05065
PRPS1	70.7805	58.9981	116.153	186.827	0.833536	1.60846
MMP11	153.358	127.829	107.078	103.793	0.833536	0.969319
DUSP14	339.383	282.972	270.418	547.371	0.833784	2.02417
PXN	174.229	145.31	881.126	1979.71	0.834019	2.2468
GTF2B	138.839	115.811	734.121	791.012	0.834142	1.0775
KLHL25	115.245	96.1451	72.5954	267.677	0.834266	3.68724
HELZ2	218.694	182.457	82.5773	1193.07	0.834305	14.448
PAF1	68.0582	56.813	101.634	230.53	0.834771	2.26824
IFI27L1	56.2614	46.98	98.9112	189.012	0.83503	1.91093
REV3L	313.975	262.214	11238.7	5355.72	0.835142	0.476544
ERP44	278.585	232.715	1154.27	1620.26	0.835346	1.40372
MRPL48	44.4647	37.147	350.273	521.15	0.835426	1.48784
USP13	65.3358	54.6279	597.097	748.402	0.836109	1.2534
TRNAU1AP	184.211	154.051	258.621	598.722	0.836274	2.31505
SMAD7	303.086	253.473	813.068	1276.11	0.836309	1.5695
TPT1	508.168	425.005	1395.65	1908.7	0.836348	1.36761
COG6	86.207	72.1088	1715.97	733.106	0.836461	0.427225
FGGY	139.746	116.904	993.649	1063.06	0.836543	1.06985
DZIP1L	74.4103	62.2758	476.407	600.907	0.836925	1.26133
MKX	366.607	307.009	5376.6	4313.42	0.837433	0.802258
DNM3	41.7423	34.9618	620.691	706.885	0.837563	1.13887
OAT	379.311	317.934	421.053	425.005	0.838189	1.00939
TEC	131.579	110.348	256.806	339.785	0.838646	1.32312
BCL6	403.812	338.693	627.043	1233.5	0.838739	1.96717
MRNIP	110.708	92.8674	343.013	482.91	0.83885	1.40785
RAB1A	176.951	148.588	2463.71	3173.88	0.839711	1.28825
TSPAN14	147.006	123.459	646.099	1091.47	0.839825	1.68932
TIMM29	156.08	131.107	84.3921	149.68	0.839998	1.77363
B4GALT4	243.195	204.308	346.643	421.727	0.840102	1.2166
TAPBPL	126.134	105.978	243.195	278.602	0.840199	1.14559
PITHD1	531.761	446.856	117.06	221.789	0.840332	1.89466
MGAT1	276.77	232.715	584.393	1151.56	0.840824	1.97052
IRAK2	114.338	96.1451	155.173	756.05	0.840887	4.87231
KDM5C	114.338	96.1451	295.826	827.066	0.840887	2.79578
KLHL29	397.46	334.323	2605.27	3343.23	0.841148	1.28326
PAFAH2	66.2433	55.7204	252.269	408.617	0.841148	1.61977
MBD4	159.71	134.385	163.34	193.383	0.84143	1.18393
FBN1	323.049	272.047	7989.12	3790.08	0.842121	0.474405
ADGRB2	81.6698	68.8311	141.561	187.92	0.842798	1.32748
HERC3	54.4465	45.8874	401.997	762.605	0.842798	1.89704
KLHL15	272.233	229.437	322.142	464.337	0.842798	1.4414
ALG13	72.5954	61.1832	665.155	667.553	0.842798	1.0036
FBXO33	235.935	198.845	430.128	417.357	0.842798	0.97031
PPP3CA	90.7442	76.479	7006.36	2640.71	0.842798	0.376902
PIP5K1B	190.563	160.606	431.943	393.321	0.842798	0.910586
FEM1C	287.659	242.548	810.346	1104.58	0.843178	1.36309
RSRP1	463.703	391.136	351.18	537.538	0.843505	1.53066
HBEGF	203.267	171.532	11.7968	87.4046	0.843873	7.40921
RND3	1074.41	906.823	10446.5	15196.4	0.844018	1.45469
HS6ST1	313.068	264.399	519.964	1090.37	0.844543	2.09701
TTC31	60.7986	51.3502	107.078	173.717	0.844595	1.62233
ARHGAP10	127.949	108.163	2896.56	3501.65	0.845359	1.2089
MINDY2	118.875	100.515	619.783	748.402	0.845555	1.20752
DOCK1	109.801	92.8674	4373.87	6494.16	0.845783	1.48476
FAM122A	192.378	162.791	191.47	159.513	0.846205	0.833097
ECE1	473.685	400.969	1770.42	3780.25	0.846488	2.13523
NEK1	165.155	139.847	1235.03	1272.83	0.846767	1.03061
GDI2	214.156	181.365	1115.25	1425.79	0.846879	1.27845
SPTSSA	254.084	215.234	462.796	530.983	0.847098	1.14734
P3H4	98.0038	83.0344	267.695	362.729	0.847257	1.35501
SEMA3B	73.5028	62.2758	115.245	197.753	0.847257	1.71593
HNRNPK	275.862	233.807	1482.76	1875.92	0.84755	1.26515
AJUBA	322.142	273.139	595.282	938.507	0.847885	1.57658
TMEM43	104.356	88.4972	444.647	1116.59	0.848033	2.51119
HECTD2	205.989	174.809	1156.99	960.358	0.848632	0.83005
IRX3	55.354	46.98	92.5591	110.348	0.848719	1.19219
RAB23	362.977	308.101	1267.7	1053.23	0.848818	0.830818
BBX	156.988	133.292	3686.94	3297.34	0.849061	0.89433
NSDHL	86.207	73.2014	264.973	341.971	0.849135	1.29059
WASHC3	187.841	159.513	596.19	523.335	0.849196	0.8778
AC034102.1	194.193	164.976	437.387	857.658	0.849549	1.96087
COPB1	361.162	307.009	2357.54	2191.67	0.850058	0.929645
STX6	237.75	202.123	652.451	809.585	0.85015	1.24084
CITED2	1034.48	879.509	1267.7	1323.09	0.850191	1.04369
MFN1	114.338	97.2376	490.926	839.084	0.850442	1.70919
HOXA9	114.338	97.2376	174.229	112.533	0.850442	0.645894
FAM171A2	98.9112	84.1269	74.4103	164.976	0.85053	2.21712
EHHADH	120.69	102.7	167.877	146.403	0.850945	0.872084
CERS4	127.042	108.163	309.438	572.5	0.851398	1.85013
MTPAP	37.2051	31.6842	450.091	857.658	0.851608	1.90552
EMSY	74.4103	63.3683	1166.06	1436.71	0.851608	1.23211
CDHR3	96.1889	81.9418	1254.09	907.915	0.851885	0.723966
PHYH	102.541	87.4046	424.683	591.074	0.852387	1.3918
CPNE3	146.098	124.552	699.638	553.927	0.852519	0.791733
LMBR1L	115.245	98.3302	186.933	378.025	0.853226	2.02225
CD47	186.933	159.513	928.313	598.722	0.853318	0.644956
DZANK1	49.9093	42.6097	178.766	232.715	0.853743	1.30178
VAMP3	106.171	90.6823	199.637	321.212	0.854117	1.60898
TRIM62	84.3921	72.1088	133.394	180.272	0.854449	1.35143
NECTIN3	203.267	173.717	3072.6	1515.38	0.854623	0.493191
YAP1	194.193	166.069	3666.97	3860.01	0.855175	1.05264
MOB3C	103.448	88.4972	97.0963	142.032	0.855471	1.4628
ALDH3A2	156.988	134.385	303.993	319.027	0.856021	1.04945
TBPL1	182.396	156.236	637.932	611.832	0.856575	0.959087
ELL2	355.717	304.824	2732.31	3101.77	0.856926	1.13522
NUMBL	254.991	218.512	829.402	633.683	0.856937	0.764024
ERF	286.752	245.825	185.118	668.645	0.857276	3.61199
AC006486.1	286.752	245.825	736.843	1760.11	0.857276	2.38872
SLC25A16	198.73	170.439	311.253	614.017	0.857642	1.97273
SERINC1	132.487	113.626	975.501	922.119	0.857642	0.945278
ZBTB37	72.5954	62.2758	383.848	560.482	0.857848	1.46017
CSPP1	78.9475	67.7386	1072.6	1654.13	0.858021	1.54218
FAM168A	78.9475	67.7386	858.44	1311.07	0.858021	1.52727
TET2	85.2996	73.2014	1525.41	1282.66	0.858168	0.840864
HS2ST1	91.6517	78.6642	1428.31	1254.26	0.858295	0.878137
MLLT10	98.0038	84.1269	3832.13	4797.42	0.858405	1.25189
SGK3	104.356	89.5897	1478.22	1966.6	0.858502	1.33038
TMEM87B	123.412	105.978	953.722	840.177	0.858733	0.880945
DBI	161.525	138.755	114.338	161.699	0.859031	1.41422
CRBN	180.581	155.143	745.918	804.122	0.859133	1.07803
JUN	823.958	707.977	431.035	685.034	0.85924	1.58928
ELL	266.788	229.437	495.464	1493.53	0.859998	3.0144
APBB3	165.155	142.032	70.7805	105.978	0.859998	1.49728
CASP4	57.1689	49.1651	394.737	506.947	0.859998	1.28426
AF241726.2	114.338	98.3302	1317.61	1036.84	0.859998	0.78691
PRRG1	114.338	98.3302	769.511	518.965	0.859998	0.674409
RPUSD3	168.784	145.31	155.173	290.62	0.860922	1.87288
POU2F1	149.728	128.922	1638.84	1820.2	0.86104	1.11066
COX11	143.376	123.459	372.959	393.321	0.861086	1.0546
ACAA1	137.024	117.996	435.572	850.01	0.861137	1.95148
CASTOR2	137.024	117.996	297.641	561.575	0.861137	1.88675
ZNF765	124.32	107.071	362.069	592.166	0.861253	1.6355
PIK3R3	366.607	315.749	584.393	600.907	0.861275	1.02826
CEP83	117.968	101.608	783.123	1095.84	0.861321	1.39931
IFT27	105.263	90.6823	193.285	394.413	0.86148	2.04058
PDK2	79.8549	68.8311	178.766	308.101	0.861952	1.72349
C9orf43	207.804	179.179	101.634	168.254	0.862251	1.6555
BTBD2	108.893	93.96	220.508	560.482	0.862864	2.54177
MYO18A	48.0944	41.5172	712.342	1316.53	0.863243	1.84817
SCD	137.931	119.089	1127.04	1006.25	0.863392	0.892819
MLEC	179.674	155.143	166.969	310.286	0.863472	1.85834
SQOR	89.8368	77.5716	393.83	596.536	0.863472	1.51471
GALNT2	256.806	221.789	1616.15	2476.83	0.863644	1.53254
SMNDC1	83.4847	72.1088	516.335	652.257	0.863737	1.26324
WDR31	83.4847	72.1088	199.637	183.55	0.863737	0.919416
LYST	83.4847	72.1088	2423.78	1934.92	0.863737	0.798307
VANGL1	147.913	127.829	325.772	600.907	0.864219	1.84456
G6PD	141.561	122.366	156.08	300.453	0.864408	1.92499
SHLD1	70.7805	61.1832	262.251	395.506	0.864408	1.50812
IGF1R	70.7805	61.1832	6135.22	5794.93	0.864408	0.944535
FBN2	116.153	100.515	2731.4	4171.39	0.865373	1.5272
PATZ1	87.1145	75.3865	298.549	447.949	0.865373	1.50042
ITPKC	116.153	100.515	606.171	762.605	0.865373	1.25807
CREB3	138.839	120.181	59.8912	126.737	0.865619	2.11612
MFGE8	420.146	363.822	359.347	591.074	0.865942	1.64485
ZNF184	103.448	89.5897	269.51	217.419	0.866033	0.806718
PRDM1	51.7242	44.7949	1214.16	766.975	0.866033	0.631693
TMEM200A	51.7242	44.7949	1019.06	499.299	0.866033	0.489961
CAVIN1	375.681	325.582	818.513	1071.8	0.866645	1.30945
EPC1	68.0582	58.9981	3578.05	3427.35	0.866878	0.957884
PHF14	158.802	137.662	2165.16	1778.68	0.866878	0.821503
SCN11A	107.078	92.8674	109.801	123.459	0.867286	1.12439
RPS28	191.47	166.069	69.8731	169.346	0.867334	2.42363
CCDC130	123.412	107.071	644.284	1460.75	0.867586	2.26724
POLR2L	383.848	333.23	316.697	669.738	0.86813	2.11476
ARC	127.042	110.348	6.3521	17.4809	0.868598	2.75199
EMILIN1	88.0219	76.479	248.639	553.927	0.868864	2.22783
DCBLD2	490.019	426.097	1663.34	1922.9	0.869553	1.15605
STC1	189.655	164.976	167.877	372.562	0.869873	2.21926
POLD4	173.321	150.773	143.376	239.27	0.869903	1.66883
PTEN	278.585	242.548	6252.28	3962.71	0.870643	0.633802
RANBP9	351.18	305.916	2029.95	1767.76	0.871109	0.870839
ZBTB38	68.9656	60.0907	1929.22	2013.58	0.871313	1.04373
KATNAL2	302.178	263.306	460.981	618.388	0.871361	1.34146
AC008770.4	184.211	160.606	144.283	351.804	0.87186	2.43828
ZNF844	184.211	160.606	219.601	524.428	0.87186	2.38809
SETD2	141.561	123.459	2021.78	3031.85	0.872126	1.49959
TNFAIP3	141.561	123.459	489.111	458.874	0.872126	0.938179
PDCD7	177.859	155.143	251.362	419.542	0.872283	1.66908
TEFM	88.9293	77.5716	124.32	164.976	0.872283	1.32703
MORC4	82.5773	72.1088	454.629	933.044	0.873228	2.05232
PPDPF	195.1	170.439	29.0382	73.2014	0.873598	2.52087
OFD1	102.541	89.5897	245.917	399.876	0.873697	1.62606
SELENOM	264.973	231.622	66.2433	104.886	0.874135	1.58334
C11orf95	162.432	142.032	448.277	536.446	0.874411	1.19669
ST3GAL2	86.207	75.3865	690.564	1583.12	0.874482	2.2925
PHTF1	202.36	176.994	517.242	616.203	0.874652	1.19132
PPP6C	156.08	136.57	429.22	834.714	0.874998	1.94472
TRAFD1	215.971	189.012	411.071	553.927	0.875174	1.34752
PTPN13	255.899	223.974	4784.04	2779.47	0.875246	0.580988
AC124312.1	129.764	113.626	468.24	808.493	0.875634	1.72666
SNRPN	129.764	113.626	254.991	428.283	0.875634	1.6796
SNURF	129.764	113.626	251.362	418.45	0.875634	1.66473
CHD6	59.8912	52.4428	2897.46	3283.14	0.875634	1.13311
ZNF599	119.782	104.886	303.993	290.62	0.875634	0.956009
VMAC	69.8731	61.1832	29.0382	88.4972	0.875634	3.04762
AC104532.1	69.8731	61.1832	80.7624	231.622	0.875634	2.86795
ABHD4	99.8187	87.4046	349.365	586.703	0.875634	1.67934
CLSTN1	143.376	125.644	505.445	934.137	0.876327	1.84815
MYPOP	123.412	108.163	98.9112	192.29	0.876439	1.94407
GALNT10	443.739	388.951	867.515	1309.98	0.876529	1.51003
SQSTM1	704.175	617.295	2028.13	4303.58	0.876621	2.12194
C12orf73	176.951	155.143	1062.61	882.787	0.876757	0.830768
EVC	166.969	146.403	1333.03	2397.07	0.876824	1.79821
TMEM106A	73.5028	64.4609	189.655	336.508	0.876985	1.77431
TP53BP2	197.822	173.717	974.593	1629	0.878144	1.67147
PTGES	110.708	97.2376	101.634	231.622	0.878326	2.27899
AC253536.7	67.1507	58.9981	233.213	311.379	0.878592	1.33517
CDK17	134.301	117.996	2872.05	2496.49	0.878592	0.869236
RBMX	325.772	286.25	1385.66	1843.14	0.878683	1.33015
C1orf21	90.7442	79.7567	1711.44	1270.64	0.878918	0.742443
MINPP1	114.338	100.515	598.912	738.569	0.879109	1.23318
QARS	131.579	115.811	100.726	255.658	0.880163	2.53816
AC092338.1	192.378	169.346	487.297	706.885	0.880281	1.45063
RNF2	60.7986	53.5353	444.647	529.89	0.880535	1.19171
BAG2	196.008	172.624	1850.27	1037.93	0.880701	0.56096
PLPPR2	186.026	163.884	76.2252	172.624	0.880973	2.26466
ANAPC15	162.432	143.125	81.6698	136.57	0.881137	1.67222
QSOX1	250.454	220.697	297.641	1170.13	0.881186	3.93134
GMCL1	88.0219	77.5716	372.051	422.82	0.881276	1.13646
RCN1	101.634	89.5897	444.647	854.38	0.881498	1.92148
RNASEL	64.4284	56.813	178.766	95.0525	0.8818	0.531714
GNAI1	220.508	194.475	1566.25	1307.79	0.88194	0.834985
PCCB	78.04	68.8311	321.235	335.415	0.881998	1.04414
BBOF1	40.8349	36.0544	182.396	207.586	0.882931	1.13811
CPLANE1	163.34	144.218	1183.3	1016.08	0.882931	0.858679
MED13	190.563	168.254	2677.86	3551.9	0.882931	1.3264
PLK5	343.921	303.731	10.8893	44.7949	0.883143	4.11366
SMAD3	194.193	171.532	1907.44	5401.61	0.883306	2.83186
NUDT18	180.581	159.513	134.301	206.493	0.883334	1.53754
SLC35A1	166.969	147.495	421.053	479.633	0.883367	1.13913
ZNF610	98.9112	87.4046	302.178	438.116	0.883667	1.44986
KCTD18	296.734	262.214	358.44	481.818	0.883667	1.34421
MYD88	170.599	150.773	64.4284	133.292	0.883785	2.06884
ZNF281	156.988	138.755	274.955	378.025	0.883859	1.37486
ETAA1	187.841	166.069	464.61	352.896	0.884094	0.759553
GLIPR2	218.694	193.383	202.36	336.508	0.884263	1.66292
NUDT2	147.006	130.014	201.452	332.138	0.884417	1.64872
DTX2	133.394	117.996	218.694	560.482	0.884569	2.56286
SMURF2	613.431	543.001	2718.7	5826.61	0.885187	2.14316
CIR1	61.7061	54.6279	892.923	647.887	0.885292	0.725579
DCAF6	312.16	276.417	3225.05	2198.23	0.885498	0.68161
EML3	78.9475	69.9237	113.43	226.159	0.885699	1.99382
METTL27	113.43	100.515	98.9112	282.972	0.886142	2.86087
PTBP1	326.679	289.528	358.44	1422.51	0.886275	3.96862
CIART	65.3358	57.9056	28.1307	66.646	0.886275	2.36916
FAM117A	130.672	115.811	129.764	274.232	0.886275	2.11331
HEG1	130.672	115.811	1225.95	2217.89	0.886275	1.80911
TUBG2	151.543	134.385	153.358	218.512	0.886776	1.42485
CTSB	523.594	464.337	854.811	2451.7	0.886826	2.86812
H3F3A	272.233	241.455	432.85	410.802	0.886944	0.949062
ACAD10	141.561	125.644	453.721	867.491	0.887562	1.91195
ADAMTS5	89.8368	79.7567	434.665	309.194	0.887796	0.711338
HDAC5	162.432	144.218	334.846	1230.22	0.887864	3.67398
HIST1H4E	867.515	770.253	640.654	797.567	0.887885	1.24493
SRXN1	145.191	128.922	78.04	217.419	0.887948	2.78599
IFI35	110.708	98.3302	112.523	357.266	0.888194	3.17506
ZNF433	93.4666	83.0344	109.801	175.902	0.888386	1.60201
SLC29A3	169.692	150.773	268.603	381.303	0.888511	1.41958
DBT	190.563	169.346	508.168	598.722	0.888664	1.1782
YME1L1	194.193	172.624	1215.07	1637.74	0.888932	1.34786
UBE2Q2	117.968	104.886	628.858	724.366	0.889105	1.15188
DDX3X	298.549	265.492	1419.24	1941.47	0.889274	1.36797
C2orf74	87.1145	77.5716	189.655	143.125	0.890456	0.754658
ALG12	45.3721	40.4246	120.69	284.065	0.890958	2.35368
FUBP1	90.7442	80.8493	1637.03	1656.32	0.890958	1.01178
RPS24	321.235	286.25	807.624	1754.65	0.891094	2.17261
ZCCHC2	115.245	102.7	666.97	1531.77	0.891147	2.2966
GABRE	185.118	164.976	325.772	445.764	0.891194	1.36833
PLIN2	373.866	333.23	929.221	1547.06	0.891308	1.6649
CCNI	167.877	149.68	1477.32	1116.59	0.891608	0.755826
TOB1	1305.81	1164.67	346.643	386.765	0.891911	1.11575
GDF15	598.912	534.261	284.029	1022.63	0.892052	3.60045
UBAC1	77.1326	68.8311	137.024	403.154	0.892374	2.94222
MACROD2	77.1326	68.8311	2023.6	1278.29	0.892374	0.631693
SERPING1	52.6317	46.98	290.382	272.047	0.892618	0.93686
PDE7B	28.1307	25.1288	254.991	162.791	0.893288	0.638418
REST	112.523	100.515	926.499	1255.35	0.893288	1.35494
ZNF250	88.0219	78.6642	411.979	662.09	0.893688	1.6071
GLUL	493.649	441.393	626.135	1146.09	0.894145	1.83042
DECR1	95.2814	85.2195	720.509	457.782	0.894398	0.635359
GYG1	98.9112	88.4972	278.585	680.663	0.894713	2.44329
ASCC1	98.9112	88.4972	810.346	1128.61	0.894713	1.39275
SRD5A1	141.561	126.737	169.692	509.132	0.89528	3.00033
STEAP1B	141.561	126.737	187.841	364.914	0.89528	1.94268
CHTOP	180.581	161.699	489.111	788.827	0.895435	1.61277
OSBPL3	184.211	164.976	1922.87	2284.54	0.895584	1.18809
SEC62	202.36	181.365	1060.8	884.972	0.896249	0.834249
NFE2L1	376.589	337.6	352.995	1295.77	0.89647	3.6708
FRYL	181.488	162.791	2338.48	3096.31	0.896978	1.32407
BASP1	370.236	332.138	1432.85	1913.07	0.897096	1.33515
ZHX3	185.118	166.069	1042.65	1101.3	0.897096	1.05625
NDN	110.708	99.4227	69.8731	105.978	0.898063	1.51672
MAGI1	57.1689	51.3502	2284.03	3762.77	0.89822	1.64742
XPNPEP3	117.968	105.978	774.956	1155.93	0.898367	1.4916
RBFA	68.0582	61.1832	122.505	187.92	0.898984	1.53398
AC090360.1	68.0582	61.1832	420.146	352.896	0.898984	0.839937
STK32C	157.895	142.032	1001.82	1380.99	0.899538	1.37849
ANKRD24	86.207	77.5716	102.541	334.323	0.899829	3.26038
HIST1H4H	532.669	479.633	460.073	587.796	0.900434	1.27761
TP53I3	107.986	97.2376	243.195	173.717	0.900468	0.714312
CD44	331.216	298.268	3988.21	4540.67	0.900524	1.13852
SPACA6	111.615	100.515	1285.85	1904.33	0.90055	1.48099
AC093884.1	351.18	316.842	1529.95	2826.45	0.90222	1.84741
WDFY1	351.18	316.842	1273.14	2204.78	0.90222	1.73176
PPP2R3C	79.8549	72.1088	396.552	736.384	0.902998	1.85697
CKS1B	72.5954	65.5535	276.77	485.096	0.902998	1.7527
FBXO11	130.672	117.996	2521.78	3640.4	0.902998	1.44358
TCEAL8	72.5954	65.5535	61.7061	87.4046	0.902998	1.41647
PUDP	101.634	91.7748	820.328	1069.61	0.902998	1.30389
TBL2	362.977	327.767	475.5	513.502	0.902998	1.07992
PCYOX1	130.672	117.996	287.659	244.733	0.902998	0.850774
NASP	156.08	140.94	230.49	841.269	0.902998	3.64991
CCDC142	61.7061	55.7204	676.045	1519.75	0.902998	2.248
TRIM16L	68.9656	62.2758	225.046	246.918	0.902998	1.09719
AP4B1	68.9656	62.2758	122.505	125.644	0.902998	1.02563
VPS26B	137.931	124.552	235.935	369.284	0.902998	1.5652
RANBP10	215.064	194.475	359.347	973.469	0.904268	2.70899
SLC9A1	608.894	550.649	450.999	1068.52	0.904343	2.36923
ISOC1	135.209	122.366	79.8549	117.996	0.905018	1.47763
GNB2	120.69	109.256	176.044	379.118	0.905261	2.15354
SETBP1	333.031	301.546	4768.61	2245.21	0.905458	0.47083
KIN	98.9112	89.5897	449.184	527.705	0.905759	1.17481
SNX29	282.215	255.658	2353	4435.78	0.905901	1.88516
SLC25A30	88.0219	79.7567	156.08	286.25	0.906101	1.834
CCDC92	88.0219	79.7567	918.332	1276.11	0.906101	1.38959
CEP68	238.657	216.326	653.358	840.177	0.906431	1.28594
MARCH5	176.951	160.606	700.545	1211.65	0.907628	1.72958
ARHGAP5	117.968	107.071	2481.85	1693.46	0.907628	0.682338
SERP1	265.881	241.455	408.349	444.671	0.908134	1.08895
WASHC5	158.802	144.218	1043.56	1541.6	0.908158	1.47725
SMTN	262.251	238.178	274.048	640.239	0.908205	2.33623
ZNF214	51.7242	46.98	265.881	138.755	0.908278	0.521869
SSR1	203.267	184.642	985.482	1425.79	0.908373	1.44679
USP38	96.1889	87.4046	798.549	1007.34	0.908677	1.26146
AP3B1	229.583	208.679	3398.37	2948.81	0.908946	0.867714
ISCA2	137.024	124.552	95.2814	145.31	0.908978	1.52506
PTBP3	225.953	205.401	1441.02	1740.44	0.909042	1.20779
TMOD2	44.4647	40.4246	237.75	263.306	0.90914	1.10749
ABHD14A	85.2996	77.5716	49.0019	64.4609	0.909402	1.31548
PRADC1	85.2996	77.5716	39.9275	48.0725	0.909402	1.204
ABHD14A-ACY1	85.2996	77.5716	319.42	373.655	0.909402	1.16979
CSNK1G1	81.6698	74.2939	1436.48	1948.03	0.909686	1.35611
PELI1	237.75	216.326	443.739	662.09	0.909891	1.49207
MCL1	431.035	392.228	735.936	1324.18	0.909968	1.79931
GON7	78.04	71.0162	38.1126	66.646	0.909998	1.74866
TSC22D2	416.516	379.118	2256.81	2709.54	0.910211	1.20061
NBR1	148.821	135.477	794.012	1261.9	0.910339	1.58928
HERPUD2	145.191	132.199	925.591	1030.28	0.910523	1.11311
AL359736.1	107.986	98.3302	1541.74	1071.8	0.910586	0.695186
SPATA13	107.986	98.3302	1386.57	951.618	0.910586	0.68631
MAP2	70.7805	64.4609	852.996	480.725	0.910716	0.563573
KAT6A	137.931	125.644	1917.43	2212.43	0.910919	1.15385
HIBCH	97.0963	88.4972	1041.74	914.471	0.911437	0.877827
NFAT5	220.508	201.031	3763.16	4369.14	0.911668	1.16103
RXRA	156.988	143.125	579.856	1697.83	0.911697	2.92803
PIP5K1C	149.728	136.57	479.13	1421.42	0.912119	2.96667
SLC25A23	59.8912	54.6279	98.9112	261.121	0.912119	2.63996
RARS	119.782	109.256	629.765	784.456	0.912119	1.24563
PLEKHH2	86.207	78.6642	348.458	382.395	0.912503	1.09739
ARHGAP18	86.207	78.6642	918.332	792.104	0.912503	0.862547
ISOC2	142.468	130.014	94.374	144.218	0.912584	1.52815
INIP	56.2614	51.3502	242.287	372.562	0.912707	1.53769
ZMIZ1	251.362	229.437	3892.02	8541.62	0.912777	2.19465
C16orf58	191.47	174.809	576.226	815.048	0.912983	1.41446
RNF25	217.786	198.845	119.782	251.288	0.913031	2.09787
CTR9	282.215	257.844	517.242	729.829	0.913644	1.411
PPM1D	176.951	161.699	1498.19	1230.22	0.913803	0.821139
ACADSB	225.953	206.493	177.859	241.455	0.913877	1.35757
IRF2BP1	150.635	137.662	64.4284	194.475	0.913877	3.01847
GPSM2	71.6879	65.5535	918.332	458.874	0.914428	0.499682
DCPS	158.802	145.31	231.398	327.767	0.915038	1.41647
RAB13	113.43	103.793	138.839	134.385	0.915038	0.967919
AL358472.6	113.43	103.793	941.018	827.066	0.915038	0.878906
ASTE1	87.1145	79.7567	218.694	268.769	0.915539	1.22898
NAALADL2	87.1145	79.7567	5710.53	1701.11	0.915539	0.29789
GEM	557.17	510.224	978.223	978.932	0.915744	1.00072
MLLT3	106.171	97.2376	2550.82	1839.87	0.915861	0.721284
CCDC32	83.4847	76.479	226.861	398.784	0.916085	1.75784
MTCL1	79.8549	73.2014	3019.06	1827.85	0.916679	0.605436
SOAT1	152.45	139.847	492.741	1033.56	0.917331	2.09757
ZNF561	76.2252	69.9237	410.164	573.593	0.917331	1.39845
RAB8B	133.394	122.366	638.839	869.676	0.917331	1.36134
C4orf47	57.1689	52.4428	45.3721	57.9056	0.917331	1.27624
EIF4G2	495.464	454.504	1281.31	1713.13	0.917331	1.33702
CDAN1	228.675	209.771	232.305	409.709	0.917331	1.76367
PACSIN2	259.529	238.178	1353	3111.6	0.917732	2.29979
EPHB4	110.708	101.608	290.382	498.206	0.917801	1.7157
TMEM47	236.842	217.419	324.864	199.938	0.91799	0.615451
TSC22D1	126.134	115.811	4039.93	3353.06	0.918156	0.829979
ZC3H11B	53.5391	49.1651	25.4084	34.9618	0.918303	1.376
CIB1	88.0219	80.8493	56.2614	75.3865	0.918513	1.33993
FAM102A	344.828	316.842	734.121	1229.13	0.91884	1.67428
SOX9	237.75	218.512	84.3921	154.051	0.919082	1.82541
SEC24B	134.301	123.459	2137.03	2151.25	0.919268	1.00665
PNMA2	49.9093	45.8874	116.153	175.902	0.919416	1.5144
C11orf65	180.581	166.069	232.305	322.305	0.919636	1.38742
EPC2	300.363	276.417	2668.79	2497.59	0.920276	0.935851
MYL6	485.482	446.856	347.55	548.464	0.920439	1.57808
MBOAT7	61.7061	56.813	147.006	559.39	0.920703	3.80522
UBR3	196.915	181.365	2759.53	3147.66	0.92103	1.14065
CD58	104.356	96.1451	340.291	440.301	0.921319	1.2939
SRSF5	367.514	338.693	411.979	712.348	0.921578	1.72909
HIST1H3I	394.737	363.822	85.2996	180.272	0.92168	2.1134
PNPLA2	452.814	417.357	100.726	229.437	0.921697	2.27783
SLC16A1	244.102	225.067	235.028	660.997	0.92202	2.81243
CD72	143.376	132.199	144.283	181.365	0.922048	1.257
GRPEL1	182.396	168.254	166.062	422.82	0.922465	2.54616
RTL6	69.8731	64.4609	137.931	308.101	0.922543	2.23373
ZFP62	108.893	100.515	363.884	432.653	0.923064	1.18898
ZNF226	81.6698	75.3865	431.035	453.411	0.923064	1.05191
BPGM	202.36	186.827	307.623	369.284	0.923244	1.20045
TRIM13	159.71	147.495	686.934	699.237	0.92352	1.01791
MPC2	159.71	147.495	202.36	164.976	0.92352	0.815262
SERINC5	117.06	108.163	745.01	1034.65	0.923998	1.38878
CUEDC1	50.8168	46.98	582.578	1749.18	0.924498	3.00249
MFSD4B	125.227	115.811	148.821	225.067	0.924809	1.51234
CTDSP2	172.414	159.513	1469.15	2509.6	0.925177	1.7082
TMF1	172.414	159.513	1068.06	694.867	0.925177	0.650588
SEMA7A	156.988	145.31	113.43	255.658	0.925616	2.25388
AC093525.1	322.142	298.268	344.828	1157.02	0.925891	3.35535
ATP6V0C	322.142	298.268	113.43	380.21	0.925891	3.35193
SLC39A7	117.968	109.256	122.505	180.272	0.926151	1.47155
TBC1D23	165.155	152.958	1217.79	1412.68	0.926151	1.16004
PCNX4	173.321	160.606	1992.74	1988.45	0.926636	0.997848
U2AF2	161.525	149.68	560.799	1434.53	0.926672	2.55801
IRGQ	126.134	116.904	186.026	443.578	0.926818	2.3845
LSS	126.134	116.904	483.667	872.954	0.926818	1.80487
TMSB10	891.108	825.974	179.674	301.546	0.926906	1.6783
IRF2	102.541	95.0525	1315.79	2324.96	0.926971	1.76697
FCHO2	110.708	102.7	1705.99	1685.82	0.92767	0.988174
MOSPD3	55.354	51.3502	9.98187	9.83302	0.92767	0.985088
RNF122	43.5572	40.4246	66.2433	108.163	0.928081	1.63282
AC005954.1	162.432	150.773	134.301	323.397	0.928221	2.40799
AEBP2	118.875	110.348	2852.09	2463.72	0.928272	0.863828
FAM98A	118.875	110.348	326.679	248.011	0.928272	0.759187
C12orf65	428.313	397.691	357.532	960.358	0.928506	2.68607
NCKAP5L	127.042	117.996	440.11	840.177	0.928798	1.90902
DOCK11	127.042	117.996	983.667	1607.15	0.928798	1.63384
CTNNB1	452.814	420.635	1963.71	2658.19	0.928935	1.35366
PUSL1	83.4847	77.5716	42.6498	144.218	0.929171	3.38144
MEAK7	103.448	96.1451	230.49	491.651	0.929401	2.13307
AC098484.3	215.064	199.938	297.641	505.854	0.929668	1.69954
C1orf50	215.064	199.938	123.412	193.383	0.929668	1.56697
ZNF217	366.607	340.878	1184.21	1733.89	0.929819	1.46417
CTBS	243.195	226.159	370.236	298.268	0.929953	0.805616
PGK1	131.579	122.366	542.651	863.121	0.929984	1.59056
AC090517.4	151.543	140.94	2014.52	1825.66	0.930033	0.906252
DKKL1	79.8549	74.2939	105.263	83.0344	0.930361	0.788826
SH3YL1	79.8549	74.2939	944.647	669.738	0.930361	0.708982
STAG1	99.8187	92.8674	6667.89	5966.46	0.930361	0.894805
LIMD1	136.116	126.737	711.435	1411.58	0.931091	1.98414
PCDH10	245.009	228.345	109.801	29.4991	0.931983	0.26866
SURF2	100.726	93.96	24.5009	90.6823	0.932826	3.70118
MAN1B1	181.488	169.346	166.062	415.172	0.933098	2.5001
BOK	36.2977	33.8693	91.6517	205.401	0.933098	2.2411
UGP2	189.655	176.994	1327.59	1142.82	0.933242	0.860821
UBE4B	80.7624	75.3865	1267.7	2433.13	0.933436	1.91933
PGAM1	88.9293	83.0344	263.158	482.91	0.933712	1.83506
KRI1	194.193	181.365	108.893	370.377	0.933941	3.40129
ANXA6	97.0963	90.6823	1074.41	1201.81	0.933941	1.11858
SOCS6	246.824	230.53	722.324	1083.82	0.933983	1.50046
KANK2	360.255	336.508	881.126	1336.2	0.934083	1.51647
FBXW7	166.062	155.143	1770.42	2133.77	0.934249	1.20523
IRS2	811.253	758.235	2156.99	3184.81	0.934646	1.4765
TPCN1	223.231	208.679	607.986	1235.68	0.934811	2.03242
IDH2	264.066	246.918	174.229	179.179	0.935063	1.02841
NEU1	500.001	467.615	100.726	268.769	0.935228	2.66832
MAP3K11	101.634	95.0525	205.082	763.698	0.935248	3.72387
KBTBD7	101.634	95.0525	120.69	79.7567	0.935248	0.66084
TBCC	337.569	315.749	72.5954	99.4227	0.935363	1.36955
KLHL7	134.301	125.644	875.682	878.416	0.935538	1.00312
H2AFJ	183.303	171.532	185.118	238.178	0.93578	1.28662
GMIP	106.171	99.4227	58.9838	140.94	0.936442	2.38947
GON4L	106.171	99.4227	780.4	1715.32	0.936442	2.19799
SCAF8	89.8368	84.1269	2500	2902.93	0.936442	1.16117
INAFM1	98.0038	91.7748	72.5954	230.53	0.936442	3.17554
BCORL1	57.1689	53.5353	335.754	699.237	0.936442	2.08259
MSH2	57.1689	53.5353	633.395	1153.74	0.936442	1.82152
KCTD17	114.338	107.071	47.187	122.366	0.936442	2.59322
AP000295.1	143.376	134.385	873.867	952.71	0.937289	1.09022
IFNAR2	143.376	134.385	296.734	267.677	0.937289	0.902077
ZNF275	102.541	96.1451	266.788	486.188	0.937626	1.82238
VAMP1	775.863	727.643	103.448	134.385	0.93785	1.29905
ZNF878	78.04	73.2014	9.98187	19.666	0.937998	1.97018
DAPK1	78.04	73.2014	1246.83	1928.36	0.937998	1.54662
AC008770.1	78.04	73.2014	187.841	269.862	0.937998	1.43665
SYNC	156.08	146.403	389.293	474.17	0.937998	1.21803
NCS1	193.285	181.365	305.808	978.932	0.938326	3.20113
GAMT	123.412	115.811	19.9637	74.2939	0.938409	3.72144
MB21D2	61.7061	57.9056	389.293	792.104	0.938409	2.03473
POGZ	61.7061	57.9056	960.074	1338.38	0.938409	1.39404
CLHC1	61.7061	57.9056	554.447	646.794	0.938409	1.16656
INTS8	123.412	115.811	1031.76	812.863	0.938409	0.78784
ARHGAP12	267.695	251.288	2512.71	1880.29	0.938709	0.748313
OSMR	197.822	185.735	2436.48	2059.47	0.938897	0.845264
CARHSP1	144.283	135.477	261.343	600.907	0.938966	2.2993
PLPP1	90.7442	85.2195	571.689	950.525	0.939118	1.66266
PRKCI	173.321	162.791	833.032	930.859	0.939244	1.11743
ZDHHC20	127.949	120.181	729.584	676.293	0.939288	0.926958
LRRK1	82.5773	77.5716	965.519	1266.27	0.939382	1.3115
ANXA4	239.565	225.067	1129.77	1668.34	0.939482	1.47671
RAB31	231.398	217.419	998.187	1389.73	0.93959	1.39226
ASAH2B	74.4103	69.9237	355.717	218.512	0.939705	0.614284
DBN1	103.448	97.2376	300.363	737.476	0.939962	2.45528
RPLP1	538.113	505.854	264.973	553.927	0.940051	2.0905
CHKA	323.049	303.731	421.961	1294.68	0.9402	3.06825
ADAMTS4	95.2814	89.5897	293.104	186.827	0.940264	0.63741
ARID4A	145.191	136.57	1264.97	905.73	0.940623	0.716007
MITF	274.048	257.844	4872.06	1541.6	0.940872	0.316416
FNDC3B	294.919	277.51	16470.1	13870	0.94097	0.842134
ZNF319	78.9475	74.2939	228.675	446.856	0.941055	1.95411
GTF3A	78.9475	74.2939	187.841	262.214	0.941055	1.39594
HIST1H2BI	386.57	363.822	154.265	298.268	0.941152	1.93348
TNS3	128.857	121.274	8460.99	5403.79	0.941152	0.638671
RPL23	299.456	281.88	372.051	986.58	0.941307	2.65173
TBX18	49.9093	46.98	1933.76	1450.92	0.941307	0.750309
PANK3	220.508	207.586	808.531	879.509	0.941397	1.08779
KCTD12	133.394	125.644	163.34	117.996	0.941902	0.722398
DYNC1H1	417.423	393.321	1848.46	5173.26	0.942258	2.79869
GAPDH	521.779	491.651	412.886	1188.7	0.942258	2.87901
SAP30	459.166	432.653	149.728	91.7748	0.942258	0.612944
COPA	166.969	157.328	1587.12	1627.91	0.942258	1.0257
RNF181	304.901	287.343	30.853	83.0344	0.942414	2.69129
LRWD1	158.802	149.68	59.8912	190.105	0.942558	3.17417
HMGB1	323.049	304.824	2144.29	2668.03	0.943582	1.24425
SCN1B	67.1507	63.3683	48.0944	121.274	0.943673	2.52158
CDC5L	134.301	126.737	862.07	1129.7	0.943673	1.31046
ABTB2	449.184	423.912	762.252	2553.31	0.943739	3.34969
UBAP2	193.285	182.457	1102.54	2237.56	0.943979	2.02945
ABCF3	193.285	182.457	105.263	208.679	0.943979	1.98244
ALDH7A1	172.414	162.791	740.473	686.126	0.944187	0.926605
INPP5A	210.527	198.845	874.774	2601.38	0.944515	2.97377
ANKRD31	117.968	111.441	109.801	135.477	0.944674	1.23385
TNPO1	345.736	326.675	4970.06	3359.61	0.944869	0.67597
AC092724.1	84.3921	79.7567	112.523	138.755	0.945073	1.23313
LAMP2	84.3921	79.7567	646.099	787.734	0.945073	1.21922
SLC26A6	109.801	103.793	78.9475	205.401	0.945287	2.60174
LDHB	147.913	139.847	652.451	846.732	0.94547	1.29777
AC010197.2	147.913	139.847	942.833	1182.15	0.94547	1.25383
DIPK2A	249.547	235.992	1376.59	543.001	0.945685	0.394454
STX7	152.45	144.218	1389.29	1327.46	0.945998	0.955491
ARSJ	76.2252	72.1088	1149.73	750.587	0.945998	0.652838
CUL3	139.746	132.199	2857.54	3289.69	0.945998	1.15123
LAPTM4A	203.267	192.29	856.626	847.825	0.945998	0.989726
GLMN	203.267	192.29	428.313	381.303	0.945998	0.890243
SLC44A2	63.521	60.0907	326.679	400.969	0.945998	1.22741
SEC61G	144.283	136.57	323.049	336.508	0.946538	1.04166
VCPIP1	118.875	112.533	710.527	914.471	0.946654	1.28703
CLK1	340.291	322.305	943.74	1408.31	0.947144	1.49226
XRRA1	110.708	104.886	715.065	847.825	0.947407	1.18566
CASP3	251.362	238.178	349.365	524.428	0.94755	1.50109
RARS2	127.949	121.274	1916.52	1547.06	0.947827	0.807225
NDUFA4	157.895	149.68	241.38	217.419	0.947975	0.900734
HEXB	333.031	315.749	401.997	477.448	0.948106	1.18769
ARHGEF18	132.487	125.644	374.774	928.674	0.948354	2.47796
AHSA1	252.269	239.27	187.841	444.671	0.948472	2.36728
AKT1	59.8912	56.813	254.991	1048.86	0.948604	4.1133
ZNF672	59.8912	56.813	156.08	362.729	0.948604	2.32399
RIOK2	119.782	113.626	544.465	440.301	0.948604	0.808685
ABCC5	89.8368	85.2195	570.781	1047.76	0.948604	1.83566
CREB1	171.507	162.791	1889.29	1896.68	0.949183	1.00391
HTRA3	94.374	89.5897	108.893	185.735	0.949305	1.70566
ZNRF2	64.4284	61.1832	676.045	962.543	0.949631	1.42379
ZNF638	185.118	175.902	3080.77	2805.69	0.950213	0.910711
ARL2	86.207	81.9418	301.271	793.197	0.950524	2.63284
ARL2-SNX15	86.207	81.9418	565.337	1240.05	0.950524	2.19348
RABEP1	155.173	147.495	1111.62	2201.5	0.950524	1.98045
BBS10	142.468	135.477	222.323	158.421	0.950927	0.71257
NLRC5	215.971	205.401	602.542	2109.73	0.951056	3.50138
HMGN4	527.224	501.484	1298.55	966.914	0.951178	0.74461
PHC3	164.247	156.236	2172.42	2147.97	0.951224	0.988746
BMERB1	56.2614	53.5353	988.205	2209.15	0.951546	2.23552
C8orf88	112.523	107.071	113.43	190.105	0.951546	1.67596
DAGLB	246.824	234.9	1979.13	2942.26	0.951689	1.48664
KDELR2	246.824	234.9	1716.88	2221.17	0.951689	1.29372
AC026786.1	138.839	132.199	425.59	678.478	0.95218	1.5942
ZNF10	138.839	132.199	147.006	227.252	0.95218	1.54587
RRP1B	99.8187	95.0525	254.991	726.551	0.952252	2.84932
GEMIN7	99.8187	95.0525	174.229	364.914	0.952252	2.09445
UQCC3	60.7986	57.9056	80.7624	103.793	0.952415	1.28517
CCDC171	60.7986	57.9056	813.976	863.121	0.952415	1.06038
PFKFB4	82.5773	78.6642	119.782	310.286	0.952613	2.59042
HEMK1	104.356	99.4227	610.709	1195.26	0.952728	1.95717
COL18A1	65.3358	62.2758	191.47	660.997	0.953164	3.45222
HIC1	178.766	170.439	321.235	687.219	0.953419	2.13931
CCNF	113.43	108.163	98.0038	353.989	0.953565	3.61199
EIF2AK3	226.861	216.326	1218.7	1006.25	0.953565	0.825675
RAB11A	161.525	154.051	352.088	494.929	0.953728	1.4057
MRGPRF	139.746	133.292	281.307	323.397	0.953816	1.14962
NCKIPSD	166.062	158.421	68.0582	159.513	0.953987	2.34378
TNKS1BP1	170.599	162.791	920.147	1541.6	0.954232	1.67538
SNX2	170.599	162.791	1074.41	1111.13	0.954232	1.03418
ZNF18	293.104	279.695	226.861	292.805	0.954251	1.29068
IVNS1ABP	420.146	400.969	682.397	725.458	0.954356	1.0631
ELF2	74.4103	71.0162	2378.41	2345.72	0.954388	0.986258
SLC39A10	520.872	497.114	2474.6	1341.66	0.954388	0.542174
TMEM165	329.402	314.657	2221.42	2426.57	0.955237	1.09235
NDUFA12	109.801	104.886	263.158	421.727	0.955237	1.60256
RAP1B	224.138	214.141	2866.61	3242.71	0.955398	1.1312
JADE2	57.1689	54.6279	581.671	1478.23	0.955553	2.54135
DOK1	57.1689	54.6279	39.02	72.1088	0.955553	1.848
MAP2K4	215.971	206.493	1625.23	2081.32	0.956115	1.28063
CRIP1	30.853	29.4991	1.81488	15.2958	0.956115	8.42798
ARV1	185.118	176.994	244.102	410.802	0.956115	1.68291
NT5C2	255.899	244.733	1908.35	2569.7	0.956366	1.34655
ALCAM	97.0963	92.8674	1115.25	751.68	0.956446	0.674003
ZNF608	66.2433	63.3683	2629.77	1273.92	0.9566	0.484424
LBH	344.828	329.952	709.62	567.037	0.956861	0.799072
ACTG1	486.389	465.43	302.178	633.683	0.956908	2.09705
BBS2	176.951	169.346	664.248	705.792	0.957023	1.06254
CYP51A1	176.951	169.346	760.437	468.707	0.957023	0.616366
LUC7L3	168.784	161.699	931.036	1360.23	0.958019	1.46099
PGD	133.394	127.829	208.712	547.371	0.958283	2.62262
ATXN3	133.394	127.829	733.213	988.765	0.958283	1.34854
SNRNP48	177.859	170.439	384.756	426.097	0.958283	1.10745
GOLT1B	88.9293	85.2195	429.22	356.174	0.958283	0.829816
HELB	53.5391	51.3502	239.565	197.753	0.959116	0.825468
STYX	111.615	107.071	387.478	353.989	0.959282	0.913571
SIK2	174.229	167.161	1630.67	1752.46	0.959435	1.07469
SELENOT	178.766	171.532	428.313	441.393	0.95953	1.03054
NUCB1	62.6135	60.0907	167.877	431.56	0.959708	2.5707
PREPL	125.227	120.181	691.471	808.493	0.959708	1.16924
PEX2	125.227	120.181	592.56	345.248	0.959708	0.582639
TOLLIP	129.764	124.552	292.196	980.024	0.95983	3.35399
GALK2	67.1507	64.4609	2109.8	2025.6	0.959943	0.96009
HRAS	71.6879	68.8311	68.9656	179.179	0.960149	2.5981
TRIT1	147.913	142.032	470.963	659.905	0.960243	1.40118
NMD3	147.913	142.032	776.771	634.776	0.960243	0.817199
NBPF10	376.589	361.637	2526.32	3138.92	0.960296	1.24249
NOTCH2NLA	376.589	361.637	1551.73	1517.56	0.960296	0.977983
ACER2	76.2252	73.2014	59.8912	137.662	0.960331	2.29854
METTL8	76.2252	73.2014	680.582	975.654	0.960331	1.43356
MTO1	80.7624	77.5716	638.839	1349.31	0.960492	2.11213
ANTXR2	161.525	155.143	3215.07	2009.21	0.960492	0.624937
RSBN1L	166.062	159.513	1032.67	1094.74	0.960566	1.06011
SEC22A	175.136	168.254	812.161	642.424	0.960702	0.791006
CHCHD7	471.87	453.411	98.9112	122.366	0.960882	1.23713
SLC25A1	197.822	190.105	65.3358	185.735	0.960988	2.84277
DOP1B	107.986	103.793	385.663	701.422	0.961174	1.81874
DPY30	117.06	112.533	2479.13	2873.43	0.961331	1.15905
SH3GLB1	117.06	112.533	1362.07	1119.87	0.961331	0.822183
IRF2BPL	261.343	251.288	447.369	927.581	0.961525	2.07341
MRPS36	139.746	134.385	98.9112	197.753	0.961634	1.9993
YEATS2	144.283	138.755	1424.68	2202.6	0.961683	1.54602
SORBS1	148.821	143.125	257.714	594.351	0.961729	2.30625
IRX2	294.919	284.065	29.0382	134.385	0.963197	4.62786
TESK1	104.356	100.515	53.5391	152.958	0.963197	2.85694
IP6K2	222.323	214.141	707.805	1102.39	0.963197	1.55748
MAP3K14	322.142	310.286	959.167	1377.72	0.963197	1.43637
ZNF671	54.4465	52.4428	112.523	167.161	0.963197	1.48558
LRRC23	72.5954	69.9237	274.955	406.431	0.963197	1.47817
MEMO1	58.9838	56.813	1908.35	2082.41	0.963197	1.09121
NOTCH2	340.291	327.767	3449.19	2979.4	0.963197	0.863799
SLC38A6	145.191	139.847	2149.73	1511.01	0.963197	0.702882
ODF2L	63.521	61.1832	676.045	588.889	0.963197	0.87108
HM13	195.1	187.92	1874.78	4613.87	0.963197	2.46103
UBC	831.217	800.845	715.972	971.284	0.96346	1.35659
NXF1	351.18	338.693	216.879	560.482	0.964442	2.58431
TMEM243	173.321	167.161	453.721	348.526	0.964458	0.76815
PICALM	168.784	162.791	2627.05	4707.83	0.964492	1.79206
SND1	150.635	145.31	4898.37	10999.9	0.964648	2.24562
UAP1L1	201.452	194.475	166.969	477.448	0.965367	2.85949
TRPT1	100.726	97.2376	33.5754	77.5716	0.965367	2.31037
POLR3GL	174.229	168.254	94.374	133.292	0.965706	1.41238
AC243547.3	174.229	168.254	86.207	119.089	0.965706	1.38143
RGCC	82.5773	79.7567	71.6879	69.9237	0.965844	0.97539
YBX3	303.086	292.805	636.117	1027	0.966081	1.61449
ZNF654	151.543	146.403	1729.59	1277.2	0.966081	0.738443
TATDN1	119.782	115.811	651.544	1170.13	0.966846	1.79593
ZNF286A	119.782	115.811	453.721	431.56	0.966846	0.951157
AC005324.4	119.782	115.811	676.952	604.184	0.966846	0.892507
WNT5B	115.245	111.441	646.099	1563.45	0.96699	2.41983
S100A16	230.49	222.882	209.619	376.932	0.96699	1.79818
SNTB2	245.009	237.085	930.128	1176.68	0.967657	1.26508
GOPC	143.376	138.755	1556.26	747.309	0.96777	0.480195
MTURN	138.839	134.385	188.748	403.154	0.967919	2.13594
RANBP6	138.839	134.385	108.893	126.737	0.967919	1.16386
XIAP	46.2796	44.7949	588.93	1175.59	0.967919	1.99615
C21orf91	361.162	349.618	502.723	775.716	0.968038	1.54303
ABTB1	125.227	121.274	75.3177	272.047	0.968432	3.61199
ACOT13	74.4103	72.1088	346.643	311.379	0.969071	0.89827
GART	186.026	180.272	588.023	1494.62	0.969071	2.54177
KDM8	139.746	135.477	112.523	164.976	0.969452	1.46616
ATF7IP2	69.8731	67.7386	491.834	543.001	0.969452	1.10403
VMP1	158.802	154.051	2625.23	3686.29	0.970077	1.40418
ZNF665	93.4666	90.6823	238.657	338.693	0.970211	1.41916
HELZ	93.4666	90.6823	2358.44	2424.39	0.970211	1.02796
CNOT6L	88.9293	86.3121	1500.91	1566.73	0.970569	1.04385
ERGIC3	117.06	113.626	116.153	280.787	0.970664	2.4174
UBE2M	117.06	113.626	172.414	367.099	0.970664	2.12917
MRPL55	117.06	113.626	39.9275	51.3502	0.970664	1.28609
HSPG2	215.971	209.771	851.181	1809.28	0.971292	2.12561
SFXN3	107.986	104.886	281.307	294.991	0.971292	1.04864
CNOT3	211.434	205.401	240.472	740.754	0.971465	3.08041
DMXL2	47.187	45.8874	745.918	768.068	0.972459	1.0297
RRP15	113.43	110.348	393.83	822.696	0.972829	2.08896
INSR	108.893	105.978	874.774	1689.09	0.973231	1.93089
INTS9	61.7061	60.0907	592.56	1081.63	0.973821	1.82536
CHST15	76.2252	74.2939	578.041	1084.91	0.974664	1.87687
ZKSCAN3	76.2252	74.2939	307.623	303.731	0.974664	0.987348
ATXN7L3	95.2814	92.8674	334.846	668.645	0.974664	1.99687
DHX9	205.082	199.938	1979.13	3250.36	0.974918	1.64232
SECISBP2	166.969	162.791	637.025	768.068	0.974976	1.20571
SMIM14	276.77	269.862	946.462	1281.57	0.97504	1.35406
YIPF7	128.857	125.644	106.171	156.236	0.975068	1.47155
SNRNP200	143.376	139.847	386.57	1041.21	0.97539	2.69345
FUS	368.422	359.451	732.306	1548.15	0.975653	2.11408
IGBP1	52.6317	51.3502	267.695	438.116	0.975653	1.63662
PLAT	86.207	84.1269	171.507	336.508	0.975871	1.96207
MAN1A2	86.207	84.1269	1584.39	1555.8	0.975871	0.981954
PTGIS	86.207	84.1269	2623.42	2235.37	0.975871	0.852085
RNF7	119.782	116.904	254.991	254.566	0.975967	0.998332
OGFR	153.358	149.68	157.895	450.134	0.976021	2.85084
C12orf60	153.358	149.68	114.338	174.809	0.976021	1.52888
GPC1	100.726	98.3302	317.605	1014.99	0.976214	3.19575
STK26	48.0944	46.98	39.9275	115.811	0.976828	2.90054
MICU3	96.1889	93.96	1411.07	808.493	0.976828	0.572963
SPSB2	158.802	155.143	68.9656	180.272	0.976957	2.61394
MED17	158.802	155.143	829.402	1088.19	0.976957	1.31201
ACAD11	77.1326	75.3865	922.869	679.571	0.977362	0.736368
ASCC3	91.6517	89.5897	7733.22	4015.15	0.977502	0.519208
WDR47	193.285	189.012	568.059	766.975	0.977894	1.35017
AC025283.3	58.0763	56.813	1040.84	2061.66	0.978247	1.98077
SERF2	261.343	255.658	1028.13	1302.33	0.978247	1.26669
CHID1	174.229	170.439	274.955	1269.55	0.978247	4.61731
TAF1D	237.75	232.715	1073.5	1242.24	0.978822	1.15718
DNM1	111.615	109.256	809.439	1021.54	0.978859	1.26204
AMACR	223.231	218.512	194.193	162.791	0.978859	0.838297
TPD52L2	417.423	408.617	274.955	985.487	0.978902	3.58418
ZNF629	68.0582	66.646	316.697	798.66	0.979251	2.52184
FBRSL1	121.597	119.089	418.331	2146.88	0.979371	5.132
AP1M1	121.597	119.089	568.059	1494.62	0.979371	2.6311
ORMDL3	121.597	119.089	100.726	122.366	0.979371	1.21484
ME1	53.5391	52.4428	1295.83	1751.37	0.979523	1.35155
PRR3	53.5391	52.4428	156.08	185.735	0.979523	1.19
ZCCHC9	214.156	209.771	335.754	372.562	0.979523	1.10963
STBD1	39.02	38.2395	45.3721	53.5353	0.979997	1.17992
TBC1D20	258.621	253.473	516.335	983.302	0.980096	1.90439
NAA40	63.521	62.2758	107.078	324.49	0.980397	3.0304
RUNX1T1	63.521	62.2758	6828.5	2401.44	0.980397	0.351679
MOSPD1	127.042	124.552	299.456	536.446	0.980397	1.7914
AC004922.1	151.543	148.588	1480.95	3237.25	0.9805	2.18593
ARPC1A	151.543	148.588	630.672	1263	0.9805	2.00262
KCTD21	88.0219	86.3121	274.955	331.045	0.980575	1.204
CCDC112	137.024	134.385	126.134	122.366	0.980739	0.970127
PBDC1	98.0038	96.1451	101.634	85.2195	0.981034	0.838498
NIT1	107.986	105.978	225.953	315.749	0.981409	1.39741
LDLRAP1	166.969	163.884	270.418	481.818	0.981519	1.78175
RAB35	152.45	149.68	156.08	533.168	0.981831	3.41599
IMPA1	186.933	183.55	300.363	461.059	0.9819	1.53501
RRM2B	103.448	101.608	626.135	688.311	0.982208	1.0993
SEPT8	68.9656	67.7386	263.158	523.335	0.982208	1.98867
TMED8	78.9475	77.5716	257.714	298.268	0.982572	1.15736
RMND5A	281.307	276.417	803.086	1256.44	0.982617	1.56452
CNN3	325.772	320.119	883.849	777.901	0.982649	0.880129
CYBA	88.9293	87.4046	98.9112	215.234	0.982855	2.17603
FANCG	54.4465	53.5353	71.6879	226.159	0.983264	3.15478
TAPBP	54.4465	53.5353	401.09	462.152	0.983264	1.15224
TADA1	64.4284	63.3683	166.062	216.326	0.983547	1.30269
TMTC3	128.857	126.737	685.119	705.792	0.983547	1.03017
HIST1H2BD	629.765	619.48	606.171	837.992	0.983669	1.38243
HIST1H3E	233.213	229.437	225.953	398.784	0.983811	1.76489
FAM214A	158.802	156.236	2366.61	1807.09	0.983837	0.763578
MCOLN1	168.784	166.069	221.416	419.542	0.983911	1.89481
C15orf39	705.083	693.774	225.953	810.678	0.983961	3.58781
AK3	178.766	175.902	340.291	471.985	0.983977	1.387
IQCC	94.374	92.8674	23.5935	54.6279	0.984036	2.31538
ZC3H14	184.211	181.365	1383.85	1616.99	0.984549	1.16847
STK38L	254.084	250.196	598.912	544.094	0.984697	0.90847
PLEC	69.8731	68.8311	1340.29	4533.02	0.985088	3.38211
FMNL2	59.8912	58.9981	1518.15	3017.64	0.985088	1.98771
ZNF20	69.8731	68.8311	284.937	362.729	0.985088	1.27302
MICA	129.764	127.829	782.215	796.475	0.985088	1.01823
CLSTN2	59.8912	58.9981	279.492	284.065	0.985088	1.01636
GAB1	59.8912	58.9981	1107.99	1007.34	0.985088	0.909161
WNT11	79.8549	78.6642	121.597	147.495	0.985088	1.21298
INTS10	159.71	157.328	428.313	512.41	0.985088	1.19634
STXBP3	149.728	147.495	1224.14	952.71	0.985088	0.778269
SHISA5	105.263	103.793	439.202	883.879	0.986032	2.01247
ZNF124	95.2814	93.96	351.18	686.126	0.986131	1.95377
GTF2E2	160.617	158.421	1096.19	1166.85	0.986325	1.06446
PIGC	75.3177	74.2939	536.298	434.838	0.986407	0.810813
FBXL8	65.3358	64.4609	89.8368	123.459	0.986609	1.37426
GSTT2	65.3358	64.4609	14.5191	13.1107	0.986609	0.902998
RNF144A	55.354	54.6279	713.25	742.939	0.986883	1.04163
UAP1	266.788	263.306	432.85	929.767	0.98695	2.14801
STAT2	292.196	288.435	646.099	1222.57	0.987128	1.89224
UPRT	45.3721	44.7949	212.342	220.697	0.987277	1.03935
TMEM104	196.915	194.475	203.267	823.788	0.98761	4.05274
TPRN	373.866	369.284	37.2051	191.198	0.987745	5.13901
TGM2	70.7805	69.9237	281.307	423.912	0.987895	1.50694
LRP6	156.988	155.143	3153.36	1525.21	0.988252	0.483678
GRSF1	147.006	145.31	550.817	884.972	0.988467	1.60665
SLC8B1	223.231	220.697	178.766	434.838	0.988648	2.43244
SRGAP2B	187.841	185.735	2679.68	3829.41	0.98879	1.42906
SCYL2	76.2252	75.3865	823.05	1230.22	0.988997	1.49471
CACNA1C	76.2252	75.3865	2892.02	2995.79	0.988997	1.03588
AL139353.1	177.859	175.902	1813.07	2066.03	0.988997	1.13952
WDR19	50.8168	50.2577	659.711	728.736	0.988997	1.10463
DTD2	177.859	175.902	144.283	151.866	0.988997	1.05255
SH3PXD2B	228.675	226.159	3016.34	2791.48	0.988997	0.925455
CDKL5	66.2433	65.5535	312.16	579.056	0.989586	1.855
ANKRD42	66.2433	65.5535	226.861	284.065	0.989586	1.25216
TSPYL1	229.583	227.252	427.405	474.17	0.989847	1.10942
HIST1H4J	689.656	682.849	247.732	500.391	0.990129	2.01989
ZBTB25	97.0963	96.1451	760.437	1202.91	0.990203	1.58186
PRR16	87.1145	86.3121	1665.16	1941.47	0.990789	1.16594
KCTD10	117.968	116.904	553.54	933.044	0.990982	1.6856
ZRSR2	61.7061	61.1832	192.378	217.419	0.991527	1.13017
AKIRIN2	159.71	158.421	931.943	1053.23	0.991929	1.13014
ZBED5	273.14	270.954	1713.25	1523.03	0.991997	0.888968
GRK5	82.5773	81.9418	1379.31	3398.95	0.992305	2.46423
PSMG2	82.5773	81.9418	747.732	1116.59	0.992305	1.49331
TXN2	118.875	117.996	284.937	571.408	0.992608	2.00538
KLF16	170.599	169.346	174.229	352.896	0.992657	2.02547
RCOR1	227.768	226.159	1074.41	2075.86	0.992938	1.93209
WWC3	88.0219	87.4046	864.793	1240.05	0.992987	1.43393
ARMCX2	88.0219	87.4046	192.378	185.735	0.992987	0.965469
POMT1	72.5954	72.1088	92.5591	257.844	0.993297	2.78572
COQ8A	114.338	113.626	225.953	397.691	0.993775	1.76006
APAF1	135.209	134.385	865.7	806.308	0.993903	0.931394
SYDE1	218.694	217.419	166.969	409.709	0.994172	2.4538
BNIP3L	125.227	124.552	2304	2501.96	0.994606	1.08592
COQ7	41.7423	41.5172	184.211	235.992	0.994606	1.2811
ACAT1	198.73	197.753	276.77	452.319	0.995084	1.63428
CNOT1	204.175	203.216	1968.24	3872.02	0.995304	1.96725
PGBD1	136.116	135.477	254.991	272.047	0.995304	1.06689
ACVR1	68.0582	67.7386	2054.45	2024.51	0.995304	0.985427
MFAP2	115.245	114.719	100.726	164.976	0.99543	1.63787
ALAS1	220.508	219.604	226.861	458.874	0.995899	2.02271
SMAD1	173.321	172.624	822.143	893.712	0.995976	1.08705
RNF185	99.8187	99.4227	531.761	1407.21	0.996034	2.64633
EXTL3	152.45	151.866	599.819	786.642	0.996164	1.31146
ANKRD13C	205.082	204.308	1298.55	1490.25	0.996227	1.14763
KMT2E	284.029	282.972	4406.54	3878.58	0.996279	0.880187
MSL2	157.895	157.328	1151.54	1603.87	0.996411	1.3928
SEC24A	131.579	131.107	1307.62	1469.49	0.996411	1.12379
COMMD6	247.732	246.918	253.176	386.765	0.996715	1.52765
PANX1	84.3921	84.1269	575.318	1033.56	0.996858	1.7965
KDM6A	84.3921	84.1269	2360.26	3410.97	0.996858	1.44517
HIST1H2AH	449.184	447.949	102.541	208.679	0.99725	2.03507
CD59	338.476	337.6	957.352	1722.96	0.997413	1.79972
HSD17B7	63.521	63.3683	211.434	144.218	0.997597	0.682093
CSRNP1	423.776	422.82	238.657	627.128	0.997745	2.62773
CRYBG3	175.136	174.809	1201.45	915.563	0.998132	0.762046
NKRF	74.4103	74.2939	117.06	196.66	0.998436	1.68
AC017083.3	297.641	297.176	2345.74	2461.53	0.998436	1.04936
RABL2A	154.265	154.051	529.946	788.827	0.998609	1.4885
B3GNT8	79.8549	79.7567	14.5191	16.3884	0.99877	1.12875
OSBPL9	79.8549	79.7567	2147.01	2392.7	0.99877	1.11443
TBX3	362.069	361.637	3184.22	2370.85	0.998804	0.744563
RPL22L1	378.403	378.025	579.856	687.219	0.999	1.18515
TMEM167A	170.599	170.439	904.72	543.001	0.999061	0.600187
ARF3	90.7442	90.6823	259.529	499.299	0.999317	1.92387
AC073610.2	90.7442	90.6823	915.609	1566.73	0.999317	1.71113
EIF4A2	710.527	710.162	1321.24	1936.01	0.999487	1.4653
FANCM	48.0944	48.0725	194.193	363.822	0.999545	1.87351
CAPRIN2	101.634	101.608	326.679	454.504	0.999747	1.39129
GALNS	160.617	160.606	216.879	1025.91	0.99993	4.73035
C1S	166.062	166.069	376.589	416.264	1.00004	1.10536
IFT74	166.062	166.069	731.399	651.164	1.00004	0.8903
THYN1	112.523	112.533	89.8368	74.2939	1.00009	0.826988
DLST	117.968	117.996	564.429	916.656	1.00024	1.62404
MYLK	117.968	117.996	5338.48	3928.84	1.00024	0.735946
PYROXD2	123.412	123.459	686.934	819.418	1.00038	1.19286
SMCO4	64.4284	64.4609	280.4	392.228	1.0005	1.39882
TRIM65	134.301	134.385	205.989	469.8	1.00062	2.2807
ATP11A	134.301	134.385	856.626	1592.95	1.00062	1.85956
ZC3H7B	225.953	226.159	544.465	1259.72	1.00091	2.31368
SOWAHC	398.367	398.784	156.08	273.139	1.00105	1.75
KBTBD6	80.7624	80.8493	114.338	112.533	1.00108	0.98422
CEBPB	960.074	961.451	543.558	1384.27	1.00143	2.54668
ZNF14	124.32	124.552	202.36	301.546	1.00187	1.49015
SETD5	162.432	162.791	2724.14	3078.83	1.00221	1.1302
PTMS	514.52	515.687	262.251	419.542	1.00227	1.59977
MAML1	195.1	195.568	457.351	890.435	1.0024	1.94694
IL1RAP	59.8912	60.0907	225.953	488.373	1.00333	2.16139
STRN	119.782	120.181	1297.64	1502.27	1.00333	1.15769
ARFIP1	59.8912	60.0907	1782.22	1438.9	1.00333	0.807364
MYADM	108.893	109.256	121.597	394.413	1.00333	3.2436
TP53	179.674	180.272	402.904	1255.35	1.00333	3.11575
PHETA1	92.5591	92.8674	61.7061	131.107	1.00333	2.1247
ALKBH5	163.34	163.884	424.683	886.064	1.00333	2.08641
PLEKHG1	136.116	136.57	1121.6	2085.69	1.00333	1.85957
LAMB2	108.893	109.256	220.508	400.969	1.00333	1.81838
SLC25A12	65.3358	65.5535	675.137	850.01	1.00333	1.25902
ACAT2	87.1145	87.4046	358.44	408.617	1.00333	1.13999
ZNF221	38.1126	38.2395	176.951	142.032	1.00333	0.802665
TTC26	43.5572	43.7023	241.38	191.198	1.00333	0.792103
SLC25A14	49.0019	49.1651	119.782	117.996	1.00333	0.985088
RIOK3	147.006	147.495	754.085	1311.07	1.00333	1.73862
LRRC57	147.006	147.495	137.024	202.123	1.00333	1.4751
GGCT	147.006	147.495	86.207	112.533	1.00333	1.30539
AC018362.3	147.006	147.495	316.697	409.709	1.00333	1.29369
AC005154.5	147.006	147.495	82.5773	105.978	1.00333	1.28338
NUP133	114.338	114.719	613.431	971.284	1.00333	1.58336
ANKRD13A	289.474	290.62	457.351	624.943	1.00396	1.36644
ISLR2	147.913	148.588	60.7986	250.196	1.00456	4.11515
NNMT	120.69	121.274	1190.56	721.088	1.00484	0.605669
WDR48	170.599	171.532	522.687	643.516	1.00547	1.23117
HIST1H2AD	335.754	337.6	198.73	315.749	1.0055	1.58884
AL031777.3	335.754	337.6	798.549	1116.59	1.0055	1.39828
SLC35E2B	71.6879	72.1088	639.747	1250.98	1.00587	1.95543
ST6GALNAC4	137.931	138.755	30.853	93.96	1.00597	3.0454
ZNF469	66.2433	66.646	334.846	1695.65	1.00608	5.06396
COQ8B	66.2433	66.646	357.532	541.909	1.00608	1.51569
ZNF292	127.042	127.829	3450.1	2565.33	1.0062	0.743552
RAI1	187.841	189.012	993.649	2776.19	1.00624	2.79393
TCF3	171.507	172.624	367.514	1172.31	1.00652	3.18985
TXNL4B	199.637	201.031	379.311	555.019	1.00698	1.46323
ELF4	44.4647	44.7949	394.737	620.573	1.00743	1.57212
ATM	133.394	134.385	1977.32	1763.39	1.00743	0.891809
TOMM7	127.949	128.922	431.035	434.838	1.0076	1.00882
YTHDF1	122.505	123.459	252.269	704.7	1.00779	2.79345
SMARCD2	122.505	123.459	189.655	248.011	1.00779	1.30769
TPBG	239.565	241.455	743.195	878.416	1.00789	1.18195
ERMAP	78.04	78.6642	381.126	324.49	1.008	0.851398
KLHL12	295.826	298.268	401.09	572.5	1.00826	1.42736
ZNF484	72.5954	73.2014	288.567	350.711	1.00835	1.21536
TPP1	173.321	174.809	294.011	451.226	1.00858	1.53472
PWWP2A	206.897	208.679	899.275	1541.6	1.00861	1.71427
[truncated: 7,943 more rows]

## Sheet: Effect of IE2 Depletion
Gene Name	Control Pause Region	dTAG Pause Region	Control Gene Body	dTAG Gene Body	dTAG Pause Region / Control Pause Region	dTAG Gene Body / Control Pause Region
ABCB1	33.0114	6.72687	68.7738	33.6344	0.203774	0.489058
HOXB7	35.7624	8.96916	169.184	124.447	0.250799	0.735574
HOXB9	35.7624	8.96916	93.5324	70.6322	0.250799	0.755162
DDX19B	46.7662	10.0903	851.42	651.385	0.215761	0.765058
BDKRB1	30.2605	14.5749	202.195	216.381	0.481648	1.07016
PSG9	33.0114	14.5749	92.1569	69.511	0.44151	0.754268
ABHD1	33.0114	14.5749	9.62834	8.96916	0.44151	0.931538
ESPL1	35.7624	16.8172	236.582	233.198	0.470248	0.985697
DLX3	28.885	17.9383	16.5057	12.3326	0.621025	0.747171
MTRNR2L6	48.1417	17.9383	16.5057	14.5749	0.372615	0.883021
VCAN	49.5172	17.9383	199.444	160.324	0.362265	0.803853
STK36	49.5172	17.9383	248.961	225.35	0.362265	0.905162
TIMM9	66.0229	17.9383	682.236	548.24	0.271699	0.803593
PDE7B	31.636	19.0595	204.946	176.02	0.602462	0.858859
FAM131C	35.7624	19.0595	79.7776	75.1167	0.532947	0.941576
PAPPA	39.8888	19.0595	5525.29	5091.12	0.477815	0.921422
MAPK10	39.8888	19.0595	309.482	319.526	0.477815	1.03245
SULT6B1	42.6398	19.0595	27.5095	19.0595	0.446988	0.692832
CIC	45.3907	19.0595	1741.35	1614.45	0.419898	0.927123
STARD10	46.7662	19.0595	350.747	313.921	0.407548	0.895007
ZNF540	42.6398	20.1806	88.0305	50.4515	0.473282	0.573114
TFPI2	42.6398	20.1806	89.406	53.815	0.473282	0.601917
ZNF260	46.7662	20.1806	433.275	352.04	0.431521	0.812508
GRID1	48.1417	20.1806	2229.65	2101.03	0.419192	0.942313
SESN1	50.8926	20.1806	1148.52	1000.06	0.396533	0.870737
ZNF827	44.0152	21.3018	1506.15	1429.46	0.483963	0.949084
ZNF221	48.1417	21.3018	178.812	128.932	0.442481	0.721046
SLC4A11	49.5172	21.3018	85.2795	78.4802	0.43019	0.92027
SRPX2	50.8926	21.3018	193.942	184.989	0.418563	0.953836
CLOCK	59.1455	21.3018	2334.18	2056.18	0.360159	0.880899
SPATA17	61.8964	21.3018	196.693	195.079	0.344152	0.991795
CPED1	74.2757	21.3018	1712.47	1615.57	0.286793	0.943416
HOXA3	37.1379	22.4229	281.973	225.35	0.603775	0.799192
RABL3	39.8888	22.4229	356.248	334.101	0.562135	0.937832
ZFHX3	45.3907	22.4229	6013.58	5581.06	0.493998	0.928076
ATOH8	49.5172	22.4229	237.957	207.412	0.452831	0.871634
ZNF790	56.3945	22.4229	966.96	802.74	0.397608	0.830169
HSP90B1	56.3945	22.4229	2034.33	1792.71	0.397608	0.881229
ATP8A1	39.8888	23.5441	781.271	578.511	0.590242	0.740474
C2	44.0152	23.5441	1097.63	1055	0.534907	0.961159
TMEM220	49.5172	23.5441	502.049	460.791	0.475473	0.91782
MKRN3	52.2681	23.5441	430.524	378.947	0.450448	0.880199
E2F2	52.2681	23.5441	173.31	199.564	0.450448	1.15148
UPRT	56.3945	23.5441	277.846	245.531	0.417488	0.883693
SELENOP	28.885	24.6652	23.3831	20.1806	0.85391	0.863043
RET	34.3869	24.6652	193.942	190.595	0.717284	0.98274
ZSWIM5	35.7624	24.6652	225.578	219.744	0.689697	0.974139
CPE	38.5133	24.6652	138.923	160.324	0.640433	1.15405
BBOF1	45.3907	24.6652	261.341	174.899	0.543397	0.669237
GRIK2	45.3907	24.6652	687.738	584.117	0.543397	0.84933
GRK4	45.3907	24.6652	313.609	289.255	0.543397	0.922345
HMGN5	46.7662	24.6652	130.67	84.0859	0.527415	0.643497
EBNA1BP2	48.1417	24.6652	418.145	362.13	0.512346	0.866039
SLC9A5	49.5172	24.6652	233.831	226.471	0.498114	0.968526
PHKA2	49.5172	24.6652	539.187	543.755	0.498114	1.00847
HEXIM2	56.3945	24.6652	397.513	274.681	0.437369	0.690998
IGF2BP3	63.2719	24.6652	1896.78	1703.02	0.389828	0.897847
PFKM	86.655	24.6652	697.367	609.903	0.284637	0.87458
SPOCD1	35.7624	25.7863	445.654	365.493	0.721046	0.820127
MTPAP	39.8888	25.7863	1079.75	922.703	0.646455	0.854553
TRAF3IP2	41.2643	25.7863	1281.94	1092	0.624907	0.851828
YPEL4	42.6398	25.7863	28.885	40.3612	0.604749	1.39731
AIM2	53.6436	25.7863	77.0267	48.2092	0.480698	0.625877
ZMYND12	55.0191	25.7863	66.0229	63.9053	0.46868	0.967926
PRDM7	55.0191	25.7863	12.3793	14.5749	0.46868	1.17736
TRMT1	64.6474	25.7863	442.903	364.372	0.398877	0.82269
CXCR4	35.7624	26.9075	15.1302	15.696	0.752396	1.03739
RASGRF2	42.6398	26.9075	1371.35	1248.96	0.631042	0.910749
MAP7D2	46.7662	26.9075	434.651	336.344	0.575362	0.773825
CFAP300	46.7662	26.9075	246.21	207.412	0.575362	0.842418
DTX3	46.7662	26.9075	116.916	107.63	0.575362	0.920579
PDCD1LG2	46.7662	26.9075	529.558	493.304	0.575362	0.931538
DHX30	52.2681	26.9075	2478.61	2317.41	0.514797	0.934963
BBS5	52.2681	26.9075	258.59	243.289	0.514797	0.940829
AC093899.2	52.2681	26.9075	368.628	348.676	0.514797	0.945876
GPI	52.2681	26.9075	1474.51	1417.13	0.514797	0.961083
HAUS4	56.3945	26.9075	141.674	105.388	0.477129	0.743874
PRDM1	56.3945	26.9075	965.585	833.011	0.477129	0.862701
KRT86	45.3907	28.0286	178.812	125.568	0.617497	0.702236
MANSC1	46.7662	28.0286	71.5248	82.9648	0.599335	1.15994
NDUFA10	48.1417	28.0286	2492.36	2353.28	0.582211	0.944198
AC091167.2	49.5172	28.0286	653.351	586.359	0.566039	0.897464
TTLL13P	49.5172	28.0286	34.3869	38.1189	0.566039	1.10853
RNLS	53.6436	28.0286	649.225	683.899	0.522497	1.05341
SERPING1	59.1455	28.0286	342.494	287.013	0.473893	0.83801
TMEM253	59.1455	28.0286	48.1417	40.3612	0.473893	0.838384
INTS9	75.6512	28.0286	1361.72	1280.35	0.370498	0.940242
SLC14A2	37.1379	29.1498	78.4022	76.2379	0.784907	0.972395
C1orf53	38.5133	29.1498	215.95	154.718	0.756875	0.716454
RAG1	41.2643	29.1498	64.6474	44.8458	0.706416	0.693699
KCNMA1	41.2643	29.1498	5200.68	5110.18	0.706416	0.982599
KCNN2	49.5172	29.1498	213.199	163.687	0.58868	0.767768
ACHE	50.8926	29.1498	324.612	239.925	0.57277	0.739112
ZFP64	52.2681	29.1498	1442.87	1379.01	0.557697	0.955737
ZEB2	55.0191	29.1498	3387.8	3178.45	0.529812	0.938204
HOXD11	59.1455	29.1498	218.701	172.656	0.492849	0.789464
TTC31	64.6474	29.1498	218.701	236.562	0.450904	1.08167
AC068946.1	67.3983	29.1498	1635.44	1530.36	0.4325	0.935749
GTF2IRD2	71.5248	29.1498	983.466	844.222	0.407548	0.858416
ZNF416	78.4022	29.1498	258.59	204.048	0.371798	0.789082
EIF3H	79.7776	29.1498	2647.79	2519.21	0.365388	0.951439
NEO1	41.2643	30.2709	1360.35	1370.04	0.733586	1.00713
KIAA0895	42.6398	30.2709	288.85	273.559	0.709922	0.947064
SERPINF1	45.3907	30.2709	215.95	181.626	0.666897	0.841054
NRP1	46.7662	30.2709	3788.06	3460.98	0.647282	0.913653
TMEM232	48.1417	30.2709	324.612	304.952	0.628788	0.939433
RAD9B	49.5172	30.2709	74.2757	60.5418	0.611322	0.815096
GRTP1	50.8926	30.2709	339.743	273.559	0.5948	0.805196
PRUNE1	52.2681	30.2709	222.827	235.441	0.579147	1.05661
CD302	55.0191	30.2709	265.467	220.866	0.55019	0.831989
AMN1	56.3945	30.2709	414.018	401.37	0.53677	0.96945
KCNJ12	56.3945	30.2709	222.827	236.562	0.53677	1.06164
TEX9	57.77	30.2709	343.869	272.438	0.52399	0.792273
CASP8	59.1455	30.2709	294.352	223.108	0.511804	0.757963
MDFIC	59.1455	30.2709	1291.57	1217.56	0.511804	0.942699
MMP1	63.2719	30.2709	349.371	261.227	0.478426	0.747706
IGBP1	64.6474	30.2709	551.566	524.696	0.468247	0.951284
TP53TG5	66.0229	30.2709	92.1569	71.7533	0.458491	0.778599
FNDC1	35.7624	31.3921	162.306	110.993	0.877796	0.683852
HSBP1L1	42.6398	31.3921	116.916	97.5396	0.736216	0.834275
DPYSL2	45.3907	31.3921	4548.7	4463.28	0.691597	0.981221
DGCR6	50.8926	31.3921	16.5057	14.5749	0.616829	0.883021
AC007326.4	50.8926	31.3921	66.0229	79.6013	0.616829	1.20566
ZNF518A	52.2681	31.3921	928.447	821.8	0.600597	0.885134
MAD2L1	53.6436	31.3921	236.582	197.322	0.585197	0.834052
TTC26	55.0191	31.3921	240.708	243.289	0.570567	1.01072
ZNF678	57.77	31.3921	1119.64	1095.36	0.543397	0.978315
C17orf100	63.2719	31.3921	130.67	109.872	0.496145	0.840836
SAMD9L	63.2719	31.3921	724.876	644.659	0.496145	0.889336
FAM241B	63.2719	31.3921	30.2605	32.5132	0.496145	1.07444
TBX5	64.6474	31.3921	1609.31	1513.55	0.485589	0.940495
ZNF454	66.0229	31.3921	147.176	134.537	0.475473	0.914126
CHD6	66.0229	31.3921	4133.31	4075.36	0.475473	0.985981
NDUFB11	67.3983	31.3921	37.1379	47.0881	0.465769	1.26793
IKBIP	74.2757	31.3921	409.892	366.615	0.422642	0.894417
UBXN6	75.6512	31.3921	649.225	718.654	0.414958	1.10694
IFI44L	77.0267	31.3921	1357.6	1330.8	0.407548	0.980262
ZNF608	79.7776	31.3921	1603.81	1438.43	0.393495	0.896885
GPX3	35.7624	32.5132	37.1379	34.7555	0.909145	0.935851
HFE	39.8888	32.5132	119.666	106.509	0.815096	0.890047
RBFOX1	44.0152	32.5132	502.049	417.066	0.738681	0.830728
CA12	45.3907	32.5132	130.67	143.507	0.716296	1.09823
CDC25C	48.1417	32.5132	145.801	115.478	0.675365	0.792027
HMX1	48.1417	32.5132	198.069	170.414	0.675365	0.860379
NIPSNAP3B	48.1417	32.5132	48.1417	45.967	0.675365	0.954827
TMEM56	50.8926	32.5132	290.226	257.863	0.638859	0.888493
TMEM56-RWDD3	50.8926	32.5132	786.773	705.2	0.638859	0.896321
BDH1	53.6436	32.5132	405.766	308.315	0.606097	0.759835
VPS50	53.6436	32.5132	1147.15	1076.3	0.606097	0.93824
NLRP10	56.3945	32.5132	96.2834	71.7533	0.576531	0.745231
GLIPR1	56.3945	32.5132	129.295	108.751	0.576531	0.84111
GLA	57.77	32.5132	123.793	105.388	0.562804	0.851322
ENKD1	57.77	32.5132	229.705	201.806	0.562804	0.878547
POU2F2	57.77	32.5132	949.079	910.37	0.562804	0.959214
SPC24	63.2719	32.5132	804.654	656.991	0.513865	0.816489
PTPRJ	66.0229	32.5132	1767.49	1713.11	0.492454	0.969235
NKAIN4	75.6512	32.5132	182.938	150.233	0.429778	0.821224
NPPC	34.3869	33.6344	6.87738	4.48458	0.978115	0.652077
TFCP2L1	34.3869	33.6344	72.9003	70.6322	0.978115	0.968888
ITGA11	44.0152	33.6344	757.888	674.929	0.764152	0.89054
RASAL2	44.0152	33.6344	2998.54	2827.53	0.764152	0.942969
PROCR	45.3907	33.6344	108.663	85.207	0.740996	0.784143
PER2	46.7662	33.6344	477.29	410.339	0.719202	0.859727
TMTC2	46.7662	33.6344	1032.98	989.971	0.719202	0.958362
IGSF9B	49.5172	33.6344	236.582	211.896	0.679247	0.895658
RILPL2	49.5172	33.6344	335.616	320.648	0.679247	0.955399
PLA2R1	50.8926	33.6344	795.025	753.41	0.660889	0.947655
PCNX2	50.8926	33.6344	1892.66	1838.68	0.660889	0.971481
CXADR	52.2681	33.6344	265.467	209.654	0.643497	0.789756
DTL	53.6436	33.6344	894.06	801.619	0.626997	0.896606
MRPL54	55.0191	33.6344	156.804	134.537	0.611322	0.857996
MMGT1	57.77	33.6344	89.406	86.3282	0.582211	0.965575
EXD2	59.1455	33.6344	562.57	447.337	0.568672	0.795167
CSTF2	64.6474	33.6344	174.686	139.022	0.520274	0.795842
NRDE2	70.1493	33.6344	928.447	932.793	0.479468	1.00468
FAM167A	71.5248	33.6344	715.248	750.046	0.470248	1.04865
CEP41	72.9003	33.6344	521.306	479.85	0.461375	0.920478
CHD9	77.0267	33.6344	6240.54	5704.39	0.436659	0.914086
ALG9	77.0267	33.6344	1625.81	1519.15	0.436659	0.934395
SCRN2	82.5286	33.6344	126.544	106.509	0.407548	0.841675
CHP1	34.3869	34.7555	715.248	691.747	1.01072	0.967143
FER1L6	46.7662	34.7555	239.333	205.17	0.743176	0.857256
PAIP2B	49.5172	34.7555	105.912	98.6608	0.701888	0.931538
GID8	49.5172	34.7555	506.175	484.335	0.701888	0.956852
EGR3	49.5172	34.7555	19.2567	25.7863	0.701888	1.33909
TMEM119	52.2681	34.7555	134.797	103.145	0.664947	0.765192
BMP1	53.6436	34.7555	704.244	652.507	0.647897	0.926535
DNAJC28	55.0191	34.7555	104.536	93.0551	0.631699	0.890171
TMEM200A	56.3945	34.7555	628.593	519.09	0.616292	0.825797
DYNC1I2	56.3945	34.7555	1848.64	1595.39	0.616292	0.863007
SLC16A7	56.3945	34.7555	1364.47	1291.56	0.616292	0.946563
GLIPR1L2	57.77	34.7555	53.6436	43.7247	0.601618	0.815096
ARHGAP24	57.77	34.7555	3565.24	3321.95	0.601618	0.931763
GSTM2	59.1455	34.7555	299.854	269.075	0.587627	0.897353
AP5M1	60.521	34.7555	621.715	585.238	0.574272	0.941328
SPA17	61.8964	34.7555	119.666	122.205	0.561511	1.02121
HCFC1	64.6474	34.7555	907.814	954.095	0.537616	1.05098
HSPA12B	66.0229	34.7555	295.727	238.804	0.526416	0.807514
SMIM30	70.1493	34.7555	78.4022	59.4207	0.49545	0.757896
MAGED2	71.5248	34.7555	426.398	297.104	0.485923	0.696776
FGD1	71.5248	34.7555	675.359	590.844	0.485923	0.874859
CUX1	71.5248	34.7555	7371.18	7213.45	0.485923	0.978602
MMACHC	72.9003	34.7555	222.827	219.744	0.476754	0.986165
PKIG	74.2757	34.7555	1020.6	1013.52	0.467925	0.993055
ZNF277	85.2795	34.7555	1019.23	1019.12	0.407548	0.999895
CFH	101.785	34.7555	426.398	436.126	0.341459	1.02281
ABLIM2	39.8888	35.8766	358.999	418.187	0.899416	1.16487
AP3B2	41.2643	35.8766	242.084	237.683	0.869436	0.98182
KDM6B	45.3907	35.8766	1048.11	1028.09	0.790396	0.980896
MRPL48	46.7662	35.8766	656.102	664.839	0.767149	1.01332
TNFRSF11A	49.5172	35.8766	81.1531	89.6916	0.72453	1.10521
DCAF1	50.8926	35.8766	2004.07	1861.1	0.704948	0.928661
SAMD9	52.2681	35.8766	412.643	384.553	0.686397	0.931926
MROH8	53.6436	35.8766	504.8	369.978	0.668797	0.73292
RHOD	56.3945	35.8766	116.916	132.295	0.636172	1.13154
SOCS2	57.77	35.8766	552.942	482.092	0.621025	0.871869
BNC1	59.1455	35.8766	303.98	245.531	0.606583	0.807719
XRCC1	61.8964	35.8766	662.98	505.637	0.579624	0.762673
AGO4	61.8964	35.8766	870.677	755.652	0.579624	0.86789
BORCS7-ASMT	61.8964	35.8766	507.551	460.791	0.579624	0.907871
NOS1AP	61.8964	35.8766	1825.26	1725.44	0.579624	0.945315
APOOL	61.8964	35.8766	595.581	588.601	0.579624	0.98828
BORCS7	61.8964	35.8766	105.912	110.993	0.579624	1.04798
PHC2	63.2719	35.8766	4137.43	3864.59	0.567023	0.934054
TCEAL7	64.6474	35.8766	48.1417	33.6344	0.554959	0.698654
CCDC163	67.3983	35.8766	103.161	89.6916	0.532308	0.869436
TMC7	67.3983	35.8766	584.578	576.269	0.532308	0.985787
SLC27A6	70.1493	35.8766	459.409	356.524	0.511433	0.776049
TCTN1	70.1493	35.8766	291.601	288.134	0.511433	0.988112
RNASEL	71.5248	35.8766	119.666	104.267	0.501597	0.871309
ZNF628	78.4022	35.8766	243.459	179.383	0.457598	0.73681
RNPC3	79.7776	35.8766	563.945	523.575	0.449708	0.928414
STAMBPL1	85.2795	35.8766	1488.27	1464.22	0.420695	0.98384
CHCHD5	90.7814	35.8766	221.452	158.081	0.395198	0.713842
ZBTB20	97.6588	35.8766	3756.43	3705.39	0.367367	0.986412
CYFIP2	35.7624	36.9978	704.244	651.385	1.03454	0.924943
EPHA7	38.5133	36.9978	52.2681	35.8766	0.960649	0.686397
EFCAB5	39.8888	36.9978	187.065	174.899	0.927523	0.934963
GCNT4	42.6398	36.9978	456.658	415.945	0.867683	0.910845
GABRQ	45.3907	36.9978	48.1417	47.0881	0.815096	0.978115
SET	46.7662	36.9978	1239.3	1114.42	0.791123	0.899229
FAM111B	46.7662	36.9978	108.663	124.447	0.791123	1.14526
AIP	49.5172	36.9978	182.938	149.112	0.747171	0.815096
ACOX2	49.5172	36.9978	147.176	119.963	0.747171	0.815096
LURAP1	49.5172	36.9978	116.916	100.903	0.747171	0.863043
COQ7	52.2681	36.9978	297.103	306.073	0.707846	1.03019
TRIQK	53.6436	36.9978	547.44	487.698	0.689697	0.890871
RBMS3	53.6436	36.9978	3933.86	3959.89	0.689697	1.00661
C2CD5	53.6436	36.9978	746.884	762.379	0.689697	1.02075
RNF167	55.0191	36.9978	332.865	293.74	0.672454	0.882459
WNT2	56.3945	36.9978	398.888	334.101	0.656053	0.837581
PPIP5K1	59.1455	36.9978	411.267	381.189	0.625539	0.926865
L1CAM	59.1455	36.9978	316.36	343.07	0.625539	1.08443
KIF3C	60.521	36.9978	471.788	470.881	0.611322	0.998077
DMAP1	60.521	36.9978	187.065	189.474	0.611322	1.01288
CDH13	60.521	36.9978	4057.66	4369.1	0.611322	1.07676
ADORA2B	61.8964	36.9978	347.996	292.619	0.597737	0.84087
HINT3	61.8964	36.9978	360.375	346.434	0.597737	0.961315
ZNF582	63.2719	36.9978	191.191	150.233	0.584743	0.785776
PRXL2A	63.2719	36.9978	382.382	325.132	0.584743	0.85028
HELB	64.6474	36.9978	248.961	234.319	0.572301	0.941188
EPDR1	64.6474	36.9978	206.321	211.896	0.572301	1.02702
AC007998.2	66.0229	36.9978	412.643	394.643	0.560378	0.956379
INO80C	66.0229	36.9978	397.513	381.189	0.560378	0.958936
KRBA1	68.7738	36.9978	324.612	324.011	0.537963	0.998147
TBKBP1	70.1493	36.9978	822.535	687.262	0.527415	0.835541
SLC26A11	74.2757	36.9978	867.926	702.958	0.498114	0.809929
MRPS28	75.6512	36.9978	1178.78	1080.78	0.489058	0.916864
NUP35	77.0267	36.9978	475.915	439.489	0.480324	0.923461
ZNF19	79.7776	36.9978	349.371	275.802	0.463761	0.789424
AC010547.4	79.7776	36.9978	1016.48	871.13	0.463761	0.857009
PRPF40B	81.1531	36.9978	436.026	420.429	0.455901	0.96423
PIGB	89.406	36.9978	387.884	352.04	0.413818	0.907589
GSTCD	100.41	36.9978	891.309	808.346	0.368468	0.90692
PCSK6	34.3869	38.1189	1005.47	948.489	1.10853	0.943326
PDLIM3	42.6398	38.1189	74.2757	44.8458	0.893976	0.603775
EN2	45.3907	38.1189	155.429	151.355	0.839796	0.973787
AGPAT4	45.3907	38.1189	1328.71	1357.71	0.839796	1.02182
NLGN1	46.7662	38.1189	467.662	384.553	0.815096	0.822288
SEPT6	46.7662	38.1189	425.022	350.918	0.815096	0.825647
DEPP1	48.1417	38.1189	184.314	153.597	0.791807	0.833344
CDC20	49.5172	38.1189	72.9003	81.8436	0.769813	1.12268
AR	50.8926	38.1189	911.941	811.709	0.749007	0.89009
CHCHD10	53.6436	38.1189	41.2643	31.3921	0.710596	0.760756
PTPRD	53.6436	38.1189	907.814	874.493	0.710596	0.963295
SYPL2	55.0191	38.1189	116.916	99.7819	0.692832	0.853453
KIAA1328	55.0191	38.1189	1299.83	1218.68	0.692832	0.937576
MVB12B	56.3945	38.1189	2119.61	2023.67	0.675933	0.954736
ZNF605	56.3945	38.1189	946.328	940.641	0.675933	0.993991
FAM180A	60.521	38.1189	412.643	384.553	0.629847	0.931926
SLC29A1	60.521	38.1189	88.0305	85.207	0.629847	0.967926
CCDC91	63.2719	38.1189	3431.81	3115.66	0.602462	0.907876
LARP7	64.6474	38.1189	601.083	423.793	0.589644	0.705049
ZNF671	66.0229	38.1189	210.448	196.2	0.57736	0.932299
WDR87	67.3983	38.1189	86.655	63.9053	0.565577	0.737468
CADPS2	67.3983	38.1189	508.926	492.183	0.565577	0.9671
FBXO6	70.1493	38.1189	231.08	221.987	0.543397	0.960649
ZNF524	74.2757	38.1189	381.007	347.555	0.513209	0.912201
ZNF155	75.6512	38.1189	334.241	274.681	0.503877	0.821805
MND1	75.6512	38.1189	301.229	264.59	0.503877	0.878368
MYC	77.0267	38.1189	2313.55	2160.45	0.49488	0.933823
CD83	78.4022	38.1189	67.3983	58.2996	0.486198	0.865
NUP107	79.7776	38.1189	789.524	734.35	0.477815	0.930118
AKNA	81.1531	38.1189	2830.73	2610.03	0.469716	0.922033
TFCP2	81.1531	38.1189	1242.06	1214.2	0.469716	0.977574
GREM2	85.2795	38.1189	729.003	755.652	0.446988	1.03656
SP1	35.7624	39.2401	1269.56	1208.59	1.09724	0.951976
BOK	42.6398	39.2401	258.59	247.773	0.92027	0.958171
DNM3	44.0152	39.2401	889.933	765.742	0.891511	0.860449
EMX2	45.3907	39.2401	229.705	182.747	0.864496	0.795573
FRAS1	45.3907	39.2401	2319.05	2114.48	0.864496	0.911786
EVA1A	46.7662	39.2401	1104.51	982.123	0.839069	0.889196
CYGB	52.2681	39.2401	295.727	215.26	0.750746	0.7279
ATRNL1	52.2681	39.2401	1053.62	896.916	0.750746	0.851275
WFDC3	55.0191	39.2401	110.038	112.115	0.713209	1.01887
NXPE3	57.77	39.2401	757.888	622.236	0.679247	0.821013
TMEM9	57.77	39.2401	533.685	491.062	0.679247	0.920134
SERPINB2	59.1455	39.2401	343.869	294.861	0.66345	0.857481
ZNF214	59.1455	39.2401	174.686	155.839	0.66345	0.892113
TBX18	59.1455	39.2401	1826.63	1745.62	0.66345	0.955651
DENND2A	61.8964	39.2401	1288.82	1188.41	0.633964	0.922094
CXorf56	61.8964	39.2401	180.187	178.262	0.633964	0.989315
LMTK3	63.2719	39.2401	129.295	117.72	0.620182	0.910479
WDR19	63.2719	39.2401	917.443	908.128	0.620182	0.989847
SKA2	68.7738	39.2401	836.29	702.958	0.570567	0.840568
LAMA3	68.7738	39.2401	2379.57	2521.46	0.570567	1.05962
ZBTB3	72.9003	39.2401	138.923	132.295	0.538271	0.95229
SP2	74.2757	39.2401	905.064	742.198	0.528303	0.820051
TRABD2A	75.6512	39.2401	330.114	293.74	0.518697	0.889813
CDKN2A	75.6512	39.2401	737.255	667.081	0.518697	0.904817
TSNARE1	77.0267	39.2401	2357.57	2405.98	0.509435	1.02053
PPIG	78.4022	39.2401	1280.57	1273.62	0.500498	0.994575
PRKCH	82.5286	39.2401	1090.75	959.7	0.475473	0.879851
IQCG	82.5286	39.2401	577.7	542.634	0.475473	0.939301
SPON2	38.5133	40.3612	220.076	219.744	1.04798	0.998493
FAM49A	45.3907	40.3612	221.452	141.264	0.889196	0.637901
SPR	49.5172	40.3612	56.3945	52.6938	0.815096	0.934378
NFATC1	50.8926	40.3612	1657.45	1618.93	0.793066	0.976762
DBF4B	52.2681	40.3612	493.796	430.52	0.772196	0.871857
IQSEC2	55.0191	40.3612	508.926	442.852	0.733586	0.87017
BDH2	56.3945	40.3612	226.954	189.474	0.715694	0.834856
HERC3	57.77	40.3612	960.083	855.434	0.698654	0.891
HIPK2	57.77	40.3612	3374.04	3142.57	0.698654	0.931396
C11orf74	57.77	40.3612	349.371	327.374	0.698654	0.937039
SPEF2	57.77	40.3612	808.78	790.407	0.698654	0.977283
PTPN3	59.1455	40.3612	530.934	525.817	0.682406	0.990363
BUB1	59.1455	40.3612	270.969	279.165	0.682406	1.03025
CEP152	60.521	40.3612	741.382	677.172	0.666897	0.913391
MAP9	61.8964	40.3612	247.586	214.139	0.652077	0.864907
MLLT6	61.8964	40.3612	1317.71	1256.8	0.652077	0.953781
TBL1X	61.8964	40.3612	5368.48	5239.11	0.652077	0.975901
ZNF256	61.8964	40.3612	123.793	125.568	0.652077	1.01434
LPAR6	63.2719	40.3612	46.7662	44.8458	0.637901	0.958936
ZNF668	64.6474	40.3612	621.715	515.727	0.624329	0.829522
ZNF692	64.6474	40.3612	349.371	369.978	0.624329	1.05898
RBPJ	66.0229	40.3612	3675.27	3334.29	0.611322	0.907221
LIMA1	68.7738	40.3612	1444.25	1346.5	0.586869	0.932314
DOK1	68.7738	40.3612	90.7814	96.4185	0.586869	1.06209
AC003006.1	70.1493	40.3612	1814.25	1645.84	0.575362	0.907173
ZNF551	70.1493	40.3612	741.382	697.352	0.575362	0.940612
PKIB	71.5248	40.3612	171.935	126.689	0.564297	0.736847
BACH2	75.6512	40.3612	1946.3	1950.79	0.533517	1.00231
CDK9	79.7776	40.3612	744.133	605.418	0.505922	0.813589
COPS7B	79.7776	40.3612	581.827	523.575	0.505922	0.899881
ELOVL6	82.5286	40.3612	1464.88	1214.2	0.489058	0.828872
AC012309.1	83.9041	40.3612	1169.16	1009.03	0.48104	0.863043
MAJIN	45.3907	41.4824	64.6474	71.7533	0.913895	1.10992
TRMT2B	49.5172	41.4824	466.287	468.639	0.837737	1.00504
PRPF40A	52.2681	41.4824	2391.95	2040.48	0.793646	0.853062
GSTM1	53.6436	41.4824	129.295	108.751	0.773296	0.84111
CRYZ	53.6436	41.4824	239.333	214.139	0.773296	0.894732
DZANK1	53.6436	41.4824	292.976	276.923	0.773296	0.945205
PFN2	55.0191	41.4824	584.578	456.306	0.753964	0.780574
H2AFY2	56.3945	41.4824	738.631	609.903	0.735574	0.825721
PICK1	56.3945	41.4824	283.348	294.861	0.735574	1.04063
ITPKB	57.77	41.4824	1749.61	1873.43	0.718061	1.07077
SAMD14	59.1455	41.4824	357.624	300.467	0.701362	0.840176
HMMR	59.1455	41.4824	180.187	171.535	0.701362	0.951982
OGFOD3	59.1455	41.4824	320.486	330.738	0.701362	1.03199
BEND3	61.8964	41.4824	774.393	685.02	0.67019	0.884589
WNT5A	61.8964	41.4824	1735.85	1586.42	0.67019	0.913915
SLC25A14	61.8964	41.4824	148.551	137.901	0.67019	0.928304
COL13A1	61.8964	41.4824	1261.31	1297.17	0.67019	1.02843
CCDC83	63.2719	41.4824	34.3869	19.0595	0.655621	0.554265
ARMCX6	63.2719	41.4824	86.655	114.357	0.655621	1.31968
SERHL2	64.6474	41.4824	68.7738	57.1784	0.641671	0.831398
AL445524.2	66.0229	41.4824	1485.51	1291.56	0.628303	0.869436
ZNF774	67.3983	41.4824	288.85	235.441	0.615481	0.815096
HAUS7	70.1493	41.4824	268.218	285.892	0.591344	1.06589
TREX2	70.1493	41.4824	346.62	375.584	0.591344	1.08356
THRA	77.0267	41.4824	590.079	488.819	0.538546	0.828396
SHLD1	77.0267	41.4824	497.922	426.035	0.538546	0.855626
STMN3	78.4022	41.4824	266.842	216.381	0.529097	0.810894
NAGK	82.5286	41.4824	799.152	709.685	0.502642	0.888048
MB	83.9041	41.4824	217.325	192.837	0.494402	0.88732
ZNF641	92.1569	41.4824	370.003	281.407	0.450128	0.760554
GHDC	93.5324	41.4824	121.042	113.236	0.443508	0.935508
GSAP	97.6588	41.4824	466.287	485.456	0.424768	1.04111
CRIP1	37.1379	42.6035	19.2567	21.3018	1.14717	1.1062
ARL15	45.3907	42.6035	1865.15	1585.3	0.938595	0.84996
GATA3	45.3907	42.6035	151.302	131.174	0.938595	0.866966
ABI3BP	49.5172	42.6035	1063.24	1090.87	0.860379	1.02599
ZRANB3	56.3945	42.6035	1492.39	1538.21	0.755455	1.0307
CCDC34	56.3945	42.6035	126.544	136.78	0.755455	1.08089
TNK2	56.3945	42.6035	577.7	631.205	0.755455	1.09262
LRRC10B	56.3945	42.6035	9.62834	15.696	0.755455	1.63019
CELSR1	57.77	42.6035	889.933	822.921	0.737468	0.924699
CIT	57.77	42.6035	993.094	1024.73	0.737468	1.03185
HSD11B1L	59.1455	42.6035	123.793	76.2379	0.720317	0.61585
CXorf40B	59.1455	42.6035	171.935	164.808	0.720317	0.958553
IRX3	59.1455	42.6035	138.923	143.507	0.720317	1.03299
NPHP4	60.521	42.6035	711.121	809.467	0.703946	1.1383
PANX2	64.6474	42.6035	162.306	158.081	0.659014	0.973971
RAB3IP	67.3983	42.6035	550.191	491.062	0.632115	0.89253
TAP1	68.7738	42.6035	1156.78	1065.09	0.619473	0.920739
POGLUT2	70.1493	42.6035	123.793	102.024	0.607326	0.824153
ELP6	71.5248	42.6035	536.436	498.91	0.595647	0.930045
PARP10	71.5248	42.6035	324.612	329.617	0.595647	1.01542
TRIM61	72.9003	42.6035	270.969	206.291	0.584408	0.761308
IPO8	72.9003	42.6035	984.841	802.74	0.584408	0.815096
APOPT1	72.9003	42.6035	1328.71	1223.17	0.584408	0.920569
AL139300.1	72.9003	42.6035	4814.17	4540.64	0.584408	0.943182
AL117339.5	74.2757	42.6035	1850.02	1676.11	0.573586	0.905999
ZNF37A	74.2757	42.6035	1416.74	1297.17	0.573586	0.915598
L3MBTL1	77.0267	42.6035	795.025	701.837	0.553101	0.882786
ZNF350	81.1531	42.6035	442.903	395.764	0.524977	0.893568
MSANTD3	82.5286	42.6035	1191.16	1025.85	0.516227	0.861216
SDSL	82.5286	42.6035	209.072	200.685	0.516227	0.959883
POT1	83.9041	42.6035	839.041	804.982	0.507765	0.959408
ALPK1	101.785	42.6035	1103.13	1005.67	0.418563	0.911647
ZNF487	105.912	42.6035	169.184	169.293	0.402255	1.00065
TRAPPC13	115.54	42.6035	675.359	549.361	0.368734	0.813436
SHLD3	115.54	42.6035	116.916	98.6608	0.368734	0.843864
SCML2	44.0152	43.7247	503.424	463.033	0.993398	0.919767
EPB41L3	46.7662	43.7247	1844.51	1833.07	0.934963	0.993797
MDGA1	48.1417	43.7247	264.091	287.013	0.90825	1.08679
PAICS	49.5172	43.7247	759.263	668.203	0.883021	0.880067
AC087632.1	49.5172	43.7247	2464.85	2232.2	0.883021	0.905612
PTGR1	52.2681	43.7247	847.294	746.683	0.836546	0.881256
DLL1	52.2681	43.7247	189.816	174.899	0.836546	0.921413
SLC25A53	53.6436	43.7247	506.175	441.731	0.815096	0.872684
ALKBH8	56.3945	43.7247	618.964	598.692	0.775335	0.967247
TMEM238	57.77	43.7247	173.31	162.566	0.756875	0.938007
PNMA2	57.77	43.7247	221.452	230.956	0.756875	1.04292
CEP55	59.1455	43.7247	284.724	234.319	0.739273	0.822971
GAS2	60.521	43.7247	228.329	189.474	0.722471	0.829827
PSCA	60.521	43.7247	592.83	506.758	0.722471	0.854811
HYI	60.521	43.7247	100.41	123.326	0.722471	1.22823
CFAP298	61.8964	43.7247	623.091	562.815	0.706416	0.903263
C21orf59-TCP10L	61.8964	43.7247	650.6	602.055	0.706416	0.925384
SH3PXD2A	63.2719	43.7247	4841.68	4585.48	0.69106	0.947086
RGS9	66.0229	43.7247	577.7	516.848	0.662265	0.894665
MAPK8IP2	66.0229	43.7247	452.532	460.791	0.662265	1.01825
GTF3C2	67.3983	43.7247	804.654	693.989	0.64875	0.862469
STAT5A	70.1493	43.7247	240.708	210.775	0.623309	0.875646
SLC25A20	70.1493	43.7247	258.59	260.106	0.623309	1.00586
SKIDA1	71.5248	43.7247	634.095	503.394	0.611322	0.793879
ACOT1	71.5248	43.7247	121.042	117.72	0.611322	0.972558
CLHC1	72.9003	43.7247	814.282	687.262	0.599788	0.84401
CLSTN2	74.2757	43.7247	357.624	336.344	0.58868	0.940495
C3orf70	75.6512	43.7247	290.226	280.286	0.577977	0.965753
KLC4	75.6512	43.7247	185.689	211.896	0.577977	1.14113
SH3BP5L	77.0267	43.7247	667.106	603.176	0.567656	0.904168
ALG13	77.0267	43.7247	840.416	875.614	0.567656	1.04188
TOX	78.4022	43.7247	1107.26	992.214	0.557697	0.896099
PLD1	79.7776	43.7247	1323.21	1170.48	0.548082	0.884574
MAPK3	82.5286	43.7247	225.578	221.987	0.529812	0.984079
NUDT9	86.655	43.7247	645.098	553.846	0.504583	0.858545
PCED1A	88.0305	43.7247	240.708	248.894	0.496699	1.03401
AP001273.2	99.0343	43.7247	1834.89	1683.96	0.44151	0.917747
C11orf54	99.0343	43.7247	375.505	356.524	0.44151	0.949452
DCTN6	108.663	43.7247	506.175	463.033	0.402389	0.914768
MBP	38.5133	44.8458	1045.36	1099.84	1.16442	1.05212
GLI2	45.3907	44.8458	2519.87	2582	0.987995	1.02465
SMYD5	49.5172	44.8458	396.137	332.98	0.905662	0.840568
TMOD2	50.8926	44.8458	331.49	301.588	0.881185	0.909796
RNF122	50.8926	44.8458	136.172	144.628	0.881185	1.06209
PDZD11	50.8926	44.8458	38.5133	48.2092	0.881185	1.25175
UBXN11	52.2681	44.8458	353.497	340.828	0.857996	0.96416
CDC25A	53.6436	44.8458	486.919	476.487	0.835996	0.978576
GUCD1	55.0191	44.8458	755.137	683.899	0.815096	0.905662
BFSP1	56.3945	44.8458	191.191	174.899	0.795216	0.914784
ATRAID	57.77	44.8458	673.983	538.15	0.776282	0.798461
CNTRL	57.77	44.8458	1133.39	1015.76	0.776282	0.89621
TYRO3	60.521	44.8458	460.785	368.857	0.740996	0.800497
CDK14	60.521	44.8458	4523.94	4279.41	0.740996	0.945947
TRPS1	60.521	44.8458	4030.15	3884.77	0.740996	0.963927
ITGB3	61.8964	44.8458	436.026	365.493	0.72453	0.838237
ZSCAN5A	61.8964	44.8458	947.703	864.403	0.72453	0.912103
SCML1	61.8964	44.8458	237.957	227.592	0.72453	0.956442
FANCF	63.2719	44.8458	182.938	137.901	0.708779	0.753811
TFPT	63.2719	44.8458	266.842	247.773	0.708779	0.928537
ZNF814	66.0229	44.8458	1356.22	1325.19	0.679247	0.977123
XRCC4	66.0229	44.8458	790.899	828.526	0.679247	1.04758
HAS3	66.0229	44.8458	71.5248	87.4493	0.679247	1.22264
FAM174A	67.3983	44.8458	328.739	335.222	0.665384	1.01972
ADGRV1	68.7738	44.8458	169.184	139.022	0.652077	0.821723
CTDSP1	68.7738	44.8458	1089.38	948.489	0.652077	0.870671
SUGCT	68.7738	44.8458	1140.27	1006.79	0.652077	0.882939
UFSP2	70.1493	44.8458	389.26	306.073	0.639291	0.786294
ZSCAN30	70.1493	44.8458	705.619	660.355	0.639291	0.935851
ADGRE3	70.1493	44.8458	70.1493	79.6013	0.639291	1.13474
WDR13	71.5248	44.8458	481.417	417.066	0.626997	0.866331
CEP44	72.9003	44.8458	591.455	513.485	0.615167	0.868172
ATF7-NPFF	72.9003	44.8458	2112.73	1941.82	0.615167	0.919106
ATF7	72.9003	44.8458	2057.71	1900.34	0.615167	0.923521
EEF2K	72.9003	44.8458	862.424	811.709	0.615167	0.941195
MB21D2	72.9003	44.8458	997.22	979.881	0.615167	0.982612
TGIF2-RAB5IF	74.2757	44.8458	1485.51	1185.05	0.603775	0.797737
TGIF2	74.2757	44.8458	667.106	550.482	0.603775	0.82518
PRKD2	74.2757	44.8458	1030.23	1030.33	0.603775	1.0001
FUOM	75.6512	44.8458	72.9003	51.5727	0.592797	0.707442
ACSS1	75.6512	44.8458	617.589	598.692	0.592797	0.969401
WBP2NL	75.6512	44.8458	167.808	190.595	0.592797	1.13579
ZNF546	83.9041	44.8458	543.313	497.789	0.534489	0.916209
PRDM5	86.655	44.8458	1361.72	1245.59	0.517521	0.914719
ZNF85	89.406	44.8458	390.635	359.888	0.501597	0.921288
SPOPL	100.41	44.8458	962.834	780.317	0.446628	0.810438
APIP	101.785	44.8458	876.179	803.861	0.440592	0.917463
ZNF613	105.912	44.8458	364.501	346.434	0.423426	0.950433
KRR1	114.165	44.8458	634.095	570.663	0.392817	0.899965
CENPE	44.0152	45.967	452.532	405.855	1.04434	0.896853
POLR3G	45.3907	45.967	130.67	107.63	1.01269	0.823676
HSPB8	46.7662	45.967	324.612	330.738	0.98291	1.01887
MRPL23	50.8926	45.967	639.597	633.447	0.903214	0.990385
PRUNE2	53.6436	45.967	548.815	495.546	0.856896	0.902938
CEP162	55.0191	45.967	614.838	593.086	0.835473	0.964621
SARS2	55.0191	45.967	247.586	253.379	0.835473	1.0234
ST6GAL1	56.3945	45.967	2142.99	2007.97	0.815096	0.936994
SFRP2	57.77	45.967	119.666	102.024	0.795689	0.852572
TEDC2	59.1455	45.967	137.548	100.903	0.777184	0.733586
EREG	60.521	45.967	548.815	514.606	0.759521	0.937667
ZNF569	63.2719	45.967	473.164	433.883	0.726499	0.916983
RFC1	63.2719	45.967	1492.39	1398.07	0.726499	0.936797
ILVBL	64.6474	45.967	451.156	369.978	0.711041	0.820066
HSD17B4	64.6474	45.967	1134.77	1002.3	0.711041	0.883268
PTPN14	64.6474	45.967	3087.94	2927.31	0.711041	0.94798
MICB	66.0229	45.967	405.766	353.161	0.696228	0.870357
MSH2	67.3983	45.967	1452.5	1382.37	0.682019	0.951717
HPRT1	68.7738	45.967	492.421	459.67	0.668379	0.93349
MIPOL1	68.7738	45.967	1096.25	1081.91	0.668379	0.98691
PSMD10	70.1493	45.967	181.563	131.174	0.655273	0.722471
PIGU	70.1493	45.967	1097.63	1092	0.655273	0.994866
FZD3	70.1493	45.967	287.475	294.861	0.655273	1.02569
FRG1	72.9003	45.967	429.149	338.586	0.630546	0.788971
PRPS1	74.2757	45.967	235.206	206.291	0.618869	0.877062
COG7	74.2757	45.967	848.669	774.711	0.618869	0.912855
TPM4	75.6512	45.967	2596.9	2365.62	0.607617	0.910939
SEC23B	81.1531	45.967	1778.49	1577.45	0.566423	0.886961
ARL16	83.9041	45.967	231.08	195.079	0.547851	0.844206
ITFG2	92.1569	45.967	972.462	1023.61	0.49879	1.05259
ZBTB8OS	94.9079	45.967	1741.35	1403.67	0.484332	0.806082
GGA1	94.9079	45.967	1298.45	1133.48	0.484332	0.872947
AL163195.3	114.165	45.967	33.0114	14.5749	0.402638	0.44151
RNASE11	114.165	45.967	33.0114	14.5749	0.402638	0.44151
PLTP	39.8888	47.0881	165.057	115.478	1.18048	0.699624
CALCOCO1	49.5172	47.0881	1049.49	914.855	0.950945	0.871715
ANKH	52.2681	47.0881	2107.23	1955.28	0.900896	0.92789
LTBP3	52.2681	47.0881	543.313	604.297	0.900896	1.11224
KCNG3	53.6436	47.0881	176.061	149.112	0.877796	0.846936
SLC22A5	56.3945	47.0881	441.528	386.795	0.834976	0.876038
ANKRD36C	57.77	47.0881	1536.41	1509.06	0.815096	0.982202
TMEM164	60.521	47.0881	1027.48	1006.79	0.778046	0.979861
SMKR1	60.521	47.0881	20.6321	26.9075	0.778046	1.30415
ZC3H11B	61.8964	47.0881	44.0152	35.8766	0.760756	0.815096
CASP4	61.8964	47.0881	638.221	533.665	0.760756	0.836176
SPIRE2	61.8964	47.0881	349.371	307.194	0.760756	0.879277
FAM234B	63.2719	47.0881	913.316	720.896	0.744218	0.789317
YIPF2	63.2719	47.0881	191.191	178.262	0.744218	0.932376
LRRC29	64.6474	47.0881	675.359	624.478	0.728384	0.924661
ONECUT2	64.6474	47.0881	202.195	198.443	0.728384	0.981442
HIP1	64.6474	47.0881	1272.32	1273.62	0.728384	1.00103
NIPSNAP1	66.0229	47.0881	341.118	338.586	0.713209	0.992576
IQCE	67.3983	47.0881	695.991	639.053	0.698654	0.918191
NHSL1	67.3983	47.0881	1906.41	1839.8	0.698654	0.965059
IFI27	67.3983	47.0881	416.769	428.278	0.698654	1.02761
SIRPA	71.5248	47.0881	1431.87	1198.5	0.658347	0.83702
INO80B	72.9003	47.0881	144.425	121.084	0.645925	0.838384
INO80B-WBP1	72.9003	47.0881	1327.33	1177.2	0.645925	0.886892
DEPDC1	75.6512	47.0881	235.206	218.623	0.622437	0.929495
DHX38	75.6512	47.0881	537.811	515.727	0.622437	0.958936
ZBTB38	75.6512	47.0881	2535	2645.9	0.622437	1.04375
PLAC9	75.6512	47.0881	118.291	125.568	0.622437	1.06152
LACC1	77.0267	47.0881	232.456	172.656	0.611322	0.74275
ZNF444	77.0267	47.0881	493.796	411.46	0.611322	0.83326
LEKR1	77.0267	47.0881	288.85	260.106	0.611322	0.900487
CRADD	79.7776	47.0881	1151.27	1040.42	0.590242	0.903714
MVB12A	79.7776	47.0881	453.907	437.247	0.590242	0.963295
EDC3	81.1531	47.0881	1065.99	984.366	0.580238	0.923425
SCAMP5	83.9041	47.0881	358.999	294.861	0.561214	0.821342
NIPAL3	83.9041	47.0881	843.167	780.317	0.561214	0.92546
NRL	85.2795	47.0881	517.179	386.795	0.552162	0.747894
MYLPF	86.655	47.0881	290.226	245.531	0.543397	0.846
HAUS5	89.406	47.0881	204.946	195.079	0.526677	0.951857
ZFAND2B	92.1569	47.0881	75.6512	76.2379	0.510956	1.00775
ATP23	93.5324	47.0881	281.973	243.289	0.503442	0.862809
S100A2	93.5324	47.0881	86.655	84.0859	0.503442	0.970352
ECM1	99.0343	47.0881	151.302	123.326	0.475473	0.815096
UNK	103.161	47.0881	1224.17	1093.12	0.456454	0.892942
DDX20	111.414	47.0881	284.724	292.619	0.422642	1.02773
FLRT3	45.3907	48.2092	48.1417	31.3921	1.06209	0.652077
STON2	52.2681	48.2092	727.627	711.927	0.922345	0.978423
HRK	53.6436	48.2092	412.643	377.826	0.898696	0.915624
DEPDC1B	56.3945	48.2092	467.662	435.004	0.854857	0.930168
CENPL	59.1455	48.2092	411.267	349.797	0.815096	0.850535
SLC6A17	59.1455	48.2092	281.973	257.863	0.815096	0.914498
OCIAD2	59.1455	48.2092	233.831	215.26	0.815096	0.920579
CDNF	60.521	48.2092	232.456	188.352	0.796571	0.810273
AFAP1L1	60.521	48.2092	455.283	387.916	0.796571	0.852034
C6orf136	60.521	48.2092	220.076	197.322	0.796571	0.896606
SLC40A1	60.521	48.2092	34.3869	34.7555	0.796571	1.01072
SPATA5	61.8964	48.2092	3556.98	3260.29	0.778869	0.916589
COL8A2	61.8964	48.2092	253.088	244.41	0.778869	0.965711
CENPF	61.8964	48.2092	726.252	737.714	0.778869	1.01578
AURKA	64.6474	48.2092	295.727	257.863	0.745726	0.871963
OLFML3	64.6474	48.2092	262.716	229.835	0.745726	0.874841
SEC14L2	64.6474	48.2092	817.033	752.289	0.745726	0.920757
BAZ2A	64.6474	48.2092	2154	2010.21	0.745726	0.933248
PLA2G4C	66.0229	48.2092	524.057	509	0.73019	0.971269
DNAJC17	67.3983	48.2092	825.286	759.015	0.715288	0.9197
GMPR2	67.3983	48.2092	251.712	252.258	0.715288	1.00217
INSIG2	67.3983	48.2092	292.976	302.709	0.715288	1.03322
EHD3	67.3983	48.2092	591.455	633.447	0.715288	1.071
CCDC36	68.7738	48.2092	258.59	211.896	0.700983	0.819432
ZNF747	70.1493	48.2092	414.018	315.042	0.687238	0.760937
AC002310.4	70.1493	48.2092	1931.17	1564	0.687238	0.809871
C16orf74	71.5248	48.2092	682.236	594.207	0.674022	0.870969
SNRNP35	71.5248	48.2092	447.03	418.187	0.674022	0.935479
DOCK3	74.2757	48.2092	3704.16	3378.01	0.649058	0.911951
PLXND1	74.2757	48.2092	1397.48	1411.52	0.649058	1.01005
NPRL3	74.2757	48.2092	1290.2	1320.71	0.649058	1.02365
HOXA13	75.6512	48.2092	204.946	184.989	0.637257	0.902623
FNDC10	77.0267	48.2092	59.1455	54.9361	0.625877	0.92883
CEP19	77.0267	48.2092	122.417	114.357	0.625877	0.934155
ZBTB22	77.0267	48.2092	276.471	269.075	0.625877	0.973249
ARMC6	77.0267	48.2092	639.597	650.264	0.625877	1.01668
CHST3	78.4022	48.2092	1096.25	1024.73	0.614897	0.934752
SGCE	78.4022	48.2092	676.734	680.535	0.614897	1.00562
SMCO4	81.1531	48.2092	493.796	377.826	0.594053	0.765146
C1orf159	81.1531	48.2092	694.616	710.806	0.594053	1.02331
PET100	81.1531	48.2092	46.7662	56.0573	0.594053	1.19867
THOC7	82.5286	48.2092	627.217	612.145	0.584152	0.97597
ERBB2	83.9041	48.2092	828.037	742.198	0.574576	0.896335
FAM124A	85.2795	48.2092	328.739	308.315	0.565308	0.937872
TCF19	86.655	48.2092	248.961	201.806	0.556335	0.810593
PPIP5K2	86.655	48.2092	1028.86	912.612	0.556335	0.887016
KIF3A	88.0305	48.2092	371.379	340.828	0.547643	0.917738
FAM192A	89.406	48.2092	872.052	849.828	0.539217	0.974515
ING3	90.7814	48.2092	426.398	417.066	0.531047	0.978115
HSPBP1	93.5324	48.2092	221.452	220.866	0.515428	0.997353
SYNJ2BP	94.9079	48.2092	555.693	495.546	0.507958	0.891763
SYNJ2BP-COX16	94.9079	48.2092	1474.51	1364.43	0.507958	0.925347
OSCAR	101.785	48.2092	118.291	81.8436	0.473637	0.691884
EBF1	101.785	48.2092	1851.39	1790.47	0.473637	0.967094
FOXD2	44.0152	49.3304	31.636	38.1189	1.12076	1.20492
ITPKA	45.3907	49.3304	81.1531	72.8744	1.08679	0.897987
TSPAN13	52.2681	49.3304	111.414	81.8436	0.943795	0.734593
MYO18A	52.2681	49.3304	1657.45	1629.02	0.943795	0.98285
SLC25A22	56.3945	49.3304	129.295	156.96	0.874737	1.21397
RBBP8	57.77	49.3304	1276.44	1133.48	0.85391	0.887998
ALKBH7	57.77	49.3304	53.6436	59.4207	0.85391	1.10769
TM9SF2	63.2719	49.3304	1962.8	1731.05	0.779657	0.881926
ACRBP	63.2719	49.3304	218.701	207.412	0.779657	0.948382
C1orf122	64.6474	49.3304	110.038	79.6013	0.763069	0.723398
EDA2R	66.0229	49.3304	513.053	502.273	0.747171	0.978989
ZFHX2	67.3983	49.3304	1096.25	902.522	0.731923	0.823278
SH3BP1	67.3983	49.3304	177.436	154.718	0.731923	0.871963
Z83844.3	67.3983	49.3304	911.941	821.8	0.731923	0.901154
BBS9	67.3983	49.3304	2105.85	1967.61	0.731923	0.934352
MMP19	68.7738	49.3304	99.0343	81.8436	0.717284	0.826417
PECR	74.2757	49.3304	607.961	539.271	0.664152	0.887016
SLC44A2	75.6512	49.3304	504.8	478.729	0.652077	0.948354
ZNF598	75.6512	49.3304	580.451	649.143	0.652077	1.11834
MINDY4	78.4022	49.3304	1363.1	1372.28	0.629197	1.00674
HSD17B7	79.7776	49.3304	181.563	239.925	0.618349	1.32144
ALG3	81.1531	49.3304	612.087	535.907	0.607868	0.875541
OSBPL11	81.1531	49.3304	949.079	863.282	0.607868	0.9096
ZNF710	82.5286	49.3304	1482.76	1403.67	0.597737	0.946661
IMMP1L	85.2795	49.3304	968.335	812.83	0.578455	0.83941
ADAMTS10	88.0305	49.3304	1004.1	940.641	0.560378	0.936802
ZSCAN16	89.406	49.3304	108.663	69.511	0.551757	0.639696
HEATR6	89.406	49.3304	558.443	478.729	0.551757	0.857256
SENP1	92.1569	49.3304	1103.13	942.883	0.535287	0.854733
SNAP23	94.9079	49.3304	1185.66	912.612	0.519771	0.769708
SH3GL2	104.536	49.3304	398.888	395.764	0.471898	0.992168
PCDH19	37.1379	50.4515	57.77	47.0881	1.35849	0.815096
C9orf85	39.8888	50.4515	851.42	772.469	1.2648	0.907272
ZNF341	46.7662	50.4515	496.547	493.304	1.0788	0.993469
MARK1	50.8926	50.4515	1741.35	1583.06	0.991333	0.909096
CDC42EP5	52.2681	50.4515	163.682	134.537	0.965245	0.821945
ZNF471	52.2681	50.4515	273.72	261.227	0.965245	0.954359
REXO5	55.0191	50.4515	339.743	324.011	0.916983	0.953695
SH2D4A	55.0191	50.4515	1702.84	1649.2	0.916983	0.968503
MAP4K4	55.0191	50.4515	9101.53	8878.35	0.916983	0.975479
CTSH	57.77	50.4515	198.069	170.414	0.873317	0.860379
DPF1	61.8964	50.4515	145.801	113.236	0.815096	0.776648
SLC7A8	61.8964	50.4515	305.356	261.227	0.815096	0.855484
GALNT7	61.8964	50.4515	1240.68	1170.48	0.815096	0.943415
NMNAT3	64.6474	50.4515	405.766	418.187	0.780411	1.03061
ADAT2	66.0229	50.4515	228.329	234.319	0.764152	1.02624
CCP110	66.0229	50.4515	284.724	312.8	0.764152	1.09861
CDCA2	67.3983	50.4515	247.586	218.623	0.748557	0.883021
BMERB1	67.3983	50.4515	2781.21	2723.26	0.748557	0.979163
TIGD4	68.7738	50.4515	46.7662	34.7555	0.733586	0.743176
PPM1H	68.7738	50.4515	964.209	819.557	0.733586	0.849979
KCNAB2	68.7738	50.4515	914.692	927.187	0.733586	1.01366
HMG20A	70.1493	50.4515	896.811	844.222	0.719202	0.941361
FAIM	71.5248	50.4515	295.727	256.742	0.705371	0.868172
SLC25A38	71.5248	50.4515	438.777	433.883	0.705371	0.988847
CD274	72.9003	50.4515	141.674	98.6608	0.692063	0.696393
BRIP1	72.9003	50.4515	1019.23	1024.73	0.692063	1.00539
ZNF205	74.2757	50.4515	188.44	181.626	0.679247	0.963836
KLHL10	75.6512	50.4515	30.2605	22.4229	0.666897	0.740996
COX20	75.6512	50.4515	612.087	586.359	0.666897	0.957967
LRRC42	75.6512	50.4515	563.945	617.751	0.666897	1.09541
RNF170	77.0267	50.4515	632.719	660.355	0.654988	1.04368
PTPN4	78.4022	50.4515	2023.33	1785.98	0.643497	0.882697
PIGBOS1	79.7776	50.4515	83.9041	73.9956	0.632402	0.881907
CHCHD4	79.7776	50.4515	602.459	580.753	0.632402	0.963972
CPQ	79.7776	50.4515	2466.23	2403.74	0.632402	0.97466
LPAR1	79.7776	50.4515	5350.6	5236.87	0.632402	0.978744
BNC2	81.1531	50.4515	6596.79	6347.92	0.621683	0.962275
MRPL11	82.5286	50.4515	125.168	116.599	0.611322	0.931538
C3orf33	83.9041	50.4515	210.448	174.899	0.6013	0.831078
C1orf54	85.2795	50.4515	122.417	96.4185	0.591602	0.787621
ZNF345	85.2795	50.4515	673.983	567.3	0.591602	0.841711
RRAGB	86.655	50.4515	486.919	485.456	0.582211	0.996996
ADAMTS6	88.0305	50.4515	3343.78	3404.92	0.573114	1.01828
ARSJ	90.7814	50.4515	944.952	846.465	0.555747	0.895775
COG6	90.7814	50.4515	922.945	856.555	0.555747	0.928067
SMO	90.7814	50.4515	123.793	140.143	0.555747	1.13208
C16orf87	93.5324	50.4515	398.888	380.068	0.539402	0.952819
NKAP	96.2834	50.4515	331.49	281.407	0.52399	0.848917
MBIP	96.2834	50.4515	397.513	365.493	0.52399	0.919451
ABCA5	97.6588	50.4515	444.279	435.004	0.51661	0.979125
ZNF667	101.785	50.4515	708.37	602.055	0.495666	0.849916
AC005261.1	101.785	50.4515	225.578	230.956	0.495666	1.02384
CLCN6	118.291	50.4515	2477.23	2268.08	0.426504	0.915569
AKR7A2	46.7662	51.5727	341.118	343.07	1.10278	1.00572
STBD1	48.1417	51.5727	67.3983	73.9956	1.07127	1.09788
SECTM1	52.2681	51.5727	279.222	285.892	0.986695	1.02389
EFNB3	53.6436	51.5727	20.6321	23.5441	0.961395	1.14113
HJV	55.0191	51.5727	82.5286	84.0859	0.93736	1.01887
ARMCX5	56.3945	51.5727	75.6512	51.5727	0.914498	0.681717
CENPK	56.3945	51.5727	525.432	492.183	0.914498	0.93672
DMXL2	57.77	51.5727	966.96	896.916	0.892724	0.927563
RAD54L	57.77	51.5727	378.256	387.916	0.892724	1.02554
PEX3	59.1455	51.5727	416.769	345.313	0.871963	0.828546
FNTB	59.1455	51.5727	856.922	802.74	0.871963	0.936772
MYORG	61.8964	51.5727	71.5248	58.2996	0.833209	0.815096
DOCK4	63.2719	51.5727	784.022	742.198	0.815096	0.946655
KRBOX4	66.0229	51.5727	751.01	665.96	0.781134	0.886753
ME1	66.0229	51.5727	2204.89	2154.84	0.781134	0.977302
CLTRN	67.3983	51.5727	510.302	353.161	0.765192	0.692063
AC097625.2	67.3983	51.5727	519.93	361.009	0.765192	0.694341
ARG2	67.3983	51.5727	266.842	211.896	0.765192	0.794088
ZBTB8A	67.3983	51.5727	843.167	816.194	0.765192	0.96801
CHRNA5	67.3983	51.5727	50.8926	59.4207	0.765192	1.16757
CCDC142	70.1493	51.5727	1913.29	1784.86	0.735185	0.932878
ARMH1	71.5248	51.5727	228.329	233.198	0.721046	1.02133
AXDND1	71.5248	51.5727	143.05	147.991	0.721046	1.03454
DAGLA	71.5248	51.5727	541.938	578.511	0.721046	1.06749
DBP	72.9003	51.5727	284.724	252.258	0.707442	0.885974
GAB1	74.2757	51.5727	1268.19	1200.75	0.694341	0.94682
CCDC115	74.2757	51.5727	138.923	132.295	0.694341	0.95229
CYP1B1	74.2757	51.5727	262.716	252.258	0.694341	0.960192
MAGI2	75.6512	51.5727	11761.7	10708.1	0.681717	0.910418
TAC1	77.0267	51.5727	143.05	134.537	0.669543	0.940495
KATNAL1	77.0267	51.5727	1418.12	1334.16	0.669543	0.940799
AKAP7	79.7776	51.5727	1090.75	1105.45	0.646455	1.01347
FBXL8	81.1531	51.5727	155.429	116.599	0.635499	0.750177
AC025165.3	82.5286	51.5727	845.918	767.985	0.624907	0.907871
IRAK3	83.9041	51.5727	583.202	639.053	0.614663	1.09577
TMEM63A	85.2795	51.5727	740.006	788.165	0.604749	1.06508
BNIP1	86.655	51.5727	237.957	193.958	0.595149	0.815096
LRRC23	88.0305	51.5727	511.677	395.764	0.58585	0.773465
C16orf71	88.0305	51.5727	68.7738	67.2687	0.58585	0.978115
PIGO	89.406	51.5727	262.716	216.381	0.576837	0.823631
DYRK1A	90.7814	51.5727	7001.18	6381.56	0.568097	0.911498
C14orf93	94.9079	51.5727	546.064	458.548	0.543397	0.839734
EVI5L	97.6588	51.5727	514.428	478.729	0.52809	0.930604
CENPN	97.6588	51.5727	303.98	291.498	0.52809	0.958936
MBNL2	100.41	51.5727	2849.99	2805.11	0.513622	0.984252
THBD	44.0152	52.6938	57.77	63.9053	1.19717	1.1062
PTPRU	46.7662	52.6938	1097.63	1048.27	1.12675	0.955031
ALG12	50.8926	52.6938	357.624	301.588	1.03539	0.843311
HJURP	50.8926	52.6938	360.375	364.372	1.03539	1.01109
SIX2	50.8926	52.6938	16.5057	19.0595	1.03539	1.15472
ODF3B	53.6436	52.6938	700.118	542.634	0.982295	0.775062
KIFC1	57.77	52.6938	244.835	220.866	0.912131	0.902101
CCDC113	59.1455	52.6938	210.448	186.11	0.890919	0.884352
KLHL5	61.8964	52.6938	1418.12	1231.02	0.851322	0.868065
LXN	61.8964	52.6938	68.7738	89.6916	0.851322	1.30415
FTO	63.2719	52.6938	4702.75	4465.52	0.832815	0.949555
PLCD1	63.2719	52.6938	358.999	344.192	0.832815	0.958753
CEP131	66.0229	52.6938	210.448	233.198	0.798115	1.1081
GDF11	67.3983	52.6938	204.946	139.022	0.781827	0.678335
RPIA	67.3983	52.6938	729.003	656.991	0.781827	0.901219
PPHLN1	68.7738	52.6938	2649.17	2442.98	0.76619	0.922167
DOCK10	68.7738	52.6938	1645.07	1579.69	0.76619	0.960259
PRKD1	68.7738	52.6938	2683.55	2588.72	0.76619	0.964662
SNX33	70.1493	52.6938	658.853	611.024	0.751167	0.927406
ISG20L2	70.1493	52.6938	265.467	252.258	0.751167	0.950241
EIPR1	70.1493	52.6938	2041.21	2048.33	0.751167	1.00349
ZNF585B	71.5248	52.6938	730.378	563.936	0.736721	0.772115
FIZ1	71.5248	52.6938	232.456	229.835	0.736721	0.988726
CREB3L4	72.9003	52.6938	275.095	230.956	0.722821	0.839549
SLC35G2	72.9003	52.6938	401.639	382.311	0.722821	0.951876
VAX2	74.2757	52.6938	364.501	375.584	0.709435	1.0304
AP1S2	75.6512	52.6938	240.708	188.352	0.696537	0.782492
ZNF726	75.6512	52.6938	657.478	589.722	0.696537	0.896947
CD99L2	77.0267	52.6938	976.588	882.341	0.684098	0.903494
FMO5	77.0267	52.6938	184.314	167.051	0.684098	0.906338
ZC3H12B	77.0267	52.6938	133.421	141.264	0.684098	1.05878
FOSL2	78.4022	52.6938	2735.82	2494.55	0.672097	0.911809
MBTPS2	78.4022	52.6938	511.677	482.092	0.672097	0.942181
MED11	78.4022	52.6938	55.0191	56.0573	0.672097	1.01887
PRRX1	79.7776	52.6938	3356.16	2944.13	0.660509	0.87723
CSNK2B	81.1531	52.6938	500.673	424.914	0.649314	0.848685
TAB2	81.1531	52.6938	2708.31	2446.34	0.649314	0.90327
SOCS7	81.1531	52.6938	1114.14	1024.73	0.649314	0.91975
GPALPP1	82.5286	52.6938	895.435	750.046	0.638492	0.837633
MAP3K20	82.5286	52.6938	3840.33	3534.97	0.638492	0.920486
ANKS1A	82.5286	52.6938	2019.2	1885.77	0.638492	0.933918
SCAP	82.5286	52.6938	1276.44	1207.47	0.638492	0.945968
MAMLD1	82.5286	52.6938	1404.36	1490	0.638492	1.06098
TARBP2	83.9041	52.6938	258.59	210.775	0.628025	0.815096
TCEAL3	85.2795	52.6938	242.084	213.018	0.617895	0.879933
DNAL4	86.655	52.6938	360.375	331.859	0.608087	0.920872
ADGRB2	86.655	52.6938	236.582	224.229	0.608087	0.947786
MAML3	88.0305	52.6938	2206.26	2176.14	0.598586	0.986347
SLC7A7	90.7814	52.6938	332.865	266.833	0.580447	0.801623
COMMD9	90.7814	52.6938	324.612	283.65	0.580447	0.87381
ZNF549	90.7814	52.6938	695.991	655.87	0.580447	0.942354
ZNF132	92.1569	52.6938	222.827	237.683	0.571784	1.06667
GAR1	97.6588	52.6938	242.084	209.654	0.539571	0.866039
HMGB3	103.161	52.6938	364.501	325.132	0.510793	0.891992
TMEM246	105.912	52.6938	425.022	335.222	0.497526	0.788717
ZNF391	114.165	52.6938	110.038	110.993	0.46156	1.00868
FAM171B	45.3907	53.815	276.471	232.077	1.18559	0.839427
BACE2	46.7662	53.815	1323.21	1132.36	1.15072	0.855766
CRPPA	55.0191	53.815	903.688	871.13	0.978115	0.963972
IDI1	56.3945	53.815	702.868	646.901	0.954259	0.920373
ACOT7	56.3945	53.815	2147.12	2105.51	0.954259	0.980621
GALNT18	56.3945	53.815	799.152	797.134	0.954259	0.997475
ARHGEF39	56.3945	53.815	93.5324	109.872	0.954259	1.1747
COL5A2	57.77	53.815	1803.25	1757.96	0.931538	0.974882
PAWR	60.521	53.815	1750.98	1620.05	0.889196	0.925227
SCARB1	60.521	53.815	511.677	522.454	0.889196	1.02106
POC1A	60.521	53.815	896.811	1024.73	0.889196	1.14263
TDRKH	63.2719	53.815	187.065	147.991	0.850535	0.791123
RITA1	66.0229	53.815	236.582	270.196	0.815096	1.14208
XAB2	68.7738	53.815	297.103	295.982	0.782492	0.996228
LAMA2	72.9003	53.815	760.639	736.592	0.7382	0.968387
HTATSF1	74.2757	53.815	167.808	160.324	0.72453	0.955399
ZNF101	74.2757	53.815	290.226	282.529	0.72453	0.973479
RBBP9	75.6512	53.815	108.663	75.1167	0.711356	0.691284
RTEL1	75.6512	53.815	1975.18	1912.67	0.711356	0.968352
RTEL1-TNFRSF6B	75.6512	53.815	2082.47	2058.42	0.711356	0.988452
DHX40	77.0267	53.815	480.041	435.004	0.698654	0.906181
PARP14	78.4022	53.815	2883	2947.49	0.686397	1.02237
THOC2	81.1531	53.815	1895.41	1714.23	0.663129	0.904413
SLC43A3	81.1531	53.815	407.141	387.916	0.663129	0.952781
CKS1B	82.5286	53.815	610.712	522.454	0.652077	0.855484
SPHK2	83.9041	53.815	840.416	797.134	0.641387	0.9485
BARD1	83.9041	53.815	1149.9	1092	0.641387	0.949645
PCDHGC3	83.9041	53.815	962.834	1015.76	0.641387	1.05497
BRF2	85.2795	53.815	463.536	467.518	0.631042	1.00859
MRE11	86.655	53.815	894.06	811.709	0.621025	0.907891
EXOG	89.406	53.815	856.922	765.742	0.601917	0.893596
ZNF136	89.406	53.815	530.934	486.577	0.601917	0.916455
MTSS1	90.7814	53.815	826.661	909.249	0.592797	1.0999
ATPAF2	93.5324	53.815	643.723	603.176	0.575362	0.937012
PATZ1	94.9079	53.815	563.945	531.423	0.567023	0.94233
NGDN	96.2834	53.815	822.535	781.438	0.558923	0.950037
UTP15	99.0343	53.815	303.98	300.467	0.543397	0.988442
NEURL4	99.0343	53.815	496.547	521.333	0.543397	1.04992
ABCA3	100.41	53.815	403.015	346.434	0.535953	0.859606
ACCS	100.41	53.815	310.858	302.709	0.535953	0.973787
COMMD10	100.41	53.815	2339.69	2319.65	0.535953	0.991436
PLSCR3	46.7662	54.9361	81.1531	61.663	1.1747	0.759835
TMEM192	52.2681	54.9361	994.47	830.769	1.05104	0.835389
AURKB	53.6436	54.9361	123.793	93.0551	1.02409	0.7517
MAP3K21	55.0191	54.9361	155.429	143.507	0.998493	0.923295
DENND2D	56.3945	54.9361	434.651	381.189	0.974139	0.877002
XIAP	56.3945	54.9361	1480.01	1324.07	0.974139	0.894636
VIRMA	56.3945	54.9361	1298.45	1179.44	0.974139	0.908348
KLHL30	56.3945	54.9361	866.55	844.222	0.974139	0.974234
DRAM1	59.1455	54.9361	3460.7	3160.51	0.92883	0.913257
CUEDC1	59.1455	54.9361	2202.14	2157.08	0.92883	0.979541
FANCM	60.521	54.9361	458.034	394.643	0.90772	0.861603
GTDC1	60.521	54.9361	1772.99	1696.29	0.90772	0.956742
FAM102B	60.521	54.9361	264.091	255.621	0.90772	0.967926
TRIAP1	61.8964	54.9361	64.6474	59.4207	0.887549	0.919151
SLC22A23	61.8964	54.9361	1482.76	1475.43	0.887549	0.995052
EFEMP1	64.6474	54.9361	646.474	716.412	0.849781	1.10818
ZNF566	67.3983	54.9361	968.335	760.137	0.815096	0.784993
VASH1	68.7738	54.9361	338.367	316.163	0.798794	0.934378
GSPT2	68.7738	54.9361	33.0114	38.1189	0.798794	1.15472
ARAF	71.5248	54.9361	254.463	217.502	0.768071	0.854749
DLC1	71.5248	54.9361	4682.12	4185.24	0.768071	0.893876
C1GALT1C1	71.5248	54.9361	56.3945	61.663	0.768071	1.09342
PPP1R16A	72.9003	54.9361	426.398	409.218	0.753579	0.95971
EPC1	74.2757	54.9361	4314.87	3755.84	0.739624	0.87044
SGTB	77.0267	54.9361	555.693	516.848	0.713209	0.930097
OSGEPL1	77.0267	54.9361	147.176	143.507	0.713209	0.975068
TRIM16L	78.4022	54.9361	310.858	289.255	0.700697	0.930508
ACTR6	78.4022	54.9361	456.658	500.031	0.700697	1.09498
FMNL3	79.7776	54.9361	1380.98	1270.26	0.688616	0.919824
ATRX	79.7776	54.9361	3385.05	3210.96	0.688616	0.948572
LRIG3	79.7776	54.9361	1162.28	1135.72	0.688616	0.977151
SSTR1	81.1531	54.9361	199.444	124.447	0.676944	0.62397
KIF13B	81.1531	54.9361	914.692	810.588	0.676944	0.886187
FGF5	82.5286	54.9361	938.075	707.443	0.665662	0.754143
NUS1	82.5286	54.9361	702.868	636.811	0.665662	0.906017
ZNF17	83.9041	54.9361	266.842	201.806	0.654749	0.756275
ATP6AP2	83.9041	54.9361	386.509	299.346	0.654749	0.774486
ZNF268	83.9041	54.9361	1034.36	1004.55	0.654749	0.971178
ZNF383	85.2795	54.9361	656.102	538.15	0.644189	0.820222
LINS1	85.2795	54.9361	610.712	549.361	0.644189	0.899543
EML3	88.0305	54.9361	284.724	227.592	0.624058	0.799345
RGS9BP	88.0305	54.9361	71.5248	67.2687	0.624058	0.940495
SMG6	90.7814	54.9361	4506.06	4278.29	0.605147	0.949452
NIPBL	92.1569	54.9361	3632.63	3365.68	0.596115	0.926512
ZIK1	94.9079	54.9361	264.091	250.015	0.578836	0.9467
COX7B	97.6588	54.9361	312.233	234.319	0.562531	0.750463
SLC22A18	99.0343	54.9361	510.302	455.185	0.554718	0.891992
UBE2D3	100.41	54.9361	4321.75	3494.61	0.547119	0.80861
LCLAT1	101.785	54.9361	1900.91	1830.83	0.539726	0.963134
ZNF33A	103.161	54.9361	1273.69	1192.9	0.532529	0.936568
DDR2	110.038	54.9361	5885.66	5671.87	0.499246	0.963676
THSD4	115.54	54.9361	5229.56	5749.23	0.475473	1.09937
MED24	123.793	54.9361	910.565	907.007	0.443774	0.996092
RPTOR	129.295	54.9361	8947.47	8706.81	0.42489	0.973103
PPIH	42.6398	56.0573	320.486	272.438	1.31467	0.850079
PLEKHH1	55.0191	56.0573	250.337	243.289	1.01887	0.971845
ETV6	56.3945	56.0573	3097.57	2935.16	0.994019	0.947567
NEFH	56.3945	56.0573	88.0305	88.5705	0.994019	1.00613
PPP1R14C	59.1455	56.0573	320.486	251.137	0.947786	0.783612
DOCK6	61.8964	56.0573	817.033	727.623	0.905662	0.890568
ZNF684	61.8964	56.0573	114.165	119.963	0.905662	1.05079
ADGRL2	63.2719	56.0573	1081.12	989.971	0.885974	0.915687
ZNF30	64.6474	56.0573	193.942	122.205	0.867123	0.63011
GNL1	64.6474	56.0573	821.159	761.258	0.867123	0.927052
CD109	66.0229	56.0573	1486.89	1445.16	0.849058	0.971932
RNF2	67.3983	56.0573	667.106	547.119	0.831731	0.820138
TOP2A	67.3983	56.0573	401.639	475.366	0.831731	1.18356
LRRN4CL	68.7738	56.0573	281.973	239.925	0.815096	0.850881
ABAT	68.7738	56.0573	469.037	403.612	0.815096	0.860512
CIR1	68.7738	56.0573	815.658	778.075	0.815096	0.953923
JADE2	68.7738	56.0573	1861.02	1843.16	0.815096	0.990405
PAQR5	70.1493	56.0573	563.945	624.478	0.799114	1.10734
LSM11	71.5248	56.0573	195.318	161.445	0.783746	0.826576
RCN3	71.5248	56.0573	295.727	245.531	0.783746	0.830261
COL7A1	72.9003	56.0573	327.363	306.073	0.768958	0.934963
GOLGA8B	72.9003	56.0573	686.363	697.352	0.768958	1.01601
SLC9A6	74.2757	56.0573	431.9	365.493	0.754718	0.846246
KMT2D	74.2757	56.0573	2456.6	2236.68	0.754718	0.910479
HNRNPH2	74.2757	56.0573	213.199	197.322	0.754718	0.925528
WDR90	74.2757	56.0573	309.482	295.982	0.754718	0.956379
ARHGEF3	74.2757	56.0573	1607.93	1634.63	0.754718	1.0166
TRAPPC6A	74.2757	56.0573	270.969	280.286	0.754718	1.03439
ERCC8	75.6512	56.0573	855.546	686.141	0.740996	0.801991
SNAPC2	75.6512	56.0573	111.414	122.205	0.740996	1.09686
SLC25A37	77.0267	56.0573	1030.23	896.916	0.727764	0.870596
DNASE1L1	78.4022	56.0573	404.39	311.678	0.714996	0.770737
ZNF75D	78.4022	56.0573	599.708	535.907	0.714996	0.893614
RUNX1T1	78.4022	56.0573	3023.3	2817.44	0.714996	0.931909
RNF215	78.4022	56.0573	784.022	834.132	0.714996	1.06391
TPX2	79.7776	56.0573	1020.6	868.888	0.702669	0.851347
AHCYL2	79.7776	56.0573	1594.18	1450.76	0.702669	0.910038
NTPCR	79.7776	56.0573	526.808	522.454	0.702669	0.991736
CLBA1	81.1531	56.0573	383.758	357.645	0.690759	0.931956
CLCF1	82.5286	56.0573	629.968	521.333	0.679247	0.827554
AP003419.1	82.5286	56.0573	1668.45	1465.34	0.679247	0.878261
BCL9	82.5286	56.0573	341.118	340.828	0.679247	0.99915
TCEAL8	82.5286	56.0573	110.038	124.447	0.679247	1.13095
SUMO2	83.9041	56.0573	1057.74	920.46	0.668111	0.870213
MBD5	83.9041	56.0573	4054.9	3747.99	0.668111	0.92431
CYP2E1	86.655	56.0573	114.165	93.0551	0.646902	0.815096
PFDN6	86.655	56.0573	488.294	410.339	0.646902	0.840352
COA1	89.406	56.0573	2232.4	1921.64	0.626997	0.860798
SP4	92.1569	56.0573	1166.4	968.67	0.608281	0.830475
ZKSCAN7	92.1569	56.0573	698.742	635.689	0.608281	0.909763
RPS29	93.5324	56.0573	2486.86	2125.69	0.599335	0.854769
TNC	93.5324	56.0573	1063.24	972.033	0.599335	0.914215
CTIF	93.5324	56.0573	7983.27	7567.73	0.599335	0.947949
ZNF226	94.9079	56.0573	570.823	503.394	0.590649	0.881875
CERCAM	94.9079	56.0573	237.957	210.775	0.590649	0.885769
CTNND1	94.9079	56.0573	1492.39	1401.43	0.590649	0.939051
SETD1A	94.9079	56.0573	837.665	861.04	0.590649	1.0279
MASTL	100.41	56.0573	657.478	604.297	0.558285	0.919114
MRPL47	101.785	56.0573	420.896	353.161	0.55074	0.839069
RTF2	104.536	56.0573	972.462	904.764	0.536247	0.930385
PNKD	107.287	56.0573	752.386	655.87	0.522497	0.871721
C12orf43	107.287	56.0573	422.271	389.037	0.522497	0.921297
TMEM94	108.663	56.0573	577.7	500.031	0.515884	0.865554
CCDC86	111.414	56.0573	207.697	195.079	0.503146	0.93925
AP5S1	116.916	56.0573	530.934	468.639	0.479468	0.882669
BIK	37.1379	57.1784	110.038	99.7819	1.53963	0.906794
MYH10	46.7662	57.1784	1966.93	1849.89	1.22264	0.940495
IGFBP6	50.8926	57.1784	286.099	226.471	1.12351	0.791584
MAP3K6	56.3945	57.1784	226.954	180.504	1.0139	0.795336
B4GALT6	56.3945	57.1784	455.283	455.185	1.0139	0.999785
SLC39A8	60.521	57.1784	902.313	767.985	0.94477	0.851129
TMCC2	63.2719	57.1784	188.44	153.597	0.903693	0.815096
ABCB10	63.2719	57.1784	695.991	655.87	0.903693	0.942354
DENND5B	66.0229	57.1784	2148.49	1903.7	0.866039	0.886065
DOP1A	66.0229	57.1784	884.431	821.8	0.866039	0.929184
PRR3	66.0229	57.1784	233.831	227.592	0.866039	0.97332
RNF144A	68.7738	57.1784	935.324	1039.3	0.831398	1.11117
STAC	70.1493	57.1784	1060.49	1030.33	0.815096	0.971561
MBOAT7	71.5248	57.1784	704.244	615.509	0.799421	0.873999
TMEM117	71.5248	57.1784	2693.18	2385.8	0.799421	0.885865
AKT1	71.5248	57.1784	1320.46	1335.28	0.799421	1.01123
ZNF618	72.9003	57.1784	2192.51	2124.57	0.784338	0.969013
DDX59	74.2757	57.1784	584.578	558.33	0.769813	0.955101
ARHGEF7	74.2757	57.1784	4990.23	4838.86	0.769813	0.969668
RMI1	75.6512	57.1784	1021.98	812.83	0.755816	0.795349
TMED1	75.6512	57.1784	126.544	109.872	0.755816	0.868254
TRIM21	77.0267	57.1784	353.497	311.678	0.74232	0.881699
TCP11L2	77.0267	57.1784	654.727	685.02	0.74232	1.04627
TGFB2	78.4022	57.1784	689.114	707.443	0.729296	1.0266
TAZ	81.1531	57.1784	317.735	307.194	0.704574	0.966824
RPS6KA3	82.5286	57.1784	1429.12	1243.35	0.692832	0.870011
FAM193B	82.5286	57.1784	1382.35	1311.74	0.692832	0.948918
C1R	83.9041	57.1784	475.915	448.458	0.681474	0.942307
UPP2	83.9041	57.1784	434.651	424.914	0.681474	0.977599
CCND3	83.9041	57.1784	191.191	206.291	0.681474	1.07898
ZFP69B	85.2795	57.1784	171.935	191.716	0.670482	1.11505
VPS45	86.655	57.1784	1043.99	967.548	0.65984	0.926782
ANKRD36	86.655	57.1784	2409.83	2319.65	0.65984	0.962576
TRMT44	86.655	57.1784	1497.89	1530.36	0.65984	1.02168
TNFAIP6	88.0305	57.1784	138.923	109.872	0.64953	0.790885
NCAPH2	88.0305	57.1784	345.245	299.346	0.64953	0.867054
INSYN1	88.0305	57.1784	317.735	294.861	0.64953	0.92801
CCDC15	89.406	57.1784	387.884	367.736	0.639537	0.948055
SSBP4	90.7814	57.1784	749.635	732.108	0.629847	0.97662
SYNGR1	90.7814	57.1784	467.662	467.518	0.629847	0.999691
RREB1	92.1569	57.1784	2748.2	2607.78	0.620446	0.948905
SNRPB2	92.1569	57.1784	338.367	329.617	0.620446	0.974139
RLIM	93.5324	57.1784	993.094	890.189	0.611322	0.89638
POLR1A	94.9079	57.1784	2704.19	2512.49	0.602462	0.92911
ANKRD24	97.6588	57.1784	420.896	329.617	0.585491	0.783131
BIVM	110.038	57.1784	738.631	650.264	0.519624	0.880364
POLK	110.038	57.1784	1321.83	1169.35	0.519624	0.884646
BIVM-ERCC5	110.038	57.1784	2096.23	1891.37	0.519624	0.902275
PWWP2B	110.038	57.1784	497.922	534.786	0.519624	1.07404
TMEM43	111.414	57.1784	1405.74	1301.65	0.513209	0.925955
ZNF335	111.414	57.1784	940.826	975.396	0.513209	1.03674
ZNF296	50.8926	58.2996	37.1379	54.9361	1.14554	1.47925
NEMP2	56.3945	58.2996	272.344	239.925	1.03378	0.880962
TTC37	63.2719	58.2996	1404.36	1310.62	0.921413	0.933249
ABCC4	64.6474	58.2996	2174.63	2130.18	0.901808	0.979559
PBX2	66.0229	58.2996	423.647	356.524	0.883021	0.84156
NPTX1	66.0229	58.2996	61.8964	54.9361	0.883021	0.887549
RTTN	66.0229	58.2996	1554.29	1442.91	0.883021	0.928344
DSCC1	66.0229	58.2996	143.05	139.022	0.883021	0.971845
WDR18	66.0229	58.2996	729.003	733.229	0.883021	1.0058
MARCH6	67.3983	58.2996	2957.27	2660.48	0.865	0.899638
ZNF100	67.3983	58.2996	528.183	491.062	0.865	0.929719
CASTOR1	67.3983	58.2996	93.5324	87.4493	0.865	0.934963
LRTOMT	68.7738	58.2996	448.405	364.372	0.8477	0.812596
AP000812.5	68.7738	58.2996	448.405	364.372	0.8477	0.812596
TCP11L1	68.7738	58.2996	1048.11	905.885	0.8477	0.864301
USP13	68.7738	58.2996	942.201	935.035	0.8477	0.992394
BBIP1	70.1493	58.2996	441.528	371.099	0.831078	0.840488
ENC1	70.1493	58.2996	312.233	274.681	0.831078	0.879729
C3orf52	70.1493	58.2996	543.313	560.573	0.831078	1.03177
COL8A1	70.1493	58.2996	1420.87	1510.18	0.831078	1.06286
ZNF212	70.1493	58.2996	290.226	328.496	0.831078	1.13186
ZDHHC2	71.5248	58.2996	983.466	892.432	0.815096	0.907435
ZNF229	72.9003	58.2996	744.133	649.143	0.799717	0.872349
POGZ	72.9003	58.2996	1684.96	1530.36	0.799717	0.90825
DMC1	74.2757	58.2996	159.555	130.053	0.784907	0.815096
ZSCAN22	75.6512	58.2996	445.654	378.947	0.770636	0.850316
F8A2	77.0267	58.2996	42.6398	38.1189	0.756875	0.893976
HOXD9	78.4022	58.2996	103.161	77.359	0.743596	0.749888
PTBP2	78.4022	58.2996	3330.03	3056.24	0.743596	0.917783
AP4B1	78.4022	58.2996	158.18	167.051	0.743596	1.05608
COL18A1	78.4022	58.2996	832.163	954.095	0.743596	1.14652
TASP1	79.7776	58.2996	1347.97	1312.86	0.730776	0.973956
PCDH1	81.1531	58.2996	358.999	293.74	0.71839	0.818219
GALK2	81.1531	58.2996	2550.13	2368.98	0.71839	0.928963
ANKRD42	82.5286	58.2996	357.624	301.588	0.706416	0.843311
HDGF	82.5286	58.2996	1779.87	1540.45	0.706416	0.865488
ZNF236	83.9041	58.2996	2206.26	1879.04	0.694836	0.851684
ZNF225	83.9041	58.2996	429.149	371.099	0.694836	0.864733
DRAM2	85.2795	58.2996	532.309	473.123	0.683629	0.888813
CSPP1	85.2795	58.2996	2082.47	1863.34	0.683629	0.894775
MKI67	85.2795	58.2996	581.827	576.269	0.683629	0.990448
BLMH	88.0305	58.2996	661.604	577.39	0.662265	0.872712
LRP12	88.0305	58.2996	991.719	941.762	0.662265	0.949626
GBP1	88.0305	58.2996	272.344	283.65	0.662265	1.04151
ZNF384	90.7814	58.2996	753.761	670.445	0.642197	0.889466
LRRC1	90.7814	58.2996	601.083	581.874	0.642197	0.968043
RFX8	92.1569	58.2996	2430.47	2231.08	0.632612	0.917963
ZMYM1	92.1569	58.2996	734.504	698.474	0.632612	0.950945
CHAF1B	93.5324	58.2996	621.715	609.903	0.623309	0.981
HELLS	94.9079	58.2996	735.88	674.929	0.614275	0.917173
BRD2	94.9079	58.2996	4405.65	4142.63	0.614275	0.9403
PSG4	94.9079	58.2996	1217.3	1223.17	0.614275	1.00482
SLC35B4	96.2834	58.2996	566.696	447.337	0.6055	0.789377
MLST8	96.2834	58.2996	269.593	267.954	0.6055	0.993918
WNT11	99.0343	58.2996	185.689	170.414	0.58868	0.917738
KDM4D	99.0343	58.2996	112.789	119.963	0.58868	1.0636
ZNF573	100.41	58.2996	590.079	460.791	0.580616	0.780896
GNG11	100.41	58.2996	225.578	178.262	0.580616	0.790245
BMPR2	100.41	58.2996	2827.98	2724.38	0.580616	0.963367
ASH1L	101.785	58.2996	4935.21	4327.62	0.57277	0.876887
NUMA1	103.161	58.2996	2620.28	2446.34	0.565133	0.933616
ARHGAP32	104.536	58.2996	2442.85	2183.99	0.557697	0.894035
MET	107.287	58.2996	2209.02	2098.78	0.543397	0.950099
EIF2A	112.789	58.2996	954.581	827.405	0.51689	0.866773
SUCLG1	112.789	58.2996	764.765	677.172	0.51689	0.885464
ZNF354C	114.165	58.2996	398.888	382.311	0.510663	0.95844
ANTXR1	114.165	58.2996	3204.86	3290.56	0.510663	1.02674
IPO11	115.54	58.2996	2444.22	2261.35	0.504583	0.925182
PSMB4	118.291	58.2996	229.705	184.989	0.492849	0.805334
KAT5	140.299	58.2996	606.585	587.48	0.415539	0.968504
TK1	48.1417	59.4207	291.601	272.438	1.23429	0.934284
NUBP1	53.6436	59.4207	488.294	456.306	1.10769	0.93449
KIF26B	53.6436	59.4207	2684.93	3049.52	1.10769	1.13579
NFE2L3	55.0191	59.4207	173.31	188.352	1.08	1.08679
SMPDL3A	56.3945	59.4207	353.497	265.711	1.05366	0.751664
CENPH	56.3945	59.4207	232.456	224.229	1.05366	0.964611
ELF4	56.3945	59.4207	781.271	833.011	1.05366	1.06623
ARMC4	61.8964	59.4207	741.382	739.956	0.960002	0.998077
MAST4	63.2719	59.4207	2196.64	2022.55	0.939132	0.920747
MAGI1	64.6474	59.4207	4737.14	4754.78	0.919151	1.00372
SH3KBP1	66.0229	59.4207	3492.33	3218.81	0.900002	0.921678
GAL3ST4	67.3983	59.4207	147.176	161.445	0.881634	1.09695
MYBL1	70.1493	59.4207	478.666	455.185	0.84706	0.950945
SEMA4D	70.1493	59.4207	1246.18	1283.71	0.84706	1.03012
RHEBL1	70.1493	59.4207	81.1531	89.6916	0.84706	1.10521
DDIT4L	70.1493	59.4207	37.1379	44.8458	0.84706	1.20755
NMRK1	71.5248	59.4207	292.976	297.104	0.830771	1.01409
POC1B-GALNT4	74.2757	59.4207	306.731	227.592	0.800002	0.741993
TRIM5	74.2757	59.4207	607.961	507.879	0.800002	0.835381
CPEB3	74.2757	59.4207	1458.01	1359.95	0.800002	0.932747
AC253536.7	74.2757	59.4207	392.011	374.463	0.800002	0.955235
POC1B	74.2757	59.4207	1148.52	1116.66	0.800002	0.972258
SOD3	75.6512	59.4207	37.1379	25.7863	0.785456	0.694341
FBXL14	75.6512	59.4207	426.398	386.795	0.785456	0.907123
CRABP2	75.6512	59.4207	155.429	141.264	0.785456	0.908868
GAREM1	75.6512	59.4207	944.952	878.978	0.785456	0.930182
ZFAND4	79.7776	59.4207	525.432	449.579	0.744829	0.855637
DGLUCY	79.7776	59.4207	1980.69	1908.19	0.744829	0.963398
PROSER1	83.9041	59.4207	917.443	766.863	0.708198	0.83587
TENT2	83.9041	59.4207	2152.62	2006.85	0.708198	0.932282
APBB1	85.2795	59.4207	438.777	366.615	0.696776	0.835537
ATF6B	85.2795	59.4207	411.267	354.282	0.696776	0.861439
FIBIN	85.2795	59.4207	63.2719	61.663	0.696776	0.974571
TMEM132A	85.2795	59.4207	270.969	269.075	0.696776	0.99301
ACADS	86.655	59.4207	203.571	193.958	0.685716	0.952781
VSTM4	86.655	59.4207	488.294	498.91	0.685716	1.02174
MED6	88.0305	59.4207	455.283	424.914	0.675001	0.933297
ENDOV	88.0305	59.4207	1092.13	1063.97	0.675001	0.974214
AC138894.1	89.406	59.4207	781.271	723.139	0.664617	0.925593
CLN3	89.406	59.4207	481.417	467.518	0.664617	0.971129
NAT1	89.406	59.4207	89.406	95.2974	0.664617	1.06589
WDR31	90.7814	59.4207	231.08	205.17	0.654547	0.887872
COPS4	94.9079	59.4207	510.302	415.945	0.626088	0.815096
TMEM129	96.2834	59.4207	547.44	491.062	0.617144	0.897015
KLK15	97.6588	59.4207	22.0076	19.0595	0.608452	0.866039
OPA1	97.6588	59.4207	2133.36	1974.34	0.608452	0.925457
CFAP70	101.785	59.4207	469.037	451.822	0.583785	0.963295
RFNG	103.161	59.4207	167.808	135.659	0.576001	0.808415
PUS7L	103.161	59.4207	484.168	402.491	0.576001	0.831305
RWDD2B	103.161	59.4207	270.969	261.227	0.576001	0.964047
EPB41	110.038	59.4207	2169.13	1895.86	0.540001	0.874019
MSRB3	112.789	59.4207	2742.7	2502.4	0.52683	0.912384
TRAF3IP1	116.916	59.4207	869.301	883.463	0.508236	1.01629
DARS2	130.67	59.4207	430.524	371.099	0.454738	0.86197
NDUFB7	136.172	59.4207	248.961	198.443	0.436364	0.797083
CSF3	53.6436	60.5418	207.697	170.414	1.12859	0.820494
CRTAP	60.521	60.5418	788.148	751.167	1.00035	0.953079
SLC9A7	63.2719	60.5418	541.938	526.938	0.956852	0.972323
C4orf47	66.0229	60.5418	72.9003	47.0881	0.916983	0.645925
ROR1	66.0229	60.5418	2064.59	1990.03	0.916983	0.963888
BCAM	67.3983	60.5418	44.0152	36.9978	0.898269	0.840568
HEATR4	68.7738	60.5418	353.497	302.709	0.880304	0.856326
SLC43A2	70.1493	60.5418	768.891	691.747	0.863043	0.899668
EFNA4	72.9003	60.5418	57.77	49.3304	0.830475	0.85391
PHIP	72.9003	60.5418	4067.28	3554.03	0.830475	0.873809
ARSG	72.9003	60.5418	982.09	861.04	0.830475	0.876742
AL691442.1	72.9003	60.5418	356.248	315.042	0.830475	0.884332
MEDAG	74.2757	60.5418	317.735	290.377	0.815096	0.913895
KLLN	74.2757	60.5418	291.601	270.196	0.815096	0.926595
ADGRL1	74.2757	60.5418	855.546	809.467	0.815096	0.94614
LRR1	75.6512	60.5418	458.034	417.066	0.800276	0.910558
UXT	75.6512	60.5418	217.325	201.806	0.800276	0.92859
CASP9	77.0267	60.5418	209.072	155.839	0.785985	0.745384
ZNF77	77.0267	60.5418	156.804	133.416	0.785985	0.850846
RP2	77.0267	60.5418	456.658	445.095	0.785985	0.974678
LRRCC1	78.4022	60.5418	191.191	147.991	0.772196	0.774048
TBX15	78.4022	60.5418	1243.43	1144.69	0.772196	0.92059
LMNTD2	78.4022	60.5418	74.2757	69.511	0.772196	0.935851
KDELR3	78.4022	60.5418	210.448	198.443	0.772196	0.942954
SLC25A40	79.7776	60.5418	557.068	485.456	0.758882	0.871448
ZNF583	82.5286	60.5418	496.547	469.76	0.733586	0.946053
ITK	83.9041	60.5418	143.05	100.903	0.72156	0.705371
PC	83.9041	60.5418	1367.22	1200.75	0.72156	0.878237
GGT7	85.2795	60.5418	279.222	239.925	0.709922	0.859264
ZNF93	85.2795	60.5418	665.731	617.751	0.709922	0.927929
UQCRC2	85.2795	60.5418	955.956	919.339	0.709922	0.961696
ZNF625-ZNF20	89.406	60.5418	698.742	570.663	0.677157	0.8167
TTF1	89.406	60.5418	635.47	562.815	0.677157	0.885667
PRRX2	89.406	60.5418	1960.05	1790.47	0.677157	0.913479
ZNF625	89.406	60.5418	200.82	201.806	0.677157	1.00491
ZNF484	92.1569	60.5418	441.528	371.099	0.656943	0.840488
PRKAA2	92.1569	60.5418	423.647	437.247	0.656943	1.0321
DKKL1	93.5324	60.5418	104.536	104.267	0.647282	0.99742
RAB4B	94.9079	60.5418	276.471	238.804	0.637901	0.863758
ACAD11	94.9079	60.5418	855.546	748.925	0.637901	0.875376
PPP1R3F	94.9079	60.5418	1059.12	963.064	0.637901	0.909308
RAB4B-EGLN2	94.9079	60.5418	1617.56	1495.61	0.637901	0.924607
FBLN5	97.6588	60.5418	682.236	631.205	0.619932	0.9252
NSL1	97.6588	60.5418	722.125	722.018	0.619932	0.999851
LSM3	99.0343	60.5418	401.639	364.372	0.611322	0.907213
RAD51B	99.0343	60.5418	3716.54	3634.75	0.611322	0.977994
ZBTB14	100.41	60.5418	231.08	176.02	0.602948	0.761727
NUP43	100.41	60.5418	533.685	519.09	0.602948	0.972653
LIMK2	105.912	60.5418	894.06	809.467	0.571626	0.905383
NUSAP1	116.916	60.5418	744.133	738.835	0.517826	0.99288
DUS2	118.291	60.5418	810.156	747.804	0.511804	0.923037
LRSAM1	151.302	60.5418	1477.26	1431.7	0.400138	0.96916
RFX5	45.3907	61.663	206.321	193.958	1.35849	0.940077
TRIM34	56.3945	61.663	154.053	154.718	1.09342	1.00431
EFHB	59.1455	61.663	184.314	146.87	1.04256	0.796848
IFI27L1	59.1455	61.663	237.957	192.837	1.04256	0.810384
PTK2B	59.1455	61.663	1050.86	997.819	1.04256	0.949523
PUS10	60.521	61.663	559.819	500.031	1.01887	0.893201
LYRM4	60.521	61.663	1738.6	1676.11	1.01887	0.964057
CYB5R1	61.8964	61.663	133.421	113.236	0.996228	0.848708
USP37	67.3983	61.663	1836.26	1658.17	0.914904	0.903016
HEBP1	67.3983	61.663	416.769	396.885	0.914904	0.95229
ARID1B	67.3983	61.663	9677.85	9355.96	0.914904	0.966739
RFC5	67.3983	61.663	299.854	308.315	0.914904	1.02822
IFT46	71.5248	61.663	336.992	266.833	0.862121	0.791807
AC025283.3	71.5248	61.663	2595.52	2210.9	0.862121	0.851812
CCDC171	72.9003	61.663	1086.63	890.189	0.845854	0.819223
MEX3B	72.9003	61.663	235.206	219.744	0.845854	0.934262
IFT43	72.9003	61.663	1310.83	1250.08	0.845854	0.953654
BSDC1	72.9003	61.663	1060.49	1026.97	0.845854	0.968389
KRTAP1-5	74.2757	61.663	159.555	123.326	0.83019	0.772936
AC078927.1	74.2757	61.663	1255.81	1165.99	0.83019	0.928477
TMBIM4	74.2757	61.663	640.972	611.024	0.83019	0.953277
NAGA	74.2757	61.663	207.697	227.592	0.83019	1.09579
SPOCK1	74.2757	61.663	2973.78	3267.02	0.83019	1.09861
ZNF738	75.6512	61.663	279.222	261.227	0.815096	0.935553
TNS2	75.6512	61.663	991.719	957.458	0.815096	0.965453
LZTS3	75.6512	61.663	133.421	142.385	0.815096	1.06719
ZUP1	77.0267	61.663	517.179	431.641	0.800541	0.834606
ECT2	77.0267	61.663	1015.1	965.306	0.800541	0.950945
UPF3B	78.4022	61.663	695.991	609.903	0.786496	0.876309
MMUT	78.4022	61.663	372.754	347.555	0.786496	0.932398
DZIP1L	78.4022	61.663	756.512	726.502	0.786496	0.960331
MMAB	78.4022	61.663	502.049	503.394	0.786496	1.00268
PLCXD2	79.7776	61.663	401.639	291.498	0.772936	0.72577
TMEM241	79.7776	61.663	1427.74	1247.83	0.772936	0.87399
PRELID2	81.1531	61.663	894.06	884.584	0.759835	0.989401
CDKL5	82.5286	61.663	729.003	674.929	0.747171	0.925826
NFYC	82.5286	61.663	1015.1	975.396	0.747171	0.960885
RFX1	82.5286	61.663	625.842	626.72	0.747171	1.0014
ZNF629	83.9041	61.663	1005.47	825.163	0.734923	0.820671
C5orf34	83.9041	61.663	378.256	315.042	0.734923	0.83288
GFM2	83.9041	61.663	819.784	702.958	0.734923	0.857492
ZNF20	86.655	61.663	456.658	396.885	0.711592	0.869108
SHPRH	86.655	61.663	1470.38	1362.19	0.711592	0.926419
TWNK	86.655	61.663	242.084	232.077	0.711592	0.958664
PCCB	86.655	61.663	422.271	422.672	0.711592	1.00095
NAIF1	88.0305	61.663	137.548	168.172	0.700473	1.22264
GNPDA2	89.406	61.663	733.129	611.024	0.689697	0.833447
POLE2	89.406	61.663	339.743	298.225	0.689697	0.877796
MIR1915HG	90.7814	61.663	214.574	178.262	0.679247	0.830771
BOC	93.5324	61.663	1195.29	1042.67	0.659269	0.872312
DCAF5	93.5324	61.663	2595.52	2426.16	0.659269	0.934747
BICRA	94.9079	61.663	2422.21	2186.23	0.649714	0.902576
LCN12	94.9079	61.663	57.77	60.5418	0.649714	1.04798
ZNF396	97.6588	61.663	140.299	100.903	0.631412	0.719202
C10orf143	97.6588	61.663	701.493	605.418	0.631412	0.863043
NAF1	99.0343	61.663	1248.93	1038.18	0.622643	0.831254
CELSR3	100.41	61.663	598.332	554.967	0.614113	0.927523
FOXP1	101.785	61.663	6922.77	6518.34	0.605815	0.941579
RBMX2	103.161	61.663	192.567	154.718	0.597737	0.803452
NAPG	103.161	61.663	558.443	560.573	0.597737	1.00381
IFT20	104.536	61.663	165.057	132.295	0.589872	0.801511
TCF7L2	104.536	61.663	4470.3	4330.98	0.589872	0.968836
FBLIM1	105.912	61.663	643.723	621.115	0.582211	0.964879
NFKBIL1	110.038	61.663	368.628	335.222	0.560378	0.909379
ZSCAN12	114.165	61.663	716.623	687.262	0.540124	0.959028
ZSWIM9	115.54	61.663	976.588	872.251	0.533694	0.893161
NR4A1	122.417	61.663	1775.74	1625.66	0.503711	0.915483
PCGF1	125.168	61.663	317.735	237.683	0.49264	0.748053
CHAF1A	53.6436	62.7841	863.799	946.247	1.17039	1.09545
G0S2	56.3945	62.7841	45.3907	39.2401	1.1133	0.864496
BMP6	57.77	62.7841	346.62	321.769	1.08679	0.928304
LIN7B	68.7738	62.7841	59.1455	44.8458	0.912907	0.758229
CDT1	68.7738	62.7841	331.49	317.284	0.912907	0.957146
GAL	70.1493	62.7841	66.0229	67.2687	0.895007	1.01887
PCNT	71.5248	62.7841	2094.85	2034.88	0.877796	0.971372
PPP2R3A	72.9003	62.7841	1625.81	1510.18	0.861233	0.928878
AADAT	72.9003	62.7841	298.478	278.044	0.861233	0.931538
LHFPL2	77.0267	62.7841	2635.41	2608.91	0.815096	0.989942
SEMA3B	78.4022	62.7841	248.961	227.592	0.800796	0.914168
MAX	78.4022	62.7841	2568.01	2438.49	0.800796	0.949563
EMSY	79.7776	62.7841	1808.75	1674.99	0.786989	0.926048
FIG4	79.7776	62.7841	1002.72	937.277	0.786989	0.934733
TICRR	79.7776	62.7841	738.631	710.806	0.786989	0.962329
GPSM2	82.5286	62.7841	577.7	493.304	0.760756	0.85391
SYNE4	82.5286	62.7841	110.038	95.2974	0.760756	0.866039
NBN	82.5286	62.7841	609.336	593.086	0.760756	0.973331
DGAT2	83.9041	62.7841	187.065	147.991	0.748285	0.791123
ADGRE5	83.9041	62.7841	620.34	566.178	0.748285	0.912691
GPR3	83.9041	62.7841	37.1379	45.967	0.748285	1.23774
THAP12	85.2795	62.7841	596.957	547.119	0.736216	0.916513
TBCD	85.2795	62.7841	2442.85	2466.52	0.736216	1.00969
IFT88	88.0305	62.7841	832.163	715.291	0.713209	0.859556
ZNF561	88.0305	62.7841	722.125	648.022	0.713209	0.897382
ITPA	88.0305	62.7841	631.344	581.874	0.713209	0.921644
TMEM53	88.0305	62.7841	385.133	364.372	0.713209	0.946093
ARMC9	88.0305	62.7841	2840.36	2894.8	0.713209	1.01917
RBM43	90.7814	62.7841	414.018	368.857	0.691597	0.890919
MTMR1	90.7814	62.7841	803.278	788.165	0.691597	0.981186
CDC40	90.7814	62.7841	1065.99	1075.18	0.691597	1.00862
DUSP23	92.1569	62.7841	64.6474	45.967	0.681274	0.711041
Z84492.2	93.5324	62.7841	528.183	534.786	0.671255	1.0125
ARFGEF3	93.5324	62.7841	1287.45	1316.22	0.671255	1.02235
CYB561D2	93.5324	62.7841	284.724	304.952	0.671255	1.07104
MRPL19	94.9079	62.7841	638.221	538.15	0.661527	0.843203
DMXL1	96.2834	62.7841	2412.59	2113.36	0.652077	0.875973
RBM18	97.6588	62.7841	618.964	537.029	0.642893	0.867624
TTC5	97.6588	62.7841	341.118	357.645	0.642893	1.04845
DNMT3A	99.0343	62.7841	2742.7	2519.21	0.633964	0.918516
ADAMTS5	100.41	62.7841	389.26	321.769	0.625279	0.826617
NAA15	100.41	62.7841	4078.29	3704.26	0.625279	0.908289
ZNF436	101.785	62.7841	280.597	250.015	0.616829	0.891012
TVP23C-CDRT4	104.536	62.7841	2468.98	2319.65	0.600597	0.939517
TVP23C	104.536	62.7841	1192.54	1145.81	0.600597	0.960817
DEDD	105.912	62.7841	440.152	346.434	0.592797	0.787077
TMEM106C	105.912	62.7841	143.05	116.599	0.592797	0.815096
FAM171A2	105.912	62.7841	207.697	177.141	0.592797	0.852882
AC098582.1	105.912	62.7841	1165.03	1004.55	0.592797	0.86225
MANEA	105.912	62.7841	222.827	216.381	0.592797	0.971071
ZNF408	107.287	62.7841	196.693	164.808	0.585197	0.837896
PIH1D1	110.038	62.7841	708.37	585.238	0.570567	0.826175
ROGDI	110.038	62.7841	361.75	332.98	0.570567	0.92047
GPS1	115.54	62.7841	390.635	335.222	0.543397	0.858147
SHKBP1	119.666	62.7841	292.976	303.83	0.524659	1.03705
DPH6	121.042	62.7841	1144.4	1088.63	0.518697	0.951272
PFAS	134.797	62.7841	436.026	375.584	0.465769	0.861379
KDM5A	134.797	62.7841	3125.08	3029.33	0.465769	0.969361
LLGL2	52.2681	63.9053	237.957	232.077	1.22264	0.975288
OBSL1	63.2719	63.9053	1111.39	1058.36	1.01001	0.95229
AP4S1	67.3983	63.9053	387.884	362.13	0.948173	0.933603
CASK	67.3983	63.9053	3072.81	2891.43	0.948173	0.940972
EXOSC5	67.3983	63.9053	272.344	267.954	0.948173	0.983878
PAFAH2	70.1493	63.9053	514.428	411.46	0.91099	0.79984
SYT14	70.1493	63.9053	1759.23	1584.18	0.91099	0.900493
NTN4	71.5248	63.9053	2211.77	2283.77	0.893471	1.03256
NDST1	72.9003	63.9053	2735.82	2653.75	0.876613	0.970001
KBTBD3	74.2757	63.9053	181.563	140.143	0.860379	0.771871
IFT57	74.2757	63.9053	425.022	340.828	0.860379	0.801907
WDR46	74.2757	63.9053	372.754	339.707	0.860379	0.911343
WDR41	74.2757	63.9053	1873.4	1733.29	0.860379	0.925212
IL1RAP	75.6512	63.9053	614.838	570.663	0.844736	0.928152
CDK8	77.0267	63.9053	1634.07	1549.42	0.829651	0.948201
DUSP10	77.0267	63.9053	489.67	486.577	0.829651	0.993684
FAM24B	78.4022	63.9053	320.486	306.073	0.815096	0.955027
AC073585.2	78.4022	63.9053	522.681	526.938	0.815096	1.00814
RPP40	79.7776	63.9053	149.927	115.478	0.801043	0.770228
RAB27A	79.7776	63.9053	995.845	919.339	0.801043	0.923175
VEZT	79.7776	63.9053	1463.51	1361.07	0.801043	0.930006
COQ8B	83.9041	63.9053	682.236	625.599	0.761647	0.916983
ISY1	85.2795	63.9053	724.876	632.326	0.749362	0.872323
ISY1-RAB43	85.2795	63.9053	1837.64	1624.54	0.749362	0.884037
HDDC2	85.2795	63.9053	1094.88	1049.39	0.749362	0.958455
SEPT8	85.2795	63.9053	658.853	634.568	0.749362	0.96314
MOXD1	86.655	63.9053	763.389	755.652	0.737468	0.989864
ZNF568	88.0305	63.9053	1629.94	1465.34	0.725945	0.899013
ASB7	89.406	63.9053	691.865	688.383	0.714776	0.994968
PPP2R3C	90.7814	63.9053	927.071	939.52	0.703946	1.01343
RCAN1	93.5324	63.9053	1679.46	1410.4	0.683242	0.839796
C7orf31	93.5324	63.9053	257.214	226.471	0.683242	0.880478
ARSB	93.5324	63.9053	1206.29	1140.2	0.683242	0.945214
WDR54	93.5324	63.9053	72.9003	76.2379	0.683242	1.04578
PLEKHO1	94.9079	63.9053	931.198	839.738	0.67334	0.901783
ATG4C	94.9079	63.9053	455.283	419.308	0.67334	0.920985
ZNF449	96.2834	63.9053	323.237	252.258	0.663721	0.780411
MAIP1	96.2834	63.9053	704.244	619.993	0.663721	0.880367
MRPL16	96.2834	63.9053	156.804	140.143	0.663721	0.893746
AMMECR1L	96.2834	63.9053	1060.49	950.731	0.663721	0.8965
CDK2	96.2834	63.9053	110.038	103.145	0.663721	0.93736
ZNF616	97.6588	63.9053	502.049	384.553	0.654373	0.765967
TEFM	97.6588	63.9053	207.697	171.535	0.654373	0.825892
KIF21A	97.6588	63.9053	911.941	882.341	0.654373	0.967542
NKAPD1	99.0343	63.9053	386.509	315.042	0.645284	0.815096
PTPRG	100.41	63.9053	7043.82	6784.05	0.636445	0.963122
TMUB1	101.785	63.9053	121.042	116.599	0.627844	0.963295
FLYWCH1	103.161	63.9053	877.554	843.101	0.619473	0.96074
SKIV2L	104.536	63.9053	283.348	256.742	0.611322	0.906102
USF3	105.912	63.9053	672.608	612.145	0.603383	0.910107
PXT1	107.287	63.9053	185.689	117.72	0.595647	0.633964
MTA3	107.287	63.9053	2108.61	2022.55	0.595647	0.959187
MRFAP1L1	110.038	63.9053	127.919	127.811	0.580756	0.99915
HLTF	111.414	63.9053	683.612	611.024	0.573586	0.893817
ALKBH1	111.414	63.9053	823.91	759.015	0.573586	0.921235
ELP1	111.414	63.9053	872.052	834.132	0.573586	0.956516
DIS3L	112.789	63.9053	892.684	766.863	0.566591	0.859053
MLPH	116.916	63.9053	1358.97	1236.62	0.546594	0.90997
ZDBF2	125.168	63.9053	493.796	458.548	0.510555	0.928619
ADRA2C	59.1455	65.0264	59.1455	31.3921	1.09943	0.53076
RCOR2	59.1455	65.0264	88.0305	77.359	1.09943	0.878775
CCN3	60.521	65.0264	170.559	132.295	1.07444	0.775656
SAPCD2	60.521	65.0264	49.5172	47.0881	1.07444	0.950945
TEAD3	61.8964	65.0264	814.282	755.652	1.05057	0.927998
AIG1	67.3983	65.0264	1840.39	1635.75	0.964807	0.888808
BCORL1	67.3983	65.0264	880.305	810.588	0.964807	0.920804
PLS3	68.7738	65.0264	834.914	748.925	0.945511	0.897008
CGAS	70.1493	65.0264	828.037	806.103	0.926972	0.973512
DISP3	72.9003	65.0264	138.923	116.599	0.891992	0.839307
COQ4	74.2757	65.0264	460.785	385.674	0.875473	0.836994
RAB20	74.2757	65.0264	149.927	147.991	0.875473	0.987089
UTRN	75.6512	65.0264	6526.64	6086.7	0.859556	0.932593
ZFP1	78.4022	65.0264	225.578	221.987	0.829396	0.984079
INHBE	79.7776	65.0264	273.72	227.592	0.815096	0.83148
OCRL	79.7776	65.0264	570.823	581.874	0.815096	1.01936
INPP5F	81.1531	65.0264	955.956	862.161	0.801281	0.901883
MPP5	81.1531	65.0264	1474.51	1411.52	0.801281	0.957282
CAMKMT	81.1531	65.0264	1496.52	1460.85	0.801281	0.976167
ACTA2	82.5286	65.0264	579.076	511.242	0.787926	0.882859
METTL4	82.5286	65.0264	751.01	668.203	0.787926	0.889738
SLC18B1	83.9041	65.0264	195.318	197.322	0.775009	1.01026
CRAT	83.9041	65.0264	440.152	458.548	0.775009	1.04179
ZNF148	85.2795	65.0264	3349.29	2965.43	0.762509	0.885392
FAM168A	85.2795	65.0264	1650.57	1479.91	0.762509	0.896606
TOX2	85.2795	65.0264	1738.6	1642.48	0.762509	0.944712
AKAP11	85.2795	65.0264	847.294	838.617	0.762509	0.989759
MED30	86.655	65.0264	339.743	263.469	0.750406	0.775496
SLC25A42	86.655	65.0264	872.052	816.194	0.750406	0.935946
TMEM97	88.0305	65.0264	126.544	90.8128	0.738681	0.717639
SH2B1	88.0305	65.0264	1090.75	967.548	0.738681	0.887046
ITPRID2	89.406	65.0264	1309.45	1247.83	0.727316	0.952943
MEGF8	92.1569	65.0264	828.037	791.529	0.705605	0.95591
ETV1	93.5324	65.0264	955.956	843.101	0.695229	0.881946
AC011195.2	94.9079	65.0264	44.0152	50.4515	0.685153	1.14623
NAT14	96.2834	65.0264	149.927	133.416	0.675365	0.889875
TRMT12	96.2834	65.0264	211.823	197.322	0.675365	0.931538
COPG2	96.2834	65.0264	1236.55	1227.65	0.675365	0.992803
HACD1	97.6588	65.0264	409.892	396.885	0.665853	0.968268
MCAT	97.6588	65.0264	220.076	247.773	0.665853	1.12585
MTRF1	99.0343	65.0264	433.275	362.13	0.656605	0.835797
DHX35	99.0343	65.0264	964.209	940.641	0.656605	0.975557
IBA57	101.785	65.0264	444.279	309.436	0.638859	0.696491
DCTN3	103.161	65.0264	127.919	131.174	0.630341	1.02544
INPP5B	104.536	65.0264	2253.03	2116.72	0.622047	0.9395
PIPOX	105.912	65.0264	717.999	624.478	0.613968	0.869748
MDM4	108.663	65.0264	1429.12	1315.1	0.598425	0.920219
RUSC2	110.038	65.0264	2328.68	2138.02	0.590945	0.918126
ECHDC2	111.414	65.0264	649.225	534.786	0.583649	0.82373
HDGFL3	111.414	65.0264	2130.61	1896.98	0.583649	0.890344
VAV2	111.414	65.0264	3306.65	3293.92	0.583649	0.996153
ZNF502	115.54	65.0264	185.689	195.079	0.562804	1.05057
EMC4	116.916	65.0264	173.31	144.628	0.556183	0.834503
ZNF334	119.666	65.0264	382.382	349.797	0.543397	0.914784
LRRC40	121.042	65.0264	565.321	529.181	0.537222	0.936071
SLC22A15	122.417	65.0264	3068.69	2724.38	0.531186	0.887801
TAFA2	126.544	65.0264	339.743	300.467	0.513865	0.884396
KBTBD4	129.295	65.0264	226.954	233.198	0.502932	1.02751
TRANK1	130.67	65.0264	1786.74	1753.47	0.497638	0.981378
TTC28	132.046	65.0264	7885.61	7510.55	0.492454	0.952438
ALG10B	60.521	66.1476	119.666	126.689	1.09297	1.05869
TAPBP	67.3983	66.1476	581.827	617.751	0.981442	1.06174
SARM1	68.7738	66.1476	980.715	977.639	0.961813	0.996863
TESK2	71.5248	66.1476	471.788	506.758	0.92482	1.07412
UNC79	72.9003	66.1476	286.099	227.592	0.907371	0.795502
UBE2E3	75.6512	66.1476	1475.89	1346.5	0.874376	0.91233
KCTD16	75.6512	66.1476	319.111	331.859	0.874376	1.03995
RIPK4	75.6512	66.1476	291.601	334.101	0.874376	1.14575
IGF1R	77.0267	66.1476	7295.53	7105.82	0.858762	0.973997
TMEM255B	78.4022	66.1476	519.93	570.663	0.843696	1.09758
ASPHD2	78.4022	66.1476	134.797	151.355	0.843696	1.12284
PIGL	79.7776	66.1476	1653.32	1620.05	0.829149	0.979878
ZNF552	81.1531	66.1476	281.973	217.502	0.815096	0.771359
MZT2A	81.1531	66.1476	642.348	617.751	0.815096	0.961708
FO393400.1	81.1531	66.1476	1964.18	1916.04	0.815096	0.975489
COMMD7	81.1531	66.1476	658.853	709.685	0.815096	1.07715
FKBP10	82.5286	66.1476	482.792	426.035	0.801511	0.88244
MIEF2	82.5286	66.1476	370.003	330.738	0.801511	0.893878
ZNF501	82.5286	66.1476	111.414	115.478	0.801511	1.03648
MTF2	82.5286	66.1476	779.895	821.8	0.801511	1.05373
CTU2	85.2795	66.1476	244.835	193.958	0.775656	0.7922
AKT1S1	85.2795	66.1476	1880.28	1589.78	0.775656	0.845506
SLC37A1	85.2795	66.1476	1123.76	991.092	0.775656	0.88194
XKR6	85.2795	66.1476	2218.64	2154.84	0.775656	0.971243
RANBP17	85.2795	66.1476	2562.51	2492.31	0.775656	0.972602
LMBRD2	85.2795	66.1476	387.884	391.28	0.775656	1.00875
ABITRAM	86.655	66.1476	225.578	153.597	0.763344	0.680903
EMD	86.655	66.1476	110.038	96.4185	0.763344	0.876228
EPM2A	86.655	66.1476	1232.43	1158.14	0.763344	0.939726
ZDHHC9	86.655	66.1476	474.539	468.639	0.763344	0.987566
ANKRD49	88.0305	66.1476	158.18	132.295	0.751417	0.836359
GINS4	88.0305	66.1476	198.069	205.17	0.751417	1.03585
ZNF234	89.406	66.1476	585.953	465.275	0.739856	0.794049
MED31	89.406	66.1476	272.344	241.046	0.739856	0.885079
BTBD8	89.406	66.1476	518.555	488.819	0.739856	0.942657
SERINC4	90.7814	66.1476	68.7738	62.7841	0.728646	0.912907
NXPH4	92.1569	66.1476	86.655	113.236	0.717771	1.30674
FOXL2	93.5324	66.1476	107.287	99.7819	0.707216	0.930045
CHST15	93.5324	66.1476	1365.85	1333.04	0.707216	0.975981
RGS16	93.5324	66.1476	180.187	182.747	0.707216	1.0142
AC097634.4	94.9079	66.1476	7716.42	7252.69	0.696966	0.939903
EIF4E3	94.9079	66.1476	419.52	439.489	0.696966	1.0476
GPBP1	97.6588	66.1476	2796.34	2633.57	0.677333	0.941791
EIF2S3	97.6588	66.1476	1032.98	1004.55	0.677333	0.972471
RBM48	99.0343	66.1476	418.145	319.526	0.667926	0.764152
RCBTB2	99.0343	66.1476	405.766	340.828	0.667926	0.839963
KAT6B	99.0343	66.1476	2441.47	2371.22	0.667926	0.971227
C1orf21	100.41	66.1476	1599.68	1327.44	0.658776	0.829814
TRMT2A	103.161	66.1476	316.36	280.286	0.641209	0.885974
WDR12	103.161	66.1476	623.091	595.328	0.641209	0.955444
RFXANK	104.536	66.1476	171.935	135.659	0.632772	0.789013
FAM86B1	104.536	66.1476	357.624	348.676	0.632772	0.97498
ZNF140	105.912	66.1476	759.263	713.048	0.624554	0.939132
CDC23	108.663	66.1476	502.049	440.61	0.608743	0.877624
MAPK12	111.414	66.1476	1368.6	1336.41	0.593712	0.976477
TOPBP1	112.789	66.1476	1173.28	1076.3	0.586471	0.917341
GATB	112.789	66.1476	741.382	692.868	0.586471	0.934563
NRBP2	116.916	66.1476	177.436	147.991	0.565772	0.834052
PQBP1	118.291	66.1476	136.172	145.749	0.559194	1.07033
ZFP91	148.551	66.1476	1782.62	1711.99	0.445284	0.960379
ZFP91-CNTF	148.551	66.1476	1920.17	1862.22	0.445284	0.969824
FBXO31	154.053	66.1476	1774.36	1635.75	0.429381	0.92188
SLC25A27	56.3945	67.2687	262.716	229.835	1.19282	0.874841
SATB2	56.3945	67.2687	2031.58	2049.45	1.19282	1.0088
PLD6	61.8964	67.2687	118.291	116.599	1.08679	0.985697
SLF1	66.0229	67.2687	852.795	750.046	1.01887	0.879515
BCL7A	66.0229	67.2687	664.355	637.932	1.01887	0.960227
C18orf54	66.0229	67.2687	261.341	253.379	1.01887	0.969535
LPCAT3	66.0229	67.2687	295.727	299.346	1.01887	1.01224
SLC37A4	70.1493	67.2687	166.433	173.778	0.958936	1.04413
SHBG	70.1493	67.2687	35.7624	39.2401	0.958936	1.09724
ABHD15	74.2757	67.2687	224.203	207.412	0.905662	0.925109
EPHX2	75.6512	67.2687	239.333	243.289	0.889196	1.01653
ZNRF2	77.0267	67.2687	1211.79	1125.63	0.873317	0.928895
HAGHL	78.4022	67.2687	360.375	371.099	0.857996	1.02976
ATP1B2	79.7776	67.2687	8.25286	10.0903	0.843203	1.22264
NUDT1	81.1531	67.2687	206.321	154.718	0.828911	0.749888
NUDT5	81.1531	67.2687	987.592	846.465	0.828911	0.857099
MNAT1	81.1531	67.2687	3031.55	2724.38	0.828911	0.898677
SPRYD3	81.1531	67.2687	623.091	574.026	0.828911	0.921256
ZNF439	81.1531	67.2687	543.313	519.09	0.828911	0.955416
CNNM2	82.5286	67.2687	1389.23	1331.92	0.815096	0.958747
MAN2A1	85.2795	67.2687	2270.91	2089.81	0.788803	0.920254
WDR7	85.2795	67.2687	2972.4	2750.17	0.788803	0.925234
ACVR1	85.2795	67.2687	2548.76	2421.67	0.788803	0.950139
PLEC	86.655	67.2687	5706.85	5655.06	0.776282	0.990924
ZNF516	88.0305	67.2687	4508.81	4152.72	0.764152	0.921024
TMEM135	88.0305	67.2687	1910.54	1803.92	0.764152	0.944197
ZNF142	88.0305	67.2687	806.029	762.379	0.764152	0.945845
ZSCAN9	88.0305	67.2687	198.069	188.352	0.764152	0.950945
DHX33	89.406	67.2687	547.44	477.608	0.752396	0.872439
FMR1	90.7814	67.2687	687.738	588.601	0.740996	0.855851
VRK1	90.7814	67.2687	1206.29	1263.53	0.740996	1.04745
WDR78	92.1569	67.2687	566.696	513.485	0.729937	0.906102
TACC3	92.1569	67.2687	1383.73	1291.56	0.729937	0.93339
CISD1	93.5324	67.2687	343.869	281.407	0.719202	0.818356
TLK1	94.9079	67.2687	3584.49	3287.2	0.708779	0.917061
ZMYM4	94.9079	67.2687	2993.04	3093.24	0.708779	1.03348
PIK3C3	96.2834	67.2687	3515.72	3238.99	0.698654	0.921288
ADCY9	96.2834	67.2687	2700.06	2533.79	0.698654	0.938419
STARD6	97.6588	67.2687	104.536	88.5705	0.688813	0.847271
ZNF318	97.6588	67.2687	1020.6	878.978	0.688813	0.861233
TFE3	97.6588	67.2687	752.386	660.355	0.688813	0.877681
WDR76	97.6588	67.2687	551.566	492.183	0.688813	0.892337
MTO1	97.6588	67.2687	1698.71	1585.3	0.688813	0.933235
IKBKB	97.6588	67.2687	1738.6	1671.63	0.688813	0.961478
ZNF652	97.6588	67.2687	931.198	914.855	0.688813	0.982449
ZNF749	97.6588	67.2687	268.218	285.892	0.688813	1.06589
C9orf64	99.0343	67.2687	407.141	365.493	0.679247	0.897707
ZNF461	99.0343	67.2687	554.317	533.665	0.679247	0.962744
LRRC14	100.41	67.2687	1042.61	958.579	0.669942	0.919402
KBTBD6	101.785	67.2687	141.674	105.388	0.660889	0.743874
ASPSCR1	101.785	67.2687	942.201	900.28	0.660889	0.955507
CARD8	103.161	67.2687	1031.61	964.185	0.652077	0.934643
ADK	105.912	67.2687	6969.54	6298.59	0.63514	0.903732
HIKESHI	105.912	67.2687	574.949	526.938	0.63514	0.916495
C17orf75	105.912	67.2687	381.007	362.13	0.63514	0.950455
VOPP1	111.414	67.2687	2206.26	2023.67	0.603775	0.917237
TSN	112.789	67.2687	448.405	395.764	0.596412	0.882604
R3HDM1	114.165	67.2687	1757.86	1689.57	0.589226	0.96115
ZNF429	115.54	67.2687	580.451	520.211	0.582211	0.896219
ZNF362	127.919	67.2687	1110.01	972.033	0.525868	0.875698
CCNB1IP1	50.8926	68.3899	574.949	526.938	1.34381	0.916495
INIP	64.6474	68.3899	469.037	437.247	1.05789	0.932221
CDKN2D	66.0229	68.3899	101.785	77.359	1.03585	0.760022
BAIAP3	66.0229	68.3899	59.1455	62.7841	1.03585	1.06152
MGAT4A	70.1493	68.3899	383.758	359.888	0.974919	0.937799
CIART	72.9003	68.3899	83.9041	72.8744	0.938129	0.868545
UQCC3	72.9003	68.3899	130.67	114.357	0.938129	0.875156
NUCB1	75.6512	68.3899	543.313	447.337	0.904015	0.82335
ACVR1B	75.6512	68.3899	697.367	581.874	0.904015	0.834388
RAB40C	75.6512	68.3899	541.938	529.181	0.904015	0.97646
VMAC	77.0267	68.3899	111.414	78.4802	0.887872	0.704404
AC104532.1	77.0267	68.3899	291.601	233.198	0.887872	0.799717
ZNF420	77.0267	68.3899	607.961	504.515	0.887872	0.829849
SLC35F2	77.0267	68.3899	264.091	266.833	0.887872	1.01038
RPL39L	77.0267	68.3899	188.44	193.958	0.887872	1.02928
GREB1L	77.0267	68.3899	874.803	928.308	0.887872	1.06116
ZRSR2	77.0267	68.3899	273.72	291.498	0.887872	1.06495
UQCC1	79.7776	68.3899	2353.44	2149.24	0.857256	0.913231
ZNF511	79.7776	68.3899	66.0229	60.5418	0.857256	0.916983
SIN3A	79.7776	68.3899	1817	1782.62	0.857256	0.981077
POP1	81.1531	68.3899	550.191	495.546	0.842726	0.900681
CLEC11A	82.5286	68.3899	447.03	322.89	0.828681	0.7223
CWC27	83.9041	68.3899	2645.04	2385.8	0.815096	0.901989
SMPD4	83.9041	68.3899	1122.39	1107.69	0.815096	0.986905
ALG10	85.2795	68.3899	92.1569	95.2974	0.801949	1.03408
MBD3L1	86.655	68.3899	71.5248	63.9053	0.78922	0.893471
PDK2	86.655	68.3899	387.884	358.766	0.78922	0.924932
COIL	86.655	68.3899	517.179	497.789	0.78922	0.962507
ZFP2	88.0305	68.3899	374.13	422.672	0.776888	1.12975
C3orf18	89.406	68.3899	156.804	119.963	0.764936	0.765046
ELF2	89.406	68.3899	2953.15	2508	0.764936	0.849264
GJA1	90.7814	68.3899	646.474	547.119	0.753346	0.846312
MDH1	90.7814	68.3899	581.827	495.546	0.753346	0.851708
SLC19A1	90.7814	68.3899	415.394	438.368	0.753346	1.05531
TIMM10	90.7814	68.3899	94.9079	133.416	0.753346	1.40575
MARC2	92.1569	68.3899	160.931	176.02	0.742102	1.09376
CWF19L1	92.1569	68.3899	592.83	652.507	0.742102	1.10066
TRMO	93.5324	68.3899	466.287	385.674	0.731189	0.827118
CSNK1G1	93.5324	68.3899	2452.47	2210.9	0.731189	0.901497
APOL6	93.5324	68.3899	939.45	865.524	0.731189	0.921309
UTP25	93.5324	68.3899	1352.09	1368.92	0.731189	1.01244
TYW3	94.9079	68.3899	592.83	496.667	0.720592	0.83779
SCYL2	94.9079	68.3899	1548.79	1342.01	0.720592	0.866492
MSRA	94.9079	68.3899	1898.16	1728.81	0.720592	0.910781
CASC4	94.9079	68.3899	1657.45	1511.3	0.720592	0.911825
ZNF555	96.2834	68.3899	566.696	485.456	0.710298	0.856642
ARID5B	96.2834	68.3899	8924.09	8192.21	0.710298	0.917988
AKT2	97.6588	68.3899	1705.59	1519.15	0.700294	0.89069
BAP1	97.6588	68.3899	376.881	359.888	0.700294	0.954912
PHF21A	99.0343	68.3899	4170.44	3722.2	0.690567	0.892519
PROX1	99.0343	68.3899	191.191	197.322	0.690567	1.03206
SGO2	100.41	68.3899	477.29	408.097	0.681108	0.855029
CASD1	100.41	68.3899	537.811	523.575	0.681108	0.973529
RASA1	101.785	68.3899	2599.65	2368.98	0.671903	0.911269
DCK	103.161	68.3899	459.409	438.368	0.662945	0.954199
RTCA	104.536	68.3899	863.799	850.949	0.654222	0.985124
SRP54	105.912	68.3899	1292.95	1161.51	0.645725	0.89834
SCYL3	105.912	68.3899	957.332	875.614	0.645725	0.914641
GCA	108.663	68.3899	639.597	552.725	0.629378	0.864177
XPO7	110.038	68.3899	1888.53	1782.62	0.621511	0.94392
IFIH1	111.414	68.3899	1360.35	1315.1	0.613838	0.966742
AFG1L	111.414	68.3899	1319.08	1279.23	0.613838	0.969786
KPNA5	112.789	68.3899	925.696	798.255	0.606352	0.86233
FKBP8	112.789	68.3899	502.049	545.998	0.606352	1.08754
NLE1	114.165	68.3899	691.865	692.868	0.599046	1.00145
GLT8D2	116.916	68.3899	848.669	737.714	0.584951	0.86926
ATG13	116.916	68.3899	1393.36	1311.74	0.584951	0.941424
CALR3	123.793	68.3899	57.77	62.7841	0.552454	1.08679
ERGIC2	129.295	68.3899	866.55	701.837	0.528945	0.809921
MTERF4	129.295	68.3899	1097.63	1003.43	0.528945	0.914174
ATP5PB	138.923	68.3899	480.041	364.372	0.492286	0.759043
PPFIBP2	57.77	69.511	781.271	735.471	1.20324	0.941378
STK26	59.1455	69.511	145.801	107.63	1.17525	0.7382
FKBP1B	59.1455	69.511	57.77	43.7247	1.17525	0.756875
MOSPD3	64.6474	69.511	12.3793	31.3921	1.07523	2.53585
TUBA4A	66.0229	69.511	53.6436	58.2996	1.05283	1.08679
STK35	72.9003	69.511	2246.15	2121.21	0.953508	0.944373
PHLPP1	75.6512	69.511	2299.8	2150.36	0.918835	0.93502
SYS1-DBNDD2	77.0267	69.511	752.386	680.535	0.902428	0.904503
SYS1	77.0267	69.511	415.394	376.705	0.902428	0.906862
ORC2	77.0267	69.511	942.201	890.189	0.902428	0.944797
ZBTB37	78.4022	69.511	705.619	551.603	0.886596	0.781729
AMPD2	78.4022	69.511	353.497	343.07	0.886596	0.970503
HSD17B10	78.4022	69.511	57.77	78.4802	0.886596	1.35849
CPPED1	79.7776	69.511	1265.44	1287.07	0.871309	1.0171
TADA1	79.7776	69.511	272.344	289.255	0.871309	1.06209
RBIS	81.1531	69.511	191.191	128.932	0.856541	0.67436
ING4	81.1531	69.511	482.792	435.004	0.856541	0.901018
E2F6	81.1531	69.511	687.738	650.264	0.856541	0.945511
HAUS8	81.1531	69.511	403.015	403.612	0.856541	1.00148
NUDT12	81.1531	69.511	125.168	125.568	0.856541	1.00319
IRX5	82.5286	69.511	147.176	119.963	0.842266	0.815096
KIAA1671	85.2795	69.511	1148.52	1137.96	0.815096	0.990805
PLP2	86.655	69.511	147.176	124.447	0.802158	0.845567
ZNF66	86.655	69.511	299.854	266.833	0.802158	0.889875
C17orf80	86.655	69.511	408.517	394.643	0.802158	0.96604
NCAPG2	88.0305	69.511	574.949	538.15	0.789624	0.935995
ATP2B4	88.0305	69.511	2777.09	2967.67	0.789624	1.06863
RUVBL2	89.406	69.511	398.888	403.612	0.777476	1.01184
THBS3	89.406	69.511	546.064	579.632	0.777476	1.06147
ZHX1	90.7814	69.511	221.452	181.626	0.765696	0.820159
ZHX1-C8orf76	90.7814	69.511	1030.23	902.522	0.765696	0.876038
TNRC18	90.7814	69.511	4072.79	3964.37	0.765696	0.97338
ALAD	93.5324	69.511	211.823	159.203	0.743176	0.751582
NIF3L1	96.2834	69.511	339.743	289.255	0.721942	0.851396
SRSF8	99.0343	69.511	401.639	297.104	0.701888	0.739727
Z82190.2	99.0343	69.511	3270.88	2927.31	0.701888	0.89496
DEPDC5	99.0343	69.511	1612.06	1497.85	0.701888	0.929154
MRPL9	100.41	69.511	114.165	93.0551	0.692273	0.815096
RPL27	100.41	69.511	658.853	556.088	0.692273	0.844024
DMAC2	101.785	69.511	254.463	226.471	0.682918	0.889997
DOLPP1	101.785	69.511	247.586	252.258	0.682918	1.01887
TMEM143	101.785	69.511	250.337	274.681	0.682918	1.09724
TMEM167B	103.161	69.511	264.091	217.502	0.673813	0.823587
TMEM218	104.536	69.511	199.444	146.87	0.664947	0.736397
ZNF600	105.912	69.511	482.792	418.187	0.656311	0.866185
ZNF473	108.663	69.511	826.661	719.775	0.639696	0.870701
PHF5A	108.663	69.511	408.517	385.674	0.639696	0.944084
MKRN2OS	112.789	69.511	82.5286	53.815	0.616292	0.652077
EPSTI1	112.789	69.511	2547.38	2459.79	0.616292	0.965616
SNRPE	114.165	69.511	478.666	437.247	0.608867	0.91347
DLAT	114.165	69.511	693.24	651.385	0.608867	0.939624
RNF219	115.54	69.511	922.945	809.467	0.601618	0.877048
STPG1	115.54	69.511	962.834	926.066	0.601618	0.961813
EXOSC9	115.54	69.511	353.497	369.978	0.601618	1.04662
MRPL18	118.291	69.511	255.839	226.471	0.587627	0.885212
LOX	119.666	69.511	524.057	395.764	0.580873	0.755194
SLC9B2	119.666	69.511	834.914	719.775	0.580873	0.862095
ABL2	122.417	69.511	3869.22	3557.39	0.56782	0.91941
ZC3H18	122.417	69.511	1617.56	1557.27	0.56782	0.962728
CUL2	126.544	69.511	1757.86	1531.48	0.549304	0.871221
CALD1	126.544	69.511	3255.75	3125.75	0.549304	0.960071
TIMM17B	130.67	69.511	112.789	106.509	0.531957	0.944318
STPG2	134.797	69.511	309.482	244.41	0.515673	0.789737
JRK	136.172	69.511	309.482	339.707	0.510464	1.09766
TGDS	145.801	69.511	455.283	399.128	0.476754	0.876659
RHOBTB1	55.0191	70.6322	702.868	658.112	1.28378	0.936324
FXN	66.0229	70.6322	581.827	591.965	1.06981	1.01742
AL358113.1	66.0229	70.6322	1309.45	1337.53	1.06981	1.02144
ATP6V1H	67.3983	70.6322	3019.17	2735.59	1.04798	0.906075
SESN3	68.7738	70.6322	313.609	239.925	1.02702	0.765046
IGFBP2	70.1493	70.6322	426.398	421.551	1.00688	0.988632
TPRA1	74.2757	70.6322	826.661	788.165	0.950945	0.953432
ZBTB40	75.6512	70.6322	1254.43	1179.44	0.933655	0.94022
AC090360.1	77.0267	70.6322	444.279	411.46	0.916983	0.926131
RBFA	77.0267	70.6322	236.582	219.744	0.916983	0.92883
TOP1MT	77.0267	70.6322	269.593	300.467	0.916983	1.11452
TMEM9B	78.4022	70.6322	580.451	520.211	0.900896	0.896219
LRRC8B	78.4022	70.6322	309.482	319.526	0.900896	1.03245
AC253572.1	79.7776	70.6322	1660.2	1477.67	0.885363	0.890055
NBPF26	79.7776	70.6322	3332.78	2984.49	0.885363	0.895495
CACNA2D2	79.7776	70.6322	140.299	139.022	0.885363	0.990901
ITGA7	79.7776	70.6322	93.5324	105.388	0.885363	1.12675
FZD2	79.7776	70.6322	213.199	273.559	0.885363	1.28312
PRKAR2B	81.1531	70.6322	401.639	383.432	0.870357	0.954667
ZDHHC14	82.5286	70.6322	2385.08	2178.39	0.855851	0.91334
ELMOD3	83.9041	70.6322	801.903	751.167	0.84182	0.936731
C11orf1	86.655	70.6322	261.341	147.991	0.815096	0.566277
POLD3	86.655	70.6322	1010.98	984.366	0.815096	0.973679
TBC1D9	89.406	70.6322	1748.23	1631.27	0.790016	0.933096
GEMIN5	89.406	70.6322	818.409	767.985	0.790016	0.938388
ECH1	89.406	70.6322	364.501	347.555	0.790016	0.953508
METTL8	92.1569	70.6322	1228.3	1114.42	0.766433	0.907285
PPIC	92.1569	70.6322	251.712	238.804	0.766433	0.948718
TPGS2	92.1569	70.6322	1053.62	1004.55	0.766433	0.953428
NTAN1	93.5324	70.6322	356.248	321.769	0.755162	0.903214
CLASP2	93.5324	70.6322	2683.55	2555.09	0.755162	0.952129
ITGB5	93.5324	70.6322	2511.62	2473.25	0.755162	0.984722
YTHDC2	94.9079	70.6322	1155.4	1071.81	0.744218	0.927657
FBXO17	97.6588	70.6322	598.332	547.119	0.723254	0.914406
ZNF92	97.6588	70.6322	292.976	287.013	0.723254	0.979646
EGFL7	99.0343	70.6322	158.18	145.749	0.713209	0.921413
ATP6V0A1	100.41	70.6322	1665.7	1495.61	0.703439	0.897884
ARAP3	101.785	70.6322	569.447	479.85	0.693933	0.84266
RRS1	103.161	70.6322	170.559	113.236	0.684681	0.663909
TENM4	103.161	70.6322	1746.86	1671.63	0.684681	0.956935
TBX4	107.287	70.6322	803.278	769.106	0.658347	0.957459
FAAP24	110.038	70.6322	96.2834	70.6322	0.641888	0.733586
TTLL4	111.414	70.6322	576.325	530.302	0.633964	0.920144
CWF19L2	118.291	70.6322	1126.52	1098.72	0.597105	0.975328
ZAR1L	119.666	70.6322	96.2834	73.9956	0.590242	0.768519
FKBP2	119.666	70.6322	309.482	295.982	0.590242	0.956379
AP001453.5	119.666	70.6322	309.482	295.982	0.590242	0.956379
PNKP	121.042	70.6322	2020.57	1783.74	0.583535	0.882789
NBPF9	121.042	70.6322	1127.89	1025.85	0.583535	0.909528
HMBS	123.793	70.6322	211.823	159.203	0.570567	0.751582
ALKBH3	123.793	70.6322	691.865	603.176	0.570567	0.871812
ADAL	123.793	70.6322	262.716	230.956	0.570567	0.879109
NDUFV1	125.168	70.6322	170.559	176.02	0.564297	1.03202
MRTO4	126.544	70.6322	299.854	315.042	0.558164	1.05065
BABAM1	134.797	70.6322	433.275	405.855	0.52399	0.936713
AC010463.1	134.797	70.6322	533.685	519.09	0.52399	0.972653
HAS2	45.3907	71.7533	187.065	169.293	1.58079	0.904996
N4BP2L1	52.2681	71.7533	682.236	659.233	1.37279	0.966283
RNF227	59.1455	71.7533	148.551	179.383	1.21317	1.20755
CCNB1	63.2719	71.7533	281.973	234.319	1.13405	0.831
AUNIP	68.7738	71.7533	163.682	143.507	1.04332	0.876742
PITPNC1	68.7738	71.7533	2328.68	2257.99	1.04332	0.969642
TTC23L	70.1493	71.7533	70.1493	62.7841	1.02287	0.895007
TIMM8A	70.1493	71.7533	66.0229	60.5418	1.02287	0.916983
MEMO1	71.5248	71.7533	2621.66	2309.56	1.00319	0.880954
EVL	71.5248	71.7533	965.585	983.244	1.00319	1.01829
FNDC4	72.9003	71.7533	33.0114	19.0595	0.984267	0.57736
GGH	74.2757	71.7533	206.321	140.143	0.96604	0.679247
SSMEM1	77.0267	71.7533	64.6474	51.5727	0.931538	0.797753
SCN1B	79.7776	71.7533	152.678	91.9339	0.899416	0.602143
ECHDC1	79.7776	71.7533	1339.71	1247.83	0.899416	0.931419
TMEM106A	81.1531	71.7533	423.647	459.67	0.884172	1.08503
SSR4	81.1531	71.7533	185.689	210.775	0.884172	1.1351
GPHN	82.5286	71.7533	3290.14	3077.54	0.869436	0.935384
PPP1R11	83.9041	71.7533	86.655	104.267	0.855183	1.20324
PLCG1	85.2795	71.7533	1557.04	1487.76	0.841389	0.955506
CLDN6	86.655	71.7533	162.306	119.963	0.828034	0.739112
AD000671.1	86.655	71.7533	917.443	737.714	0.828034	0.804098
PSENEN	86.655	71.7533	66.0229	60.5418	0.828034	0.916983
TSR2	86.655	71.7533	255.839	238.804	0.828034	0.933416
ELMSAN1	86.655	71.7533	1467.63	1422.73	0.828034	0.969407
REL	88.0305	71.7533	632.719	543.755	0.815096	0.859395
THAP2	88.0305	71.7533	606.585	593.086	0.815096	0.977745
CEP290	88.0305	71.7533	734.504	760.137	0.815096	1.0349
FAM122B	89.406	71.7533	246.21	248.894	0.802556	1.0109
SDHAF1	89.406	71.7533	50.8926	59.4207	0.802556	1.16757
BMP4	92.1569	71.7533	565.321	461.912	0.778599	0.817079
MRPS5	92.1569	71.7533	753.761	662.597	0.778599	0.879054
PHLDB3	92.1569	71.7533	486.919	436.126	0.778599	0.895685
ZFPM1	93.5324	71.7533	1761.99	1507.94	0.767149	0.855819
FAM92A	93.5324	71.7533	427.773	376.705	0.767149	0.880618
RNF139	93.5324	71.7533	297.103	275.802	0.767149	0.928304
HOMER2	93.5324	71.7533	660.229	648.022	0.767149	0.981511
CAMTA2	94.9079	71.7533	1199.42	1011.27	0.756031	0.843138
HACL1	94.9079	71.7533	568.072	523.575	0.756031	0.92167
SELENBP1	94.9079	71.7533	33.0114	35.8766	0.756031	1.08679
ZNF169	96.2834	71.7533	437.402	413.703	0.745231	0.945819
GOLPH3L	97.6588	71.7533	814.282	726.502	0.734734	0.8922
SMARCAL1	97.6588	71.7533	1089.38	1040.42	0.734734	0.955062
ERMAP	99.0343	71.7533	408.517	391.28	0.72453	0.957806
WDR60	99.0343	71.7533	1418.12	1444.04	0.72453	1.01828
CDC26	101.785	71.7533	433.275	358.766	0.704948	0.828034
LCORL	101.785	71.7533	2565.26	2270.32	0.704948	0.885024
CNTROB	103.161	71.7533	327.363	306.073	0.695549	0.934963
NUP205	103.161	71.7533	1528.15	1477.67	0.695549	0.966963
MRPL52	103.161	71.7533	286.099	278.044	0.695549	0.971845
CDHR3	103.161	71.7533	1143.02	1158.14	0.695549	1.01323
AC092835.1	104.536	71.7533	464.911	338.586	0.686397	0.728281
ATN1	104.536	71.7533	2068.72	1966.49	0.686397	0.950584
BRCC3	104.536	71.7533	458.034	465.275	0.686397	1.01581
TMEM200B	105.912	71.7533	453.907	439.489	0.677482	0.968235
PRPF38A	105.912	71.7533	464.911	495.546	0.677482	1.06589
LIN52	107.287	71.7533	1299.83	1218.68	0.668797	0.937576
KCTD21	108.663	71.7533	416.769	363.251	0.660331	0.871588
SHROOM1	108.663	71.7533	350.747	320.648	0.660331	0.914186
TMEM86A	110.038	71.7533	134.797	116.599	0.652077	0.865
UBE3D	110.038	71.7533	1169.16	1142.45	0.652077	0.977156
ELOB	110.038	71.7533	350.747	343.07	0.652077	0.978115
PHF2	110.038	71.7533	1607.93	1732.17	0.652077	1.07727
ZNF550	111.414	71.7533	675.359	584.117	0.644026	0.864898
METTL6	112.789	71.7533	866.55	806.103	0.636172	0.930244
TMEM60	112.789	71.7533	129.295	186.11	0.636172	1.43942
BPNT1	115.54	71.7533	240.708	195.079	0.621025	0.810438
SPAST	116.916	71.7533	1103.13	908.128	0.613719	0.823227
LRRC8E	116.916	71.7533	148.551	135.659	0.613719	0.913209
PRSS27	119.666	71.7533	237.957	233.198	0.599611	0.98
ACTL6A	122.417	71.7533	453.907	429.399	0.586136	0.946005
C1D	123.793	71.7533	376.881	319.526	0.579624	0.847819
GABARAPL2	129.295	71.7533	451.156	433.883	0.554959	0.961714
TADA3	130.67	71.7533	537.811	475.366	0.549117	0.883889
ZNF528	154.053	71.7533	569.447	486.577	0.465769	0.854473
AC026316.4	71.5248	72.8744	1323.21	1084.15	1.01887	0.819332
CLDN11	71.5248	72.8744	778.52	733.229	1.01887	0.941825
RGS10	71.5248	72.8744	330.114	312.8	1.01887	0.947549
NT5DC1	74.2757	72.8744	892.684	797.134	0.981134	0.892963
ZNHIT1	74.2757	72.8744	105.912	123.326	0.981134	1.16442
PFKFB3	75.6512	72.8744	4258.48	3920.65	0.963295	0.920669
PTGES2	77.0267	72.8744	244.835	236.562	0.946093	0.966209
PDSS1	78.4022	72.8744	927.071	821.8	0.929495	0.886447
ZSWIM3	78.4022	72.8744	253.088	251.137	0.929495	0.992291
PPAT	79.7776	72.8744	389.26	355.403	0.91347	0.913023
FP565260.1	79.7776	72.8744	327.363	302.709	0.91347	0.924689
NIPAL2	79.7776	72.8744	760.639	787.044	0.91347	1.03471
CD9	79.7776	72.8744	751.01	778.075	0.91347	1.03604
PKD2L2	79.7776	72.8744	39.8888	47.0881	0.91347	1.18048
DKK3	81.1531	72.8744	1676.71	1639.11	0.897987	0.97758
PATJ	81.1531	72.8744	3060.44	2997.94	0.897987	0.97958
SMPD2	81.1531	72.8744	100.41	106.509	0.897987	1.06074
ANP32A	82.5286	72.8744	1547.41	1354.34	0.883021	0.875232
HDAC11	82.5286	72.8744	363.126	344.192	0.883021	0.947858
MACROD2	86.655	72.8744	1609.31	1516.91	0.840972	0.942585
ZNF57	88.0305	72.8744	254.463	215.26	0.827832	0.845937
STX8	88.0305	72.8744	2679.43	2670.57	0.827832	0.996693
YAF2	88.0305	72.8744	1100.38	1122.27	0.827832	1.01989
ASAH2B	88.0305	72.8744	275.095	301.588	0.827832	1.0963
PLOD3	89.406	72.8744	570.823	487.698	0.815096	0.854378
L2HGDH	93.5324	72.8744	419.52	461.912	0.779136	1.10105
KLHDC4	96.2834	72.8744	1486.89	1348.74	0.756875	0.907086
TRIM14	96.2834	72.8744	1225.55	1309.5	0.756875	1.0685
AFMID	96.2834	72.8744	155.429	171.535	0.756875	1.10363
DPYD	99.0343	72.8744	3921.48	3578.7	0.73585	0.912587
COA3	100.41	72.8744	297.103	217.502	0.72577	0.732077
AGFG2	100.41	72.8744	330.114	334.101	0.72577	1.01208
ATG2B	101.785	72.8744	1386.48	1252.32	0.715963	0.903236
INVS	101.785	72.8744	2533.63	2392.52	0.715963	0.944308
CIB1	101.785	72.8744	94.9079	95.2974	0.715963	1.0041
PHF6	103.161	72.8744	767.516	633.447	0.706416	0.825321
CCDC14	103.161	72.8744	1269.56	1117.78	0.706416	0.880445
ZNF780B	103.161	72.8744	830.788	747.804	0.706416	0.900114
SNIP1	103.161	72.8744	679.485	631.205	0.706416	0.928945
GNS	104.536	72.8744	1118.26	965.306	0.697122	0.86322
ZNF879	104.536	72.8744	180.187	192.837	0.697122	1.0702
CCDC69	104.536	72.8744	94.9079	102.024	0.697122	1.07498
UBE2E2	105.912	72.8744	4389.15	4134.78	0.688068	0.942048
PTGIS	105.912	72.8744	2814.22	2842.1	0.688068	1.00991
ZNF626	108.663	72.8744	810.156	726.502	0.670649	0.896744
PAM	108.663	72.8744	4114.05	3708.75	0.670649	0.901484
VRK2	110.038	72.8744	1689.09	1691.81	0.662265	1.00161
CDK11B	112.789	72.8744	803.278	774.711	0.646113	0.964437
POLR2K	114.165	72.8744	86.655	70.6322	0.638328	0.815096
HLA-F	114.165	72.8744	678.11	650.264	0.638328	0.958936
EYA3	115.54	72.8744	1750.98	1688.44	0.630729	0.964285
PDK1	116.916	72.8744	960.083	924.945	0.623309	0.963401
STAG1	116.916	72.8744	7511.48	7293.05	0.623309	0.970921
EPB41L2	118.291	72.8744	1883.03	1768.05	0.616061	0.938938
AL162231.3	118.291	72.8744	493.796	496.667	0.616061	1.00581
TOX4	119.666	72.8744	733.129	577.39	0.60898	0.787569
GTF2F1	119.666	72.8744	385.133	348.676	0.60898	0.905339
SRP72	122.417	72.8744	1050.86	913.733	0.595295	0.869507
COX8A	123.793	72.8744	148.551	125.568	0.58868	0.845285
AP000721.1	123.793	72.8744	1015.1	866.645	0.58868	0.853752
AHI1	137.548	72.8744	2339.69	2195.2	0.529812	0.938247
ZNF138	138.923	72.8744	480.041	439.489	0.524567	0.915523
DNAJC14	141.674	72.8744	398.888	332.98	0.514381	0.834771
SOX4	66.0229	73.9956	334.241	258.985	1.12076	0.774844
AC112128.1	66.0229	73.9956	735.88	841.98	1.12076	1.14418
SPICE1	66.0229	73.9956	345.245	411.46	1.12076	1.19179
ZNF430	68.7738	73.9956	777.144	672.687	1.07593	0.865589
MAST3	68.7738	73.9956	687.738	645.78	1.07593	0.938991
CASTOR3	75.6512	73.9956	1396.11	1224.29	0.978115	0.876931
ODF2L	77.0267	73.9956	741.382	661.476	0.960649	0.89222
SERPINI1	77.0267	73.9956	152.678	137.901	0.960649	0.903214
GPATCH11	78.4022	73.9956	149.927	137.901	0.943795	0.919787
PCDH9	79.7776	73.9956	215.95	186.11	0.927523	0.861821
GDF6	81.1531	73.9956	107.287	98.6608	0.911802	0.919595
TMEM63B	82.5286	73.9956	679.485	671.566	0.896606	0.988345
CNOT10	83.9041	73.9956	1261.31	1137.96	0.881907	0.902205
CHST2	85.2795	73.9956	81.1531	52.6938	0.867683	0.649314
SYNE2	85.2795	73.9956	2617.53	2428.4	0.867683	0.927745
ATF7IP2	85.2795	73.9956	683.612	642.416	0.867683	0.939738
SDF2	85.2795	73.9956	392.011	368.857	0.867683	0.940935
TTLL7	85.2795	73.9956	624.466	591.965	0.867683	0.947953
NBEA	86.655	73.9956	4244.72	3833.2	0.85391	0.90305
UBAC1	86.655	73.9956	507.551	459.67	0.85391	0.905662
NR3C1	88.0305	73.9956	4330	3927.37	0.840568	0.907014
CCDC114	88.0305	73.9956	204.946	200.685	0.840568	0.979209
DCLRE1B	89.406	73.9956	158.18	153.597	0.827636	0.971027
LYST	90.7814	73.9956	2435.97	2266.96	0.815096	0.930618
UTP14A	90.7814	73.9956	599.708	579.632	0.815096	0.966524
MAP4K2	90.7814	73.9956	316.36	308.315	0.815096	0.974571
CYB561D1	90.7814	73.9956	237.957	267.954	0.815096	1.12606
PIGC	93.5324	73.9956	547.44	484.335	0.791123	0.884727
ZKSCAN3	93.5324	73.9956	382.382	391.28	0.791123	1.02327
UBE2T	94.9079	73.9956	148.551	123.326	0.779657	0.83019
AC092329.3	94.9079	73.9956	1284.7	1100.96	0.779657	0.856985
FAM172A	94.9079	73.9956	4755.02	4466.64	0.779657	0.939353
UBE4B	94.9079	73.9956	3063.19	3041.67	0.779657	0.992975
ZNF45	96.2834	73.9956	522.681	472.002	0.768519	0.90304
CAMKK1	96.2834	73.9956	980.715	976.518	0.768519	0.99572
CXXC1	97.6588	73.9956	180.187	163.687	0.757695	0.908428
TMED8	97.6588	73.9956	375.505	374.463	0.757695	0.997224
GRIPAP1	97.6588	73.9956	508.926	523.575	0.757695	1.02878
POLR3H	99.0343	73.9956	1165.03	1135.72	0.747171	0.974843
ZNF675	99.0343	73.9956	873.428	861.04	0.747171	0.985817
ZNF174	100.41	73.9956	199.444	171.535	0.736936	0.860067
PSMB7	104.536	73.9956	2510.24	2314.04	0.707846	0.92184
LPCAT4	104.536	73.9956	123.793	122.205	0.707846	0.987172
ZNF571	105.912	73.9956	447.03	415.945	0.698654	0.930463
GTF3C5	107.287	73.9956	716.623	690.626	0.689697	0.963722
RSRC1	107.287	73.9956	3673.9	3631.39	0.689697	0.98843
UBTF	108.663	73.9956	1299.83	1140.2	0.680966	0.877198
DCAF4	110.038	73.9956	1049.49	911.491	0.672454	0.86851
CAST	110.038	73.9956	4611.97	4299.59	0.672454	0.932267
UBQLN4	111.414	73.9956	870.677	730.987	0.664152	0.839562
CSTF1	111.414	73.9956	462.16	399.128	0.664152	0.863614
CEBPZOS	112.789	73.9956	407.141	384.553	0.656053	0.94452
IFT27	114.165	73.9956	496.547	377.826	0.648149	0.760907
FBXO8	115.54	73.9956	488.294	477.608	0.640433	0.978115
USP16	116.916	73.9956	484.168	440.61	0.632898	0.910036
ZNHIT6	116.916	73.9956	1041.24	968.67	0.632898	0.930308
UFC1	118.291	73.9956	198.069	140.143	0.625539	0.707549
SENP8	118.291	73.9956	244.835	179.383	0.625539	0.73267
ORC3	118.291	73.9956	1105.88	1028.09	0.625539	0.929655
POLR3F	118.291	73.9956	272.344	267.954	0.625539	0.983878
SSRP1	119.666	73.9956	368.628	326.253	0.618349	0.885048
MSMO1	119.666	73.9956	444.279	413.703	0.618349	0.931178
LMAN2L	123.793	73.9956	610.712	548.24	0.597737	0.897707
PPARG	126.544	73.9956	1552.91	1467.58	0.584743	0.945049
REXO4	126.544	73.9956	449.781	427.156	0.584743	0.949699
IQCB1	127.919	73.9956	1264.06	1142.45	0.578455	0.90379
MCTS1	127.919	73.9956	397.513	383.432	0.578455	0.964577
PDCL	129.295	73.9956	577.7	415.945	0.572301	0.720001
DCTN4	136.172	73.9956	1191.16	964.185	0.543397	0.809449
HTATIP2	140.299	73.9956	491.045	459.67	0.527415	0.936105
METTL14	145.801	73.9956	653.351	561.694	0.507513	0.859712
ICOSLG	61.8964	75.1167	199.444	156.96	1.21359	0.786989
SLC9A3R2	64.6474	75.1167	445.654	390.159	1.16195	0.875473
PGGHG	74.2757	75.1167	104.536	77.359	1.01132	0.740021
SVBP	74.2757	75.1167	110.038	98.6608	1.01132	0.896606
[truncated: 7,944 more rows]

## Sheet: Effect of IE2 Depletion filterd
Gene Name	Control Pause Region	dTAG Pause Region	Control Gene Body	dTAG Gene Body	dTAG Pause Region / Control Pause Region	dTAG Gene Body / Control Pause Region	Pause	Gene Body
PFKM	86.655	24.6652	697.367	609.903	0.284637	0.87458	0.360757	0.93728
CPED1	74.2757	21.3018	1712.47	1615.57	0.286793	0.943416	0.36349	1.01105
CFH	101.785	34.7555	426.398	436.126	0.341459	1.02281	0.432775	1.09614
SPATA17	61.8964	21.3018	196.693	195.079	0.344152	0.991795	0.436188	1.0629
CLOCK	59.1455	21.3018	2334.18	2056.18	0.360159	0.880899	0.456475	0.944052
EIF3H	79.7776	29.1498	2647.79	2519.21	0.365388	0.951439	0.463103	1.01965
ZBTB20	97.6588	35.8766	3756.43	3705.39	0.367367	0.986412	0.465612	1.05713
GSTCD	100.41	36.9978	891.309	808.346	0.368468	0.90692	0.467007	0.971938
TRAPPC13	115.54	42.6035	675.359	549.361	0.368734	0.813436	0.467344	0.871752
SHLD3	115.54	42.6035	116.916	98.6608	0.368734	0.843864	0.467344	0.904361
INTS9	75.6512	28.0286	1361.72	1280.35	0.370498	0.940242	0.46958	1.00765
ZNF416	78.4022	29.1498	258.59	204.048	0.371798	0.789082	0.471228	0.845652
IGF2BP3	63.2719	24.6652	1896.78	1703.02	0.389828	0.897847	0.49408	0.962214
KRR1	114.165	44.8458	634.095	570.663	0.392817	0.899965	0.497868	0.964484
ZNF608	79.7776	31.3921	1603.81	1438.43	0.393495	0.896885	0.498726	0.961184
CHCHD5	90.7814	35.8766	221.452	158.081	0.395198	0.713842	0.500885	0.765018
SESN1	50.8926	20.1806	1148.52	1000.06	0.396533	0.870737	0.502578	0.933161
ZNF790	56.3945	22.4229	966.96	802.74	0.397608	0.830169	0.50394	0.889684
HSP90B1	56.3945	22.4229	2034.33	1792.71	0.397608	0.881229	0.50394	0.944405
TRMT1	64.6474	25.7863	442.903	364.372	0.398877	0.82269	0.505548	0.881669
LRSAM1	151.302	60.5418	1477.26	1431.7	0.400138	0.96916	0.507146	1.03864
ZNF487	105.912	42.6035	169.184	169.293	0.402255	1.00065	0.50983	1.07238
DCTN6	108.663	43.7247	506.175	463.033	0.402389	0.914768	0.51	0.980348
IFI44L	77.0267	31.3921	1357.6	1330.8	0.407548	0.980262	0.516538	1.05054
ZNF277	85.2795	34.7555	1019.23	1019.12	0.407548	0.999895	0.516538	1.07158
GTF2IRD2	71.5248	29.1498	983.466	844.222	0.407548	0.858416	0.516538	0.919956
SCRN2	82.5286	33.6344	126.544	106.509	0.407548	0.841675	0.516538	0.902015
MYNN	473.164	193.958	656.102	617.751	0.409917	0.941547	0.519541	1.00905
PIGB	89.406	36.9978	387.884	352.04	0.413818	0.907589	0.524485	0.972655
UBXN6	75.6512	31.3921	649.225	718.654	0.414958	1.10694	0.52593	1.1863
KAT5	140.299	58.2996	606.585	587.48	0.415539	0.968504	0.526666	1.03794
UPRT	56.3945	23.5441	277.846	245.531	0.417488	0.883693	0.529136	0.947046
ALPK1	101.785	42.6035	1103.13	1005.67	0.418563	0.911647	0.530498	0.977004
SRPX2	50.8926	21.3018	193.942	184.989	0.418563	0.953836	0.530498	1.02222
GRID1	48.1417	20.1806	2229.65	2101.03	0.419192	0.942313	0.531296	1.00987
STAMBPL1	85.2795	35.8766	1488.27	1464.22	0.420695	0.98384	0.533201	1.05437
IKBIP	74.2757	31.3921	409.892	366.615	0.422642	0.894417	0.535669	0.958539
DDX20	111.414	47.0881	284.724	292.619	0.422642	1.02773	0.535669	1.10141
ZNF613	105.912	44.8458	364.501	346.434	0.423426	0.950433	0.536663	1.01857
GSAP	97.6588	41.4824	466.287	485.456	0.424768	1.04111	0.538364	1.11575
RPTOR	129.295	54.9361	8947.47	8706.81	0.42489	0.973103	0.538518	1.04287
CLCN6	118.291	50.4515	2477.23	2268.08	0.426504	0.915569	0.540563	0.981206
FBXO31	154.053	66.1476	1774.36	1635.75	0.429381	0.92188	0.54421	0.98797
NKAIN4	75.6512	32.5132	182.938	150.233	0.429778	0.821224	0.544713	0.880099
SLC4A11	49.5172	21.3018	85.2795	78.4802	0.43019	0.92027	0.545235	0.986244
ZNF260	46.7662	20.1806	433.275	352.04	0.431521	0.812508	0.546923	0.870758
AC068946.1	67.3983	29.1498	1635.44	1530.36	0.4325	0.935749	0.548163	1.00283
NDUFB7	136.172	59.4207	248.961	198.443	0.436364	0.797083	0.553061	0.854226
CHD9	77.0267	33.6344	6240.54	5704.39	0.436659	0.914086	0.553434	0.979617
ALG9	77.0267	33.6344	1625.81	1519.15	0.436659	0.934395	0.553434	1.00138
HEXIM2	56.3945	24.6652	397.513	274.681	0.437369	0.690998	0.554333	0.740536
APIP	101.785	44.8458	876.179	803.861	0.440592	0.917463	0.558419	0.983236
AP001273.2	99.0343	43.7247	1834.89	1683.96	0.44151	0.917747	0.559583	0.983541
C11orf54	99.0343	43.7247	375.505	356.524	0.44151	0.949452	0.559583	1.01752
ZNF221	48.1417	21.3018	178.812	128.932	0.442481	0.721046	0.560813	0.772739
GHDC	93.5324	41.4824	121.042	113.236	0.443508	0.935508	0.562115	1.00258
MED24	123.793	54.9361	910.565	907.007	0.443774	0.996092	0.562452	1.0675
ZFP91	148.551	66.1476	1782.62	1711.99	0.445284	0.960379	0.564366	1.02923
ZFP91-CNTF	148.551	66.1476	1920.17	1862.22	0.445284	0.969824	0.564366	1.03935
SPOPL	100.41	44.8458	962.834	780.317	0.446628	0.810438	0.566069	0.868539
GREM2	85.2795	38.1189	729.003	755.652	0.446988	1.03656	0.566526	1.11087
C18orf21	199.444	89.6916	211.823	181.626	0.449708	0.857439	0.569973	0.918909
RNPC3	79.7776	35.8766	563.945	523.575	0.449708	0.928414	0.569973	0.994973
ZNF641	92.1569	41.4824	370.003	281.407	0.450128	0.760554	0.570505	0.815079
MKRN3	52.2681	23.5441	430.524	378.947	0.450448	0.880199	0.57091	0.943302
E2F2	52.2681	23.5441	173.31	199.564	0.450448	1.15148	0.57091	1.23404
TTC31	64.6474	29.1498	218.701	236.562	0.450904	1.08167	0.571489	1.15921
ATOH8	49.5172	22.4229	237.957	207.412	0.452831	0.871634	0.573931	0.934123
CPNE4	264.091	119.963	243.459	187.231	0.454246	0.769045	0.575725	0.824179
DARS2	130.67	59.4207	430.524	371.099	0.454738	0.86197	0.576348	0.923766
PRPF40B	81.1531	36.9978	436.026	420.429	0.455901	0.96423	0.577822	1.03336
UNK	103.161	47.0881	1224.17	1093.12	0.456454	0.892942	0.578523	0.956958
ZNF628	78.4022	35.8766	243.459	179.383	0.457598	0.73681	0.579972	0.789632
TP53TG5	66.0229	30.2709	92.1569	71.7533	0.458491	0.778599	0.581105	0.834417
ATF6	170.559	78.4802	3950.37	3401.55	0.460135	0.861073	0.583188	0.922804
ANXA1	189.816	87.4493	1162.28	964.185	0.460706	0.829565	0.583913	0.889037
CEP41	72.9003	33.6344	521.306	479.85	0.461375	0.920478	0.58476	0.986467
ZNF391	114.165	52.6938	110.038	110.993	0.46156	1.00868	0.584995	1.08099
ZNF19	79.7776	36.9978	349.371	275.802	0.463761	0.789424	0.587785	0.846018
AC010547.4	79.7776	36.9978	1016.48	871.13	0.463761	0.857009	0.587785	0.918448
PFAS	134.797	62.7841	436.026	375.584	0.465769	0.861379	0.590329	0.923132
KDM5A	134.797	62.7841	3125.08	3029.33	0.465769	0.969361	0.590329	1.03886
ZNF528	154.053	71.7533	569.447	486.577	0.465769	0.854473	0.590329	0.91573
PKIG	74.2757	34.7555	1020.6	1013.52	0.467925	0.993055	0.593062	1.06425
IGBP1	64.6474	30.2709	551.566	524.696	0.468247	0.951284	0.593469	1.01948
ZMYND12	55.0191	25.7863	66.0229	63.9053	0.46868	0.967926	0.594019	1.03732
AKNA	81.1531	38.1189	2830.73	2610.03	0.469716	0.922033	0.595332	0.988134
TFCP2	81.1531	38.1189	1242.06	1214.2	0.469716	0.977574	0.595332	1.04766
FAM167A	71.5248	33.6344	715.248	750.046	0.470248	1.04865	0.596005	1.12383
SH3GL2	104.536	49.3304	398.888	395.764	0.471898	0.992168	0.598097	1.0633
RELA	242.084	114.357	932.573	849.828	0.472385	0.911272	0.598714	0.976602
NDUFS2	189.816	89.6916	540.562	418.187	0.472519	0.773615	0.598885	0.829076
ZNF540	42.6398	20.1806	88.0305	50.4515	0.473282	0.573114	0.599851	0.614201
TFPI2	42.6398	20.1806	89.406	53.815	0.473282	0.601917	0.599851	0.645069
FAM114A2	255.839	121.084	507.551	461.912	0.473282	0.91008	0.599851	0.975324
OSCAR	101.785	48.2092	118.291	81.8436	0.473637	0.691884	0.600301	0.741485
EBF1	101.785	48.2092	1851.39	1790.47	0.473637	0.967094	0.600301	1.03643
SERPING1	59.1455	28.0286	342.494	287.013	0.473893	0.83801	0.600626	0.898088
ZNF454	66.0229	31.3921	147.176	134.537	0.475473	0.914126	0.602628	0.979661
CHD6	66.0229	31.3921	4133.31	4075.36	0.475473	0.985981	0.602628	1.05667
ECM1	99.0343	47.0881	151.302	123.326	0.475473	0.815096	0.602628	0.873531
PRKCH	82.5286	39.2401	1090.75	959.7	0.475473	0.879851	0.602628	0.942929
TMEM220	49.5172	23.5441	502.049	460.791	0.475473	0.91782	0.602628	0.98362
IQCG	82.5286	39.2401	577.7	542.634	0.475473	0.939301	0.602628	1.00664
THSD4	115.54	54.9361	5229.56	5749.23	0.475473	1.09937	0.602628	1.17819
TGDS	145.801	69.511	455.283	399.128	0.476754	0.876659	0.604252	0.939507
MMACHC	72.9003	34.7555	222.827	219.744	0.476754	0.986165	0.604252	1.05686
HAUS4	56.3945	26.9075	141.674	105.388	0.477129	0.743874	0.604727	0.797203
PRDM1	56.3945	26.9075	965.585	833.011	0.477129	0.862701	0.604727	0.924549
NUP107	79.7776	38.1189	789.524	734.35	0.477815	0.930118	0.605596	0.996799
MMP1	63.2719	30.2709	349.371	261.227	0.478426	0.747706	0.606371	0.80131
ABT1	189.816	90.8128	258.59	219.744	0.478426	0.849781	0.606371	0.910702
ZNF12	236.582	113.236	697.367	644.659	0.478632	0.924418	0.606632	0.990691
AP5S1	116.916	56.0573	530.934	468.639	0.479468	0.882669	0.607692	0.945948
TMEM186	163.682	78.4802	543.313	491.062	0.479468	0.903828	0.607692	0.968624
NRDE2	70.1493	33.6344	928.447	932.793	0.479468	1.00468	0.607692	1.07671
NUP35	77.0267	36.9978	475.915	439.489	0.480324	0.923461	0.608777	0.989665
ZNF74	184.314	88.5705	294.352	213.018	0.480542	0.723683	0.609052	0.775565
AC012309.1	83.9041	40.3612	1169.16	1009.03	0.48104	0.863043	0.609684	0.924915
ZNF839	342.494	164.808	719.374	682.777	0.481201	0.949127	0.609888	1.01717
ZNF827	44.0152	21.3018	1506.15	1429.46	0.483963	0.949084	0.613389	1.01712
ZBTB8OS	94.9079	45.967	1741.35	1403.67	0.484332	0.806082	0.613857	0.863871
GGA1	94.9079	45.967	1298.45	1133.48	0.484332	0.872947	0.613857	0.935529
TBX5	64.6474	31.3921	1609.31	1513.55	0.485589	0.940495	0.61545	1.00792
TRIM56	207.697	100.903	1273.69	1164.87	0.485819	0.914562	0.615741	0.980128
MAGED2	71.5248	34.7555	426.398	297.104	0.485923	0.696776	0.615872	0.746728
FGD1	71.5248	34.7555	675.359	590.844	0.485923	0.874859	0.615872	0.937578
CUX1	71.5248	34.7555	7371.18	7213.45	0.485923	0.978602	0.615872	1.04876
CD83	78.4022	38.1189	67.3983	58.2996	0.486198	0.865	0.616221	0.927012
HMBOX1	163.682	79.6013	2645.04	2407.1	0.486318	0.910042	0.616373	0.975284
SLC47A1	170.559	82.9648	493.796	395.764	0.486428	0.801473	0.616513	0.858931
RICTOR	273.72	133.416	3166.35	2953.1	0.487419	0.932651	0.617769	0.999513
YEATS4	195.318	95.2974	433.275	392.401	0.48791	0.905662	0.618391	0.97059
MRPS28	75.6512	36.9978	1178.78	1080.78	0.489058	0.916864	0.619846	0.982595
ELOVL6	82.5286	40.3612	1464.88	1214.2	0.489058	0.828872	0.619846	0.888295
RCC2	221.452	108.751	1949.05	1814.01	0.491083	0.930716	0.622412	0.99744
ATP5PB	138.923	68.3899	480.041	364.372	0.492286	0.759043	0.623937	0.81346
TTC28	132.046	65.0264	7885.61	7510.55	0.492454	0.952438	0.62415	1.02072
PTPRJ	66.0229	32.5132	1767.49	1713.11	0.492454	0.969235	0.62415	1.03872
PCGF1	125.168	61.663	317.735	237.683	0.49264	0.748053	0.624387	0.801682
HOXD11	59.1455	29.1498	218.701	172.656	0.492849	0.789464	0.624651	0.846061
PSMB4	118.291	58.2996	229.705	184.989	0.492849	0.805334	0.624651	0.863069
ZFHX3	45.3907	22.4229	6013.58	5581.06	0.493998	0.928076	0.626107	0.99461
MB	83.9041	41.4824	217.325	192.837	0.494402	0.88732	0.62662	0.950932
PAN3	160.931	79.6013	3250.25	2914.98	0.494631	0.896847	0.626909	0.961143
MYC	77.0267	38.1189	2313.55	2160.45	0.49488	0.933823	0.627225	1.00077
SMIM30	70.1493	34.7555	78.4022	59.4207	0.49545	0.757896	0.627948	0.81223
ZNF667	101.785	50.4515	708.37	602.055	0.495666	0.849916	0.628222	0.910847
AC005261.1	101.785	50.4515	225.578	230.956	0.495666	1.02384	0.628222	1.09724
C17orf100	63.2719	31.3921	130.67	109.872	0.496145	0.840836	0.628829	0.901116
SAMD9L	63.2719	31.3921	724.876	644.659	0.496145	0.889336	0.628829	0.953093
PCED1A	88.0305	43.7247	240.708	248.894	0.496699	1.03401	0.629531	1.10814
TMEM246	105.912	52.6938	425.022	335.222	0.497526	0.788717	0.630579	0.845261
TRANK1	130.67	65.0264	1786.74	1753.47	0.497638	0.981378	0.63072	1.05173
SLC26A11	74.2757	36.9978	867.926	702.958	0.498114	0.809929	0.631324	0.867993
SLC9A5	49.5172	24.6652	233.831	226.471	0.498114	0.968526	0.631324	1.03796
PHKA2	49.5172	24.6652	539.187	543.755	0.498114	1.00847	0.631324	1.08077
PRMT6	233.831	116.599	324.612	278.044	0.498647	0.856541	0.631999	0.917948
ITFG2	92.1569	45.967	972.462	1023.61	0.49879	1.05259	0.632181	1.12805
SZRD1	202.195	100.903	1053.62	921.581	0.499038	0.874685	0.632496	0.937392
DDR2	110.038	54.9361	5885.66	5671.87	0.499246	0.963676	0.632759	1.03276
PPIG	78.4022	39.2401	1280.57	1273.62	0.500498	0.994575	0.634345	1.06588
SLU7	149.927	75.1167	423.647	412.581	0.501022	0.973881	0.63501	1.0437
PDCD2L	185.689	93.0551	198.069	168.172	0.501133	0.849058	0.63515	0.909928
ZNF85	89.406	44.8458	390.635	359.888	0.501597	0.921288	0.635739	0.987336
RNASEL	71.5248	35.8766	119.666	104.267	0.501597	0.871309	0.635739	0.933774
NAGK	82.5286	41.4824	799.152	709.685	0.502642	0.888048	0.637064	0.951713
KBTBD4	129.295	65.0264	226.954	233.198	0.502932	1.02751	0.63743	1.10118
CCDC86	111.414	56.0573	207.697	195.079	0.503146	0.93925	0.637701	1.00659
ATP23	93.5324	47.0881	281.973	243.289	0.503442	0.862809	0.638076	0.924664
S100A2	93.5324	47.0881	86.655	84.0859	0.503442	0.970352	0.638076	1.03992
ZNF419	169.184	85.207	448.405	362.13	0.503637	0.807595	0.638323	0.865492
AC003005.1	169.184	85.207	1596.93	1391.34	0.503637	0.871261	0.638323	0.933722
NR4A1	122.417	61.663	1775.74	1625.66	0.503711	0.915483	0.638418	0.981115
ZNF155	75.6512	38.1189	334.241	274.681	0.503877	0.821805	0.638629	0.88072
MND1	75.6512	38.1189	301.229	264.59	0.503877	0.878368	0.638629	0.941339
NUDT9	86.655	43.7247	645.098	553.846	0.504583	0.858545	0.639523	0.920094
IPO11	115.54	58.2996	2444.22	2261.35	0.504583	0.925182	0.639523	0.991509
ESCO1	173.31	87.4493	1160.9	1117.78	0.504583	0.962856	0.639523	1.03188
ITFG1	270.969	136.78	2603.78	2520.33	0.50478	0.967953	0.639773	1.03735
CDK9	79.7776	40.3612	744.133	605.418	0.505922	0.813589	0.64122	0.871916
COPS7B	79.7776	40.3612	581.827	523.575	0.505922	0.899881	0.64122	0.964394
SNX13	341.118	172.656	2738.57	2427.28	0.506148	0.88633	0.641507	0.949871
OXSM	203.571	103.145	152.678	109.872	0.506681	0.719634	0.642182	0.771225
LSG1	185.689	94.1762	850.044	766.863	0.507171	0.902145	0.642803	0.96682
METTL14	145.801	73.9956	653.351	561.694	0.507513	0.859712	0.643236	0.921345
POT1	83.9041	42.6035	839.041	804.982	0.507765	0.959408	0.643556	1.02819
SYNJ2BP	94.9079	48.2092	555.693	495.546	0.507958	0.891763	0.643801	0.955695
SYNJ2BP-COX16	94.9079	48.2092	1474.51	1364.43	0.507958	0.925347	0.643801	0.991686
TRAF3IP1	116.916	59.4207	869.301	883.463	0.508236	1.01629	0.644153	1.08915
PRCC	154.053	78.4802	1056.37	1029.21	0.509435	0.974294	0.645672	1.04414
TSNARE1	77.0267	39.2401	2357.57	2405.98	0.509435	1.02053	0.645672	1.0937
JRK	136.172	69.511	309.482	339.707	0.510464	1.09766	0.646977	1.17635
ZDBF2	125.168	63.9053	493.796	458.548	0.510555	0.928619	0.647092	0.995192
ZNF354C	114.165	58.2996	398.888	382.311	0.510663	0.95844	0.647228	1.02715
ANTXR1	114.165	58.2996	3204.86	3290.56	0.510663	1.02674	0.647228	1.10035
HMGB3	103.161	52.6938	364.501	325.132	0.510793	0.891992	0.647394	0.955939
ZFAND2B	92.1569	47.0881	75.6512	76.2379	0.510956	1.00775	0.6476	1.08
SLC27A6	70.1493	35.8766	459.409	356.524	0.511433	0.776049	0.648205	0.831685
TCTN1	70.1493	35.8766	291.601	288.134	0.511433	0.988112	0.648205	1.05895
CASP8	59.1455	30.2709	294.352	223.108	0.511804	0.757963	0.648676	0.812302
DUS2	118.291	60.5418	810.156	747.804	0.511804	0.923037	0.648676	0.989211
MDFIC	59.1455	30.2709	1291.57	1217.56	0.511804	0.942699	0.648676	1.01028
EBNA1BP2	48.1417	24.6652	418.145	362.13	0.512346	0.866039	0.649362	0.928126
ZNF524	74.2757	38.1189	381.007	347.555	0.513209	0.912201	0.650455	0.977598
TMEM43	111.414	57.1784	1405.74	1301.65	0.513209	0.925955	0.650455	0.992338
ZNF335	111.414	57.1784	940.826	975.396	0.513209	1.03674	0.650455	1.11107
MBNL2	100.41	51.5727	2849.99	2805.11	0.513622	0.984252	0.650979	1.05481
SPC24	63.2719	32.5132	804.654	656.991	0.513865	0.816489	0.651287	0.875024
TAFA2	126.544	65.0264	339.743	300.467	0.513865	0.884396	0.651287	0.947799
NOB1	152.678	78.4802	502.049	452.943	0.514024	0.902188	0.651489	0.966867
DNAJC14	141.674	72.8744	398.888	332.98	0.514381	0.834771	0.651941	0.894616
DHX30	52.2681	26.9075	2478.61	2317.41	0.514797	0.934963	0.652469	1.00199
BBS5	52.2681	26.9075	258.59	243.289	0.514797	0.940829	0.652469	1.00828
AC093899.2	52.2681	26.9075	368.628	348.676	0.514797	0.945876	0.652469	1.01369
GPI	52.2681	26.9075	1474.51	1417.13	0.514797	0.961083	0.652469	1.02998
HSPBP1	93.5324	48.2092	221.452	220.866	0.515428	0.997353	0.653269	1.06885
STPG2	134.797	69.511	309.482	244.41	0.515673	0.789737	0.653579	0.846354
ZNF330	202.195	104.267	522.681	413.703	0.515673	0.791501	0.653579	0.848244
USP32	202.195	104.267	5206.18	4713.29	0.515673	0.905327	0.653579	0.970231
TMEM94	108.663	56.0573	577.7	500.031	0.515884	0.865554	0.653846	0.927606
MSANTD3	82.5286	42.6035	1191.16	1025.85	0.516227	0.861216	0.654281	0.922957
SDSL	82.5286	42.6035	209.072	200.685	0.516227	0.959883	0.654281	1.0287
DIS3	221.452	114.357	1045.36	1013.52	0.516396	0.969535	0.654495	1.03904
TXNDC15	180.187	93.0551	495.172	423.793	0.516435	0.855851	0.654544	0.917207
ABCA5	97.6588	50.4515	444.279	435.004	0.51661	0.979125	0.654766	1.04932
EIF2A	112.789	58.2996	954.581	827.405	0.51689	0.866773	0.655121	0.928913
SUCLG1	112.789	58.2996	764.765	677.172	0.51689	0.885464	0.655121	0.948943
PRDM5	86.655	44.8458	1361.72	1245.59	0.517521	0.914719	0.655921	0.980296
C12orf60	188.44	97.5396	220.076	171.535	0.517616	0.779435	0.656041	0.835314
NUSAP1	116.916	60.5418	744.133	738.835	0.517826	0.99288	0.656307	1.06406
TRABD2A	75.6512	39.2401	330.114	293.74	0.518697	0.889813	0.657412	0.953604
CDKN2A	75.6512	39.2401	737.255	667.081	0.518697	0.904817	0.657412	0.969684
DPH6	121.042	62.7841	1144.4	1088.63	0.518697	0.951272	0.657412	1.01947
BIVM	110.038	57.1784	738.631	650.264	0.519624	0.880364	0.658586	0.943478
POLK	110.038	57.1784	1321.83	1169.35	0.519624	0.884646	0.658586	0.948067
BIVM-ERCC5	110.038	57.1784	2096.23	1891.37	0.519624	0.902275	0.658586	0.96696
PWWP2B	110.038	57.1784	497.922	534.786	0.519624	1.07404	0.658586	1.15103
SNAP23	94.9079	49.3304	1185.66	912.612	0.519771	0.769708	0.658773	0.824889
CAMK2D	334.241	173.778	8133.19	7627.15	0.519917	0.937781	0.658958	1.00501
CSTF2	64.6474	33.6344	174.686	139.022	0.520274	0.795842	0.65941	0.852896
ZNF784	228.329	118.841	68.7738	53.815	0.520483	0.782492	0.659675	0.83859
RGS5	163.682	85.207	602.459	549.361	0.520565	0.911865	0.65978	0.977238
CCDC77	167.808	87.4493	496.547	440.61	0.521127	0.887348	0.660491	0.950963
EXOC7	305.356	159.203	1297.07	1181.69	0.521368	0.91104	0.660796	0.976354
PRPF19	187.065	97.5396	834.914	730.987	0.521422	0.875523	0.660865	0.93829
PNKD	107.287	56.0573	752.386	655.87	0.522497	0.871721	0.662228	0.934215
ZNF22	160.931	84.0859	397.513	357.645	0.522497	0.899708	0.662228	0.964209
C12orf43	107.287	56.0573	422.271	389.037	0.522497	0.921297	0.662228	0.987346
RNLS	53.6436	28.0286	649.225	683.899	0.522497	1.05341	0.662228	1.12893
TEX9	57.77	30.2709	343.869	272.438	0.52399	0.792273	0.66412	0.849072
NKAP	96.2834	50.4515	331.49	281.407	0.52399	0.848917	0.66412	0.909777
MBIP	96.2834	50.4515	397.513	365.493	0.52399	0.919451	0.66412	0.985367
ODR4	154.053	80.7225	768.891	678.293	0.52399	0.88217	0.66412	0.945413
BABAM1	134.797	70.6322	433.275	405.855	0.52399	0.936713	0.66412	1.00387
AC010463.1	134.797	70.6322	533.685	519.09	0.52399	0.972653	0.66412	1.04238
DVL1	158.18	82.9648	532.309	483.214	0.524497	0.907768	0.664762	0.972847
ZNF138	138.923	72.8744	480.041	439.489	0.524567	0.915523	0.664851	0.981158
SHKBP1	119.666	62.7841	292.976	303.83	0.524659	1.03705	0.664968	1.11139
ZNF350	81.1531	42.6035	442.903	395.764	0.524977	0.893568	0.665371	0.957628
ZNF311	147.176	77.359	160.931	164.808	0.525623	1.02409	0.666189	1.09751
ZNF362	127.919	67.2687	1110.01	972.033	0.525868	0.875698	0.666501	0.938477
HSPA12B	66.0229	34.7555	295.727	238.804	0.526416	0.807514	0.667195	0.865405
HAUS5	89.406	47.0881	204.946	195.079	0.526677	0.951857	0.667526	1.0201
C19orf54	202.195	106.509	385.133	316.163	0.526763	0.820918	0.667634	0.87977
COPB2	202.195	106.509	1459.38	1285.95	0.526763	0.881164	0.667634	0.944335
MSRB3	112.789	59.4207	2742.7	2502.4	0.52683	0.912384	0.66772	0.977794
HMGN5	46.7662	24.6652	130.67	84.0859	0.527415	0.643497	0.668461	0.68963
TBKBP1	70.1493	36.9978	822.535	687.262	0.527415	0.835541	0.668461	0.895442
HTATIP2	140.299	73.9956	491.045	459.67	0.527415	0.936105	0.668461	1.00321
GTPBP4	191.191	100.903	1444.25	1345.37	0.52776	0.931538	0.668898	0.998321
TBCCD1	195.318	103.145	801.903	677.172	0.52809	0.844456	0.669317	0.904996
EVI5L	97.6588	51.5727	514.428	478.729	0.52809	0.930604	0.669317	0.99732
CENPN	97.6588	51.5727	303.98	291.498	0.52809	0.958936	0.669317	1.02768
AC018523.2	171.935	90.8128	1724.85	1498.97	0.528182	0.869046	0.669433	0.931348
SP2	74.2757	39.2401	905.064	742.198	0.528303	0.820051	0.669586	0.878841
NEPRO	148.551	78.4802	657.478	570.663	0.528303	0.867958	0.669586	0.930182
AC087289.1	199.444	105.388	248.961	287.013	0.528407	1.15284	0.669718	1.23549
CC2D1A	176.061	93.0551	682.236	642.416	0.528539	0.941633	0.669885	1.00914
AC008764.4	176.061	93.0551	2929.76	2761.38	0.528539	0.942526	0.669885	1.0101
SMIM7	176.061	93.0551	1004.1	978.76	0.528539	0.974765	0.669885	1.04465
COG2	203.571	107.63	907.814	847.586	0.528711	0.933655	0.670103	1.00059
NNMT	152.678	80.7225	907.814	809.467	0.528711	0.891666	0.670103	0.95559
ERGIC2	129.295	68.3899	866.55	701.837	0.528945	0.809921	0.6704	0.867985
MTERF4	129.295	68.3899	1097.63	1003.43	0.528945	0.914174	0.6704	0.979712
STMN3	78.4022	41.4824	266.842	216.381	0.529097	0.810894	0.670593	0.869028
ZEB2	55.0191	29.1498	3387.8	3178.45	0.529812	0.938204	0.671499	1.00546
AHI1	137.548	72.8744	2339.69	2195.2	0.529812	0.938247	0.671499	1.00551
MAPK3	82.5286	43.7247	225.578	221.987	0.529812	0.984079	0.671499	1.05463
TP53RK	350.747	186.11	286.099	310.557	0.530611	1.08549	0.672512	1.16331
LARP4B	209.072	110.993	5570.68	5188.66	0.530885	0.931423	0.672859	0.998198
ING3	90.7814	48.2092	426.398	417.066	0.531047	0.978115	0.673065	1.04824
SLC22A15	122.417	65.0264	3068.69	2724.38	0.531186	0.887801	0.673241	0.951448
SLC25A46	225.578	119.963	645.098	565.057	0.5318	0.875924	0.674019	0.93872
ZNF24	225.578	119.963	763.389	723.139	0.5318	0.947274	0.674019	1.01518
TIMM17B	130.67	69.511	112.789	106.509	0.531957	0.944318	0.674218	1.01202
CCDC163	67.3983	35.8766	103.161	89.6916	0.532308	0.869436	0.674662	0.931766
TMC7	67.3983	35.8766	584.578	576.269	0.532308	0.985787	0.674662	1.05646
ZNF33A	103.161	54.9361	1273.69	1192.9	0.532529	0.936568	0.674943	1.00371
FOXN3	143.05	76.2379	5365.73	4974.52	0.532947	0.927091	0.675473	0.993554
HIGD2B	218.701	116.599	85.2795	73.9956	0.533145	0.867683	0.675723	0.929888
BACH2	75.6512	40.3612	1946.3	1950.79	0.533517	1.00231	0.676195	1.07417
METTL16	151.302	80.7225	1783.99	1819.62	0.533517	1.01997	0.676195	1.09309
ATP13A1	231.08	123.326	845.918	753.41	0.533694	0.890641	0.676419	0.954492
ZSWIM9	115.54	61.663	976.588	872.251	0.533694	0.893161	0.676419	0.957193
ZNF546	83.9041	44.8458	543.313	497.789	0.534489	0.916209	0.677427	0.981893
C2	44.0152	23.5441	1097.63	1055	0.534907	0.961159	0.677956	1.03007
SENP1	92.1569	49.3304	1103.13	942.883	0.535287	0.854733	0.678438	0.916009
TTC9C	192.567	103.145	414.018	368.857	0.535634	0.890919	0.678879	0.954789
HEATR3	196.693	105.388	729.003	634.568	0.535797	0.870461	0.679085	0.932865
ABCA3	100.41	53.815	403.015	346.434	0.535953	0.859606	0.679283	0.921232
ACCS	100.41	53.815	310.858	302.709	0.535953	0.973787	0.679283	1.0436
COMMD10	100.41	53.815	2339.69	2319.65	0.535953	0.991436	0.679283	1.06251
RTF2	104.536	56.0573	972.462	904.764	0.536247	0.930385	0.679655	0.997085
ZNF644	165.057	88.5705	2786.72	2539.39	0.536605	0.91125	0.680108	0.976578
AMN1	56.3945	30.2709	414.018	401.37	0.53677	0.96945	0.680318	1.03895
KCNJ12	56.3945	30.2709	222.827	236.562	0.53677	1.06164	0.680318	1.13775
LRRC40	121.042	65.0264	565.321	529.181	0.537222	0.936071	0.680891	1.00318
ZNF227	193.942	104.267	642.348	537.029	0.537616	0.836041	0.681391	0.895977
HCFC1	64.6474	34.7555	907.814	954.095	0.537616	1.05098	0.681391	1.12633
KRBA1	68.7738	36.9978	324.612	324.011	0.537963	0.998147	0.68183	1.06971
PHOSPHO2	206.321	110.993	127.919	105.388	0.537963	0.82386	0.68183	0.882924
KLHL23	206.321	110.993	775.769	702.958	0.537963	0.906144	0.68183	0.971106
ZBTB3	72.9003	39.2401	138.923	132.295	0.538271	0.95229	0.68222	1.02056
THRA	77.0267	41.4824	590.079	488.819	0.538546	0.828396	0.682568	0.887784
SHLD1	77.0267	41.4824	497.922	426.035	0.538546	0.855626	0.682568	0.916966
ZSCAN21	239.333	128.932	409.892	324.011	0.538713	0.790479	0.68278	0.847149
FAM192A	89.406	48.2092	872.052	849.828	0.539217	0.974515	0.68342	1.04438
C16orf87	93.5324	50.4515	398.888	380.068	0.539402	0.952819	0.683653	1.02113
GAR1	97.6588	52.6938	242.084	209.654	0.539571	0.866039	0.683867	0.928126
LCLAT1	101.785	54.9361	1900.91	1830.83	0.539726	0.963134	0.684064	1.03218
EPB41	110.038	59.4207	2169.13	1895.86	0.540001	0.874019	0.684413	0.936678
ZSCAN12	114.165	61.663	716.623	687.262	0.540124	0.959028	0.684568	1.02778
TIMM21	147.176	79.6013	451.156	341.949	0.540858	0.75794	0.685499	0.812277
MRPL27	147.176	79.6013	261.341	220.866	0.540858	0.845126	0.685499	0.905713
PSMB6	151.302	81.8436	71.5248	81.8436	0.540927	1.14427	0.685587	1.2263
FAM98B	159.555	86.3282	414.018	431.641	0.541055	1.04256	0.685749	1.11731
EDEM2	167.808	90.8128	631.344	623.357	0.54117	0.987349	0.685895	1.05813
RXRA	180.187	97.5396	2137.49	2094.3	0.541323	0.979794	0.686089	1.05004
ZNF3	209.072	113.236	1204.92	1151.42	0.54161	0.955598	0.686452	1.02411
TRUB1	213.199	115.478	902.313	674.929	0.541644	0.748	0.686496	0.801624
C14orf93	94.9079	51.5727	546.064	458.548	0.543397	0.839734	0.688717	0.899935
MBLAC1	144.425	78.4802	198.069	155.839	0.543397	0.786794	0.688717	0.8432
DCTN4	136.172	73.9956	1191.16	964.185	0.543397	0.809449	0.688717	0.867479
MYLPF	86.655	47.0881	290.226	245.531	0.543397	0.846	0.688717	0.90665
GPS1	115.54	62.7841	390.635	335.222	0.543397	0.858147	0.688717	0.919668
ZNF334	119.666	65.0264	382.382	349.797	0.543397	0.914784	0.688717	0.980365
TUBGCP3	173.31	94.1762	1561.17	1431.7	0.543397	0.917073	0.688717	0.982818
OAS2	156.804	85.207	1508.9	1414.89	0.543397	0.937695	0.688717	1.00492
MET	107.287	58.2996	2209.02	2098.78	0.543397	0.950099	0.688717	1.01821
DELE1	156.804	85.207	568.072	548.24	0.543397	0.965089	0.688717	1.03428
ZNF678	57.77	31.3921	1119.64	1095.36	0.543397	0.978315	0.688717	1.04845
UTP15	99.0343	53.815	303.98	300.467	0.543397	0.988442	0.688717	1.0593
NEURL4	99.0343	53.815	496.547	521.333	0.543397	1.04992	0.688717	1.12519
BBOF1	45.3907	24.6652	261.341	174.899	0.543397	0.669237	0.688717	0.717215
CTU1	140.299	76.2379	441.528	355.403	0.543397	0.804939	0.688717	0.862646
GRIK2	45.3907	24.6652	687.738	584.117	0.543397	0.84933	0.688717	0.910219
GRK4	45.3907	24.6652	313.609	289.255	0.543397	0.922345	0.688717	0.988469
RBMS1	148.551	80.7225	6973.67	6512.73	0.543397	0.933904	0.688717	1.00086
FBXO6	70.1493	38.1189	231.08	221.987	0.543397	0.960649	0.688717	1.02952
EHBP1	178.812	97.5396	4313.49	4143.75	0.545487	0.960649	0.691366	1.02952
THADA	170.559	93.0551	3523.97	3511.43	0.545588	0.99644	0.691494	1.06788
PEX14	258.59	141.264	2353.44	2044.97	0.546288	0.868928	0.692381	0.931222
MLPH	116.916	63.9053	1358.97	1236.62	0.546594	0.90997	0.692769	0.975207
RER1	325.988	178.262	1107.26	963.064	0.546837	0.869773	0.693076	0.932128
UBE2D3	100.41	54.9361	4321.75	3494.61	0.547119	0.80861	0.693435	0.86658
RSL24D1	176.061	96.4185	1075.62	849.828	0.547643	0.79008	0.694098	0.846722
KIF3A	88.0305	48.2092	371.379	340.828	0.547643	0.917738	0.694098	0.983531
ARL16	83.9041	45.967	231.08	195.079	0.547851	0.844206	0.694363	0.904728
SUPT6H	163.682	89.6916	2303.92	2130.18	0.547964	0.924586	0.694505	0.990871
PLD1	79.7776	43.7247	1323.21	1170.48	0.548082	0.884574	0.694655	0.94799
RABGGTA	143.05	78.4802	174.686	131.174	0.548622	0.750915	0.69534	0.804749
SUDS3	138.923	76.2379	1151.27	1044.91	0.548777	0.90761	0.695536	0.972677
TADA3	130.67	71.7533	537.811	475.366	0.549117	0.883889	0.695967	0.947256
CUL2	126.544	69.511	1757.86	1531.48	0.549304	0.871221	0.696203	0.93368
CALD1	126.544	69.511	3255.75	3125.75	0.549304	0.960071	0.696203	1.0289
VPS54	181.563	99.7819	2217.27	2027.03	0.549572	0.914202	0.696544	0.979742
TDRD7	181.563	99.7819	1541.91	1507.94	0.549572	0.97797	0.696544	1.04808
STARD4	169.184	93.0551	330.114	270.196	0.550024	0.818492	0.697116	0.87717
KCTD2	393.386	216.381	883.056	755.652	0.550047	0.855724	0.697146	0.917071
ID1	279.222	153.597	144.425	119.963	0.550089	0.830622	0.697199	0.890169
CD302	55.0191	30.2709	265.467	220.866	0.55019	0.831989	0.697326	0.891635
MRPL47	101.785	56.0573	420.896	353.161	0.55074	0.839069	0.698024	0.899223
CDC42BPA	140.299	77.359	10958.4	9635.12	0.551388	0.879244	0.698846	0.942277
TOP3B	327.363	180.504	1217.3	1167.11	0.551388	0.958774	0.698846	1.02751
ZSCAN16	89.406	49.3304	108.663	69.511	0.551757	0.639696	0.699313	0.685556
HEATR6	89.406	49.3304	558.443	478.729	0.551757	0.857256	0.699313	0.918713
NRL	85.2795	47.0881	517.179	386.795	0.552162	0.747894	0.699826	0.801511
SMG8	166.433	91.9339	224.203	193.958	0.552379	0.865102	0.700101	0.927122
CALR3	123.793	68.3899	57.77	62.7841	0.552454	1.08679	0.700196	1.16471
N4BP2L2	158.18	87.4493	5413.88	5158.39	0.552848	0.952809	0.700695	1.02112
EVC2	235.206	130.053	2723.44	2678.42	0.552931	0.983467	0.7008	1.05397
L3MBTL1	77.0267	42.6035	795.025	701.837	0.553101	0.882786	0.701016	0.946073
STKLD1	226.954	125.568	279.222	238.804	0.553277	0.855248	0.701239	0.916562
ALKBH4	184.314	102.024	141.674	121.084	0.553535	0.854664	0.701567	0.915935
SH2D5	145.801	80.7225	496.547	431.641	0.55365	0.869285	0.701712	0.931605
NUPL2	145.801	80.7225	548.815	534.786	0.55365	0.974438	0.701712	1.0443
CERS6	180.187	99.7819	2376.82	2232.2	0.553767	0.939153	0.701861	1.00648
YIPF5	141.674	78.4802	447.03	419.308	0.553949	0.937987	0.70209	1.00523
SCAND1	244.835	135.659	138.923	140.143	0.554082	1.00878	0.70226	1.0811
FAM76B	171.935	95.2974	616.213	593.086	0.554265	0.962468	0.702492	1.03147
SLC22A18	99.0343	54.9361	510.302	455.185	0.554718	0.891992	0.703066	0.955939
DERL1	193.942	107.63	723.501	664.839	0.554959	0.91892	0.703371	0.984798
GABARAPL2	129.295	71.7533	451.156	433.883	0.554959	0.961714	0.703371	1.03066
CAPZA1	254.463	141.264	1814.25	1605.48	0.555146	0.884926	0.703609	0.948367
BCL2L13	155.429	86.3282	3100.32	2708.69	0.555419	0.873679	0.703954	0.936313
KRIT1	155.429	86.3282	988.968	881.22	0.555419	0.891051	0.703954	0.954931
DPP9	310.858	172.656	2319.05	2104.39	0.555419	0.907435	0.703954	0.972489
AC000120.3	155.429	86.3282	2002.69	1826.35	0.555419	0.911945	0.703954	0.977323
ARSJ	90.7814	50.4515	944.952	846.465	0.555747	0.895775	0.70437	0.959994
COG6	90.7814	50.4515	922.945	856.555	0.555747	0.928067	0.70437	0.994601
APOBEC3G	181.563	100.903	342.494	341.949	0.555747	0.998411	0.70437	1.06999
SMO	90.7814	50.4515	123.793	140.143	0.555747	1.13208	0.70437	1.21324
HDAC2	207.697	115.478	1419.49	1329.68	0.555993	0.936728	0.704681	1.00388
RALA	177.436	98.6608	2869.24	2533.79	0.556034	0.883086	0.704734	0.946395
EMC4	116.916	65.0264	173.31	144.628	0.556183	0.834503	0.704922	0.894329
TCF19	86.655	48.2092	248.961	201.806	0.556335	0.810593	0.705115	0.868705
DUS3L	173.31	96.4185	299.854	256.742	0.556335	0.856225	0.705115	0.917608
PPIP5K2	86.655	48.2092	1028.86	912.612	0.556335	0.887016	0.705115	0.950607
RAD17	173.31	96.4185	793.65	766.863	0.556335	0.966249	0.705115	1.03552
MRPL55	143.05	79.6013	64.6474	68.3899	0.55646	1.05789	0.705273	1.13373
EIF2D	199.444	110.993	740.006	693.989	0.556514	0.937815	0.705342	1.00505
ARFRP1	138.923	77.359	753.761	766.863	0.556848	1.01738	0.705765	1.09032
ACKR3	138.923	77.359	275.095	289.255	0.556848	1.05147	0.705765	1.12685
ZKSCAN5	165.057	91.9339	786.773	665.96	0.556982	0.846446	0.705935	0.907128
TRMT10A	160.931	89.6916	181.563	160.324	0.557331	0.883021	0.706377	0.946325
MYL5	321.862	179.383	1264.06	1145.81	0.557331	0.906451	0.706377	0.971435
ARHGAP32	104.536	58.2996	2442.85	2183.99	0.557697	0.894035	0.706841	0.958129
TOX	78.4022	43.7247	1107.26	992.214	0.557697	0.896099	0.706841	0.960341
ZFP64	52.2681	29.1498	1442.87	1379.01	0.557697	0.955737	0.706841	1.02425
VTA1	156.804	87.4493	1391.98	1373.4	0.557697	0.986653	0.706841	1.05739
IMP4	152.678	85.207	246.21	210.775	0.558084	0.856078	0.707331	0.917451
MRTO4	126.544	70.6322	299.854	315.042	0.558164	1.05065	0.707432	1.12597
MASTL	100.41	56.0573	657.478	604.297	0.558285	0.919114	0.707586	0.985006
NGDN	96.2834	53.815	822.535	781.438	0.558923	0.950037	0.708395	1.01815
RAB5IF	288.85	161.445	272.344	263.469	0.558923	0.967412	0.708395	1.03677
PQBP1	118.291	66.1476	136.172	145.749	0.559194	1.07033	0.708738	1.14706
ZNF428	202.195	113.236	291.601	218.623	0.560032	0.749734	0.709801	0.803483
AC007998.2	66.0229	36.9978	412.643	394.643	0.560378	0.956379	0.71024	1.02494
INO80C	66.0229	36.9978	397.513	381.189	0.560378	0.958936	0.71024	1.02768
RING1	330.114	184.989	286.099	199.564	0.560378	0.697534	0.71024	0.747541
NFKBIL1	110.038	61.663	368.628	335.222	0.560378	0.909379	0.71024	0.974574
HNRNPR	198.069	110.993	2064.59	1890.25	0.560378	0.915557	0.71024	0.981194
ADAMTS10	88.0305	49.3304	1004.1	940.641	0.560378	0.936802	0.71024	1.00396
SCAMP5	83.9041	47.0881	358.999	294.861	0.561214	0.821342	0.711298	0.880224
FCF1	167.808	94.1762	434.651	365.493	0.561214	0.84089	0.711298	0.901174
SMARCAD1	167.808	94.1762	2035.71	1882.4	0.561214	0.924693	0.711298	0.990985
NIPAL3	83.9041	47.0881	843.167	780.317	0.561214	0.92546	0.711298	0.991807
DHFR2	145.801	81.8436	191.191	136.78	0.56134	0.715408	0.711458	0.766696
TFB2M	145.801	81.8436	639.597	579.632	0.56134	0.906246	0.711458	0.971216
SPA17	61.8964	34.7555	119.666	122.205	0.561511	1.02121	0.711675	1.09442
RUFY2	261.341	146.87	1496.52	1293.8	0.561987	0.864541	0.712279	0.926521
GTF3C3	159.555	89.6916	839.041	770.227	0.562135	0.917985	0.712466	0.983796
RABL3	39.8888	22.4229	356.248	334.101	0.562135	0.937832	0.712466	1.00507
COX7B	97.6588	54.9361	312.233	234.319	0.562531	0.750463	0.712968	0.804264
GLA	57.77	32.5132	123.793	105.388	0.562804	0.851322	0.713314	0.912354
ENKD1	57.77	32.5132	229.705	201.806	0.562804	0.878547	0.713314	0.94153
POU2F2	57.77	32.5132	949.079	910.37	0.562804	0.959214	0.713314	1.02798
ZNF502	115.54	65.0264	185.689	195.079	0.562804	1.05057	0.713314	1.12588
TMEM138	133.421	75.1167	243.459	232.077	0.563004	0.953248	0.713568	1.02159
PEX2	151.302	85.207	434.651	374.463	0.563157	0.861525	0.713762	0.923289
SUPT7L	151.302	85.207	438.777	405.855	0.563157	0.924968	0.713762	0.991279
RTN4IP1	151.302	85.207	346.62	334.101	0.563157	0.963883	0.713762	1.03298
RFX3	169.184	95.2974	2716.57	2456.43	0.563278	0.904241	0.713914	0.969066
ZWILCH	169.184	95.2974	455.283	473.123	0.563278	1.03919	0.713914	1.11369
ANG	449.781	253.379	790.899	577.39	0.563338	0.730042	0.713991	0.78238
NBPF11	187.065	105.388	1467.63	1382.37	0.563375	0.941906	0.714038	1.00943
TRAPPC2B	147.176	82.9648	70.1493	57.1784	0.563711	0.815096	0.714464	0.873531
ZNF547	147.176	82.9648	562.57	458.548	0.563711	0.815096	0.714464	0.873531
AC003002.1	147.176	82.9648	936.7	790.407	0.563711	0.843822	0.714464	0.904316
MTMR6	182.938	103.145	905.064	773.59	0.563826	0.854736	0.714609	0.916013
TCEANC2	160.931	90.8128	585.953	451.822	0.564297	0.771088	0.715206	0.826368
NDUFV1	125.168	70.6322	170.559	176.02	0.564297	1.03202	0.715206	1.106
PKIB	71.5248	40.3612	171.935	126.689	0.564297	0.736847	0.715206	0.789672
NUMA1	103.161	58.2996	2620.28	2446.34	0.565133	0.933616	0.716266	1.00055
FAM124A	85.2795	48.2092	328.739	308.315	0.565308	0.937872	0.716488	1.00511
NPRL2	255.839	144.628	81.1531	125.568	0.565308	1.5473	0.716488	1.65823
WDR87	67.3983	38.1189	86.655	63.9053	0.565577	0.737468	0.716828	0.790337
CRYM	134.797	76.2379	1524.03	1320.71	0.565577	0.866591	0.716828	0.928718
CADPS2	67.3983	38.1189	508.926	492.183	0.565577	0.9671	0.716828	1.03643
NRBP2	116.916	66.1476	177.436	147.991	0.565772	0.834052	0.717076	0.893845
XRCC5	233.831	132.295	5093.39	4835.5	0.565772	0.949368	0.717076	1.01743
BIN3	166.433	94.1762	1734.48	1601	0.565852	0.923043	0.717177	0.989216
AC091167.2	49.5172	28.0286	653.351	586.359	0.566039	0.897464	0.717414	0.961803
ZNRD1	148.551	84.0859	67.3983	57.1784	0.566039	0.848365	0.717414	0.909185
GNPAT	261.341	147.991	892.684	767.985	0.566277	0.860309	0.717716	0.921985
SEC23B	81.1531	45.967	1778.49	1577.45	0.566423	0.886961	0.7179	0.950547
DIS3L	112.789	63.9053	892.684	766.863	0.566591	0.859053	0.718114	0.92064
PATZ1	94.9079	53.815	563.945	531.423	0.567023	0.94233	0.718662	1.00989
RBM42	189.816	107.63	297.103	307.194	0.567023	1.03396	0.718662	1.10809
CARNMT1	158.18	89.6916	635.47	567.3	0.567023	0.892724	0.718662	0.956724
VPS41	158.18	89.6916	2975.16	2685.14	0.567023	0.902522	0.718662	0.967224
PHC2	63.2719	35.8766	4137.43	3864.59	0.567023	0.934054	0.718662	1.00102
ARHGEF1	298.478	169.293	1825.26	1689.57	0.567187	0.925659	0.718869	0.99202
SH3BP5L	77.0267	43.7247	667.106	603.176	0.567656	0.904168	0.719464	0.968989
ALG13	77.0267	43.7247	840.416	875.614	0.567656	1.04188	0.719464	1.11658
ABL2	122.417	69.511	3869.22	3557.39	0.56782	0.91941	0.719671	0.985323
ZC3H18	122.417	69.511	1617.56	1557.27	0.56782	0.962728	0.719671	1.03175
DYRK1A	90.7814	51.5727	7001.18	6381.56	0.568097	0.911498	0.720023	0.976844
ZNF740	136.172	77.359	1682.21	1653.69	0.568097	0.983047	0.720023	1.05352
CGRRF1	181.563	103.145	401.639	395.764	0.568097	0.985373	0.720023	1.05601
TMEM184C	317.735	180.504	691.865	588.601	0.568097	0.850746	0.720023	0.911737
MCOLN1	209.072	118.841	528.183	461.912	0.568422	0.87453	0.720435	0.937226
EXD2	59.1455	33.6344	562.57	447.337	0.568672	0.795167	0.720751	0.852173
EOGT	145.801	82.9648	584.578	581.874	0.569029	0.995376	0.721204	1.06674
RAB1A	187.065	106.509	3995.76	3774.9	0.569368	0.944726	0.721634	1.01245
PCIF1	301.229	171.535	620.34	571.784	0.569451	0.921727	0.721738	0.987806
PHF7	283.348	161.445	279.222	214.139	0.569776	0.766913	0.72215	0.821893
SPCS2	169.184	96.4185	797.776	755.652	0.569904	0.947198	0.722313	1.0151
SNRPD1	182.938	104.267	784.022	655.87	0.569954	0.836546	0.722376	0.896518
LSM7	196.693	112.115	269.593	205.17	0.569997	0.761033	0.722431	0.815593
LDAH	237.957	135.659	1621.69	1529.24	0.570096	0.942995	0.722556	1.0106
PIH1D1	110.038	62.7841	708.37	585.238	0.570567	0.826175	0.723153	0.885404
SKA2	68.7738	39.2401	836.29	702.958	0.570567	0.840568	0.723153	0.900829
RNF31	151.302	86.3282	585.953	503.394	0.570567	0.859103	0.723153	0.920693
AL136295.5	151.302	86.3282	2258.53	2049.45	0.570567	0.907427	0.723153	0.972481
ROGDI	110.038	62.7841	361.75	332.98	0.570567	0.92047	0.723153	0.986459
ARMH3	151.302	86.3282	3200.73	3019.24	0.570567	0.943298	0.723153	1.01092
TTC26	55.0191	31.3921	240.708	243.289	0.570567	1.01072	0.723153	1.08318
LAMA3	68.7738	39.2401	2379.57	2521.46	0.570567	1.05962	0.723153	1.13559
HMBS	123.793	70.6322	211.823	159.203	0.570567	0.751582	0.723153	0.805463
ALKBH3	123.793	70.6322	691.865	603.176	0.570567	0.871812	0.723153	0.934313
ADAL	123.793	70.6322	262.716	230.956	0.570567	0.879109	0.723153	0.942133
CCDC6	165.057	94.1762	1631.32	1540.45	0.570567	0.944302	0.723153	1.012
EXOC4	215.95	123.326	8566.47	8286.38	0.571086	0.967305	0.723811	1.03665
PEX12	174.686	99.7819	187.065	146.87	0.571209	0.785129	0.723967	0.841416
IFIT5	174.686	99.7819	462.16	408.097	0.571209	0.883021	0.723967	0.946325
RAMAC	147.176	84.0859	170.559	136.78	0.571329	0.801949	0.724119	0.859442
LYRM7	147.176	84.0859	231.08	218.623	0.571329	0.946093	0.724119	1.01392
LIMK2	105.912	60.5418	894.06	809.467	0.571626	0.905383	0.724495	0.970291
UTP18	198.069	113.236	1026.11	941.762	0.571699	0.917802	0.724588	0.9836
ZNF132	92.1569	52.6938	222.827	237.683	0.571784	1.06667	0.724695	1.14314
VGLL4	156.804	89.6916	4921.45	4588.85	0.571997	0.932417	0.724966	0.999263
LGALS8	143.05	81.8436	990.343	787.044	0.572135	0.794719	0.72514	0.851693
PPARA	143.05	81.8436	1089.38	1015.76	0.572135	0.93242	0.72514	0.999266
UCHL1	323.237	184.989	1308.08	1243.35	0.572301	0.950517	0.725351	1.01866
PDCL	129.295	73.9956	577.7	415.945	0.572301	0.720001	0.725351	0.771619
HELB	64.6474	36.9978	248.961	234.319	0.572301	0.941188	0.725351	1.00866
EPDR1	64.6474	36.9978	206.321	211.896	0.572301	1.02702	0.725351	1.10065
DMAC1	231.08	132.295	182.938	168.172	0.572508	0.919281	0.725613	0.985185
ACHE	50.8926	29.1498	324.612	239.925	0.57277	0.739112	0.725945	0.7921
ASH1L	101.785	58.2996	4935.21	4327.62	0.57277	0.876887	0.725945	0.939752
ADAMTS6	88.0305	50.4515	3343.78	3404.92	0.573114	1.01828	0.726382	1.09128
HLTF	111.414	63.9053	683.612	611.024	0.573586	0.893817	0.726979	0.957896
AL117339.5	74.2757	42.6035	1850.02	1676.11	0.573586	0.905999	0.726979	0.970951
ZNF37A	74.2757	42.6035	1416.74	1297.17	0.573586	0.915598	0.726979	0.981238
ALKBH1	111.414	63.9053	823.91	759.015	0.573586	0.921235	0.726979	0.987279
ELP1	111.414	63.9053	872.052	834.132	0.573586	0.956516	0.726979	1.02509
CEP89	134.797	77.359	1259.94	1124.51	0.573894	0.892512	0.72737	0.956497
AP5M1	60.521	34.7555	621.715	585.238	0.574272	0.941328	0.727849	1.00881
ANAPC1	181.563	104.267	2142.99	2129.05	0.574272	0.993496	0.727849	1.06472
COASY	204.946	117.72	308.107	282.529	0.574396	0.916983	0.728007	0.982722
ERBB2	83.9041	48.2092	828.037	742.198	0.574576	0.896335	0.728234	0.960594
SEMA3C	167.808	96.4185	3922.86	3600	0.574576	0.917697	0.728234	0.983488
CHMP1A	191.191	109.872	462.16	419.308	0.574672	0.907279	0.728356	0.972323
ACAD8	130.67	75.1167	265.467	235.441	0.574857	0.886892	0.72859	0.950474
MYCBPAP	154.053	88.5705	423.647	359.888	0.574934	0.849499	0.728688	0.910401
PSMB1	247.586	142.385	858.297	766.863	0.575095	0.893471	0.728893	0.957524
MAP7D2	46.7662	26.9075	434.651	336.344	0.575362	0.773825	0.72923	0.829301
CFAP300	46.7662	26.9075	246.21	207.412	0.575362	0.842418	0.72923	0.902811
ACBD5	233.831	134.537	884.431	760.137	0.575362	0.859464	0.72923	0.921079
DTX3	46.7662	26.9075	116.916	107.63	0.575362	0.920579	0.72923	0.986576
PDCD1LG2	46.7662	26.9075	529.558	493.304	0.575362	0.931538	0.72923	0.998321
ATPAF2	93.5324	53.815	643.723	603.176	0.575362	0.937012	0.72923	1.00419
AC003006.1	70.1493	40.3612	1814.25	1645.84	0.575362	0.907173	0.72923	0.972209
ZNF551	70.1493	40.3612	741.382	697.352	0.575362	0.940612	0.72923	1.00804
IGFBP5	327.363	188.352	1043.99	1056.12	0.575362	1.01162	0.72923	1.08414
GMPS	173.31	99.7819	1790.87	1707.5	0.575742	0.953449	0.729712	1.0218
BCDIN3D	253.088	145.749	518.555	438.368	0.575883	0.845365	0.729891	0.90597
RFNG	103.161	59.4207	167.808	135.659	0.576001	0.808415	0.73004	0.866371
PUS7L	103.161	59.4207	484.168	402.491	0.576001	0.831305	0.73004	0.890902
RWDD2B	103.161	59.4207	270.969	261.227	0.576001	0.964047	0.73004	1.03316
ZNF708	182.938	105.388	746.884	640.174	0.576083	0.857127	0.730144	0.918575
NUAK1	182.938	105.388	1105.88	1086.39	0.576083	0.982373	0.730144	1.0528
NLRP10	56.3945	32.5132	96.2834	71.7533	0.576531	0.745231	0.730712	0.798657
GLIPR1	56.3945	32.5132	129.295	108.751	0.576531	0.84111	0.730712	0.901409
SEC31A	202.195	116.599	3588.62	3554.03	0.576667	0.990362	0.730884	1.06136
PRELID3B	145.801	84.0859	400.264	320.648	0.576719	0.801091	0.73095	0.858522
ZNF346	145.801	84.0859	1599.68	1416.01	0.576719	0.885182	0.73095	0.948641
PIGO	89.406	51.5727	262.716	216.381	0.576837	0.823631	0.7311	0.882678
CEPT1	155.429	89.6916	733.129	724.26	0.577059	0.987902	0.731381	1.05873
TMEM87A	188.44	108.751	1469.01	1350.98	0.577112	0.919654	0.731448	0.985585
ATG3	221.452	127.811	733.129	667.081	0.577149	0.90991	0.731495	0.975142
ZNF671	66.0229	38.1189	210.448	196.2	0.57736	0.932299	0.731762	0.999137
GXYLT1	141.674	81.8436	870.677	739.956	0.577689	0.849863	0.73218	0.91079
C3orf38	141.674	81.8436	563.945	488.819	0.577689	0.866785	0.73218	0.928925
MRPS24	217.325	125.568	121.042	106.509	0.57779	0.879933	0.732307	0.943016
ARL14EP	292.976	169.293	610.712	474.244	0.577838	0.776544	0.732368	0.832215
PLAA	151.302	87.4493	994.47	901.401	0.577977	0.906414	0.732545	0.971395
C3orf70	75.6512	43.7247	290.226	280.286	0.577977	0.965753	0.732545	1.03499
KLC4	75.6512	43.7247	185.689	211.896	0.577977	1.14113	0.732545	1.22294
PDCD2	279.222	161.445	763.389	714.17	0.578196	0.935525	0.732822	1.00259
PSMC1	160.931	93.0551	859.673	778.075	0.57823	0.905083	0.732866	0.969969
IQCB1	127.919	73.9956	1264.06	1142.45	0.578455	0.90379	0.733151	0.968583
MCTS1	127.919	73.9956	397.513	383.432	0.578455	0.964577	0.733151	1.03373
IMMP1L	85.2795	49.3304	968.335	812.83	0.578455	0.83941	0.733151	0.899588
HSPBAP1	180.187	104.267	1101.76	1016.88	0.578656	0.922961	0.733405	0.989129
SETD4	137.548	79.6013	570.823	554.967	0.578718	0.972223	0.733484	1.04192
ZIK1	94.9079	54.9361	264.091	250.015	0.578836	0.9467	0.733634	1.01457
RBM17	294.352	170.414	867.926	763.5	0.578947	0.879684	0.733774	0.942749
ACTN4	735.88	426.035	3976.5	3799.56	0.578947	0.955503	0.733774	1.024
PRUNE1	52.2681	30.2709	222.827	235.441	0.579147	1.05661	0.734028	1.13235
SUMO1	176.061	102.024	1162.28	1139.08	0.579482	0.980044	0.734452	1.0503
ALYREF	185.689	107.63	226.954	198.443	0.579624	0.874376	0.734632	0.93706
XRCC1	61.8964	35.8766	662.98	505.637	0.579624	0.762673	0.734632	0.817349
C1D	123.793	71.7533	376.881	319.526	0.579624	0.847819	0.734632	0.9086
AGO4	61.8964	35.8766	870.677	755.652	0.579624	0.86789	0.734632	0.93011
BORCS7-ASMT	61.8964	35.8766	507.551	460.791	0.579624	0.907871	0.734632	0.972957
NOS1AP	61.8964	35.8766	1825.26	1725.44	0.579624	0.945315	0.734632	1.01309
APOOL	61.8964	35.8766	595.581	588.601	0.579624	0.98828	0.734632	1.05913
BORCS7	61.8964	35.8766	105.912	110.993	0.579624	1.04798	0.734632	1.12311
MRPS22	133.421	77.359	557.068	496.667	0.579811	0.891574	0.734868	0.955492
ZZEF1	143.05	82.9648	2994.41	2715.41	0.579972	0.906827	0.735073	0.971838
EDC3	81.1531	47.0881	1065.99	984.366	0.580238	0.923425	0.73541	0.989626
MRPS27	162.306	94.1762	2185.63	2021.42	0.580238	0.92487	0.73541	0.991174
PEX16	171.935	99.7819	334.241	330.738	0.580348	0.98952	0.73555	1.06046
SLC7A7	90.7814	52.6938	332.865	266.833	0.580447	0.801623	0.735675	0.859092
COMMD9	90.7814	52.6938	324.612	283.65	0.580447	0.87381	0.735675	0.936455
DCAF17	181.563	105.388	760.639	668.203	0.580447	0.878476	0.735675	0.941455
LATS1	181.563	105.388	1499.27	1365.55	0.580447	0.910814	0.735675	0.976111
ZNF549	90.7814	52.6938	695.991	655.87	0.580447	0.942354	0.735675	1.00991
ZNF573	100.41	58.2996	590.079	460.791	0.580616	0.780896	0.73589	0.836879
GNG11	100.41	58.2996	225.578	178.262	0.580616	0.790245	0.73589	0.846899
BMPR2	100.41	58.2996	2827.98	2724.38	0.580616	0.963367	0.73589	1.03243
MRFAP1L1	110.038	63.9053	127.919	127.811	0.580756	0.99915	0.736067	1.07078
LOX	119.666	69.511	524.057	395.764	0.580873	0.755194	0.736215	0.809334
SLC9B2	119.666	69.511	834.914	719.775	0.580873	0.862095	0.736215	0.923899
BCKDK	138.923	80.7225	181.563	140.143	0.581058	0.771871	0.73645	0.827207
KPNA3	138.923	80.7225	1529.53	1407.04	0.581058	0.919915	0.73645	0.985864
PTK7	148.551	86.3282	1697.34	1553.91	0.581133	0.915497	0.736545	0.981129
DHX16	167.808	97.5396	584.578	561.694	0.581257	0.960854	0.736702	1.02974
MTPN	177.436	103.145	1313.58	1219.81	0.581309	0.928612	0.736767	0.995185
CCDC174	187.065	108.751	834.914	707.443	0.581355	0.847324	0.736826	0.908069
SMN1	225.578	131.174	759.263	702.958	0.581501	0.925843	0.737012	0.992217
APOM	134.797	78.4802	431.9	355.403	0.582211	0.822883	0.737911	0.881877
PPP1R12A	231.08	134.537	4453.79	3875.8	0.582211	0.870224	0.737911	0.932611
ZNF429	115.54	67.2687	580.451	520.211	0.582211	0.896219	0.737911	0.96047
NDUFA10	48.1417	28.0286	2492.36	2353.28	0.582211	0.944198	0.737911	1.01189
FBLIM1	105.912	61.663	643.723	621.115	0.582211	0.964879	0.737911	1.03405
MMGT1	57.77	33.6344	89.406	86.3282	0.582211	0.965575	0.737911	1.0348
RRAGB	86.655	50.4515	486.919	485.456	0.582211	0.996996	0.737911	1.06847
HNRNPK	294.352	171.535	2361.69	2195.2	0.582756	0.929504	0.738601	0.996141
SSBP1	169.184	98.6608	1610.68	1482.15	0.583158	0.920202	0.739111	0.986172
NID1	140.299	81.8436	1739.98	1077.42	0.583353	0.619215	0.739358	0.663607
MTERF1	140.299	81.8436	1228.3	1117.78	0.583353	0.910023	0.739358	0.975263
BTN2A1	130.67	76.2379	1023.35	909.249	0.583437	0.888498	0.739465	0.952196
PNKP	121.042	70.6322	2020.57	1783.74	0.583535	0.882789	0.739588	0.946077
NBPF9	121.042	70.6322	1127.89	1025.85	0.583535	0.909528	0.739588	0.974733
ECHDC2	111.414	65.0264	649.225	534.786	0.583649	0.82373	0.739733	0.882784
HDGFL3	111.414	65.0264	2130.61	1896.98	0.583649	0.890344	0.739733	0.954173
VAV2	111.414	65.0264	3306.65	3293.92	0.583649	0.996153	0.739733	1.06757
CFAP70	101.785	59.4207	469.037	451.822	0.583785	0.963295	0.739906	1.03235
MCMBP	295.727	172.656	2225.52	2032.64	0.583836	0.913331	0.739971	0.978808
AC012184.2	193.942	113.236	1954.55	1792.71	0.583863	0.917198	0.740005	0.982953
CCDC9	184.314	107.63	651.976	662.597	0.583949	1.01629	0.740114	1.08915
THOC7	82.5286	48.2092	627.217	612.145	0.584152	0.97597	0.740371	1.04594
P2RX4	155.429	90.8128	502.049	461.912	0.584272	0.920053	0.740524	0.986013
TRIM61	72.9003	42.6035	270.969	206.291	0.584408	0.761308	0.740696	0.815887
IPO8	72.9003	42.6035	984.841	802.74	0.584408	0.815096	0.740696	0.873531
APOPT1	72.9003	42.6035	1328.71	1223.17	0.584408	0.920569	0.740696	0.986565
AL139300.1	72.9003	42.6035	4814.17	4540.64	0.584408	0.943182	0.740696	1.0108
ZNF582	63.2719	36.9978	191.191	150.233	0.584743	0.785776	0.74112	0.842109
PRXL2A	63.2719	36.9978	382.382	325.132	0.584743	0.85028	0.74112	0.911237
PPARG	126.544	73.9956	1552.91	1467.58	0.584743	0.945049	0.74112	1.0128
REXO4	126.544	73.9956	449.781	427.156	0.584743	0.949699	0.74112	1.01778
ZFR	180.187	105.388	3203.48	3012.52	0.584878	0.940388	0.741291	1.0078
GLT8D2	116.916	68.3899	848.669	737.714	0.584951	0.86926	0.741384	0.931577
ATG13	116.916	68.3899	1393.36	1311.74	0.584951	0.941424	0.741384	1.00892
BBS10	170.559	99.7819	199.444	162.566	0.585029	0.815096	0.741482	0.873531
LIF	160.931	94.1762	695.991	556.088	0.585197	0.798987	0.741696	0.856267
MAD2L1	53.6436	31.3921	236.582	197.322	0.585197	0.834052	0.741696	0.893845
ZNF408	107.287	62.7841	196.693	164.808	0.585197	0.837896	0.741696	0.897965
ZNF689	160.931	94.1762	385.133	332.98	0.585197	0.864584	0.741696	0.926567
ATP8B2	204.946	119.963	1385.1	1384.61	0.585337	0.999646	0.741873	1.07131
ANKRD24	97.6588	57.1784	420.896	329.617	0.585491	0.783131	0.742069	0.839275
LRRC23	88.0305	51.5727	511.677	395.764	0.58585	0.773465	0.742523	0.828915
C16orf71	88.0305	51.5727	68.7738	67.2687	0.58585	0.978115	0.742523	1.04824
SLX4IP	342.494	200.685	1452.5	1354.34	0.585952	0.93242	0.742653	0.999266
ACTL6A	122.417	71.7533	453.907	429.399	0.586136	0.946005	0.742886	1.01383
ADH5	323.237	189.474	839.041	775.833	0.586175	0.924666	0.742936	0.990956
HDAC4	156.804	91.9339	5233.69	5072.06	0.586297	0.969118	0.74309	1.03859
MFSD8	156.804	91.9339	702.868	705.2	0.586297	1.00332	0.74309	1.07525
SNX19	347.996	204.048	1558.41	1407.04	0.586354	0.902864	0.743161	0.967591
TOPBP1	112.789	66.1476	1173.28	1076.3	0.586471	0.917341	0.743311	0.983106
GATB	112.789	66.1476	741.382	692.868	0.586471	0.934563	0.743311	1.00156
AP2B1	181.563	106.509	4451.04	3873.56	0.586622	0.870258	0.743502	0.932648
TXNDC9	181.563	106.509	517.179	458.548	0.586622	0.886634	0.743502	0.950197
RNPS1	387.884	227.592	884.431	859.918	0.586753	0.972284	0.743668	1.04199
PMPCB	171.935	100.903	966.96	931.672	0.586869	0.963506	0.743815	1.03258
MPDU1	206.321	121.084	610.712	591.965	0.586869	0.969303	0.743815	1.03879
SPAG16	137.548	80.7225	1074.25	984.366	0.586869	0.916331	0.743815	0.982023
LIMA1	68.7738	40.3612	1444.25	1346.5	0.586869	0.932314	0.743815	0.999153
TRIM44	137.548	80.7225	3163.6	3061.85	0.586869	0.967838	0.743815	1.03722
DOK1	68.7738	40.3612	90.7814	96.4185	0.586869	1.06209	0.743815	1.13824
CDK4	246.21	144.628	429.149	401.37	0.587416	0.93527	0.744507	1.00232
GNPTAB	152.678	89.6916	788.148	720.896	0.587457	0.914671	0.744559	0.980245
ZNF862	152.678	89.6916	975.213	898.037	0.587457	0.920863	0.744559	0.98688
GPANK1	211.823	124.447	536.436	406.976	0.587504	0.758666	0.74462	0.813056
MRPL18	118.291	69.511	255.839	226.471	0.587627	0.885212	0.744776	0.948673
GSTM2	59.1455	34.7555	299.854	269.075	0.587627	0.897353	0.744776	0.961685
YTHDF3	236.582	139.022	2010.95	1837.56	0.587627	0.913777	0.744776	0.979287
GTF2F2	177.436	104.267	2393.33	2376.83	0.587627	0.993105	0.744776	1.0643
ZNF837	143.05	84.0859	396.137	353.161	0.58781	0.891511	0.745007	0.955424
DNAJC13	276.471	162.566	3636.76	3316.35	0.588005	0.911896	0.745254	0.977271
PRPF38B	350.747	206.291	850.044	773.59	0.588148	0.910059	0.745435	0.975301
CROCC	474.539	279.165	1475.89	1307.26	0.588287	0.885743	0.745611	0.949242
LEMD3	232.456	136.78	1401.61	1352.1	0.588412	0.964677	0.745771	1.03384
KCNN2	49.5172	29.1498	213.199	163.687	0.58868	0.767768	0.74611	0.82281
RNASE4	222.827	131.174	327.363	269.075	0.58868	0.821945	0.74611	0.880871
AL163636.2	222.827	131.174	325.988	267.954	0.58868	0.821974	0.74611	0.880902
COX8A	123.793	72.8744	148.551	125.568	0.58868	0.845285	0.74611	0.905884
AP000721.1	123.793	72.8744	1015.1	866.645	0.58868	0.853752	0.74611	0.914958
WNT11	99.0343	58.2996	185.689	170.414	0.58868	0.917738	0.74611	0.983531
CLSTN2	74.2757	43.7247	357.624	336.344	0.58868	0.940495	0.74611	1.00792
KDM4D	99.0343	58.2996	112.789	119.963	0.58868	1.0636	0.74611	1.13985
DOT1L	287.475	169.293	2319.05	2296.11	0.588897	0.990105	0.746385	1.06109
PPP4C	213.199	125.568	569.447	543.755	0.588973	0.954883	0.746481	1.02334
R3HDM1	114.165	67.2687	1757.86	1689.57	0.589226	0.96115	0.746802	1.03006
UPF2	154.053	90.8128	2338.31	2212.02	0.589489	0.945991	0.747135	1.01381
LARP7	64.6474	38.1189	601.083	423.793	0.589644	0.705049	0.747332	0.755594
PPP1R3D	129.295	76.2379	204.946	170.414	0.589644	0.831507	0.747332	0.891119
BANF1	169.184	99.7819	187.065	153.597	0.589785	0.821089	0.74751	0.879954
RBBP5	273.72	161.445	895.435	841.98	0.589818	0.940303	0.747552	1.00771
IFT20	104.536	61.663	165.057	132.295	0.589872	0.801511	0.747621	0.858972
TCF7L2	104.536	61.663	4470.3	4330.98	0.589872	0.968836	0.747621	1.03829
METTL22	368.628	217.502	1090.75	955.216	0.590032	0.87574	0.747824	0.938522
ATP8A1	39.8888	23.5441	781.271	578.511	0.590242	0.740474	0.74809	0.79356
ZAR1L	119.666	70.6322	96.2834	73.9956	0.590242	0.768519	0.74809	0.823615
TMEM267	358.999	211.896	1345.22	1164.87	0.590242	0.865935	0.74809	0.928015
CRADD	79.7776	47.0881	1151.27	1040.42	0.590242	0.903714	0.74809	0.968502
BMS1	159.555	94.1762	1210.42	1153.66	0.590242	0.953106	0.74809	1.02144
FKBP2	119.666	70.6322	309.482	295.982	0.590242	0.956379	0.74809	1.02494
AP001453.5	119.666	70.6322	309.482	295.982	0.590242	0.956379	0.74809	1.02494
MVB12A	79.7776	47.0881	453.907	437.247	0.590242	0.963295	0.74809	1.03235
CFLAR	134.797	79.6013	2638.16	2397.01	0.590529	0.90859	0.748453	0.973727
PMP22	134.797	79.6013	929.822	926.066	0.590529	0.99596	0.748453	1.06736
MYOF	134.797	79.6013	5909.05	6262.72	0.590529	1.05985	0.748453	1.13583
ZNF226	94.9079	56.0573	570.823	503.394	0.590649	0.881875	0.748606	0.945097
CERCAM	94.9079	56.0573	237.957	210.775	0.590649	0.885769	0.748606	0.94927
CTNND1	94.9079	56.0573	1492.39	1401.43	0.590649	0.939051	0.748606	1.00637
SETD1A	94.9079	56.0573	837.665	861.04	0.590649	1.0279	0.748606	1.1016
MRPS15	149.927	88.5705	339.743	287.013	0.590758	0.844796	0.748743	0.90536
PARL	204.946	121.084	1247.56	1143.57	0.590808	0.916646	0.748807	0.982361
AC131160.1	204.946	121.084	1640.94	1518.03	0.590808	0.925096	0.748807	0.991417
ARMH4	220.076	130.053	702.868	596.449	0.590945	0.848593	0.74898	0.909429
RUSC2	110.038	65.0264	2328.68	2138.02	0.590945	0.918126	0.74898	0.983948
GMFB	235.206	139.022	650.6	596.449	0.591064	0.916768	0.749131	0.982491
MFAP1	140.299	82.9648	546.064	422.672	0.591344	0.774033	0.749487	0.829524
HAUS7	70.1493	41.4824	268.218	285.892	0.591344	1.06589	0.749487	1.14231
TREX2	70.1493	41.4824	346.62	375.584	0.591344	1.08356	0.749487	1.16124
ZNF746	240.708	142.385	933.949	849.828	0.591527	0.90993	0.749718	0.975164
C1orf54	85.2795	50.4515	122.417	96.4185	0.591602	0.787621	0.749813	0.844086
ZNF345	85.2795	50.4515	673.983	567.3	0.591602	0.841711	0.749813	0.902054
FAT1	170.559	100.903	3499.21	3342.13	0.591602	0.95511	0.749813	1.02358
ZNF200	185.689	109.872	437.402	375.584	0.591699	0.85867	0.749937	0.920229
PIN1	185.689	109.872	342.494	329.617	0.591699	0.962402	0.749937	1.0314
TTC14	145.801	86.3282	719.374	678.293	0.592098	0.942893	0.750442	1.01049
DEDD	105.912	62.7841	440.152	346.434	0.592797	0.787077	0.751328	0.843503
TMEM106C	105.912	62.7841	143.05	116.599	0.592797	0.815096	0.751328	0.873531
FAM171A2	105.912	62.7841	207.697	177.141	0.592797	0.852882	0.751328	0.914026
AC098582.1	105.912	62.7841	1165.03	1004.55	0.592797	0.86225	0.751328	0.924066
MANEA	105.912	62.7841	222.827	216.381	0.592797	0.971071	0.751328	1.04069
FUOM	75.6512	44.8458	72.9003	51.5727	0.592797	0.707442	0.751328	0.758159
ANKRD34A	136.172	80.7225	255.839	189.474	0.592797	0.740598	0.751328	0.793692
TNRC6C	181.563	107.63	2847.24	2550.61	0.592797	0.895818	0.751328	0.96004
TAF1A	166.433	98.6608	489.67	451.822	0.592797	0.922707	0.751328	0.988856
ACSS1	75.6512	44.8458	617.589	598.692	0.592797	0.969401	0.751328	1.0389
DHX36	287.475	170.414	1529.53	1484.4	0.592797	0.970492	0.751328	1.04007
RPA3	151.302	89.6916	101.785	99.7819	0.592797	0.980318	0.751328	1.0506
MTSS1	90.7814	53.815	826.661	909.249	0.592797	1.0999	0.751328	1.17876
WBP2NL	75.6512	44.8458	167.808	190.595	0.592797	1.13579	0.751328	1.21722
RINT1	277.846	164.808	645.098	574.026	0.593164	0.889828	0.751793	0.95362
HSPB1	262.716	155.839	196.693	163.687	0.593185	0.832196	0.75182	0.891857
VPS4B	202.195	119.963	1134.77	1024.73	0.593301	0.903027	0.751967	0.967766
TAF11	171.935	102.024	306.731	251.137	0.59339	0.818751	0.752079	0.877448
GTF3C1	156.804	93.0551	2943.52	2626.84	0.593447	0.892416	0.752152	0.956394
CTSK	126.544	75.1167	614.838	535.907	0.593602	0.871624	0.752349	0.934111
CCAR1	253.088	150.233	2768.83	2447.46	0.593602	0.883932	0.752349	0.947301
KLHL28	253.088	150.233	888.558	848.707	0.593602	0.955151	0.752349	1.02363
MAPK12	111.414	66.1476	1368.6	1336.41	0.593712	0.976477	0.752487	1.04648
SH2D6	207.697	123.326	559.819	454.064	0.593778	0.811091	0.752572	0.869238
TBC1D12	192.567	114.357	1683.58	1492.24	0.593856	0.88635	0.75267	0.949893
SMCO4	81.1531	48.2092	493.796	377.826	0.594053	0.765146	0.75292	0.82
ACTR10	162.306	96.4185	1021.98	908.128	0.594053	0.888597	0.75292	0.952301
C1orf159	81.1531	48.2092	694.616	710.806	0.594053	1.02331	0.75292	1.09667
CCDC80	213.199	126.689	629.968	535.907	0.594231	0.85069	0.753146	0.911676
GTF2H1	248.961	147.991	1874.77	1788.23	0.594435	0.953836	0.753403	1.02222
FBXO42	218.701	130.053	2833.48	2372.34	0.594661	0.837254	0.753691	0.897277
GRTP1	50.8926	30.2709	339.743	273.559	0.5948	0.805196	0.753866	0.862921
SFXN1	239.333	142.385	1222.8	1141.33	0.594926	0.933372	0.754027	1.00029
PSMC2	137.548	81.8436	592.83	507.879	0.59502	0.856702	0.754145	0.918119
ZFAND2A	137.548	81.8436	350.747	312.8	0.59502	0.891811	0.754145	0.955745
TMEM161B	137.548	81.8436	1224.17	1109.93	0.59502	0.90668	0.754145	0.97168
BNIP1	86.655	51.5727	237.957	193.958	0.595149	0.815096	0.754309	0.873531
PREB	295.727	176.02	204.946	196.2	0.59521	0.957327	0.754386	1.02596
SRP72	122.417	72.8744	1050.86	913.733	0.595295	0.869507	0.754494	0.931842
RAI14	280.597	167.051	6592.66	6343.44	0.59534	0.962198	0.754551	1.03118
PXT1	107.287	63.9053	185.689	117.72	0.595647	0.633964	0.75494	0.679413
MTA3	107.287	63.9053	2108.61	2022.55	0.595647	0.959187	0.75494	1.02795
FAXDC2	178.812	106.509	464.911	369.978	0.595647	0.795804	0.75494	0.852855
ELP6	71.5248	42.6035	536.436	498.91	0.595647	0.930045	0.75494	0.996721
ATXN1	143.05	85.207	9724.62	9437.8	0.595647	0.970506	0.75494	1.04008
PARP10	71.5248	42.6035	324.612	329.617	0.595647	1.01542	0.75494	1.08821
ZC3HC1	163.682	97.5396	595.581	484.335	0.59591	0.813213	0.755274	0.871513
SMIM19	127.919	76.2379	694.616	584.117	0.595984	0.840921	0.755367	0.901207
GDAP2	127.919	76.2379	1144.4	1065.09	0.595984	0.930698	0.755367	0.997421
ZGPAT	184.314	109.872	653.351	587.48	0.596115	0.89918	0.755533	0.963642
NIPBL	92.1569	54.9361	3632.63	3365.68	0.596115	0.926512	0.755533	0.992934
KBTBD2	148.551	88.5705	1202.17	1090.87	0.596228	0.907424	0.755676	0.972478
PLA2G6	148.551	88.5705	374.13	341.949	0.596228	0.913986	0.755676	0.979511
TSN	112.789	67.2687	448.405	395.764	0.596412	0.882604	0.755909	0.945878
NUDT16	569.447	339.707	335.616	255.621	0.596556	0.761647	0.756092	0.81625
USP40	231.08	137.901	1401.61	1321.83	0.596767	0.94308	0.756359	1.01069
TBCEL	154.053	91.9339	1347.97	1148.05	0.596767	0.851692	0.756359	0.912751
DHX34	251.712	150.233	1209.04	1102.09	0.596846	0.911535	0.75646	0.976884
C12orf73	195.318	116.599	1111.39	927.187	0.596972	0.834263	0.756619	0.894072
CWF19L2	118.291	70.6322	1126.52	1098.72	0.597105	0.975328	0.756788	1.04525
MINDY3	138.923	82.9648	1390.61	1172.72	0.597199	0.843314	0.756907	0.903772
SLC38A7	159.555	95.2974	1032.98	921.581	0.597269	0.892156	0.756995	0.956115
ADORA2B	61.8964	36.9978	347.996	292.619	0.597737	0.84087	0.757589	0.901152
LMAN2L	123.793	73.9956	610.712	548.24	0.597737	0.897707	0.757589	0.962064
HINT3	61.8964	36.9978	360.375	346.434	0.597737	0.961315	0.757589	1.03023
RBMX2	103.161	61.663	192.567	154.718	0.597737	0.803452	0.757589	0.861052
ZNF710	82.5286	49.3304	1482.76	1403.67	0.597737	0.946661	0.757589	1.01453
MRPL4	185.689	110.993	268.218	261.227	0.597737	0.973935	0.757589	1.04376
NAPG	103.161	61.663	558.443	560.573	0.597737	1.00381	0.757589	1.07578
MRPS33	170.559	102.024	559.819	420.429	0.598175	0.75101	0.758144	0.80485
KIF22	170.559	102.024	431.9	418.187	0.598175	0.968251	0.758144	1.03767
MBNL1	149.927	89.6916	6876.01	6480.22	0.598236	0.942439	0.758221	1.01
EHHADH	129.295	77.359	184.314	153.597	0.598315	0.833344	0.758322	0.893087
INO80E	129.295	77.359	872.052	797.134	0.598315	0.91409	0.758322	0.979622
BEX4	129.295	77.359	97.6588	94.1762	0.598315	0.964339	0.758322	1.03347
MDM4	108.663	65.0264	1429.12	1315.1	0.598425	0.920219	0.758461	0.98619
COL16A1	196.693	117.72	1114.14	975.396	0.598497	0.875473	0.758552	0.938237
RPS17	352.122	210.775	717.999	701.837	0.598586	0.977491	0.758665	1.04757
MAML3	88.0305	52.6938	2206.26	2176.14	0.598586	0.986347	0.758665	1.05706
PDE12	269.593	161.445	473.164	372.22	0.598846	0.786662	0.758995	0.843059
FBXW8	202.195	121.084	2811.47	2630.21	0.598846	0.935526	0.758995	1.00259
BLZF1	134.797	80.7225	625.842	594.207	0.598846	0.949452	0.758995	1.01752
ZNF121	181.563	108.751	1068.75	957.458	0.598972	0.895871	0.759154	0.960097
NLE1	114.165	68.3899	691.865	692.868	0.599046	1.00145	0.759249	1.07324
PAPOLG	160.931	96.4185	867.926	726.502	0.59913	0.837056	0.759355	0.897065
RPS29	93.5324	56.0573	2486.86	2125.69	0.599335	0.854769	0.759615	0.916048
TNC	93.5324	56.0573	1063.24	972.033	0.599335	0.914215	0.759615	0.979756
CTIF	93.5324	56.0573	7983.27	7567.73	0.599335	0.947949	0.759615	1.01591
SFSWAP	140.299	84.0859	3207.61	3094.36	0.599335	0.964693	0.759615	1.03385
HS3ST3A1	187.065	112.115	1221.42	1227.65	0.599335	1.0051	0.759615	1.07716
TACO1	187.065	112.115	185.689	214.139	0.599335	1.15321	0.759615	1.23588
MANSC1	46.7662	28.0286	71.5248	82.9648	0.599335	1.15994	0.759615	1.2431
UBOX5	213.199	127.811	1305.33	1186.17	0.59949	0.908716	0.759811	0.973863
FASTKD5	213.199	127.811	408.517	377.826	0.59949	0.924873	0.759811	0.991178
PRSS27	119.666	71.7533	237.957	233.198	0.599611	0.98	0.759964	1.05026
CLHC1	72.9003	43.7247	814.282	687.262	0.599788	0.84401	0.760188	0.904518
BRF1	218.701	131.174	2257.16	2130.18	0.599788	0.943743	0.760188	1.0114
PAXIP1	125.168	75.1167	1118.26	1010.15	0.600126	0.903323	0.760616	0.968083
CENPA	360.375	216.381	2441.47	2344.31	0.600433	0.960206	0.761006	1.02904
SLC35F6	360.375	216.381	971.086	952.974	0.600433	0.981348	0.761006	1.0517
SOS2	412.643	247.773	2609.28	2210.9	0.600454	0.847322	0.761033	0.908067
MTIF3	130.67	78.4802	334.241	292.619	0.600597	0.875473	0.761214	0.938237
ZNF518A	52.2681	31.3921	928.447	821.8	0.600597	0.885134	0.761214	0.94859
TVP23C-CDRT4	104.536	62.7841	2468.98	2319.65	0.600597	0.939517	0.761214	1.00687
DHX37	156.804	94.1762	1075.62	1016.88	0.600597	0.945386	0.761214	1.01316
TVP23C	104.536	62.7841	1192.54	1145.81	0.600597	0.960817	0.761214	1.0297
FEM1A	188.44	113.236	702.868	732.108	0.60091	1.0416	0.761611	1.11627
GGPS1	162.306	97.5396	536.436	463.033	0.600961	0.863166	0.761675	0.925047
TMEM245	272.344	163.687	1931.17	1819.62	0.60103	0.942237	0.761763	1.00979
NLRX1	220.076	132.295	394.762	357.645	0.601133	0.905978	0.761894	0.970928
C3orf33	83.9041	50.4515	210.448	174.899	0.6013	0.831078	0.762105	0.890659
PTS	167.808	100.903	888.558	852.07	0.6013	0.958936	0.762105	1.02768
TSSC4	199.444	119.963	258.59	227.592	0.601485	0.88013	0.762339	0.943227
RNF219	115.54	69.511	922.945	809.467	0.601618	0.877048	0.762508	0.939924
ARHGAP24	57.77	34.7555	3565.24	3321.95	0.601618	0.931763	0.762508	0.998562
STPG1	115.54	69.511	962.834	926.066	0.601618	0.961813	0.762508	1.03077
HDHD2	231.08	139.022	823.91	816.194	0.601618	0.990634	0.762508	1.06165
EXOSC9	115.54	69.511	353.497	369.978	0.601618	1.04662	0.762508	1.12165
STOML2	204.946	123.326	191.191	200.685	0.601749	1.04966	0.762674	1.12491
TERF2	147.176	88.5705	1283.32	1144.69	0.6018	0.891975	0.762738	0.955922
PLEKHG4	178.812	107.63	264.091	219.744	0.601917	0.832077	0.762887	0.891729
EXOG	89.406	53.815	856.922	765.742	0.601917	0.893596	0.762887	0.957659
ZNF136	89.406	53.815	530.934	486.577	0.601917	0.916455	0.762887	0.982156
POLR3E	452.532	272.438	1613.43	1580.81	0.602031	0.979783	0.763032	1.05002
RAF1	242.084	145.749	2687.68	2491.18	0.602059	0.92689	0.763067	0.993339
CCNT1	152.678	91.9339	1105.88	1007.91	0.602143	0.911407	0.763173	0.976746
COMMD1	279.222	168.172	1869.27	1727.68	0.602288	0.924255	0.763357	0.990516
SLC24A1	126.544	76.2379	202.195	176.02	0.602462	0.870545	0.763578	0.932955
HCFC2	189.816	114.357	592.83	521.333	0.602462	0.879396	0.763578	0.94244
CCDC91	63.2719	38.1189	3431.81	3115.66	0.602462	0.907876	0.763578	0.972963
POLR1A	94.9079	57.1784	2704.19	2512.49	0.602462	0.92911	0.763578	0.995718
RFX7	221.452	133.416	2358.94	2237.81	0.602462	0.948648	0.763578	1.01666
ARF1	290.226	174.899	1552.91	1541.57	0.60263	0.992699	0.763791	1.06387
SLC30A6	258.59	155.839	1210.42	1018	0.602651	0.841031	0.763817	0.901325
TGOLN2	226.954	136.78	445.654	437.247	0.602677	0.981134	0.76385	1.05147
EIF2AK4	195.318	117.72	1770.24	1598.75	0.602712	0.903129	0.763894	0.967875
C1orf35	132.046	79.6013	130.67	118.841	0.602831	0.909475	0.764046	0.974676
MYL9	132.046	79.6013	795.025	737.714	0.602831	0.927912	0.764046	0.994435
DAXX	132.046	79.6013	215.95	218.623	0.602831	1.01238	0.764046	1.08496
ZBTB14	100.41	60.5418	231.08	176.02	0.602948	0.761727	0.764193	0.816335
NUP43	100.41	60.5418	533.685	519.09	0.602948	0.972653	0.764193	1.04238
TRMT11	169.184	102.024	2496.49	2347.68	0.603038	0.940392	0.764308	1.00781
SCN8A	137.548	82.9648	2936.64	2727.75	0.603171	0.928866	0.764476	0.995457
XYLT2	137.548	82.9648	673.983	643.537	0.603171	0.954827	0.764476	1.02328
NDUFB9	275.095	165.93	664.355	649.143	0.603171	0.977103	0.764476	1.04715
USF3	105.912	63.9053	672.608	612.145	0.603383	0.910107	0.764745	0.975353
SPTY2D1	286.099	172.656	592.83	589.722	0.603484	0.994757	0.764874	1.06607
TGIF2-RAB5IF	74.2757	44.8458	1485.51	1185.05	0.603775	0.797737	0.765241	0.854928
HOXA3	37.1379	22.4229	281.973	225.35	0.603775	0.799192	0.765241	0.856486
TGIF2	74.2757	44.8458	667.106	550.482	0.603775	0.82518	0.765241	0.884337
BTBD10	222.827	134.537	1089.38	945.125	0.603775	0.867583	0.765241	0.929781
VOPP1	111.414	67.2687	2206.26	2023.67	0.603775	0.917237	0.765241	0.982994
U2SURP	222.827	134.537	2071.47	1926.13	0.603775	0.929837	0.765241	0.996498
PRKD2	74.2757	44.8458	1030.23	1030.33	0.603775	1.0001	0.765241	1.0718
SH3BGR	228.329	137.901	466.287	344.192	0.603957	0.738155	0.765472	0.791074
ATP5MG	165.057	99.7819	766.14	619.993	0.604529	0.809242	0.766198	0.867258
AP001267.5	165.057	99.7819	2467.6	2055.06	0.604529	0.832815	0.766198	0.892521
NSUN6	170.559	103.145	1154.02	1028.09	0.604749	0.890874	0.766476	0.954741
EXOC2	213.199	128.932	2931.14	2622.36	0.604749	0.894655	0.766476	0.958793
TMEM63A	85.2795	51.5727	740.006	788.165	0.604749	1.06508	0.766476	1.14144
SLC33A1	224.203	135.659	1569.42	1340.89	0.605071	0.854386	0.766885	0.915638
AC104472.3	224.203	135.659	2184.26	1892.49	0.605071	0.866424	0.766885	0.928539
MRPS23	181.563	109.872	532.309	475.366	0.605147	0.893025	0.766981	0.957047
SMG6	90.7814	54.9361	4506.06	4278.29	0.605147	0.949452	0.766981	1.01752
IMPACT	229.705	139.022	415.394	394.643	0.605221	0.950046	0.767074	1.01816
SLC35B4	96.2834	58.2996	566.696	447.337	0.6055	0.789377	0.767428	0.845968
MLST8	96.2834	58.2996	269.593	267.954	0.6055	0.993918	0.767428	1.06517
TTC23	288.85	174.899	1378.23	1196.26	0.6055	0.867971	0.767428	0.930197
FOXP1	101.785	61.663	6922.77	6518.34	0.605815	0.941579	0.767827	1.00908
AQR	203.571	123.326	2104.48	2011.33	0.605815	0.95574	0.767827	1.02426
ETAA1	209.072	126.689	444.279	389.037	0.605959	0.87566	0.76801	0.938437
BDH1	53.6436	32.5132	405.766	308.315	0.606097	0.759835	0.768185	0.814308
NECAP1	160.931	97.5396	360.375	321.769	0.606097	0.892872	0.768185	0.956883
VPS50	53.6436	32.5132	1147.15	1076.3	0.606097	0.93824	0.768185	1.0055
KPNA5	112.789	68.3899	925.696	798.255	0.606352	0.86233	0.768508	0.924151
FKBP8	112.789	68.3899	502.049	545.998	0.606352	1.08754	0.768508	1.16551
BNC1	59.1455	35.8766	303.98	245.531	0.606583	0.807719	0.768801	0.865626
DGUOK	247.586	150.233	1108.63	991.092	0.606794	0.893976	0.769068	0.958066
FBXL18	188.44	114.357	1090.75	1116.66	0.60686	1.02375	0.769151	1.09715
KIAA2013	188.44	114.357	169.184	200.685	0.60686	1.1862	0.769151	1.27124
CNOT11	253.088	153.597	588.704	486.577	0.606892	0.826523	0.769192	0.885777
GFI1B	129.295	78.4802	173.31	134.537	0.606986	0.776282	0.769312	0.831934
UBIAD1	258.59	156.96	482.792	454.064	0.606986	0.940495	0.769312	1.00792
IREB2	134.797	81.8436	2402.96	2204.17	0.607163	0.917275	0.769536	0.983035
PLBD2	134.797	81.8436	460.785	497.789	0.607163	1.08031	0.769536	1.15775
POGLUT2	70.1493	42.6035	123.793	102.024	0.607326	0.824153	0.769743	0.883237
L3MBTL2	140.299	85.207	841.792	817.315	0.607326	0.970923	0.769743	1.04053
FYCO1	140.299	85.207	1704.22	1654.81	0.607326	0.97101	0.769743	1.04062
ZNF718	145.801	88.5705	1408.49	1327.44	0.607477	0.942455	0.769934	1.01002
TPM4	75.6512	45.967	2596.9	2365.62	0.607617	0.910939	0.770111	0.976245
ALG3	81.1531	49.3304	612.087	535.907	0.607868	0.875541	0.77043	0.938309
OSBPL11	81.1531	49.3304	949.079	863.282	0.607868	0.9096	0.77043	0.97481
POU2F1	162.306	98.6608	2291.54	2281.53	0.607868	0.99563	0.77043	1.06701
DNAL4	86.655	52.6938	360.375	331.859	0.608087	0.920872	0.770707	0.98689
ADGRB2	86.655	52.6938	236.582	224.229	0.608087	0.947786	0.770707	1.01573
WBP2	178.812	108.751	640.972	622.236	0.608187	0.970769	0.770834	1.04036
SP4	92.1569	56.0573	1166.4	968.67	0.608281	0.830475	0.770952	0.890012
ZKSCAN7	92.1569	56.0573	698.742	635.689	0.608281	0.909763	0.770952	0.974984
AKIP1	189.816	115.478	360.375	338.586	0.608369	0.939538	0.771064	1.00689
UFM1	195.318	118.841	562.57	474.244	0.608452	0.842997	0.771169	0.903432
OPA1	97.6588	59.4207	2133.36	1974.34	0.608452	0.925457	0.771169	0.991804
NUP58	298.478	181.626	2236.52	1964.25	0.608505	0.878258	0.771236	0.941221
PFDN5	206.321	125.568	174.686	169.293	0.608605	0.96913	0.771363	1.03861
ZNHIT2	211.823	128.932	170.559	160.324	0.608676	0.93999	0.771453	1.00738
CDC23	108.663	66.1476	502.049	440.61	0.608743	0.877624	0.771538	0.940541
SENP6	217.325	132.295	4059.03	3858.98	0.608743	0.950715	0.771538	1.01887
C8orf37	451.156	274.681	149.927	125.568	0.608837	0.83753	0.771657	0.897573
SNRPE	114.165	69.511	478.666	437.247	0.608867	0.91347	0.771695	0.978957
DLAT	114.165	69.511	693.24	651.385	0.608867	0.939624	0.771695	1.00699
TOX4	119.666	72.8744	733.129	577.39	0.60898	0.787569	0.771838	0.844031
GTF2F1	119.666	72.8744	385.133	348.676	0.60898	0.905339	0.771838	0.970243
TATDN3	125.168	76.2379	275.095	214.139	0.609083	0.778417	0.771969	0.834222
SAAL1	130.67	79.6013	540.562	581.874	0.609177	1.07642	0.772088	1.15359
BRCA1	141.674	86.3282	1206.29	995.577	0.609344	0.825319	0.7723	0.884487
PHLDB1	141.674	86.3282	2222.77	2085.33	0.609344	0.938167	0.7723	1.00543
NIPSNAP3A	152.678	93.0551	506.175	448.458	0.609486	0.885974	0.77248	0.94949
FAM32A	158.18	96.4185	266.842	243.289	0.60955	0.911731	0.772561	0.977094
POLR3C	169.184	103.145	682.236	757.894	0.609665	1.1109	0.772707	1.19054
ZNF253	180.187	109.872	585.953	535.907	0.609766	0.914591	0.772835	0.980159
TBC1D17	207.697	126.689	653.351	632.326	0.609972	0.967819	0.773097	1.0372
TXNRD2	207.697	126.689	1744.1	1715.35	0.609972	0.983515	0.773097	1.05402
GCC1	229.705	140.143	247.586	241.046	0.610102	0.973587	0.77326	1.04338
DDX1	251.712	153.597	1185.66	1115.54	0.610208	0.940859	0.773396	1.00831
C1orf52	262.716	160.324	462.16	404.733	0.610255	0.875743	0.773455	0.938526
PIGT	273.72	167.051	1008.22	862.161	0.610298	0.855128	0.773509	0.916433
RAD9B	49.5172	30.2709	74.2757	60.5418	0.611322	0.815096	0.774807	0.873531
AP3M1	126.544	77.359	777.144	693.989	0.611322	0.892999	0.774807	0.957019
LSM3	99.0343	60.5418	401.639	364.372	0.611322	0.907213	0.774807	0.972252
HTT	198.069	121.084	2371.32	2190.72	0.611322	0.923838	0.774807	0.990069
RAD51B	99.0343	60.5418	3716.54	3634.75	0.611322	0.977994	0.774807	1.04811
ZNF880	126.544	77.359	268.218	272.438	0.611322	1.01573	0.774807	1.08855
GDF5	137.548	84.0859	268.218	173.778	0.611322	0.647897	0.774807	0.694345
TSPYL4	181.563	110.993	198.069	139.022	0.611322	0.701888	0.774807	0.752207
LACC1	77.0267	47.0881	232.456	172.656	0.611322	0.74275	0.774807	0.795998
SKIDA1	71.5248	43.7247	634.095	503.394	0.611322	0.793879	0.774807	0.850792
ZNF444	77.0267	47.0881	493.796	411.46	0.611322	0.83326	0.774807	0.892997
OIP5	132.046	80.7225	133.421	112.115	0.611322	0.840305	0.774807	0.900547
C12orf4	132.046	80.7225	651.976	557.209	0.611322	0.854647	0.774807	0.915917
MRPL54	55.0191	33.6344	156.804	134.537	0.611322	0.857996	0.774807	0.919506
DHRS3	143.05	87.4493	2086.6	1800.56	0.611322	0.862916	0.774807	0.924779
RLIM	93.5324	57.1784	993.094	890.189	0.611322	0.89638	0.774807	0.960642
LEKR1	77.0267	47.0881	288.85	260.106	0.611322	0.900487	0.774807	0.965044
SKIV2L	104.536	63.9053	283.348	256.742	0.611322	0.906102	0.774807	0.971061
RBPJ	66.0229	40.3612	3675.27	3334.29	0.611322	0.907221	0.774807	0.972261
SETBP1	379.632	232.077	2826.6	2577.51	0.611322	0.911876	0.774807	0.977249
SYDE2	203.571	124.447	539.187	496.667	0.611322	0.921142	0.774807	0.987179
ADD1	231.08	141.264	2094.85	1932.85	0.611322	0.922669	0.774807	0.988816
PSMD7	203.571	124.447	980.715	905.885	0.611322	0.923699	0.774807	0.98992
POLR2J	247.586	151.355	265.467	245.531	0.611322	0.924902	0.774807	0.991208
MRPL11	82.5286	50.4515	125.168	116.599	0.611322	0.931538	0.774807	0.998321
FLAD1	165.057	100.903	502.049	472.002	0.611322	0.940152	0.774807	1.00755
BCKDHA	231.08	141.264	577.7	558.33	0.611322	0.966471	0.774807	1.03576
ACOT1	71.5248	43.7247	121.042	117.72	0.611322	0.972558	0.774807	1.04228
KIF3C	60.521	36.9978	471.788	470.881	0.611322	0.998077	0.774807	1.06963
DMAP1	60.521	36.9978	187.065	189.474	0.611322	1.01288	0.774807	1.08549
ZNF615	148.551	90.8128	229.705	233.198	0.611322	1.01521	0.774807	1.08799
CDH13	60.521	36.9978	4057.66	4369.1	0.611322	1.07676	0.774807	1.15395
LRP3	281.973	172.656	751.01	707.443	0.612316	0.941988	0.776067	1.00952
DRG1	215.95	132.295	3181.48	2851.07	0.61262	0.896147	0.776452	0.960393
TMEM115	204.946	125.568	393.386	345.313	0.61269	0.877796	0.77654	0.940725
NUP214	193.942	118.841	2834.86	2550.61	0.612767	0.89973	0.776639	0.964232
TRIM23	149.927	91.9339	697.367	632.326	0.613191	0.906734	0.777176	0.971738
ZNF646	149.927	91.9339	907.814	873.372	0.613191	0.96206	0.777176	1.03103
MRPL30	144.425	88.5705	447.03	347.555	0.613263	0.777476	0.777267	0.833214
TGS1	288.85	177.141	1771.61	1494.49	0.613263	0.843574	0.777267	0.90405
ENSA	144.425	88.5705	1385.1	1319.59	0.613263	0.952699	0.777267	1.021
NAMPT	394.762	242.167	2797.72	2499.03	0.613452	0.893239	0.777507	0.957276
RECQL5	127.919	78.4802	1103.13	1088.63	0.613513	0.986856	0.777584	1.0576
MFSD11	122.417	75.1167	729.003	598.692	0.613612	0.821248	0.777709	0.880123
DZIP1	244.835	150.233	1061.87	975.396	0.613612	0.918567	0.777709	0.984419
SPAST	116.916	71.7533	1103.13	908.128	0.613719	0.823227	0.777845	0.882244
LRRC8E	116.916	71.7533	148.551	135.659	0.613719	0.913209	0.777845	0.978678
IFIH1	111.414	68.3899	1360.35	1315.1	0.613838	0.966742	0.777996	1.03605
AFG1L	111.414	68.3899	1319.08	1279.23	0.613838	0.969786	0.777996	1.03931
CBLL1	217.325	133.416	724.876	645.78	0.613901	0.890883	0.778076	0.954751
PIPOX	105.912	65.0264	717.999	624.478	0.613968	0.869748	0.778161	0.932101
CELSR3	100.41	61.663	598.332	554.967	0.614113	0.927523	0.778345	0.994018
ERCC6L2	200.82	123.326	2661.55	2611.15	0.614113	0.981064	0.778345	1.0514
HELLS	94.9079	58.2996	735.88	674.929	0.614275	0.917173	0.77855	0.982926
BRD2	94.9079	58.2996	4405.65	4142.63	0.614275	0.9403	0.77855	1.00771
PSG4	94.9079	58.2996	1217.3	1223.17	0.614275	1.00482	0.77855	1.07686
PRDX3	279.222	171.535	539.187	447.337	0.614333	0.829651	0.778624	0.88913
ZNF527	279.222	171.535	243.459	209.654	0.614333	0.861147	0.778624	0.922883
TRIT1	178.812	109.872	830.788	690.626	0.614457	0.83129	0.77878	0.890886
ZNF507	167.808	103.145	1265.44	1274.74	0.614663	1.00735	0.779041	1.07957
IRAK3	83.9041	51.5727	583.202	639.053	0.614663	1.09577	0.779041	1.17432
CPLANE2	156.804	96.4185	127.919	110.993	0.614897	0.867683	0.779338	0.929888
RIMKLB	156.804	96.4185	1602.43	1450.76	0.614897	0.905351	0.779338	0.970256
CHST3	78.4022	48.2092	1096.25	1024.73	0.614897	0.934752	0.779338	1.00177
SGCE	78.4022	48.2092	676.734	680.535	0.614897	1.00562	0.779338	1.07771
CREB3L2	151.302	93.0551	3159.47	3051.76	0.615027	0.965908	0.779503	1.03515
CEP44	72.9003	44.8458	591.455	513.485	0.615167	0.868172	0.77968	0.930412
AC010323.1	291.601	179.383	757.888	679.414	0.615167	0.896458	0.77968	0.960725
ATF7-NPFF	72.9003	44.8458	2112.73	1941.82	0.615167	0.919106	0.77968	0.984997
ATF7	72.9003	44.8458	2057.71	1900.34	0.615167	0.923521	0.77968	0.989729
NDUFA7	291.601	179.383	524.057	486.577	0.615167	0.928482	0.77968	0.995046
EEF2K	72.9003	44.8458	862.424	811.709	0.615167	0.941195	0.77968	1.00867
MB21D2	72.9003	44.8458	997.22	979.881	0.615167	0.982612	0.77968	1.05306
ZNF774	67.3983	41.4824	288.85	235.441	0.615481	0.815096	0.780078	0.873531
COPS3	196.693	121.084	1159.53	1047.15	0.615597	0.903084	0.780225	0.967827
EPB41L2	118.291	72.8744	1883.03	1768.05	0.616061	0.938938	0.780813	1.00625
AL162231.3	118.291	72.8744	493.796	496.667	0.616061	1.00581	0.780813	1.07792
DIS3L2	174.686	107.63	4252.97	3967.73	0.616136	0.932932	0.780908	0.999814
MKRN2OS	112.789	69.511	82.5286	53.815	0.616292	0.652077	0.781106	0.698825
TMEM200A	56.3945	34.7555	628.593	519.09	0.616292	0.825797	0.781106	0.884999
DYNC1I2	56.3945	34.7555	1848.64	1595.39	0.616292	0.863007	0.781106	0.924877
SLC16A7	56.3945	34.7555	1364.47	1291.56	0.616292	0.946563	0.781106	1.01442
EPSTI1	112.789	69.511	2547.38	2459.79	0.616292	0.965616	0.781106	1.03484
PAK1IP1	163.682	100.903	392.011	364.372	0.616459	0.929495	0.781318	0.996132
SLC35D2	209.072	128.932	1356.22	1192.9	0.616684	0.879576	0.781604	0.942634
SPART	310.858	191.716	2334.18	2181.75	0.616732	0.934695	0.781664	1.0017
KCTD7	254.463	156.96	452.532	385.674	0.616829	0.852258	0.781787	0.913357
AC027644.4	254.463	156.96	6976.42	6133.79	0.616829	0.879217	0.781787	0.942249
ZNF436	101.785	62.7841	280.597	250.015	0.616829	0.891012	0.781787	0.954889
AC007326.4	50.8926	31.3921	66.0229	79.6013	0.616829	1.20566	0.781787	1.2921
TMEM129	96.2834	59.4207	547.44	491.062	0.617144	0.897015	0.782186	0.961323
PNISR	141.674	87.4493	899.562	774.711	0.617257	0.86121	0.782329	0.922951
MSANTD2	141.674	87.4493	763.389	670.445	0.617257	0.878248	0.782329	0.94121
STXBP2	187.065	115.478	414.018	395.764	0.617315	0.95591	0.782403	1.02444
PTCD3	187.065	115.478	1327.33	1287.07	0.617315	0.969669	0.782403	1.03918
KRT86	45.3907	28.0286	178.812	125.568	0.617497	0.702236	0.782633	0.75258
CYB5R4	226.954	140.143	1471.76	1346.5	0.617497	0.914888	0.782633	0.980477
TMED7-TICAM2	136.172	84.0859	1667.08	1547.18	0.617497	0.92808	0.782633	0.994614
TMED7	136.172	84.0859	448.405	458.548	0.617497	1.02262	0.782633	1.09593
TMTC1	130.67	80.7225	2977.91	2985.61	0.617757	1.00259	0.782963	1.07446
QRICH1	215.95	133.416	2200.76	2040.48	0.617812	0.927172	0.783032	0.993641
PDHB	170.559	105.388	222.827	192.837	0.617895	0.86541	0.783138	0.927452
TCEAL3	85.2795	52.6938	242.084	213.018	0.617895	0.879933	0.783138	0.943016
HPS5	455.283	281.407	654.727	569.542	0.618094	0.869892	0.78339	0.932256
FMC1	244.835	151.355	352.122	257.863	0.618191	0.732313	0.783513	0.784813
LUC7L2	244.835	151.355	3162.22	2688.51	0.618191	0.850196	0.783513	0.911147
FMC1-LUC7L2	244.835	151.355	3119.58	2662.72	0.618191	0.853551	0.783513	0.914742
SSRP1	119.666	73.9956	368.628	326.253	0.618349	0.885048	0.783713	0.948498
MSMO1	119.666	73.9956	444.279	413.703	0.618349	0.931178	0.783713	0.997935
ZNF514	159.555	98.6608	1021.98	930.551	0.618349	0.910538	0.783713	0.975815
HSD17B7	79.7776	49.3304	181.563	239.925	0.618349	1.32144	0.783713	1.41618
HSF1	308.107	190.595	916.067	829.648	0.6186	0.905662	0.784031	0.97059
ZNF843	154.053	95.2974	276.471	264.59	0.6186	0.957028	0.784031	1.02564
RPL26L1	148.551	91.9339	583.202	464.154	0.618869	0.795872	0.784373	0.852929
PRPS1	74.2757	45.967	235.206	206.291	0.618869	0.877062	0.784373	0.93994
COG7	74.2757	45.967	848.669	774.711	0.618869	0.912855	0.784373	0.978298
CMPK1	148.551	91.9339	834.914	809.467	0.618869	0.969521	0.784373	1.03903
COQ5	177.436	109.872	504.8	460.791	0.61922	0.912819	0.784817	0.978259
ARID2	246.21	152.476	3324.53	2986.73	0.619291	0.898393	0.784907	0.962799
AC092587.1	240.708	149.112	935.324	710.806	0.619473	0.759957	0.785138	0.814439
HSCB	240.708	149.112	938.075	829.648	0.619473	0.884415	0.785138	0.947819
LIPT1	240.708	149.112	204.946	184.989	0.619473	0.902623	0.785138	0.967333
TAP1	68.7738	42.6035	1156.78	1065.09	0.619473	0.920739	0.785138	0.986747
FLYWCH1	103.161	63.9053	877.554	843.101	0.619473	0.96074	0.785138	1.02962
SUPT3H	132.046	81.8436	2286.04	2034.88	0.619813	0.890132	0.785568	0.953946
PDSS2	132.046	81.8436	2074.22	1988.91	0.619813	0.958873	0.785568	1.02762
FBLN5	97.6588	60.5418	682.236	631.205	0.619932	0.9252	0.78572	0.991528
NSL1	97.6588	60.5418	722.125	722.018	0.619932	0.999851	0.78572	1.07153
COMMD8	224.203	139.022	255.839	193.958	0.620073	0.758127	0.785898	0.812478
LMTK3	63.2719	39.2401	129.295	117.72	0.620182	0.910479	0.786036	0.975752
WDR19	63.2719	39.2401	917.443	908.128	0.620182	0.989847	0.786036	1.06081
TMEM98	126.544	78.4802	445.654	465.275	0.620182	1.04403	0.786036	1.11887
ZWINT	155.429	96.4185	111.414	97.5396	0.620338	0.875473	0.786235	0.938237
NBAS	155.429	96.4185	4617.47	4206.54	0.620338	0.911004	0.786235	0.976314
WRNIP1	184.314	114.357	768.891	706.322	0.620446	0.918623	0.786371	0.98448
RREB1	92.1569	57.1784	2748.2	2607.78	0.620446	0.948905	0.786371	1.01693
SNRPB2	92.1569	57.1784	338.367	329.617	0.620446	0.974139	0.786371	1.04398
ARMC8	121.042	75.1167	2109.98	1891.37	0.620584	0.896393	0.786546	0.960656
ZNF23	270.969	168.172	397.513	414.824	0.620631	1.04355	0.786606	1.11836
CYFIP1	149.927	93.0551	1885.78	1836.44	0.620669	0.973835	0.786654	1.04365
C6orf226	178.812	110.993	74.2757	60.5418	0.620727	0.815096	0.786727	0.873531
MRE11	86.655	53.815	894.06	811.709	0.621025	0.907891	0.787106	0.972979
BPNT1	115.54	71.7533	240.708	195.079	0.621025	0.810438	0.787106	0.868539
SOCS2	57.77	35.8766	552.942	482.092	0.621025	0.871869	0.787106	0.934374
COX7C	202.195	125.568	244.835	250.015	0.621025	1.02116	0.787106	1.09437
MRPL42	144.425	89.6916	1013.73	872.251	0.621025	0.86044	0.787106	0.922126
DNAJC30	144.425	89.6916	148.551	145.749	0.621025	0.981134	0.787106	1.05147
LAMTOR2	254.463	158.081	176.061	140.143	0.621235	0.795992	0.787371	0.853057
PCNX3	225.578	140.143	1180.16	1192.9	0.621262	1.01079	0.787405	1.08326
SNRNP27	167.808	104.267	292.976	228.714	0.621344	0.780655	0.787509	0.836621
VPS36	167.808	104.267	965.585	893.553	0.621344	0.925401	0.787509	0.991744
XPO7	110.038	68.3899	1888.53	1782.62	0.621511	0.94392	0.78772	1.01159
BNC2	81.1531	50.4515	6596.79	6347.92	0.621683	0.962275	0.787939	1.03126
SEPHS2	591.455	367.736	420.896	355.403	0.621748	0.844397	0.788021	0.904932
API5	214.574	133.416	1105.88	1076.3	0.621772	0.973249	0.788052	1.04302
TMEM33	133.421	82.9648	887.182	725.381	0.621826	0.817623	0.78812	0.876239
NUCKS1	156.804	97.5396	2174.63	1962	0.622047	0.902225	0.7884	0.966906
INPP5B	104.536	65.0264	2253.03	2116.72	0.622047	0.9395	0.7884	1.00685
ZNF846	180.187	112.115	371.379	324.011	0.622211	0.872455	0.788608	0.935001
MAU2	255.839	159.203	1753.73	1830.83	0.622278	1.04396	0.788692	1.1188
ZNF395	151.302	94.1762	1048.11	954.095	0.622437	0.910297	0.788894	0.975557
DEPDC1	75.6512	47.0881	235.206	218.623	0.622437	0.929495	0.788894	0.996132
UBXN1	226.954	141.264	173.31	164.808	0.622437	0.950945	0.788894	1.01912
DHX38	75.6512	47.0881	537.811	515.727	0.622437	0.958936	0.788894	1.02768
ZBTB38	75.6512	47.0881	2535	2645.9	0.622437	1.04375	0.788894	1.11857
PLAC9	75.6512	47.0881	118.291	125.568	0.622437	1.06152	0.788894	1.13762
NAF1	99.0343	61.663	1248.93	1038.18	0.622643	0.831254	0.789155	0.890847
ZBTB41	221.452	137.901	702.868	607.661	0.622713	0.864544	0.789244	0.926524
TPGS1	122.417	76.2379	496.547	427.156	0.62277	0.860254	0.789316	0.921926
PPWD1	169.184	105.388	558.443	498.91	0.622919	0.893393	0.789505	0.957441
GBA2	169.184	105.388	656.102	630.084	0.622919	0.960344	0.789505	1.02919
SNRPC	239.333	149.112	374.13	340.828	0.623033	0.91099	0.78965	0.976299
PDK1	116.916	72.8744	960.083	924.945	0.623309	0.963401	0.789999	1.03247
STAG1	116.916	72.8744	7511.48	7293.05	0.623309	0.970921	0.789999	1.04053
STAT5A	70.1493	43.7247	240.708	210.775	0.623309	0.875646	0.789999	0.938422
SLC9A8	140.299	87.4493	2222.77	2060.67	0.623309	0.927071	0.789999	0.993533
CHAF1B	93.5324	58.2996	621.715	609.903	0.623309	0.981	0.789999	1.05133
SLC25A20	70.1493	43.7247	258.59	260.106	0.623309	1.00586	0.789999	1.07797
ELP4	158.18	98.6608	1277.82	1181.69	0.623726	0.92477	0.790528	0.991067
TAF2	134.797	84.0859	1682.21	1491.12	0.623798	0.886408	0.790619	0.949956
TMEM216	134.797	84.0859	104.536	94.1762	0.623798	0.900896	0.790619	0.965481
EIF3K	134.797	84.0859	779.895	718.654	0.623798	0.921475	0.790619	0.987537
PID1	222.827	139.022	6811.36	6835.62	0.623901	1.00356	0.79075	1.07551
AHCYL1	199.444	124.447	1598.3	1399.19	0.62397	0.875421	0.790837	0.938181
EML3	88.0305	54.9361	284.724	227.592	0.624058	0.799345	0.790949	0.856651
RGS9BP	88.0305	54.9361	71.5248	67.2687	0.624058	0.940495	0.790949	1.00792
FAM204A	152.678	95.2974	1189.79	1118.9	0.624173	0.940423	0.791094	1.00784
SERAC1	217.325	135.659	524.057	487.698	0.624219	0.930621	0.791153	0.997338
ZNF668	64.6474	40.3612	621.715	515.727	0.624329	0.829522	0.791292	0.888991
TMEM206	129.295	80.7225	423.647	401.37	0.624329	0.947417	0.791292	1.01534
SPACA9	129.295	80.7225	173.31	171.535	0.624329	0.989759	0.791292	1.06072
ZNF692	64.6474	40.3612	349.371	369.978	0.624329	1.05898	0.791292	1.1349
AZIN1	235.206	146.87	1866.52	1685.08	0.62443	0.902792	0.791421	0.967514
ZNF140	105.912	66.1476	759.263	713.048	0.624554	0.939132	0.791578	1.00646
TCOF1	147.176	91.9339	1149.9	1120.02	0.624653	0.97402	0.791703	1.04385
EP400	147.176	91.9339	3539.1	3467.7	0.624653	0.979826	0.791703	1.05007
SLC30A9	188.44	117.72	1966.93	1874.55	0.624709	0.953035	0.791774	1.02136
TRAF3IP2	41.2643	25.7863	1281.94	1092	0.624907	0.851828	0.792025	0.912896
AC025165.3	82.5286	51.5727	845.918	767.985	0.624907	0.907871	0.792025	0.972957
TBL2	412.643	257.863	646.474	643.537	0.624907	0.995458	0.792025	1.06682
UQCC2	306.731	191.716	1030.23	917.097	0.625029	0.890185	0.792179	0.954003
CMC4	141.674	88.5705	85.2795	77.359	0.625171	0.907123	0.792359	0.972155
MTCP1	141.674	88.5705	85.2795	77.359	0.625171	0.907123	0.792359	0.972155
ADAMTS5	100.41	62.7841	389.26	321.769	0.625279	0.826617	0.792497	0.885877
GTF2H2	200.82	125.568	792.274	716.412	0.625279	0.904247	0.792497	0.969073
NAA15	100.41	62.7841	4078.29	3704.26	0.625279	0.908289	0.792497	0.973405
OARD1	200.82	125.568	572.198	534.786	0.625279	0.934617	0.792497	1.00162
SPRED2	200.82	125.568	3517.09	3324.2	0.625279	0.945154	0.792497	1.01291
UFC1	118.291	73.9956	198.069	140.143	0.625539	0.707549	0.792826	0.758273
SENP8	118.291	73.9956	244.835	179.383	0.625539	0.73267	0.792826	0.785196
PPIP5K1	59.1455	36.9978	411.267	381.189	0.625539	0.926865	0.792826	0.993313
ORC3	118.291	73.9956	1105.88	1028.09	0.625539	0.929655	0.792826	0.996303
POLR3F	118.291	73.9956	272.344	267.954	0.625539	0.983878	0.792826	1.05441
L1CAM	59.1455	36.9978	316.36	343.07	0.625539	1.08443	0.792826	1.16218
SPATS2L	177.436	110.993	5808.64	5718.96	0.625539	0.984562	0.792826	1.05515
SAP30BP	136.172	85.207	1735.85	1660.42	0.62573	0.956543	0.793068	1.02512
CZIB	213.199	133.416	387.884	300.467	0.625783	0.77463	0.793136	0.830164
FNDC10	77.0267	48.2092	59.1455	54.9361	0.625877	0.92883	0.793255	0.995419
CEP19	77.0267	48.2092	122.417	114.357	0.625877	0.934155	0.793255	1.00113
ZBTB22	77.0267	48.2092	276.471	269.075	0.625877	0.973249	0.793255	1.04302
ARMC6	77.0267	48.2092	639.597	650.264	0.625877	1.01668	0.793255	1.08957
RHBDF1	171.935	107.63	815.658	804.982	0.625994	0.986912	0.793402	1.05766
COPS4	94.9079	59.4207	510.302	415.945	0.626088	0.815096	0.793522	0.873531
SZT2	207.697	130.053	3874.72	3571.97	0.626166	0.921866	0.793621	0.987955
BAG6	207.697	130.053	621.715	656.991	0.626166	1.05674	0.793621	1.1325
TMEM121	130.67	81.8436	93.5324	69.511	0.626337	0.743176	0.793837	0.796455
MKRN1	130.67	81.8436	744.133	755.652	0.626337	1.01548	0.793837	1.08828
CINP	148.551	93.0551	528.183	440.61	0.626416	0.8342	0.793938	0.894004
TMEM141	148.551	93.0551	60.521	61.663	0.626416	1.01887	0.793938	1.09191
USP3	184.314	115.478	2302.55	2011.33	0.626529	0.873526	0.794081	0.936149
MRPS7	184.314	115.478	181.563	179.383	0.626529	0.987995	0.794081	1.05883
VPS13D	220.076	137.901	5213.06	5001.43	0.626605	0.959404	0.794177	1.02818
HSPA13	232.456	145.749	957.332	801.619	0.626997	0.837347	0.794674	0.897377
COA1	89.406	56.0573	2232.4	1921.64	0.626997	0.860798	0.794674	0.922509
DTL	53.6436	33.6344	894.06	801.619	0.626997	0.896606	0.794674	0.960884
MEAF6	178.812	112.115	429.149	409.218	0.626997	0.953558	0.794674	1.02192
UTP3	250.337	156.96	100.41	110.993	0.626997	1.1054	0.794674	1.18465
WDR13	71.5248	44.8458	481.417	417.066	0.626997	0.866331	0.794674	0.928438
ORAI2	143.05	89.6916	506.175	488.819	0.626997	0.965711	0.794674	1.03494
SRRM1	244.835	153.597	1562.54	1457.49	0.627349	0.932768	0.79512	0.999639
CYB5D2	226.954	142.385	610.712	500.031	0.627377	0.818768	0.795155	0.877466
PAPSS1	191.191	119.963	1298.45	1239.99	0.627448	0.954975	0.795246	1.02344
SLC16A13	155.429	97.5396	169.184	158.081	0.627552	0.934378	0.795377	1.00136
TMUB1	101.785	63.9053	121.042	116.599	0.627844	0.963295	0.795748	1.03235
AURKAIP1	203.571	127.811	148.551	146.87	0.627844	0.988681	0.795748	1.05956
TARBP2	83.9041	52.6938	258.59	210.775	0.628025	0.815096	0.795977	0.873531
ST5	149.927	94.1762	2683.55	2521.46	0.628147	0.939595	0.796132	1.00696
WDR48	215.95	135.659	810.156	760.137	0.628195	0.93826	0.796192	1.00552
AL445524.2	66.0229	41.4824	1485.51	1291.56	0.628303	0.869436	0.796329	0.931766
UCK2	132.046	82.9648	1997.19	2006.85	0.628303	1.00484	0.796329	1.07687
KIF1BP	228.329	143.507	774.393	653.628	0.628508	0.844051	0.796589	0.904562
TMEM232	48.1417	30.2709	324.612	304.952	0.628788	0.939433	0.796944	1.00678
LRRC8D	144.425	90.8128	3186.98	2945.25	0.628788	0.924151	0.796944	0.990404
SGF29	144.425	90.8128	418.145	386.795	0.628788	0.925027	0.796944	0.991342
ZNF506	174.686	109.872	727.627	692.868	0.628972	0.952229	0.797177	1.0205
NDUFS5	301.229	189.474	286.099	289.255	0.629001	1.01103	0.797214	1.08351
MINDY4	78.4022	49.3304	1363.1	1372.28	0.629197	1.00674	0.797462	1.07891
MTX2	187.065	117.72	951.83	858.797	0.629302	0.902259	0.797595	0.966943
GCA	108.663	68.3899	639.597	552.725	0.629378	0.864177	0.797692	0.92613
TOMM40	217.325	136.78	561.194	517.969	0.629378	0.922976	0.797692	0.989145
ZSCAN25	217.325	136.78	594.206	549.361	0.629378	0.92453	0.797692	0.99081
RRP15	138.923	87.4493	1035.73	874.493	0.62948	0.844322	0.797821	0.904853
XPR1	308.107	193.958	2144.37	1899.22	0.629516	0.885678	0.797867	0.949173
APAF1	169.184	106.509	1015.1	909.249	0.629546	0.895722	0.797904	0.959937
TMEM11	169.184	106.509	646.474	589.722	0.629546	0.912214	0.797904	0.977611
NDUFB4	199.444	125.568	334.241	250.015	0.629591	0.74801	0.797962	0.801635
LPIN3	151.302	95.2974	248.961	260.106	0.629847	1.04476	0.798286	1.11966
FAM180A	60.521	38.1189	412.643	384.553	0.629847	0.931926	0.798286	0.998737
SLC29A1	60.521	38.1189	88.0305	85.207	0.629847	0.967926	0.798286	1.03732
SSBP4	90.7814	57.1784	749.635	732.108	0.629847	0.97662	0.798286	1.04663
GPATCH1	181.563	114.357	639.597	630.084	0.629847	0.985127	0.798286	1.05575
SYNGR1	90.7814	57.1784	467.662	467.518	0.629847	0.999691	0.798286	1.07136
SMCR8	193.942	122.205	972.462	861.04	0.63011	0.885422	0.798619	0.948899
CSTF2T	163.682	103.145	215.95	221.987	0.630158	1.02796	0.798681	1.10165
DIPK2A	297.103	187.231	683.612	608.782	0.63019	0.890537	0.798721	0.954381
XPNPEP3	133.421	84.0859	1455.25	1296.04	0.630229	0.890596	0.79877	0.954444
DNAJC15	133.421	84.0859	1257.19	1248.96	0.630229	0.993454	0.79877	1.06468
DCTN3	103.161	65.0264	127.919	131.174	0.630341	1.02544	0.798912	1.09896
SDCCAG8	279.222	176.02	2955.9	2759.14	0.630394	0.933435	0.79898	1.00035
FRG1	72.9003	45.967	429.149	338.586	0.630546	0.788971	0.799172	0.845533
ZNF485	145.801	91.9339	166.433	137.901	0.630546	0.828569	0.799172	0.887969
EYA3	115.54	72.8744	1750.98	1688.44	0.630729	0.964285	0.799404	1.03342
DDX5	790.899	498.91	1584.55	1613.33	0.630813	1.01816	0.799511	1.09116
RASGRF2	42.6398	26.9075	1371.35	1248.96	0.631042	0.910749	0.799801	0.976041
BRF2	85.2795	53.815	463.536	467.518	0.631042	1.00859	0.799801	1.0809
AC093827.5	127.919	80.7225	566.696	424.914	0.631042	0.749809	0.799801	0.803564
APEX2	127.919	80.7225	254.463	228.714	0.631042	0.898808	0.799801	0.963245
STAT6	255.839	161.445	1165.03	1052.76	0.631042	0.903631	0.799801	0.968413
TIMM22	310.858	196.2	426.398	312.8	0.631158	0.733586	0.799948	0.786178
SLC41A3	182.938	115.478	599.708	545.998	0.63124	0.91044	0.800051	0.97571
CSE1L	182.938	115.478	1482.76	1473.18	0.63124	0.99354	0.800051	1.06477
FOXP3	140.299	88.5705	82.5286	69.511	0.6313	0.842266	0.800127	0.902648
ZNF521	140.299	88.5705	4078.29	3903.83	0.6313	0.957222	0.800127	1.02585
ZNF396	97.6588	61.663	140.299	100.903	0.631412	0.719202	0.80027	0.770762
C10orf143	97.6588	61.663	701.493	605.418	0.631412	0.863043	0.80027	0.924915
UBE2G1	262.716	165.93	2653.29	2376.83	0.631593	0.895803	0.800499	0.960023
DNAJC28	55.0191	34.7555	104.536	93.0551	0.631699	0.890171	0.800634	0.953988
SLC25A44	232.456	146.87	451.156	368.857	0.63182	0.817581	0.800787	0.876194
HOXA9	122.417	77.359	141.674	98.6608	0.631928	0.696393	0.800924	0.746318
SON	367.252	232.077	2605.15	2431.76	0.631928	0.933444	0.800924	1.00036
AGPAT3	122.417	77.359	2998.54	2849.95	0.631928	0.950447	0.800924	1.01858
ANKRD13C	257.214	162.566	1876.15	1685.08	0.632026	0.898159	0.801048	0.962549
RAB3IP	67.3983	42.6035	550.191	491.062	0.632115	0.89253	0.801161	0.956516
NDUFS7	147.176	93.0551	587.328	532.544	0.632271	0.906723	0.801358	0.971726
CDC16	226.954	143.507	1723.47	1581.94	0.632317	0.917877	0.801417	0.983681
PIGBOS1	79.7776	50.4515	83.9041	73.9956	0.632402	0.881907	0.801524	0.945132
NSD1	159.555	100.903	4666.99	4489.07	0.632402	0.961876	0.801524	1.03083
CHCHD4	79.7776	50.4515	602.459	580.753	0.632402	0.963972	0.801524	1.03308
CPQ	79.7776	50.4515	2466.23	2403.74	0.632402	0.97466	0.801524	1.04453
LPAR1	79.7776	50.4515	5350.6	5236.87	0.632402	0.978744	0.801524	1.04891
POFUT2	159.555	100.903	561.194	571.784	0.632402	1.01887	0.801524	1.09191
MED10	171.935	108.751	379.632	367.736	0.632514	0.968665	0.801667	1.03811
RFX8	92.1569	58.2996	2430.47	2231.08	0.632612	0.917963	0.80179	0.983773
ZMYM1	92.1569	58.2996	734.504	698.474	0.632612	0.950945	0.80179	1.01912
RFXANK	104.536	66.1476	171.935	135.659	0.632772	0.789013	0.801993	0.845578
FAM86B1	104.536	66.1476	357.624	348.676	0.632772	0.97498	0.801993	1.04488
NKIRAS2	221.452	140.143	419.52	414.824	0.632838	0.988805	0.802078	1.05969
USP16	116.916	73.9956	484.168	440.61	0.632898	0.910036	0.802153	0.975277
ZNHIT6	116.916	73.9956	1041.24	968.67	0.632898	0.930308	0.802153	0.997002
SERPINB6	166.433	105.388	730.378	698.474	0.633215	0.956318	0.802555	1.02488
DNAJC19	178.812	113.236	229.705	195.079	0.633267	0.849262	0.802621	0.910146
METTL15	191.191	121.084	3380.92	3167.24	0.633312	0.936797	0.802678	1.00396
C18orf25	203.571	128.932	1957.3	1679.48	0.633352	0.858056	0.802728	0.919571
CYB5B	203.571	128.932	1521.28	1361.07	0.633352	0.894689	0.802728	0.95883
TBC1D15	203.571	128.932	2727.57	2519.21	0.633352	0.923611	0.802728	0.989825
TMEM131	228.329	144.628	3921.48	3726.69	0.633418	0.950326	0.802812	1.01846
LSM14A	253.088	160.324	2101.73	1983.31	0.633471	0.943655	0.80288	1.01131
LENG8	277.846	176.02	900.937	904.764	0.633515	1.00425	0.802935	1.07624
RCC1L	290.226	183.868	1185.66	1293.8	0.633534	1.09121	0.80296	1.16944
IPP	327.363	207.412	557.068	494.425	0.633583	0.887549	0.803021	0.951178
FAM227B	173.31	109.872	510.302	377.826	0.633964	0.740397	0.803504	0.793477
DCLRE1C	136.172	86.3282	1280.57	1132.36	0.633964	0.884261	0.803504	0.947654
DNMT3A	99.0343	62.7841	2742.7	2519.21	0.633964	0.918516	0.803504	0.984365
ADA	198.069	125.568	294.352	292.619	0.633964	0.994112	0.803504	1.06538
ATXN7L2	222.827	141.264	281.973	215.26	0.633964	0.763407	0.803504	0.818136
MST1	185.689	117.72	137.548	115.478	0.633964	0.839549	0.803504	0.899737
NAA16	210.448	133.416	1565.29	1368.92	0.633964	0.874545	0.803504	0.937242
ABCF2	210.448	133.416	847.294	747.804	0.633964	0.88258	0.803504	0.945852
TTLL4	111.414	70.6322	576.325	530.302	0.633964	0.920144	0.803504	0.98611
DENND2A	61.8964	39.2401	1288.82	1188.41	0.633964	0.922094	0.803504	0.988199
DHX58	222.827	141.264	631.344	587.48	0.633964	0.930523	0.803504	0.997233
FUT8	160.931	102.024	3164.97	3004.67	0.633964	0.949351	0.803504	1.01741
TFG	123.793	78.4802	1587.3	1516.91	0.633964	0.955654	0.803504	1.02417
CXorf56	61.8964	39.2401	180.187	178.262	0.633964	0.989315	0.803504	1.06024
ASPH	254.463	161.445	6246.04	6094.55	0.634453	0.975746	0.804124	1.0457
ADAM9	229.705	145.749	3024.67	2854.44	0.634506	0.943717	0.804191	1.01137
NF1	167.808	106.509	5108.52	4596.7	0.634706	0.89981	0.804444	0.964318
ZFP3	155.429	98.6608	646.474	591.965	0.634765	0.915682	0.804519	0.981328
IFI44	143.05	90.8128	914.692	965.306	0.634834	1.05533	0.804607	1.13099
ZDHHC21	118.291	75.1167	829.412	809.467	0.635017	0.975952	0.804838	1.04592
ADK	105.912	67.2687	6969.54	6298.59	0.63514	0.903732	0.804994	0.968521
HIKESHI	105.912	67.2687	574.949	526.938	0.63514	0.916495	0.804994	0.9822
C17orf75	105.912	67.2687	381.007	362.13	0.63514	0.950455	0.804994	1.01859
DOCK7	187.065	118.841	3602.37	3463.22	0.635295	0.961371	0.805192	1.03029
MUL1	187.065	118.841	280.597	287.013	0.635295	1.02287	0.805192	1.0962
VAPB	174.686	110.993	1680.83	1586.42	0.63539	0.94383	0.805311	1.01149
FBXL8	81.1531	51.5727	155.429	116.599	0.635499	0.750177	0.805449	0.803958
FNBP4	243.459	154.718	4755.02	4302.96	0.635499	0.904929	0.805449	0.969804
SPATA20	218.701	139.022	156.804	171.535	0.635672	1.09394	0.805669	1.17237
NBPF15	137.548	87.4493	891.309	825.163	0.635775	0.925788	0.805799	0.992158
COMMD2	262.716	167.051	331.49	274.681	0.63586	0.828624	0.805907	0.888029
VPS72	125.168	79.6013	552.942	501.152	0.635954	0.906338	0.806026	0.971314
PRMT7	125.168	79.6013	818.409	766.863	0.635954	0.937018	0.806026	1.00419
PPP5C	125.168	79.6013	826.661	834.132	0.635954	1.00904	0.806026	1.08138
MANBAL	350.747	223.108	786.773	681.656	0.636094	0.866396	0.806204	0.928508
METTL6	112.789	71.7533	866.55	806.103	0.636172	0.930244	0.806303	0.996934
RHOD	56.3945	35.8766	116.916	132.295	0.636172	1.13154	0.806303	1.21267
TMEM60	112.789	71.7533	129.295	186.11	0.636172	1.43942	0.806303	1.54262
AL096870.1	156.804	99.7819	246.21	206.291	0.636347	0.837864	0.806524	0.897931
PTPRG	100.41	63.9053	7043.82	6784.05	0.636445	0.963122	0.806648	1.03217
TOPORS	200.82	127.811	635.47	633.447	0.636445	0.996816	0.806648	1.06828
PHYKPL	144.425	91.9339	2273.66	1937.34	0.636551	0.852079	0.806783	0.913165
EAF1	144.425	91.9339	672.608	575.148	0.636551	0.855101	0.806783	0.916403
CENPV	144.425	91.9339	163.682	161.445	0.636551	0.986335	0.806783	1.05705
TMEM259	251.712	160.324	737.255	636.811	0.636933	0.863758	0.807267	0.925682
PJA2	119.666	76.2379	1532.28	1435.07	0.637086	0.936555	0.807462	1.0037
RTL5	119.666	76.2379	136.172	134.537	0.637086	0.987995	0.807462	1.05883
PPIL1	119.666	76.2379	279.222	282.529	0.637086	1.01184	0.807462	1.08438
MRPL44	151.302	96.4185	302.605	230.956	0.637257	0.763226	0.807678	0.817942
HOXA13	75.6512	48.2092	204.946	184.989	0.637257	0.902623	0.807678	0.967333
DFFA	138.923	88.5705	565.321	528.059	0.63755	0.934088	0.80805	1.00105
SIPA1L3	202.195	128.932	4554.2	4462.16	0.63766	0.979789	0.808189	1.05003
RAB4B	94.9079	60.5418	276.471	238.804	0.637901	0.863758	0.808494	0.925682
NDUFAF2	189.816	121.084	3052.18	2669.45	0.637901	0.874603	0.808494	0.937304
ACAD11	94.9079	60.5418	855.546	748.925	0.637901	0.875376	0.808494	0.938133
VAMP4	189.816	121.084	605.21	543.755	0.637901	0.898458	0.808494	0.962869
PPP1R3F	94.9079	60.5418	1059.12	963.064	0.637901	0.909308	0.808494	0.974497
RAB4B-EGLN2	94.9079	60.5418	1617.56	1495.61	0.637901	0.924607	0.808494	0.990893
RPAIN	189.816	121.084	690.489	662.597	0.637901	0.959605	0.808494	1.0284
EMC2	126.544	80.7225	762.014	615.509	0.637901	0.807739	0.808494	0.865647
EDEM3	221.452	141.264	1412.61	1190.66	0.637901	0.842874	0.808494	0.903301
SLTM	411.267	262.348	2371.32	2204.17	0.637901	0.929512	0.808494	0.996149
MAP3K8	158.18	100.903	471.788	446.216	0.637901	0.945796	0.808494	1.0136
RPS11	316.36	201.806	524.057	498.91	0.637901	0.952015	0.808494	1.02027
MINDY2	126.544	80.7225	942.201	979.881	0.637901	1.03999	0.808494	1.11455
CCZ1	367.252	234.319	1121.01	1000.06	0.638034	0.892105	0.808662	0.956061
POLR2K	114.165	72.8744	86.655	70.6322	0.638328	0.815096	0.809035	0.873531
HLA-F	114.165	72.8744	678.11	650.264	0.638328	0.958936	0.809035	1.02768
GPALPP1	82.5286	52.6938	895.435	750.046	0.638492	0.837633	0.809243	0.897684
MAP3K20	82.5286	52.6938	3840.33	3534.97	0.638492	0.920486	0.809243	0.986477
ANKS1A	82.5286	52.6938	2019.2	1885.77	0.638492	0.933918	0.809243	1.00087
SCAP	82.5286	52.6938	1276.44	1207.47	0.638492	0.945968	0.809243	1.01379
ZNF691	165.057	105.388	211.823	204.048	0.638492	0.963295	0.809243	1.03235
MAMLD1	82.5286	52.6938	1404.36	1490	0.638492	1.06098	0.809243	1.13704
DET1	133.421	85.207	734.504	668.203	0.638632	0.909733	0.80942	0.974952
AC013489.1	133.421	85.207	1284.7	1218.68	0.638632	0.948618	0.80942	1.01663
MED16	184.314	117.72	873.428	847.586	0.638695	0.970413	0.8095	1.03998
ANKRD40	286.099	182.747	774.393	658.112	0.638753	0.849842	0.809574	0.910768
IBA57	101.785	65.0264	444.279	309.436	0.638859	0.696491	0.809708	0.746423
TMEM56	50.8926	32.5132	290.226	257.863	0.638859	0.888493	0.809708	0.95219
TMEM56-RWDD3	50.8926	32.5132	786.773	705.2	0.638859	0.896321	0.809708	0.960578
RSU1	171.935	109.872	2319.05	2199.69	0.639035	0.948528	0.809932	1.01653
UFSP2	70.1493	44.8458	389.26	306.073	0.639291	0.786294	0.810256	0.842664
IFI16	140.299	89.6916	3127.83	2832.01	0.639291	0.905423	0.810256	0.970334
ZSCAN30	70.1493	44.8458	705.619	660.355	0.639291	0.935851	0.810256	1.00294
TRIO	140.299	89.6916	14328.3	13911.2	0.639291	0.970885	0.810256	1.04049
SIRT5	280.597	179.383	576.325	591.965	0.639291	1.02714	0.810256	1.10077
ADGRE3	70.1493	44.8458	70.1493	79.6013	0.639291	1.13474	0.810256	1.21609
UBE2F-SCLY	248.961	159.203	3440.07	3123.51	0.639468	0.90798	0.81048	0.973073
UBE2F	248.961	159.203	1475.89	1374.52	0.639468	0.931321	0.81048	0.998088
OPLAH	338.367	216.381	332.865	299.346	0.639486	0.8993	0.810503	0.963772
AARSD1	178.812	114.357	319.111	287.013	0.639537	0.899416	0.810567	0.963896
DHX32	178.812	114.357	1358.97	1238.87	0.639537	0.91162	0.810567	0.976975
CCDC15	89.406	57.1784	387.884	367.736	0.639537	0.948055	0.810567	1.01602
AC022966.1	306.731	196.2	3031.55	2843.22	0.639649	0.937878	0.81071	1.00512
ZNF473	108.663	69.511	826.661	719.775	0.639696	0.870701	0.810769	0.933123
PHF5A	108.663	69.511	408.517	385.674	0.639696	0.944084	0.810769	1.01177
TMEM209	255.839	163.687	617.589	616.63	0.639806	0.998447	0.810909	1.07003
SART1	147.176	94.1762	706.995	597.57	0.639888	0.845226	0.811013	0.905821
C14orf119	294.352	188.352	579.076	493.304	0.639888	0.851882	0.811013	0.912954
HOXC6	147.176	94.1762	231.08	200.685	0.639888	0.868465	0.811013	0.930726
HOXC4	147.176	94.1762	415.394	371.099	0.639888	0.893367	0.811013	0.957413
FAM207A	147.176	94.1762	708.37	677.172	0.639888	0.955957	0.811013	1.02449
LCMT2	166.433	106.509	698.742	670.445	0.639951	0.959503	0.811093	1.02829
GPT2	224.203	143.507	2277.79	2200.81	0.640075	0.966204	0.81125	1.03547
TWISTNB	339.743	217.502	189.816	177.141	0.640197	0.933226	0.811404	1.00013
WRAP53	385.133	246.652	649.225	530.302	0.640433	0.816823	0.811703	0.875381
TBC1D23	192.567	123.326	1778.49	1525.88	0.640433	0.857963	0.811703	0.919471
MARCKS	231.08	147.991	896.811	781.438	0.640433	0.871353	0.811703	0.93382
FBXO8	115.54	73.9956	488.294	477.608	0.640433	0.978115	0.811703	1.04824
MICU2	154.053	98.6608	1246.18	1100.96	0.640433	0.88347	0.811703	0.946807
CPE	38.5133	24.6652	138.923	160.324	0.640433	1.15405	0.811703	1.23678
AKTIP	237.957	152.476	225.578	255.621	0.640769	1.13318	0.812129	1.21442
AC010618.1	199.444	127.811	779.895	716.412	0.640834	0.9186	0.812211	0.984455
SPG7	199.444	127.811	2451.1	2263.59	0.640834	0.923501	0.812211	0.989707
RBM7	160.931	103.145	867.926	718.654	0.64093	0.828013	0.812333	0.887374
FBXW11	160.931	103.145	3407.06	3205.35	0.64093	0.940799	0.812333	1.00825
NDUFA13	283.348	181.626	521.306	473.123	0.640998	0.907574	0.812419	0.972638
AC011448.1	283.348	181.626	1298.45	1265.77	0.640998	0.974834	0.812419	1.04472
TRMT2A	103.161	66.1476	316.36	280.286	0.641209	0.885974	0.812686	0.94949
WDR12	103.161	66.1476	623.091	595.328	0.641209	0.955444	0.812686	1.02394
ARF4	496.547	318.405	1810.13	1669.39	0.641239	0.922248	0.812725	0.988364
GANC	270.969	173.778	867.926	736.592	0.641319	0.848681	0.812826	0.909524
SPHK2	83.9041	53.815	840.416	797.134	0.641387	0.9485	0.812912	1.0165
BARD1	83.9041	53.815	1149.9	1092	0.641387	0.949645	0.812912	1.01773
PCDHGC3	83.9041	53.815	962.834	1015.76	0.641387	1.05497	0.812912	1.1306
GTPBP10	148.551	95.2974	812.907	698.474	0.641511	0.85923	0.813069	0.920829
PFDN1	148.551	95.2974	1016.48	931.672	0.641511	0.916569	0.813069	0.982279
NAB2	213.199	136.78	1141.65	1133.48	0.641559	0.992846	0.813131	1.06402
TIMM23B	193.942	124.447	808.78	730.987	0.641671	0.903814	0.813273	0.968609
SERHL2	64.6474	41.4824	68.7738	57.1784	0.641671	0.831398	0.813273	0.891001
HEATR1	129.295	82.9648	1430.5	1477.67	0.641671	1.03298	0.813273	1.10703
SNRPD3	174.686	112.115	1303.95	1191.78	0.641808	0.913974	0.813446	0.979497
TM9SF3	284.724	182.747	2226.9	2055.06	0.641839	0.922836	0.813485	0.988994
FAAP24	110.038	70.6322	96.2834	70.6322	0.641888	0.733586	0.813547	0.786178
EAPP	265.467	170.414	632.719	562.815	0.641941	0.889518	0.813614	0.953288
MTRNR2L8	155.429	99.7819	246.21	198.443	0.641978	0.805989	0.813662	0.863771
SF3B6	200.82	128.932	403.015	329.617	0.642028	0.817878	0.813724	0.876512
ZNF384	90.7814	58.2996	753.761	670.445	0.642197	0.889466	0.813939	0.953232
RBM26	136.172	87.4493	2466.23	2250.14	0.642197	0.91238	0.813939	0.977789
SINHCAF	136.172	87.4493	855.546	781.438	0.642197	0.913379	0.813939	0.97886
LRRC1	90.7814	58.2996	601.083	581.874	0.642197	0.968043	0.813939	1.03744
PAMR1	499.298	320.648	2203.51	2108.87	0.642197	0.957051	0.813939	1.02566
RPL35A	253.088	162.566	870.677	779.196	0.642331	0.894932	0.814109	0.95909
BLOC1S6	162.306	104.267	778.52	673.808	0.642406	0.865499	0.814204	0.927548
AC090527.2	162.306	104.267	1689.09	1589.78	0.642406	0.94121	0.814204	1.00869
SPPL2A	233.831	150.233	1653.32	1466.46	0.642487	0.886976	0.814307	0.950564
BUD13	116.916	75.1167	430.524	382.311	0.642487	0.888012	0.814307	0.951674
CLN6	116.916	75.1167	737.255	654.749	0.642487	0.88809	0.814307	0.951757
IBTK	259.965	167.051	2052.21	1877.92	0.642589	0.915071	0.814436	0.980673
C10orf88	143.05	91.9339	469.037	402.491	0.642672	0.858122	0.814541	0.919641
SLC25A26	143.05	91.9339	1863.77	1792.71	0.642672	0.961873	0.814541	1.03083
POP4	214.574	137.901	438.777	435.004	0.642672	0.991402	0.814541	1.06248
SAMD4B	169.184	108.751	1413.99	1359.95	0.642799	0.961781	0.814702	1.03073
GAS6	169.184	108.751	2438.72	2537.15	0.642799	1.04036	0.814702	1.11495
CTC1	195.318	125.568	2437.34	1855.5	0.642893	0.761278	0.814821	0.815854
RBM18	97.6588	62.7841	618.964	537.029	0.642893	0.867624	0.814821	0.929825
TTC5	97.6588	62.7841	341.118	357.645	0.642893	1.04845	0.814821	1.12361
AGAP3	221.452	142.385	1950.43	1854.37	0.642964	0.950754	0.814911	1.01891
ZNF486	123.793	79.6013	716.623	709.685	0.64302	0.990318	0.814982	1.06131
SUMF1	123.793	79.6013	2177.38	2215.38	0.64302	1.01745	0.814982	1.0904
WBP4	149.927	96.4185	873.428	742.198	0.643103	0.849754	0.815087	0.910673
ZNF557	176.061	113.236	955.956	872.251	0.643162	0.912438	0.815162	0.977852
SNRNP200	176.061	113.236	1310.83	1219.81	0.643162	0.930561	0.815162	0.997273
SBNO2	489.67	315.042	2519.87	2606.66	0.643376	1.03444	0.815434	1.1086
GPSM3	156.804	100.903	133.421	107.63	0.643497	0.806693	0.815586	0.864525
PTPN4	78.4022	50.4515	2023.33	1785.98	0.643497	0.882697	0.815586	0.945979
DICER1	130.67	84.0859	1748.23	1576.33	0.643497	0.901672	0.815586	0.966313
ABCA1	156.804	100.903	2950.4	2732.23	0.643497	0.926055	0.815586	0.992445
GFM1	130.67	84.0859	932.573	945.125	0.643497	1.01346	0.815586	1.08612
CXADR	52.2681	33.6344	265.467	209.654	0.643497	0.789756	0.815586	0.846374
CEMIP2	491.045	316.163	1834.89	1605.48	0.643857	0.874976	0.816043	0.937703
RNF26	163.682	105.388	140.299	156.96	0.643857	1.11876	0.816043	1.19896
SLK	301.229	193.958	1738.6	1581.94	0.643889	0.90989	0.816083	0.97512
SNX9	334.241	215.26	6240.54	6203.3	0.644026	0.994033	0.816258	1.0653
ZNF550	111.414	71.7533	675.359	584.117	0.644026	0.864898	0.816258	0.926903
ATG10	222.827	143.507	1385.1	1336.41	0.644026	0.96484	0.816258	1.03401
AP3D1	196.693	126.689	2668.42	2773.71	0.644097	1.03946	0.816347	1.11398
KARS	367.252	236.562	920.194	794.892	0.644139	0.863831	0.816401	0.92576
ZNF383	85.2795	54.9361	656.102	538.15	0.644189	0.820222	0.816463	0.879025
LINS1	85.2795	54.9361	610.712	549.361	0.644189	0.899543	0.816463	0.964032
FRS2	255.839	164.808	2495.11	2293.86	0.644189	0.919342	0.816463	0.98525
COA7	255.839	164.808	482.792	466.396	0.644189	0.96604	0.816463	1.0353
IL5RA	314.984	202.927	71.5248	63.9053	0.644246	0.893471	0.816536	0.957524
SUOX	144.425	93.0551	357.624	294.861	0.644314	0.824501	0.816622	0.88361
TAB1	262.716	169.293	1032.98	886.826	0.644395	0.85851	0.816725	0.920057
AP3B1	262.716	169.293	3712.41	3417.25	0.644395	0.920494	0.816725	0.986485
LRRC37B	118.291	76.2379	1082.5	966.427	0.644494	0.892773	0.816851	0.956777
MICU3	118.291	76.2379	1017.85	912.612	0.644494	0.896606	0.816851	0.960884
POLR2M	177.436	114.357	658.853	602.055	0.644494	0.913792	0.816851	0.979303
EXOC1	151.302	97.5396	942.201	892.432	0.644667	0.947177	0.817069	1.01508
FRMD5	125.168	80.7225	1481.39	1377.89	0.644911	0.930133	0.817379	0.996815
TRIM66	500.673	322.89	848.669	796.013	0.644911	0.937955	0.817379	1.0052
ACO2	125.168	80.7225	2203.51	2127.93	0.644911	0.9657	0.817379	1.03493
VPS25	283.348	182.747	332.865	289.255	0.644955	0.868987	0.817434	0.931285
DCP1B	158.18	102.024	964.209	834.132	0.644989	0.865095	0.817478	0.927114
RAPH1	191.191	123.326	4045.28	3524.88	0.64504	0.871357	0.817542	0.933825
CCDC59	257.214	165.93	881.68	739.956	0.645103	0.839256	0.817622	0.899423
PTPRM	389.26	251.137	5694.47	5318.71	0.645164	0.934013	0.8177	1.00097
NKAPD1	99.0343	63.9053	386.509	315.042	0.645284	0.815096	0.817852	0.873531
CPSF1	231.08	149.112	440.152	440.61	0.645284	1.00104	0.817852	1.0728
THUMPD1	165.057	106.509	711.121	612.145	0.645284	0.860817	0.817852	0.92253
TRAPPC6B	237.957	153.597	386.509	364.372	0.645481	0.942727	0.818101	1.01031
UBR5	204.946	132.295	5233.69	4835.5	0.645512	0.923918	0.818141	0.990155
DIDO1	204.946	132.295	4539.07	4411.71	0.645512	0.97194	0.818141	1.04162
DPY19L4	376.881	243.289	1056.37	1024.73	0.645532	0.970049	0.818166	1.03959
RRM2	171.935	110.993	2444.22	2331.98	0.645556	0.95408	0.818196	1.02248
FANCL	138.923	89.6916	905.064	862.161	0.645621	0.952597	0.818278	1.02089
POLR2F	211.823	136.78	960.083	788.165	0.645725	0.820935	0.818411	0.879788
SRP54	105.912	68.3899	1292.95	1161.51	0.645725	0.89834	0.818411	0.962742
SCYL3	105.912	68.3899	957.332	875.614	0.645725	0.914641	0.818411	0.980212
MRPS2	211.823	136.78	218.701	210.775	0.645725	0.963761	0.818411	1.03285
ADAM10	178.812	115.478	4239.22	4086.57	0.645807	0.963992	0.818514	1.0331
INO80B	72.9003	47.0881	144.425	121.084	0.645925	0.838384	0.818664	0.898489
INO80B-WBP1	72.9003	47.0881	1327.33	1177.2	0.645925	0.886892	0.818664	0.950474
CDK11B	112.789	72.8744	803.278	774.711	0.646113	0.964437	0.818902	1.03358
RP9	192.567	124.447	418.145	335.222	0.646255	0.80169	0.819082	0.859163
CCNK	232.456	150.233	1360.35	1356.59	0.646289	0.997236	0.819125	1.06873
PRDX4	119.666	77.359	177.436	141.264	0.646455	0.79614	0.819336	0.853216
MTPAP	39.8888	25.7863	1079.75	922.703	0.646455	0.854553	0.819336	0.915816
CNTLN	239.333	154.718	2827.98	2738.96	0.646455	0.968521	0.819336	1.03796
AKAP7	79.7776	51.5727	1090.75	1105.45	0.646455	1.01347	0.819336	1.08613
CHD1	206.321	133.416	2328.68	2179.51	0.646643	0.93594	0.819574	1.00304
INTS12	206.321	133.416	400.264	395.764	0.646643	0.988759	0.819574	1.05964
HERC4	166.433	107.63	5721.98	5220.05	0.646688	0.91228	0.819631	0.977683
SEPHS1	126.544	81.8436	1336.96	1195.14	0.646761	0.893922	0.819723	0.958008
CYP2E1	86.655	56.0573	114.165	93.0551	0.646902	0.815096	0.819902	0.873531
PFDN6	86.655	56.0573	488.294	410.339	0.646902	0.840352	0.819902	0.900598
GIGYF1	173.31	112.115	1024.73	1000.06	0.646902	0.975927	0.819902	1.04589
NEMF	220.076	142.385	2100.35	1856.62	0.646982	0.883955	0.820004	0.947326
DTNBP1	133.421	86.3282	1672.58	1514.67	0.647035	0.905588	0.820071	0.97051
LINC02210-CRHR1	140.299	90.8128	828.037	726.502	0.647282	0.877379	0.820384	0.940279
SOS1	233.831	151.355	3312.15	2930.67	0.647282	0.884826	0.820384	0.94826
NRP1	46.7662	30.2709	3788.06	3460.98	0.647282	0.913653	0.820384	0.979154
BCCIP	187.065	121.084	1005.47	964.185	0.647282	0.958936	0.820384	1.02768
DKKL1	93.5324	60.5418	104.536	104.267	0.647282	0.99742	0.820384	1.06893
HPF1	193.942	125.568	347.996	295.982	0.647452	0.850535	0.820599	0.91151
KCTD10	147.176	95.2974	1174.66	1035.94	0.647506	0.881907	0.820668	0.945132
CARF	147.176	95.2974	733.129	678.293	0.647506	0.925203	0.820668	0.991531
RNF214	147.176	95.2974	928.447	863.282	0.647506	0.929813	0.820668	0.996472
PSMC4	147.176	95.2974	397.513	373.341	0.647506	0.939194	0.820668	1.00653
TNFRSF10B	469.037	303.83	2910.51	2625.72	0.647774	0.902152	0.821008	0.966828
SCO1	321.862	208.533	889.933	762.379	0.647897	0.85667	0.821163	0.918085
BMP1	53.6436	34.7555	704.244	652.507	0.647897	0.926535	0.821163	0.992959
ZSCAN29	160.931	104.267	464.911	432.762	0.647897	0.930849	0.821163	0.997582
GTPBP2	382.382	247.773	3651.89	3253.56	0.647972	0.890926	0.821258	0.954797
OXSR1	221.452	143.507	2561.14	2382.43	0.648027	0.930225	0.821328	0.996913
MTFR1L	167.808	108.751	577.7	484.335	0.648068	0.838384	0.82138	0.898489
BZW1	281.973	182.747	1702.84	1484.4	0.648101	0.871718	0.821421	0.934212
IFT27	114.165	73.9956	496.547	377.826	0.648149	0.760907	0.821482	0.815457
UFD1	174.686	113.236	1154.02	998.94	0.648226	0.865614	0.82158	0.927671
PSMD13	174.686	113.236	565.321	533.665	0.648226	0.944004	0.82158	1.01168
B3GNT10	356.248	230.956	265.467	193.958	0.6483	0.73063	0.821674	0.783009
PDP2	121.042	78.4802	346.62	293.74	0.648372	0.847441	0.821765	0.908195
NBPF12	181.563	117.72	2797.72	2529.3	0.648372	0.904059	0.821765	0.968872
ZSWIM8	242.084	156.96	1339.71	1229.9	0.648372	0.918029	0.821765	0.983843
LRRC47	181.563	117.72	811.531	788.165	0.648372	0.971208	0.821765	1.04083
TMX2-CTNND1	127.919	82.9648	3468.95	3133.6	0.648571	0.903328	0.822017	0.968088
SMC3	127.919	82.9648	1063.24	1003.43	0.648571	0.94374	0.822017	1.0114
TMX2	127.919	82.9648	616.213	598.692	0.648571	0.971565	0.822017	1.04122
LNPEP	262.716	170.414	1239.3	1216.44	0.648663	0.981553	0.822134	1.05192
GTF3C2	67.3983	43.7247	804.654	693.989	0.64875	0.862469	0.822244	0.9243
PSMC5	283.348	183.868	317.735	285.892	0.648911	0.899781	0.822449	0.964287
DOCK3	74.2757	48.2092	3704.16	3378.01	0.649058	0.911951	0.822635	0.977329
PLXND1	74.2757	48.2092	1397.48	1411.52	0.649058	1.01005	0.822635	1.08246
NPRL3	74.2757	48.2092	1290.2	1320.71	0.649058	1.02365	0.822635	1.09704
BAG5	229.705	149.112	324.612	283.65	0.649148	0.87381	0.822749	0.936455
CSNK2B	81.1531	52.6938	500.673	424.914	0.649314	0.848685	0.822959	0.909528
TAB2	81.1531	52.6938	2708.31	2446.34	0.649314	0.90327	0.822959	0.968026
SOCS7	81.1531	52.6938	1114.14	1024.73	0.649314	0.91975	0.822959	0.985688
PSD3	162.306	105.388	4173.2	4221.11	0.649314	1.01148	0.822959	1.084
SLC35C2	264.091	171.535	1686.33	1580.81	0.64953	0.937427	0.823232	1.00463
TNFAIP6	88.0305	57.1784	138.923	109.872	0.64953	0.790885	0.823232	0.847584
NCAPH2	88.0305	57.1784	345.245	299.346	0.64953	0.867054	0.823232	0.929214
POLDIP3	176.061	114.357	1220.05	1078.54	0.64953	0.884016	0.823232	0.947392
AFTPH	176.061	114.357	1368.6	1218.68	0.64953	0.890462	0.823232	0.954299
INSYN1	88.0305	57.1784	317.735	294.861	0.64953	0.92801	0.823232	0.994539
NDUFA2	176.061	114.357	347.996	337.465	0.64953	0.969739	0.823232	1.03926
PMM2	182.938	118.841	2152.62	2086.45	0.649625	0.969261	0.823354	1.03875
POFUT1	372.754	242.167	770.267	793.771	0.649671	1.03051	0.823411	1.10439
TRIM41	189.816	123.326	854.171	761.258	0.649714	0.891224	0.823466	0.955117
BICRA	94.9079	61.663	2422.21	2186.23	0.649714	0.902576	0.823466	0.967283
RNF19A	189.816	123.326	1529.53	1458.61	0.649714	0.953633	0.823466	1.022
LCN12	94.9079	61.663	57.77	60.5418	0.649714	1.04798	0.823466	1.12311
NMT2	305.356	198.443	788.148	722.018	0.649874	0.916094	0.823669	0.981769
B4GALT5	515.804	335.222	3683.53	3311.86	0.649903	0.899101	0.823706	0.963559
ATXN2L	217.325	141.264	2368.57	2161.57	0.650013	0.912605	0.823845	0.97803
NCAPD2	224.203	145.749	811.531	771.348	0.650077	0.950485	0.823926	1.01863
PUDP	115.54	75.1167	1346.59	1337.53	0.650136	0.993268	0.824001	1.06448
ALDH1B1	115.54	75.1167	121.042	132.295	0.650136	1.09297	0.824001	1.17133
LYRM2	129.295	84.0859	745.508	600.934	0.650342	0.806073	0.824263	0.863861
NRBF2	272.344	177.141	701.493	540.392	0.65043	0.770346	0.824374	0.825572
ATG4D	279.222	181.626	240.708	237.683	0.650471	0.98743	0.824425	1.05822
ABRAXAS2	156.804	102.024	731.754	679.414	0.650647	0.928474	0.824648	0.995037
SERPINB8	170.559	110.993	1122.39	989.971	0.650762	0.882022	0.824795	0.945254
RAD1	177.436	115.478	496.547	409.218	0.650813	0.824127	0.824859	0.88321
CWC15	177.436	115.478	342.494	347.555	0.650813	1.01478	0.824859	1.08753
TRAPPC8	191.191	124.447	2484.11	2294.98	0.650904	0.923866	0.824974	0.990098
RIN1	191.191	124.447	451.156	504.515	0.650904	1.11827	0.824974	1.19844
GPNMB	218.701	142.385	788.148	614.388	0.651051	0.779533	0.825161	0.835419
HYLS1	287.475	187.231	374.13	344.192	0.651297	0.91998	0.825472	0.985934
RDH14	158.18	103.145	442.903	363.251	0.652077	0.820159	0.826461	0.878956
TVP23B	240.708	156.96	969.711	816.194	0.652077	0.841688	0.826461	0.902029
EIF4ENIF1	158.18	103.145	1548.79	1320.71	0.652077	0.852738	0.826461	0.913871
CKS1B	82.5286	53.815	610.712	522.454	0.652077	0.855484	0.826461	0.916814
CCDC84	130.67	85.207	521.306	446.216	0.652077	0.855958	0.826461	0.917323
SDF4	323.237	210.775	616.213	531.423	0.652077	0.862401	0.826461	0.924227
DMXL1	96.2834	62.7841	2412.59	2113.36	0.652077	0.875973	0.826461	0.938772
TDG	192.567	125.568	854.171	754.531	0.652077	0.883349	0.826461	0.946677
LBR	213.199	139.022	473.164	435.004	0.652077	0.919352	0.826461	0.985261
CUTC	199.444	130.053	426.398	392.401	0.652077	0.92027	0.826461	0.986244
GTF2IRD2B	130.67	85.207	1240.68	1142.45	0.652077	0.920823	0.826461	0.986838
MRPS21	199.444	130.053	650.6	603.176	0.652077	0.927107	0.826461	0.993572
MCMDC2	130.67	85.207	126.544	119.963	0.652077	0.947992	0.826461	1.01595
SLC44A2	75.6512	49.3304	504.8	478.729	0.652077	0.948354	0.826461	1.01634
ACSF3	178.812	116.599	2625.78	2633.57	0.652077	1.00297	0.826461	1.07487
ADAP2	281.973	183.868	455.283	485.456	0.652077	1.06627	0.826461	1.14272
ZNF598	75.6512	49.3304	580.451	649.143	0.652077	1.11834	0.826461	1.19852
FCSK	116.916	76.2379	499.298	380.068	0.652077	0.761205	0.826461	0.815777
ADGRV1	68.7738	44.8458	169.184	139.022	0.652077	0.821723	0.826461	0.880633
MAP9	61.8964	40.3612	247.586	214.139	0.652077	0.864907	0.826461	0.926913
TMEM86A	110.038	71.7533	134.797	116.599	0.652077	0.865	0.826461	0.927012
CTDSP1	68.7738	44.8458	1089.38	948.489	0.652077	0.870671	0.826461	0.93309
NRSN2	137.548	89.6916	433.275	381.189	0.652077	0.879786	0.826461	0.942859
SUGCT	68.7738	44.8458	1140.27	1006.79	0.652077	0.882939	0.826461	0.946237
ANKRD54	288.85	188.352	781.271	693.989	0.652077	0.888282	0.826461	0.951964
RFX2	116.916	76.2379	1720.72	1601	0.652077	0.930421	0.826461	0.997124
CARD8	103.161	67.2687	1031.61	964.185	0.652077	0.934643	0.826461	1.00165
MLLT6	61.8964	40.3612	1317.71	1256.8	0.652077	0.953781	0.826461	1.02216
XXYLT1	123.793	80.7225	2338.31	2250.14	0.652077	0.962293	0.826461	1.03128
CSNK1D	275.095	179.383	3310.77	3224.41	0.652077	0.973916	0.826461	1.04374
TBL1X	61.8964	40.3612	5368.48	5239.11	0.652077	0.975901	0.826461	1.04586
UBE3D	110.038	71.7533	1169.16	1142.45	0.652077	0.977156	0.826461	1.04721
ELOB	110.038	71.7533	350.747	343.07	0.652077	0.978115	0.826461	1.04824
ZNF256	61.8964	40.3612	123.793	125.568	0.652077	1.01434	0.826461	1.08706
PHF2	110.038	71.7533	1607.93	1732.17	0.652077	1.07727	0.826461	1.1545
NABP2	269.593	176.02	404.39	384.553	0.652908	0.950945	0.827515	1.01912
ATP5MF	221.452	144.628	1048.11	974.275	0.653089	0.929552	0.827744	0.996192
ATP5MF-PTCD1	221.452	144.628	1968.31	1835.31	0.653089	0.932433	0.827744	0.99928
NOP10	200.82	131.174	99.0343	91.9339	0.653193	0.928304	0.827876	0.994854
PGBD4	187.065	122.205	159.555	128.932	0.653275	0.808069	0.82798	0.866
STYXL1	180.187	117.72	1369.97	1335.28	0.653321	0.974678	0.828038	1.04455
COL6A3	325.988	213.018	8258.36	8385.05	0.653452	1.01534	0.828204	1.08813
SF3A2	159.555	104.267	618.964	632.326	0.653482	1.02159	0.828242	1.09483
TRIM16	145.801	95.2974	1039.86	887.947	0.653615	0.85391	0.82841	0.915127
COX6C	145.801	95.2974	588.704	532.544	0.653615	0.904604	0.82841	0.969456
PRMT9	145.801	95.2974	453.907	465.275	0.653615	1.02504	0.82841	1.09853
RPF1	270.969	177.141	594.206	495.546	0.653732	0.833964	0.828558	0.893751
PBLD	257.214	168.172	507.551	442.852	0.65382	0.872528	0.828671	0.93508
HEMK1	125.168	81.8436	1504.77	1403.67	0.653868	0.932815	0.828731	0.99969
MMD	125.168	81.8436	321.862	324.011	0.653868	1.00668	0.828731	1.07885
TNIP1	125.168	81.8436	1116.89	1170.48	0.653868	1.04798	0.828731	1.12311
ZNF830	236.582	154.718	111.414	89.6916	0.653972	0.805033	0.828863	0.862746
LARP6	229.705	150.233	1579.05	1464.22	0.654029	0.927278	0.828935	0.993755
ENGASE	215.95	141.264	390.635	301.588	0.654153	0.772045	0.829093	0.827394
RPL11	215.95	141.264	605.21	523.575	0.654153	0.865113	0.829093	0.927134
RTCA	104.536	68.3899	863.799	850.949	0.654222	0.985124	0.829179	1.05575
PCNX4	202.195	132.295	2503.37	2251.26	0.654295	0.899293	0.829272	0.963764
RPAP2	202.195	132.295	1665.7	1601	0.654295	0.961154	0.829272	1.03006
SRRM2	404.39	264.59	1998.57	1923.89	0.654295	0.962632	0.829272	1.03164
MTHFD2L	495.172	324.011	1524.03	1301.65	0.654341	0.854085	0.82933	0.915315
ZNF616	97.6588	63.9053	502.049	384.553	0.654373	0.765967	0.829371	0.82088
TEFM	97.6588	63.9053	207.697	171.535	0.654373	0.825892	0.829371	0.885101
KIF21A	97.6588	63.9053	911.941	882.341	0.654373	0.967542	0.829371	1.03691
WDR31	90.7814	59.4207	231.08	205.17	0.654547	0.887872	0.829591	0.951525
PAIP1	181.563	118.841	1140.27	1031.45	0.654547	0.90457	0.829591	0.969419
GGA3	181.563	118.841	793.65	841.98	0.654547	1.0609	0.829591	1.13695
C15orf40	265.467	173.778	832.163	736.592	0.654611	0.885154	0.829672	0.948611
MTHFSD	174.686	114.357	788.148	695.11	0.654644	0.881954	0.829715	0.945182
ATG16L1	258.59	169.293	1178.78	1121.15	0.654678	0.951104	0.829758	1.01929
ZNF17	83.9041	54.9361	266.842	201.806	0.654749	0.756275	0.829848	0.810492
ATP6AP2	83.9041	54.9361	386.509	299.346	0.654749	0.774486	0.829848	0.83001
GORAB	167.808	109.872	784.022	665.96	0.654749	0.849416	0.829848	0.910311
ZNF268	83.9041	54.9361	1034.36	1004.55	0.654749	0.971178	0.829848	1.0408
TPK1	160.931	105.388	526.808	534.786	0.654863	1.01515	0.829993	1.08792
USF1	154.053	100.903	269.593	235.441	0.654988	0.873317	0.83015	0.935926
TNRC6A	154.053	100.903	3506.09	3298.41	0.654988	0.940766	0.83015	1.00821
RNF170	77.0267	50.4515	632.719	660.355	0.654988	1.04368	0.83015	1.1185
FDXR	224.203	146.87	176.061	190.595	0.655077	1.08255	0.830264	1.16016
ZNF76	147.176	96.4185	806.029	681.656	0.655124	0.845697	0.830323	0.906325
TBC1D22A	147.176	96.4185	5409.75	5387.1	0.655124	0.995814	0.830323	1.0672
ING2	147.176	96.4185	286.099	289.255	0.655124	1.01103	0.830323	1.08351
FPGS	287.475	188.352	650.6	569.542	0.655197	0.87541	0.830415	0.938168
PSMD10	70.1493	45.967	181.563	131.174	0.655273	0.722471	0.830512	0.774266
CIAO2A	140.299	91.9339	404.39	324.011	0.655273	0.801234	0.830512	0.858675
PPP2R5A	140.299	91.9339	1177.41	1015.76	0.655273	0.862707	0.830512	0.924555
TMX1	350.747	229.835	339.743	332.98	0.655273	0.980095	0.830512	1.05036
PIGU	70.1493	45.967	1097.63	1092	0.655273	0.994866	0.830512	1.06619
FZD3	70.1493	45.967	287.475	294.861	0.655273	1.02569	0.830512	1.09923
IPO9	343.869	225.35	2336.93	2120.09	0.655337	0.907208	0.830593	0.972246
TRMT13	133.421	87.4493	404.39	383.432	0.655438	0.948173	0.830721	1.01615
SDHA	259.965	170.414	1237.93	1152.54	0.655527	0.931021	0.830834	0.997766
AC021087.5	259.965	170.414	3874.72	3697.54	0.655527	0.954273	0.830834	1.02269
THAP6	189.816	124.447	887.182	748.925	0.655621	0.844161	0.830952	0.90468
SLC29A3	189.816	124.447	480.041	460.791	0.655621	0.959898	0.830952	1.02871
ARMCX6	63.2719	41.4824	86.655	114.357	0.655621	1.31968	0.830952	1.41429
DCPS	182.938	119.963	412.643	395.764	0.655754	0.959096	0.831121	1.02785
AMD1	753.761	494.425	1420.87	1363.31	0.655944	0.959493	0.831362	1.02828
WNT2	56.3945	36.9978	398.888	334.101	0.656053	0.837581	0.8315	0.897628
CEBPZOS	112.789	73.9956	407.141	384.553	0.656053	0.94452	0.8315	1.01223
EIF4E	162.306	106.509	2273.66	1995.64	0.656221	0.87772	0.831714	0.940644
SSH2	162.306	106.509	3131.96	2830.89	0.656221	0.903872	0.831714	0.968672
ZNF600	105.912	69.511	482.792	418.187	0.656311	0.866185	0.831827	0.928282
PPRC1	353.497	232.077	1413.99	1372.28	0.656517	0.970503	0.832088	1.04008
MTRF1	99.0343	65.0264	433.275	362.13	0.656605	0.835797	0.8322	0.895716
DHX35	99.0343	65.0264	964.209	940.641	0.656605	0.975557	0.8322	1.0455
ZC3H13	148.551	97.5396	2012.32	1809.53	0.656605	0.899224	0.8322	0.96369
GRHL1	141.674	93.0551	657.478	590.844	0.656825	0.898652	0.832479	0.963077
MAPKAPK5	141.674	93.0551	1957.3	1788.23	0.656825	0.913618	0.832479	0.979116
GEMIN6	141.674	93.0551	184.314	176.02	0.656825	0.955	0.832479	1.02347
ORMDL2	141.674	93.0551	220.076	217.502	0.656825	0.988304	0.832479	1.05916
ZNF484	92.1569	60.5418	441.528	371.099	0.656943	0.840488	0.832628	0.900744
MRTFB	184.314	121.084	2115.48	1941.82	0.656943	0.91791	0.832628	0.983716
PRKAA2	92.1569	60.5418	423.647	437.247	0.656943	1.0321	0.832628	1.10609
ZFPL1	134.797	88.5705	272.344	236.562	0.657067	0.868612	0.832786	0.930884
SRP68	269.593	177.141	1173.28	1148.05	0.657067	0.978497	0.832786	1.04865
CIAO2B	269.593	177.141	86.655	104.267	0.657067	1.20324	0.832786	1.2895
SF3B1	262.716	172.656	2305.3	2101.03	0.657198	0.91139	0.832951	0.976728
SSR2	262.716	172.656	587.328	586.359	0.657198	0.998349	0.832951	1.06992
STX1A	305.356	200.685	922.945	887.947	0.657217	0.96208	0.832976	1.03105
NR2C1	127.919	84.0859	1068.75	898.037	0.657335	0.840273	0.833126	0.900512
PPM1B	383.758	252.258	1966.93	1674.99	0.657335	0.851576	0.833126	0.912626
AC013717.1	383.758	252.258	2170.5	1865.59	0.657335	0.859518	0.833126	0.921138
ZNF79	163.682	107.63	526.808	494.425	0.657556	0.938531	0.833406	1.00581
DDHD2	121.042	79.6013	1155.4	1007.91	0.657634	0.872347	0.833504	0.934886
PPP2R1A	199.444	131.174	2291.54	2080.85	0.657698	0.908054	0.833585	0.973153
MACO1	156.804	103.145	1499.27	1244.47	0.657797	0.830052	0.83371	0.889559
MSANTD4	114.165	75.1167	735.88	667.081	0.657969	0.906509	0.833929	0.971497
CYP27A1	114.165	75.1167	427.773	463.033	0.657969	1.08243	0.833929	1.16003
NARS	335.616	220.866	1537.78	1444.04	0.65809	0.939037	0.834082	1.00636
CHCHD1	221.452	145.749	83.9041	68.3899	0.658152	0.815096	0.834161	0.873531
TRMT1L	257.214	169.293	731.754	682.777	0.658179	0.93307	0.834195	0.999963
SUPT16H	178.812	117.72	1116.89	997.819	0.658347	0.893393	0.834408	0.957441
AKNAD1	214.574	141.264	1616.18	1513.55	0.658347	0.936493	0.834408	1.00363
TBX4	107.287	70.6322	803.278	769.106	0.658347	0.957459	0.834408	1.0261
CLCC1	214.574	141.264	795.025	763.5	0.658347	0.960347	0.834408	1.02919
SIRPA	71.5248	47.0881	1431.87	1198.5	0.658347	0.83702	0.834408	0.897026
TMEM185B	171.935	113.236	436.026	347.555	0.658598	0.797097	0.834725	0.854241
SEC61G	171.935	113.236	423.647	393.522	0.658598	0.928892	0.834725	0.995485
ZNF572	136.172	89.6916	180.187	153.597	0.658663	0.852429	0.834809	0.91354
DDX18	136.172	89.6916	653.351	640.174	0.658663	0.979831	0.834809	1.05008
C1orf21	100.41	66.1476	1599.68	1327.44	0.658776	0.829814	0.834952	0.889304
RNF216	301.229	198.443	3880.22	3697.54	0.658776	0.95292	0.834952	1.02124
MARK3	301.229	198.443	4181.45	4045.09	0.658776	0.96739	0.834952	1.03674
DYNLT1	387.884	255.621	632.719	572.905	0.659014	0.905465	0.835253	0.970379
PANX2	64.6474	42.6035	162.306	158.081	0.659014	0.973971	0.835253	1.0438
TMEM126B	222.827	146.87	187.065	169.293	0.659121	0.904996	0.835389	0.969876
RBM34	222.827	146.87	1053.62	995.577	0.659121	0.944915	0.835389	1.01266
RPRD1A	158.18	104.267	2365.82	2150.36	0.659165	0.908927	0.835444	0.974088
S100PBP	158.18	104.267	1309.45	1201.87	0.659165	0.917839	0.835444	0.98364
CUEDC2	158.18	104.267	273.72	254.5	0.659165	0.929783	0.835444	0.99644
SCCPDH	158.18	104.267	796.401	787.044	0.659165	0.988251	0.835444	1.0591
BOC	93.5324	61.663	1195.29	1042.67	0.659269	0.872312	0.835576	0.934849
DCAF5	93.5324	61.663	2595.52	2426.16	0.659269	0.934747	0.835576	1.00176
ITSN2	122.417	80.7225	2546.01	2374.59	0.659403	0.932671	0.835747	0.999534
SPOP	122.417	80.7225	1497.89	1417.13	0.659403	0.94608	0.835747	1.01391
WDR33	151.302	99.7819	4174.57	3694.17	0.659487	0.884923	0.835852	0.948364
NUP54	151.302	99.7819	672.608	630.084	0.659487	0.936777	0.835852	1.00394
BFAR	173.31	114.357	1925.67	1601	0.65984	0.831398	0.8363	0.891001
BRAF	144.425	95.2974	3701.41	3222.17	0.65984	0.870526	0.8363	0.932935
AGGF1	173.31	114.357	672.608	604.297	0.65984	0.898439	0.8363	0.962849
MPI	231.08	152.476	733.129	671.566	0.65984	0.916027	0.8363	0.981698
VPS45	86.655	57.1784	1043.99	967.548	0.65984	0.926782	0.8363	0.993224
ANKRD36	86.655	57.1784	2409.83	2319.65	0.65984	0.962576	0.8363	1.03158
LRP1	144.425	95.2974	3664.27	3635.87	0.65984	0.992251	0.8363	1.06339
TRMT44	86.655	57.1784	1497.89	1530.36	0.65984	1.02168	0.8363	1.09492
HLA-DMA	195.318	128.932	550.191	493.304	0.660113	0.896606	0.836646	0.960884
MRPL50	195.318	128.932	276.471	263.469	0.660113	0.952973	0.836646	1.02129
HMGCS1	166.433	109.872	664.355	706.322	0.66016	1.06317	0.836706	1.13939
DNM1	137.548	90.8128	1286.07	1220.93	0.660228	0.949347	0.836792	1.01741
ZNF669	246.21	162.566	171.935	156.96	0.660273	0.912907	0.836849	0.978354
KCTD21	108.663	71.7533	416.769	363.251	0.660331	0.871588	0.836922	0.934073
SHROOM1	108.663	71.7533	350.747	320.648	0.660331	0.914186	0.836922	0.979725
APOL2	188.44	124.447	632.719	603.176	0.660406	0.953308	0.837018	1.02165
VRK3	188.44	124.447	1669.83	1681.72	0.660406	1.00712	0.837018	1.07932
EXOC8	188.44	124.447	165.057	167.051	0.660406	1.01208	0.837018	1.08463
PRRX1	79.7776	52.6938	3356.16	2944.13	0.660509	0.87723	0.837148	0.94012
DCUN1D4	159.555	105.388	2323.18	2163.81	0.660509	0.9314	0.837148	0.998173
PPP1R8	449.781	297.104	662.98	664.839	0.660552	1.0028	0.837202	1.0747
UBE2A	210.448	139.022	530.934	459.67	0.660601	0.865775	0.837264	0.927844
NDUFA11	210.448	139.022	1449.75	1419.37	0.660601	0.979043	0.837264	1.04923
LTV1	130.67	86.3282	806.029	670.445	0.660657	0.831787	0.837335	0.891419
ZCWPW2	130.67	86.3282	899.562	809.467	0.660657	0.899846	0.837335	0.964357
SPTLC1	130.67	86.3282	1966.93	1851.01	0.660657	0.941065	0.837335	1.00853
AC098650.1	130.67	86.3282	4192.45	4017.06	0.660657	0.958166	0.837335	1.02686
FCHSD2	181.563	119.963	2755.08	2503.52	0.660722	0.908692	0.837418	0.973836
PARG	181.563	119.963	1859.64	1738.9	0.660722	0.935069	0.837418	1.00211
PPP1R37	152.678	100.903	1181.53	1144.69	0.660889	0.968816	0.837629	1.03827
KBTBD6	101.785	67.2687	141.674	105.388	0.660889	0.743874	0.837629	0.797203
PLA2R1	50.8926	33.6344	795.025	753.41	0.660889	0.947655	0.837629	1.01559
ASPSCR1	101.785	67.2687	942.201	900.28	0.660889	0.955507	0.837629	1.02401
PCNX2	50.8926	33.6344	1892.66	1838.68	0.660889	0.971481	0.837629	1.04113
COPS5	174.686	115.478	562.57	501.152	0.661062	0.890826	0.837849	0.95469
MRPL43	123.793	81.8436	756.512	663.718	0.661133	0.87734	0.837939	0.940237
DENND4B	123.793	81.8436	833.539	736.592	0.661133	0.883693	0.837939	0.947046
MCRS1	123.793	81.8436	471.788	456.306	0.661133	0.967184	0.837939	1.03652
NUDT3	247.586	163.687	1770.24	1740.02	0.661133	0.982928	0.837939	1.0534
TIA1	196.693	130.053	1390.61	1324.07	0.661197	0.952155	0.83802	1.02042
BLOC1S4	196.693	130.053	187.065	183.868	0.661197	0.98291	0.83802	1.05338
HOXA11	167.808	110.993	244.835	177.141	0.66143	0.723512	0.838316	0.775381
MRPL19	94.9079	62.7841	638.221	538.15	0.661527	0.843203	0.838438	0.903653
ALS2CL	116.916	77.359	254.463	274.681	0.661666	1.07945	0.838615	1.15684
ELOC	138.923	91.9339	1426.37	1264.65	0.661761	0.886623	0.838735	0.950186
AEBP2	138.923	91.9339	3101.7	2800.62	0.661761	0.902931	0.838735	0.967663
NME6	138.923	91.9339	528.183	480.971	0.661761	0.910615	0.838735	0.975898
KCTD3	160.931	106.509	1043.99	939.52	0.66183	0.899935	0.838822	0.964452
P4HA2	226.954	150.233	1105.88	912.612	0.661957	0.825234	0.838983	0.884396
ARFIP2	248.961	164.808	595.581	533.665	0.661984	0.896041	0.839018	0.960279
ITCH	336.992	223.108	6730.21	6338.96	0.662058	0.941866	0.839111	1.00939
BLMH	88.0305	58.2996	661.604	577.39	0.662265	0.872712	0.839374	0.935277
RGS9	66.0229	43.7247	577.7	516.848	0.662265	0.894665	0.839374	0.958804
DUS4L	220.076	145.749	240.708	219.744	0.662265	0.912907	0.839374	0.978354
LRP12	88.0305	58.2996	991.719	941.762	0.662265	0.949626	0.839374	1.01771
VRK2	110.038	72.8744	1689.09	1691.81	0.662265	1.00161	0.839374	1.07342
MAPK8IP2	66.0229	43.7247	452.532	460.791	0.662265	1.01825	0.839374	1.09125
GBP1	88.0305	58.2996	272.344	283.65	0.662265	1.04151	0.839374	1.11618
MRPL36	132.046	87.4493	83.9041	98.6608	0.662265	1.17588	0.839374	1.26018
SPATA1	154.053	102.024	370.003	308.315	0.662265	0.833277	0.839374	0.893015
AGO1	330.114	218.623	766.14	727.623	0.662265	0.949726	0.839374	1.01781
LAMTOR1	389.26	257.863	1821.13	1633.51	0.662445	0.896975	0.839602	0.96128
CCNC	191.191	126.689	594.206	569.542	0.662632	0.958492	0.839839	1.02721
ZNF347	169.184	112.115	1046.74	935.035	0.66268	0.893285	0.839899	0.957325
PIGZ	169.184	112.115	357.624	341.949	0.66268	0.95617	0.839899	1.02472
HAUS1	316.36	209.654	288.85	308.315	0.662708	1.06739	0.839936	1.14391
TRMT5	147.176	97.5396	268.218	200.685	0.662742	0.748216	0.839978	0.801856
NAA50	294.352	195.079	1221.42	1004.55	0.662742	0.822439	0.839978	0.8814
FGGY	147.176	97.5396	1338.34	1145.81	0.662742	0.856144	0.839978	0.917522
SNX5	147.176	97.5396	1913.29	1766.93	0.662742	0.923502	0.839978	0.989708
FAM83E	125.168	82.9648	1358.97	1274.74	0.662825	0.93802	0.840084	1.00527
RCL1	125.168	82.9648	1049.49	1059.48	0.662825	1.00952	0.840084	1.0819
THTPA	125.168	82.9648	199.444	213.018	0.662825	1.06806	0.840084	1.14463
LRRC37A3	559.819	371.099	1211.79	1115.54	0.662891	0.920568	0.840167	0.986564
DCK	103.161	68.3899	459.409	438.368	0.662945	0.954199	0.840235	1.02261
THOC2	81.1531	53.815	1895.41	1714.23	0.663129	0.904413	0.840469	0.969251
SLC43A3	81.1531	53.815	407.141	387.916	0.663129	0.952781	0.840469	1.02109
ZBTB17	140.299	93.0551	1180.16	1024.73	0.663264	0.868296	0.84064	0.930544
APLF	140.299	93.0551	1257.19	1141.33	0.663264	0.907842	0.84064	0.972926
TMX3	140.299	93.0551	1023.35	950.731	0.663264	0.929034	0.84064	0.995637
KXD1	258.59	171.535	541.938	478.729	0.663349	0.883365	0.840748	0.946695
SERPINB2	59.1455	39.2401	343.869	294.861	0.66345	0.857481	0.840876	0.918954
PARS2	236.582	156.96	317.735	276.923	0.66345	0.871553	0.840876	0.934035
ZNF214	59.1455	39.2401	174.686	155.839	0.66345	0.892113	0.840876	0.956069
AP000311.1	236.582	156.96	2735.82	2594.33	0.66345	0.948282	0.840876	1.01626
TBX18	59.1455	39.2401	1826.63	1745.62	0.66345	0.955651	0.840876	1.02416
EDRF1	177.436	117.72	1144.4	1105.45	0.66345	0.965967	0.840876	1.03522
EXD3	236.582	156.96	1898.16	1936.22	0.66345	1.02005	0.840876	1.09318
ATP5PO	236.582	156.96	372.754	383.432	0.66345	1.02865	0.840876	1.10239
BUB3	310.858	206.291	731.754	688.383	0.663618	0.940731	0.841088	1.00817
ERMARD	251.712	167.051	726.252	685.02	0.663657	0.943227	0.841138	1.01085
ZNF449	96.2834	63.9053	323.237	252.258	0.663721	0.780411	0.841219	0.836359
MAIP1	96.2834	63.9053	704.244	619.993	0.663721	0.880367	0.841219	0.943481
MRPL16	96.2834	63.9053	156.804	140.143	0.663721	0.893746	0.841219	0.957819
AMMECR1L	96.2834	63.9053	1060.49	950.731	0.663721	0.8965	0.841219	0.960771
CDK2	96.2834	63.9053	110.038	103.145	0.663721	0.93736	0.841219	1.00456
KLHL18	133.421	88.5705	949.079	840.859	0.663841	0.885974	0.841371	0.94949
NDUFB5	170.559	113.236	482.792	479.85	0.663909	0.993906	0.841457	1.06516
SNRPA1	207.697	137.901	595.581	552.725	0.663952	0.928042	0.841512	0.994574
NCAPD3	430.524	285.892	1082.5	1059.48	0.664056	0.978737	0.841643	1.0489
UBQLN4	111.414	73.9956	870.677	730.987	0.664152	0.839562	0.841766	0.89975
CSTF1	111.414	73.9956	462.16	399.128	0.664152	0.863614	0.841766	0.925527
MRPL38	222.827	147.991	405.766	373.341	0.664152	0.920091	0.841766	0.986053
CSAD	222.827	147.991	332.865	318.405	0.664152	0.956559	0.841766	1.02514
ZNF766	185.689	123.326	896.811	765.742	0.664152	0.85385	0.841766	0.915064
PECR	74.2757	49.3304	607.961	539.271	0.664152	0.887016	0.841766	0.950607
PSMB5	148.551	98.6608	891.309	791.529	0.664152	0.888052	0.841766	0.951717
CORO7	185.689	123.326	2107.23	1923.89	0.664152	0.912993	0.841766	0.978446
CORO7-PAM16	185.689	123.326	2801.85	2593.21	0.664152	0.925536	0.841766	0.991888
COG4	215.95	143.507	800.527	783.681	0.664537	0.978955	0.842253	1.04914
AC138894.1	89.406	59.4207	781.271	723.139	0.664617	0.925593	0.842354	0.99195
CLN3	89.406	59.4207	481.417	467.518	0.664617	0.971129	0.842354	1.04075
NAT1	89.406	59.4207	89.406	95.2974	0.664617	1.06589	0.842354	1.14231
MBD1	231.08	153.597	844.543	861.04	0.664691	1.01953	0.842449	1.09262
NDUFS8	141.674	94.1762	430.524	417.066	0.664738	0.96874	0.842509	1.03819
NSUN2	193.942	128.932	1324.58	1211.96	0.664795	0.914973	0.84258	0.980568
TMEM218	104.536	69.511	199.444	146.87	0.664947	0.736397	0.842773	0.78919
TMEM119	52.2681	34.7555	134.797	103.145	0.664947	0.765192	0.842773	0.820049
STT3B	209.072	139.022	2836.23	2553.97	0.664947	0.900479	0.842773	0.965035
SUCLG2	156.804	104.267	3096.2	3088.76	0.664947	0.997596	0.842773	1.06911
SEC13	224.203	149.112	1280.57	1157.02	0.665078	0.903522	0.842939	0.968296
MKLN1	187.065	124.447	6757.72	5934.22	0.665262	0.87814	0.843172	0.941095
ACOT8	321.862	214.139	576.325	520.211	0.665313	0.902636	0.843237	0.967347
SMAD4	321.862	214.139	1881.65	1760.2	0.665313	0.935454	0.843237	1.00252
CCDC130	134.797	89.6916	1839.01	1595.39	0.665384	0.867525	0.843327	0.929719
FAM174A	67.3983	44.8458	328.739	335.222	0.665384	1.01972	0.843327	1.09283
USP19	352.122	234.319	606.585	627.841	0.665449	1.03504	0.84341	1.10925
EEF1E1	217.325	144.628	976.588	781.438	0.66549	0.800172	0.843461	0.857537
EEF1E1-BLOC1S5	217.325	144.628	1786.74	1478.79	0.66549	0.827646	0.843461	0.88698
ELP3	149.927	99.7819	1929.79	1779.26	0.665537	0.921994	0.843521	0.988092
NEDD8-MDP1	232.456	154.718	1185.66	1026.97	0.665581	0.866158	0.843577	0.928253
NEDD8	232.456	154.718	632.719	548.24	0.665581	0.866482	0.843577	0.928601
FGF5	82.5286	54.9361	938.075	707.443	0.665662	0.754143	0.843679	0.808208
NUS1	82.5286	54.9361	702.868	636.811	0.665662	0.906017	0.843679	0.97097
TCF12	165.057	109.872	7225.38	6551.97	0.665662	0.9068	0.843679	0.971809
TANGO6	247.586	164.808	1933.92	1770.29	0.665662	0.915389	0.843679	0.981014
SLC22A4	180.187	119.963	1706.97	1697.41	0.665765	0.994404	0.84381	1.06569
ACTR2	292.976	195.079	1918.79	1671.63	0.665853	0.871189	0.843921	0.933645
HACD1	97.6588	65.0264	409.892	396.885	0.665853	0.968268	0.843921	1.03768
MCAT	97.6588	65.0264	220.076	247.773	0.665853	1.12585	0.843921	1.20656
UQCRC1	210.448	140.143	416.769	396.885	0.665928	0.95229	0.844016	1.02056
PRDM2	240.708	160.324	3960	3607.85	0.66605	0.911073	0.844171	0.976388
KDM5B	240.708	160.324	2105.85	1939.58	0.66605	0.921042	0.844171	0.987073
AC091021.1	240.708	160.324	2031.58	1879.04	0.66605	0.924916	0.844171	0.991224
ETFRF1	143.05	95.2974	272.344	213.018	0.666184	0.782163	0.844341	0.838237
H6PD	286.099	190.595	1063.24	922.703	0.666184	0.867819	0.844341	0.930033
MED15	218.701	145.749	3126.46	2958.7	0.666431	0.946343	0.844653	1.01419
GMFG	248.961	165.93	130.67	95.2974	0.666487	0.729296	0.844725	0.78158
RELCH	294.352	196.2	1606.56	1474.31	0.66655	0.917681	0.844805	0.98347
MIB1	151.302	100.903	1950.43	1738.9	0.666897	0.891547	0.845244	0.955463
CCDC71	272.344	181.626	521.306	484.335	0.666897	0.92908	0.845244	0.995687
COX20	75.6512	50.4515	612.087	586.359	0.666897	0.957967	0.845244	1.02664
LRRC42	75.6512	50.4515	563.945	617.751	0.666897	1.09541	0.845244	1.17394
SPATA2	196.693	131.174	368.628	309.436	0.666897	0.839427	0.845244	0.899606
SERPINF1	45.3907	30.2709	215.95	181.626	0.666897	0.841054	0.845244	0.90135
LAPTM4A	242.084	161.445	1067.37	958.579	0.666897	0.898076	0.845244	0.96246
CEP152	60.521	40.3612	741.382	677.172	0.666897	0.913391	0.845244	0.978873
TBC1D2B	196.693	131.174	2185.63	2064.03	0.666897	0.944362	0.845244	1.01206
CDK5RAP2	121.042	80.7225	2559.76	2553.97	0.666897	0.997737	0.845244	1.06927
ZNF407	121.042	80.7225	3843.08	3901.59	0.666897	1.01522	0.845244	1.08801
ADGRD1	181.563	121.084	3059.06	3246.84	0.666897	1.06138	0.845244	1.13748
PPFIA1	598.332	399.128	2675.3	2503.52	0.667067	0.935789	0.84546	1.00288
BUD23	280.597	187.231	682.236	672.687	0.66726	0.986003	0.845704	1.05669
TNKS	204.946	136.78	4335.5	4059.67	0.667394	0.936378	0.845874	1.00351
SNX1	189.816	126.689	1418.12	1229.9	0.667434	0.867275	0.845925	0.92945
UCKL1	258.59	172.656	601.083	590.844	0.667685	0.982965	0.846243	1.05343
PRR14L	228.329	152.476	2196.64	2020.3	0.667789	0.919726	0.846376	0.985662
AP1S1	114.165	76.2379	202.195	189.474	0.667789	0.937083	0.846376	1.00426
TXNDC17	213.199	142.385	125.168	99.7819	0.667853	0.797182	0.846456	0.854332
MRPS18B	213.199	142.385	411.267	394.643	0.667853	0.959578	0.846456	1.02837
TAF10	312.233	208.533	797.776	783.681	0.667876	0.982331	0.846485	1.05276
RBM48	99.0343	66.1476	418.145	319.526	0.667926	0.764152	0.846548	0.818935
RCBTB2	99.0343	66.1476	405.766	340.828	0.667926	0.839963	0.846548	0.900181
STIM2	198.069	132.295	1319.08	1235.5	0.667926	0.936638	0.846548	1.00379
KAT6B	99.0343	66.1476	2441.47	2371.22	0.667926	0.971227	0.846548	1.04085
TXN	381.007	254.5	1166.4	1029.21	0.667967	0.88238	0.8466	0.945638
EFCAB13	464.911	310.557	320.486	295.982	0.667993	0.923542	0.846633	0.989752
PAN2	182.938	122.205	561.194	489.94	0.668011	0.873032	0.846656	0.93562
SUMO2	83.9041	56.0573	1057.74	920.46	0.668111	0.870213	0.846784	0.932599
MBD5	83.9041	56.0573	4054.9	3747.99	0.668111	0.92431	0.846784	0.990574
LAMA4	167.808	112.115	3728.92	3722.2	0.668111	0.998199	0.846784	1.06976
ABTB1	152.678	102.024	342.494	324.011	0.668232	0.946035	0.846936	1.01386
RNASEH2B	152.678	102.024	1269.56	1291.56	0.668232	1.01732	0.846936	1.09026
ZNF638	221.452	147.991	3532.22	3218.81	0.668277	0.91127	0.846994	0.976599
HPRT1	68.7738	45.967	492.421	459.67	0.668379	0.93349	0.847122	1.00041
EXOC5	137.548	91.9339	1147.15	1084.15	0.668379	0.945081	0.847122	1.01283
UHRF2	275.095	183.868	3686.28	3589.91	0.668379	0.973857	0.847122	1.04367
MIPOL1	68.7738	45.967	1096.25	1081.91	0.668379	0.98691	0.847122	1.05766
PCNP	328.739	219.744	711.121	734.35	0.668447	1.03267	0.847209	1.1067
PPCS	259.965	173.778	755.137	710.806	0.668465	0.941295	0.847232	1.00878
GMPPA	191.191	127.811	224.203	248.894	0.668496	1.11013	0.847271	1.18972
EMP3	313.609	209.654	1133.39	924.945	0.668522	0.816085	0.847304	0.874591
ARHGAP4	122.417	81.8436	284.724	303.83	0.668562	1.06711	0.847354	1.14361
TSR3	244.835	163.687	115.54	132.295	0.668562	1.14502	0.847354	1.2271
MYL12B	283.348	189.474	856.922	781.438	0.668695	0.911913	0.847524	0.977289
MROH8	53.6436	35.8766	504.8	369.978	0.668797	0.73292	0.847652	0.785464
TMEM251	214.574	143.507	416.769	318.405	0.668797	0.763984	0.847652	0.818755
AL110118.2	214.574	143.507	1266.81	1028.09	0.668797	0.811556	0.847652	0.869737
BOLA3	214.574	143.507	294.352	271.317	0.668797	0.921744	0.847652	0.987825
LIN52	107.287	71.7533	1299.83	1218.68	0.668797	0.937576	0.847652	1.00479
ZDHHC13	160.931	107.63	698.742	763.5	0.668797	1.09268	0.847652	1.17101
AC114490.3	145.801	97.5396	614.838	548.24	0.668994	0.891682	0.847902	0.955607
ZSCAN23	145.801	97.5396	240.708	219.744	0.668994	0.912907	0.847902	0.978354
EIF2B5	130.67	87.4493	502.049	403.612	0.669237	0.80393	0.84821	0.861565
DNAJA3	261.341	174.899	1394.73	1274.74	0.669237	0.913969	0.84821	0.979492
PTCD2	207.697	139.022	722.125	704.079	0.66935	0.97501	0.848354	1.04491
WDR82	284.724	190.595	1364.47	1220.93	0.669402	0.894798	0.84842	0.958947
G3BP1	361.75	242.167	2475.86	2380.19	0.669432	0.96136	0.848458	1.03028
CEP350	192.567	128.932	2822.48	2429.52	0.669543	0.860776	0.848598	0.922486
PUM2	192.567	128.932	4646.36	4055.18	0.669543	0.872766	0.848598	0.935335
TAC1	77.0267	51.5727	143.05	134.537	0.669543	0.940495	0.848598	1.00792
KATNAL1	77.0267	51.5727	1418.12	1334.16	0.669543	0.940799	0.848598	1.00825
PDIA5	231.08	154.718	3305.27	3196.39	0.669543	0.967057	0.848598	1.03639
NOM1	292.976	196.2	843.167	729.866	0.66968	0.865624	0.848771	0.927681
AL157935.2	292.976	196.2	1526.78	1439.55	0.66968	0.942868	0.848771	1.01046
ST6GALNAC6	292.976	196.2	569.447	548.24	0.66968	0.962758	0.848771	1.03178
MRPS18A	177.436	118.841	565.321	489.94	0.669769	0.866659	0.848884	0.928791
LSM6	177.436	118.841	821.159	829.648	0.669769	1.01034	0.848884	1.08277
KLHL20	138.923	93.0551	998.596	899.159	0.669831	0.900423	0.848963	0.964975
ALG1	239.333	160.324	319.111	311.678	0.669878	0.97671	0.849022	1.04673
RAB5A	200.82	134.537	1979.31	1701.9	0.669942	0.859844	0.849104	0.921487
LRRC14	100.41	67.2687	1042.61	958.579	0.669942	0.919402	0.849104	0.985315
ANAPC5	200.82	134.537	811.531	765.742	0.669942	0.943577	0.849104	1.01122
YBEY	224.203	150.233	573.574	445.095	0.670079	0.776003	0.849277	0.831635
EPC2	347.996	233.198	3144.34	2908.25	0.670118	0.924916	0.849327	0.991224
BEND3	61.8964	41.4824	774.393	685.02	0.67019	0.884589	0.849418	0.948006
WNT5A	61.8964	41.4824	1735.85	1586.42	0.67019	0.913915	0.849418	0.979434
SLC25A14	61.8964	41.4824	148.551	137.901	0.67019	0.928304	0.849418	0.994854
COL13A1	61.8964	41.4824	1261.31	1297.17	0.67019	1.02843	0.849418	1.10215
[truncated: 7,817 more rows]
